# Supplementary material for: Profiling of Matched Adipose and Skeletal Muscle in Human Pancreatic Cancer Cachexia Reveals Distinct Gene Profiles with Convergent Pathways
Source: Preprints.org preprint supplement (doi:10.20944/preprints202103.0658.v1), 2021-03-26
Supplement: Supplementary file 3 [file supplementary]

## Sheet: Table S1
Supplementary Table S1. Differentially expressed genes in skeletal muscle related to Figure 3
Gene	Fold change	pvalue	padj
COL1A1	-7.51215	3.43558e-08	0.000160857
HMGCS2	-6.19226	0.000951057	0.044239
COL3A1	-5.62523	3.61477e-08	0.000160857
ASPN	-5.58056	1.20485e-07	0.000268078
DDN	-4.8521	0.000233875	0.0215326
TMEM8C	-4.83559	7.54105e-06	NA
CHI3L1	-4.69979	1.22622e-06	0.00125924
LOC653513	-4.19282	3.55248e-05	0.00724198
MXRA5	-4.18474	3.43601e-06	0.00191156
SAA2	-3.88398	0.00461006	0.099726
THY1	-3.88309	2.0749e-05	0.00543136
CPXM1	-3.82062	0.000209324	0.0208877
HP	-3.7958	0.00198699	0.0667939
SFRP4	-3.63234	1.69694e-05	0.00492483
SLC5A1	-3.59844	1.98093e-05	0.00532679
MMP9	-3.59786	0.000199253	0.0201518
TYRP1	-3.58625	0.000794767	0.0405745
NOV	-3.53419	8.49325e-05	0.0116892
COL1A2	-3.44679	1.20796e-06	0.00125924
ECEL1	-3.36007	0.000166181	0.0185828
KRT80	-3.24376	0.000724341	0.0394077
CCL19	-3.22344	0.00247633	0.0737617
COL5A1	-3.20341	7.35121e-08	0.000233283
SFRP2	-3.19058	0.00649769	0.117934
SERPINE1	-3.13856	0.000752466	0.0395579
FZD10	-3.12969	6.63089e-06	0.00278923
GLT1D1	-3.06332	0.00181096	0.0621499
CRABP2	-3.0399	0.000214158	0.0209333
STMN2	-3.03197	0.00177571	NA
CCL3	-3.00702	0.000621703	NA
TPPP3	-2.9473	6.34755e-07	0.00110569
TMEM119	-2.89338	0.000644675	0.0372572
LUM	-2.80475	1.457e-06	0.00138935
FXYD4	-2.78167	0.00145533	0.0543145
SPON1	-2.77625	0.0134719	0.160867
TNC	-2.74025	0.038596	0.266696
ELN	-2.73673	0.000130639	0.015712
SLAMF8	-2.70406	0.000327108	0.026466
CILP2	-2.67309	0.00293094	NA
CCL13	-2.67032	0.00445368	0.099726
CCDC80	-2.66514	1.12484e-05	0.00395175
OGN	-2.6569	5.98453e-05	0.00928993
MOXD1	-2.6564	0.0013461	NA
CD69	-2.63864	0.000929399	0.0441547
ERBB3	-2.63416	0.00857446	0.132162
LGI2	-2.63188	0.000226172	0.0211147
IGJ	-2.6256	0.0111542	0.149506
CAMSAP3	-2.6181	0.00227072	NA
CKB	-2.60938	0.00118317	0.0495152
COL5A2	-2.60802	3.20203e-05	0.00689469
MSMP	-2.60053	0.000123256	0.0150961
TTC39A	-2.60052	0.000226026	0.0211147
MGC39372	-2.55528	0.00922492	0.136267
C2	-2.52368	0.000592501	0.035312
CD163L1	-2.50379	0.00105553	0.0472864
ZNF556	-2.49052	0.00747178	0.125786
CELSR1	-2.48219	0.00185754	NA
BHLHE22	-2.47681	0.00363551	NA
MYH3	-2.46561	0.00538949	0.108187
CTHRC1	-2.4557	0.00113604	0.0481587
TUBB3	-2.45167	0.00213727	NA
KAZALD1	-2.44888	2.31096e-05	0.00566846
IGLL5	-2.44586	0.0194523	0.195401
ESM1	-2.43515	0.000919331	NA
MYBPH	-2.42838	0.0417205	0.274911
COL14A1	-2.41364	0.00185945	0.0634877
TNFAIP6	-2.40767	0.000237976	0.0215787
FAIM2	-2.40654	0.0031084	0.0826637
PHOSPHO1	-2.37695	0.000572634	0.0345305
VASH2	-2.37405	0.0018465	0.0632071
SMIM5	-2.37019	0.00234838	NA
CH25H	-2.36147	0.00622056	0.115339
GDF10	-2.35388	0.0014145	0.0534702
CERCAM	-2.34144	3.75962e-06	0.00193042
FNDC1	-2.33273	0.00455563	0.099726
CD200R1	-2.3292	0.00139116	NA
CYS1	-2.31594	0.00204802	0.0675265
SHANK1	-2.31327	0.000585568	NA
MYL5	-2.31305	0.0145544	0.167973
CRISPLD1	-2.31213	0.0102993	0.144423
FAM180B	-2.30192	0.001391	0.0529056
CRMP1	-2.28769	0.0043044	0.0977275
PDE6G	-2.28449	0.00128956	NA
LTK	-2.2831	0.00549902	NA
GADD45G	-2.28117	0.0149807	0.169917
ABLIM1	-2.27323	0.00131817	0.0513049
TNFRSF18	-2.26985	0.00916488	NA
NLRP3	-2.25985	0.00598274	NA
ARHGDIG	-2.25068	0.0391703	0.267515
CASKIN1	-2.24744	0.00741624	0.125785
IGSF10	-2.23027	0.0137251	0.162031
SIGLEC9	-2.21861	0.00116972	NA
THBS4	-2.2185	0.0220174	0.206558
ADAMTS2	-2.21707	0.000459124	0.0308005
EMB	-2.20314	0.000973843	0.0448304
RASD1	-2.19634	0.027367	0.229924
MMP11	-2.19308	0.00285416	0.0793901
LBP	-2.18613	0.0213384	NA
ITGB8	-2.17434	0.0216728	0.204889
LRRC17	-2.16254	0.00499944	0.104012
FPR3	-2.16012	0.000797718	0.0405745
NGFR	-2.15809	0.00456964	0.099726
PRG4	-2.15346	0.0198469	0.196956
CCR2	-2.14566	0.00216203	NA
IL6	-2.14204	0.0294036	0.238191
INHBE	-2.14145	0.0074185	0.125785
ABCC6	-2.13419	0.0078677	0.127538
SLC45A3	-2.13159	0.00124261	0.0505536
OXCT2	-2.13018	0.00253695	NA
FZD2	-2.12205	0.0215021	0.203873
FAM57B	-2.12152	0.0309366	0.242775
IL4I1	-2.11344	0.0184237	NA
IL7R	-2.11061	0.00931737	0.136689
CCL4	-2.10982	0.00704989	0.123453
HSD11B2	-2.1042	0.00362513	0.0899543
RHOH	-2.10318	0.0021547	NA
TNFAIP8L3	-2.10285	0.00923775	0.136267
PMAIP1	-2.09047	0.00279996	0.0786936
LILRB4	-2.08817	0.00420887	0.0965437
PNMA2	-2.0876	0.00237173	0.0728063
PITPNM1	-2.08716	9.8497e-07	0.00124933
KDELR3	-2.08504	0.000574215	0.0345305
GPR183	-2.08077	0.00631719	0.116969
DIO2	-2.07171	1.77558e-05	0.00493832
TMEM59L	-2.0695	0.00698357	0.123104
CCL2	-2.06119	0.00937088	0.137172
GNA15	-2.05758	0.00174893	0.0607099
SOX3	-2.05716	0.0245064	0.21695
CILP	-2.05396	1.02941e-06	0.00124933
BRSK1	-2.05251	0.0130368	NA
PRUNE2	-2.05107	0.0400962	0.269526
QPCT	-2.0468	0.00722266	0.124738
CYP4F11	-2.04564	0.0310563	NA
IFITM10	-2.04364	0.011612	0.152196
CERKL	-2.03723	0.0328707	NA
ST6GALNAC2	-2.03397	7.82706e-05	0.0112258
FOXI2	-2.02698	0.0185337	NA
BICD1	-2.02697	0.0178983	0.186587
ASPHD2	-2.0265	0.0117726	NA
ABO	-2.02005	0.00452203	NA
SVOP	-2.01549	0.0276836	NA
OSM	-2.01379	0.0275291	NA
VCAN	-2.00727	0.00026615	0.0230721
OMD	-2.0007	0.00488405	0.102842
SOCS3	-2.00006	0.0179538	0.18688
TNFRSF9	-2	0.0207908	NA
MYLK	-1.99981	0.0224616	0.207684
PAPLN	-1.99929	0.00214202	0.0689061
VIPR2	-1.99917	0.00278405	0.0784115
ITGA11	-1.99674	3.79593e-05	0.00734431
CLEC2L	-1.9948	0.0194318	NA
PI16	-1.99367	1.63333e-06	0.00145367
DPYSL3	-1.98947	7.98182e-06	0.00322901
ISLR	-1.98566	0.000172553	0.0185828
DKK3	-1.97942	0.000783862	0.0402483
USP32P1	-1.97853	0.0402702	0.269526
EVI2A	-1.97786	0.00124342	0.0505536
PCDHB14	-1.97698	0.00500625	0.104012
C11orf80	-1.9767	0.0010738	0.0475915
CLIC6	-1.96781	0.022154	0.207243
SDK2	-1.96344	0.00470479	0.100979
SLC4A7	-1.96204	0.000546099	0.0334423
HOXD1	-1.95948	0.0197331	NA
C10orf55	-1.95945	0.02469	NA
OLFML2B	-1.95928	0.000149317	0.0170375
BGN	-1.9563	0.00952484	0.138666
CD28	-1.95596	0.00976007	NA
DKFZp451B082	-1.95468	0.0137542	0.162208
EPHB3	-1.94752	0.0108013	0.147744
FAP	-1.94751	3.2882e-05	0.00696786
TRPV3	-1.94589	0.0163876	0.178446
DMBT1	-1.94273	0.0277841	NA
SUCNR1	-1.93473	0.0332389	NA
C8orf46	-1.93371	0.0240484	0.214323
RGS11	-1.93335	0.00221889	0.0706974
DKK2	-1.92501	0.0187159	0.190868
CYP7B1	-1.92392	0.000497799	0.0317972
MS4A6A	-1.91748	0.000242072	0.0215787
FONG	-1.91381	0.0475841	0.293011
APCDD1L-AS1	-1.91361	0.00129223	0.0505904
CPT1C	-1.91198	0.00128578	0.0505904
PTPRE	-1.90634	1.11983e-05	0.00395175
INPP5J	-1.90379	0.00312911	0.0828841
RGS13	-1.90327	0.00878887	NA
CYTIP	-1.90154	0.00514604	0.105368
PTAFR	-1.90119	0.010967	NA
NCF1B	-1.89763	0.00552488	0.109921
NAV3	-1.89753	0.00871564	0.132771
UNC5C	-1.89227	0.00653908	0.118128
TLR7	-1.89221	0.0264244	NA
CDH11	-1.88934	0.010093	0.143478
LOC100288432	-1.88865	0.00322976	0.0842875
FLJ31485	-1.888	0.00777609	NA
PPP1R1C	-1.88541	0.0350141	0.254457
HIST1H3B	-1.88507	0.0178332	0.186356
CD2	-1.88312	0.00757183	0.126325
LINC00152	-1.88061	0.0253908	NA
KIAA1244	-1.88049	0.00617809	0.115088
CAB39L	-1.88026	0.000186447	0.0191467
NCS1	-1.87795	0.0370716	0.261987
RASSF5	-1.87794	0.0133465	0.159881
MAP6	-1.87663	0.00243959	0.0734352
TNNI3	-1.87502	0.00651931	0.117934
HIST1H3G	-1.87276	0.0342466	NA
SOHLH2	-1.86943	0.0123807	0.155888
LSAMP	-1.86582	0.0363863	0.260042
LAG3	-1.85737	0.0491248	NA
TUBA1A	-1.85634	0.000380868	0.0288927
ANLN	-1.85484	0.039298	0.267913
COLEC12	-1.85462	0.000476235	0.031474
AHR	-1.85435	0.000337666	0.0267805
CLEC11A	-1.85295	0.0122067	NA
NES	-1.85089	0.004134	0.0960931
GPR68	-1.85086	0.0389722	NA
HIST1H2AJ	-1.84939	0.040762	NA
CNTN4	-1.84829	0.00572493	0.1119
TIMD4	-1.84739	0.0328431	NA
LEPREL2	-1.84712	0.00115439	0.0487692
MS4A7	-1.84072	0.0122818	0.155561
CD44	-1.83987	0.02515	NA
HMHA1	-1.8393	0.00391984	0.0934462
CD84	-1.83831	0.00719066	0.124669
LOXL1	-1.83776	0.00352347	0.0880868
GRAMD3	-1.83369	0.000774775	0.0399353
RARRES3	-1.833	0.00277287	0.0784115
PILRA	-1.83205	0.00796116	0.12769
ELANE	-1.83037	0.03573	NA
BCO2	-1.83024	1.63374e-05	0.00486441
RAB31	-1.82917	0.000759134	0.0395579
FGF16	-1.82882	0.0127702	0.157967
LOC285540	-1.82703	0.0191398	NA
CNTN1	-1.82668	0.00771114	0.126778
TBX5	-1.82666	0.0427419	NA
FGL2	-1.82657	0.00229829	0.071805
LOC100505876	-1.82599	0.00347288	0.0873124
CLEC9A	-1.82592	0.0342511	NA
PTGFRN	-1.82569	0.000319019	0.0261282
FAT3	-1.8255	0.0288798	0.236097
RANBP3L	-1.82285	0.029133	NA
RBP1	-1.82199	0.00167796	0.0594185
GLIPR2	-1.82177	0.000170641	0.0185828
MPO	-1.82108	0.00816886	0.128602
KIAA1755	-1.81866	0.0224157	0.207684
PLEK	-1.8177	0.00332201	0.0855255
FAM20A	-1.81683	0.00794493	0.12769
ZC3H12D	-1.81648	0.0401579	NA
ADCY7	-1.81359	3.5163e-05	0.00724198
MRC2	-1.81223	0.000402432	0.0292196
MPEG1	-1.8096	0.00189284	0.0642988
FAM102B	-1.80839	0.000242457	0.0215787
ITGA4	-1.80808	0.0179039	0.186587
HIST1H3I	-1.8071	0.00274466	0.0782028
LGALS2	-1.80526	0.0128428	0.158165
MFAP2	-1.80404	0.0198425	0.196956
FN1	-1.80282	0.0397064	0.26894
OLFM2	-1.79994	0.0247674	0.218718
TACSTD2	-1.79805	0.0425593	0.276869
SLC4A11	-1.79752	0.00811444	0.128442
PTHLH	-1.79649	0.0401896	NA
LOC100506385	-1.79527	0.0281078	NA
DDAH1	-1.79468	3.70628e-05	0.0072763
PRSS35	-1.79411	0.0457209	NA
TNFAIP8	-1.79215	0.013466	0.160867
MS4A14	-1.79068	0.0412962	NA
ZBTB47	-1.7879	0.0149767	0.169917
MYOZ2	-1.78757	0.0381507	0.265632
GNAS	-1.7863	0.0199461	0.196956
THBS3	-1.78536	0.000479064	0.0315049
FNDC5	-1.78464	0.00113524	0.0481587
RGS2	-1.7845	0.00700099	0.123104
CD209	-1.78435	0.0207328	0.200132
CD33	-1.78362	0.0131511	0.159461
RECK	-1.78339	6.30988e-05	0.0096824
TFRC	-1.7833	0.00441254	0.0995239
OAF	-1.78229	0.000364196	0.0282676
TLR8	-1.78183	0.0412009	NA
TMEM161B-AS1	-1.77966	0.00482193	0.102391
ECM1	-1.77932	0.00110086	0.0475915
SNCB	-1.77831	0.0322543	0.245972
ALDH1A3	-1.775	0.000330688	0.0265945
PTPLAD2	-1.77472	0.00367681	0.0904776
SCN4B	-1.77244	0.00126423	0.0505536
TMEM176B	-1.7719	0.000810836	0.0406692
LOX	-1.77142	0.0202031	0.198034
SEMA3D	-1.77054	0.0485316	0.295439
LOXL2	-1.76932	0.00380013	0.0917392
WNK3	-1.76922	0.0282661	NA
BCL11A	-1.76722	0.0176349	NA
GPX8	-1.76435	0.000542984	0.0334048
GINS3	-1.76371	0.00776237	0.126995
VSTM2L	-1.76362	0.0488815	NA
C1QB	-1.76257	0.0145576	0.167973
XRCC4	-1.76146	0.00814441	0.12852
RASSF2	-1.7585	0.00546975	0.10915
HK2	-1.75771	0.038029	0.265317
TNFAIP8L2	-1.75648	0.00314627	0.0831737
HIST1H2AM	-1.75579	0.0147517	0.168898
PRSS12	-1.75435	0.0230311	0.210593
SPINT1	-1.75154	0.0453772	NA
ACOT11	-1.75138	0.0132449	0.159724
PDZD2	-1.74703	0.00619444	0.115088
DSCR8	-1.74603	0.0224818	NA
NIPSNAP1	-1.74428	4.56778e-05	0.00802085
KCNJ5	-1.74247	0.0185616	0.190062
ADAMTS16	-1.74222	0.028826	0.235801
CIT	-1.74186	0.0097503	0.140417
WDR62	-1.73793	0.00892471	0.134475
ADA	-1.73731	3.43651e-06	0.00191156
AIG1	-1.73373	5.40373e-05	0.00890615
FAR2	-1.73323	0.00735617	0.125785
SCRG1	-1.73074	0.0352862	NA
TIMP1	-1.7295	0.00117387	0.0492806
IGSF3	-1.72934	8.35916e-05	0.0116892
CYTH4	-1.7293	0.00585375	0.113387
TK1	-1.72766	0.0407107	NA
C16orf89	-1.72741	0.0118833	0.153872
SSC5D	-1.72731	0.00461292	0.099726
CSRNP3	-1.7269	0.026764	0.228015
ZNF883	-1.72661	0.0148105	0.169142
GRIN2D	-1.72563	0.0462906	NA
HIST3H2BB	-1.72377	0.00356317	0.0887469
PLCB2	-1.72352	0.0034502	0.087023
LILRA2	-1.71995	0.0150097	NA
FBLN7	-1.71972	0.00918952	0.136267
ZBTB7C	-1.71919	0.00951078	0.138612
GPR162	-1.71864	0.0477588	0.29368
PCDHGA5	-1.71851	0.0149759	0.169917
HR	-1.71693	0.0041755	0.0961685
CCDC88B	-1.71295	0.0418903	NA
OCA2	-1.7107	0.0293516	0.237914
TRAM1L1	-1.7095	0.00860889	0.132162
PCOLCE	-1.70322	0.0053838	0.108187
PCSK6	-1.7013	0.000218566	0.0209333
FBLIM1	-1.70025	0.032467	0.246555
F13A1	-1.69824	0.0145843	0.168135
CASS4	-1.69706	0.0180022	NA
PDE10A	-1.69423	0.00406096	0.0954468
TMEM63C	-1.69296	0.0383047	0.265632
PDGFD	-1.69082	0.00174103	0.0607099
IL18	-1.69072	0.00721497	0.124738
C1QTNF6	-1.69044	0.00520184	0.106022
CAPN6	-1.68975	0.0263426	0.225432
SLC37A2	-1.68807	0.0296052	0.238283
ARNTL2	-1.68593	0.0319648	0.245492
2018-09-01	-1.68588	0.042441	NA
COL6A2	-1.68391	0.000456843	0.0308005
CD248	-1.68118	0.00639769	0.11702
MSC	-1.67922	0.00639225	0.11702
AKR1C3	-1.67721	0.00868468	0.132611
KIAA0226L	-1.67703	0.0404836	NA
DPT	-1.67429	0.000401743	0.0292196
C1R	-1.67409	0.000959894	0.0444951
PIK3R5	-1.67381	0.0233045	0.211883
TMED3	-1.67353	0.00292631	0.0802012
IRF5	-1.67301	0.0191654	0.193979
FABP3	-1.673	0.00768348	0.126778
C3AR1	-1.67294	0.0118035	0.153733
KCNA6	-1.67217	0.0233807	0.212047
MAN1B1	-1.67206	0.027432	0.23
ZNF467	-1.67028	0.00408903	0.0959377
SCN9A	-1.66963	0.0339483	0.250251
VSIG4	-1.66736	0.0164468	0.178798
DNAJA4	-1.66605	0.00460256	0.099726
CLEC10A	-1.66595	0.0120481	0.154508
KIAA1549	-1.66324	0.0249444	0.219394
PRDM1	-1.66059	0.00743118	0.125785
CSF1R	-1.66033	0.00248283	0.0737617
CDA	-1.65948	0.0233151	0.211883
SLC22A4	-1.65918	0.0207714	0.20036
LYVE1	-1.65843	0.00457485	0.099726
KANSL1-AS1	-1.65823	0.0212792	0.203378
SPARC	-1.65763	0.0016056	0.0574658
PLTP	-1.65725	0.00707855	0.123528
RTKN	-1.65713	0.000279001	0.0234255
OSR1	-1.65482	0.0146145	0.168338
IL7	-1.65465	0.0415039	NA
EPHA3	-1.65423	0.01408	0.16442
COL8A1	-1.65421	0.000408256	0.0292196
PCDH17	-1.65347	0.00299485	0.0810979
DBNDD1	-1.65154	0.0480091	0.294418
TTC9	-1.6515	0.00598784	0.11436
REC8	-1.65111	0.0339743	0.250251
L1CAM	-1.64995	0.0177358	0.18561
NTN1	-1.64932	0.00706502	0.123453
NLGN3	-1.64556	0.0425816	0.276869
F10	-1.64532	0.00571089	0.1119
CPXM2	-1.64526	0.00906102	0.135735
AKR1C2	-1.64483	0.0213741	0.203595
RFX2	-1.64336	0.0427403	0.27706
PLEKHA4	-1.64336	0.00199131	0.0667939
OLFML1	-1.64224	0.000633366	0.0367628
MVP	-1.64098	2.93484e-05	0.00653001
TYROBP	-1.63997	0.00240089	0.0732024
SPON2	-1.63787	0.00461653	0.099726
CEACAM19	-1.63783	0.00127767	0.0505904
BLID	-1.63708	0.0162792	0.177908
IGSF6	-1.63687	0.0393943	NA
C15orf37	-1.6358	0.0380289	NA
GAS7	-1.63459	0.000334719	0.0267575
RNF207	-1.63226	0.0042232	0.0967061
GPRC5A	-1.63073	0.0353337	0.255781
PURG	-1.62927	0.010743	0.147399
DOK3	-1.62906	0.0176199	0.185017
CD4	-1.62897	0.00789413	0.127538
HSPA6	-1.62887	0.0420509	0.275591
ICMT	-1.62853	0.000221094	0.0209333
FAT1	-1.62829	0.0199065	0.196956
ADAMTS10	-1.62807	0.0024112	0.0732024
ZNF625	-1.62795	0.0306737	0.242018
FKBP10	-1.62729	0.00110156	0.0475915
PIN4	-1.62623	0.0255906	0.221985
PCDHGC3	-1.62477	0.0050022	0.104012
ANGPTL2	-1.62396	0.00138799	0.0529056
C1QA	-1.62391	0.0150057	0.170026
NCF1C	-1.62287	0.0414114	0.273685
PTGIR	-1.62228	0.0390724	0.267515
GATS	-1.62224	0.024265	0.215528
LOC283070	-1.62223	0.00505507	0.104119
CD276	-1.62055	0.0103217	0.144423
AMPD2	-1.6195	0.00766823	0.126697
POU5F1P3	-1.61935	0.0351366	NA
FSTL1	-1.61932	0.00363389	0.0899619
CAMK1D	-1.6178	0.0168512	0.17997
TRAF4	-1.61767	0.00615004	0.115088
CRIP1	-1.61571	0.0129364	0.15851
CD83	-1.61568	0.0317652	0.244418
SMPDL3A	-1.61502	0.0118797	0.153872
ADAMTS7	-1.615	0.0144997	0.167593
ARSJ	-1.61496	0.0377247	0.26437
SHC2	-1.61452	0.0213813	0.203595
HMCN1	-1.61446	0.00793039	0.12769
RTN2	-1.61275	0.0448915	0.284433
LPPR4	-1.61152	0.0379451	0.265317
CDON	-1.61095	0.00696102	0.123086
UAP1L1	-1.61085	0.00676307	0.120866
VAV1	-1.61032	0.0286831	0.235353
C1S	-1.61019	0.00044166	0.0299297
RUNX2	-1.60834	0.0488698	0.296262
PDE4C	-1.60805	0.0238697	0.213338
P2RY14	-1.60683	0.0029317	0.0802012
MSR1	-1.60682	0.0437447	0.280365
ATP8B4	-1.60621	0.0236029	0.212297
CHRD	-1.60467	0.000240015	0.0215787
FCER1G	-1.60408	0.00798532	0.12769
SMOC2	-1.60279	1.29436e-05	0.00421458
FAM176A	-1.60222	0.0436805	0.280218
HSPA7	-1.60161	0.0154544	0.172794
IKBIP	-1.60084	0.0126048	0.157118
SEMA5A	-1.60058	0.00120089	0.0500995
C1QTNF2	-1.5945	0.0149722	0.169917
MIR548I1	-1.59438	0.00443528	0.0996818
TMEM98	-1.59404	0.00227614	0.071805
TCTEX1D4	-1.5927	0.0311193	0.242775
SLC41A2	-1.59099	0.018361	0.189329
MARVELD1	-1.58963	0.0125787	0.157082
HHIPL1	-1.58752	0.0142055	0.165482
RTN3	-1.58654	0.00590128	0.113683
HOXD9	-1.58643	0.0466281	0.289528
NAT14	-1.58637	0.00270451	0.077588
ENPP1	-1.58601	0.00111356	0.0479004
TP53I3	-1.58549	0.042301	0.276393
GLT25D2	-1.58516	0.0142969	0.16586
CDYL2	-1.5836	0.0113338	0.150105
DOCK10	-1.57898	0.042725	0.27706
TRPV2	-1.57758	0.00677589	0.120933
AHNAK2	-1.57561	0.00856901	0.132162
TSPAN1	-1.57468	0.0476975	NA
GPR27	-1.57426	0.0219567	0.206134
FLJ36000	-1.57393	0.0442306	0.282121
MFI2	-1.57379	0.0301573	0.240358
PRRG3	-1.57376	0.0108865	0.147855
HAAO	-1.57236	0.015127	0.170418
SLC22A15	-1.57228	0.0389102	0.267515
VIMP	-1.56869	0.00746255	0.125786
POLR2K	-1.56716	0.0307571	0.242306
KCNAB2	-1.56684	0.0025778	0.0749753
IL10RA	-1.56617	0.0397395	0.268941
PPP1R26	-1.56608	0.00173892	0.0607099
IFI6	-1.56605	0.00126096	0.0505536
STMN3	-1.56604	0.0211871	0.202759
EML6	-1.56578	0.0285064	0.235111
ISG15	-1.56339	0.00646592	0.117763
C1QC	-1.5633	0.0440604	0.281534
NT5E	-1.56292	0.0303868	0.241008
PLXDC1	-1.56232	0.00250486	0.0739741
RAB42	-1.56221	0.0246264	0.217868
PTPRD	-1.56005	0.0435957	0.280191
P2RY13	-1.55908	0.0354998	0.256174
CD14	-1.55886	0.010224	0.144282
NCKAP1L	-1.55868	0.0352325	0.255585
ACSS1	-1.55839	0.0152522	0.171313
GDF11	-1.55797	0.0261966	0.22447
LSP1	-1.55744	0.000766042	0.0396382
AGTPBP1	-1.55666	0.000813384	0.0406692
TRIM66	-1.55368	0.000902396	0.0435478
CCDC89	-1.55349	0.0251872	0.219947
RPS6KA1	-1.5533	0.0259065	0.223198
ALOX5AP	-1.55317	0.00619837	0.115088
GPNMB	-1.55275	0.0125188	0.156485
FBLN1	-1.54954	0.0181555	0.188034
RSPO3	-1.54823	0.0403603	0.26981
EMILIN2	-1.54674	0.0218825	0.205871
GLT8D2	-1.54633	0.00387081	0.0929413
PAG1	-1.54459	0.00388128	0.0930252
TRPM2	-1.54331	0.0280476	0.233101
RCN3	-1.5425	0.00149894	0.0549749
NID2	-1.54122	0.0167071	0.179943
NINJ2	-1.54014	0.0461607	0.28835
DOCK2	-1.53964	0.0321451	0.245502
FSTL3	-1.53813	0.0114951	0.151879
STXBP2	-1.53799	0.0247318	0.218655
PCDHB15	-1.53786	0.0048787	0.102842
FADS2	-1.53538	0.0143383	0.165989
DCN	-1.53523	0.00207395	0.0680277
TMEM54	-1.534	0.00302346	0.0812136
MFAP4	-1.53394	0.00742745	0.125785
AIF1	-1.53393	0.01321	0.159528
PTK7	-1.53299	0.0382362	0.265632
LILRB5	-1.53171	0.0213999	0.203627
BCHE	-1.53166	0.00816308	0.128602
MAMDC2	-1.53126	0.00866072	0.132493
NMI	-1.53107	0.0164464	0.178798
SHC3	-1.53079	0.032978	0.247694
GSG2	-1.52995	0.0408729	0.271638
S100A6	-1.52965	0.0457202	0.286422
HAVCR1P1	-1.52825	0.0477224	0.293592
MAPK10	-1.52744	0.0391293	0.267515
ISLR2	-1.52659	0.041671	0.274758
SLC16A2	-1.52489	0.00319467	0.0839292
GPSM2	-1.52418	0.00888396	0.134164
CPA3	-1.52298	0.0161582	0.177639
MYADM	-1.52289	0.01294	0.15851
MST1R	-1.52227	0.0406682	0.271211
TBXA2R	-1.52197	0.00587762	0.113391
LAPTM5	-1.52106	0.0279757	0.232695
RCOR2	-1.52023	0.00417501	0.0961685
PRTFDC1	-1.51839	0.0196509	0.19613
NPTXR	-1.51813	0.0341128	0.251051
SAMD14	-1.51682	0.0161672	0.177639
VASP	-1.51675	0.019303	0.19434
BCDIN3D-AS1	-1.51561	0.00231317	0.071805
SLC9A1	-1.51412	0.00246372	0.0737617
REM1	-1.51288	0.00744344	0.125785
C1QTNF3	-1.51246	0.0070566	0.123453
NCF2	-1.50952	0.0227071	0.208774
TGFB2	-1.50791	0.00639884	0.11702
ACOX2	-1.50731	0.025486	0.221553
HGF	-1.50631	0.0417838	0.275002
GLTPD1	-1.50542	0.00525498	0.106942
MEDAG	-1.50373	0.00559232	0.110886
KDELC1	-1.50322	0.0412365	0.272799
KCND2	-1.50219	0.0374738	0.263303
THBS2	-1.5018	0.0437664	0.280365
PCGF2	-1.50162	0.0176274	0.185017
LOXL3	-1.50069	0.0235816	0.212297
ZNF385B	-1.49997	0.0224825	0.207684
MYOF	-1.49891	0.0286603	0.235311
CDC42EP5	-1.49854	0.028556	0.2352
C4orf33	-1.49792	0.0448104	0.284433
CPQ	-1.49663	1.2039e-05	0.00412104
COL18A1	-1.49654	0.0127962	0.158029
ETV1	-1.4963	0.0155817	0.173346
SLC25A15	-1.49569	0.0390956	0.267515
RAD54B	-1.49482	0.00766266	0.126697
BLOC1S2	-1.49399	0.00258528	0.0750294
NDRG4	-1.49378	0.0167848	0.179943
PDGFRL	-1.49169	0.00787715	0.127538
DANCR	-1.49116	0.00250297	0.0739741
ME2	-1.49111	0.00740402	0.125785
NCF4	-1.49075	0.044162	0.281818
MFHAS1	-1.49032	0.0123511	0.155888
MGC72080	-1.48989	0.00455939	0.099726
FBN1	-1.48918	0.0146781	0.168344
MRC1	-1.48898	0.016639	0.179943
CHD3	-1.48756	0.00248217	0.0737617
COL6A1	-1.4851	0.00904951	0.135735
ST3GAL4	-1.48387	0.0108387	0.147855
DNM1	-1.48168	0.0333069	0.249046
E2F3	-1.48165	0.0172057	0.182154
SPI1	-1.48147	0.0339854	0.250251
HAS2	-1.48144	0.0296968	0.238396
PDLIM4	-1.47998	0.020603	0.199601
TYMP	-1.47902	0.0467712	0.289877
HIST1H4F	-1.4787	0.0474553	0.292623
NCKAP5L	-1.47853	0.000813369	0.0406692
GOLM1	-1.4765	0.00697473	0.123104
PREX1	-1.47413	0.00450876	0.099726
MAP4K4	-1.47367	0.000514917	0.0324252
SOX12	-1.47359	0.0456568	0.286261
FREM1	-1.47349	0.0453695	0.285884
IFFO2	-1.47119	0.027879	0.232374
VAV2	-1.4711	0.00618977	0.115088
OSGIN2	-1.47045	0.000753778	0.0395579
SNORA36C	-1.4702	0.0459811	0.287651
GNB4	-1.46831	0.00876608	0.133288
ABCB8	-1.46682	0.00633331	0.11702
ANTXR1	-1.46445	0.00770423	0.126778
RERG	-1.46364	0.0230054	0.210502
ATP9A	-1.46356	0.0281232	0.233101
CXCR4	-1.46251	0.0172338	0.182306
RELL1	-1.46223	0.0464948	0.289167
SHF	-1.46188	0.0462069	0.28835
BMPER	-1.46181	0.0312458	0.242942
TES	-1.46151	0.0218242	0.205467
GNB5	-1.46077	0.0216561	0.204889
MAPRE3	-1.45925	0.00378479	0.0917392
APOPT1	-1.45819	0.0336899	0.250021
GLIS2	-1.45709	0.0127488	0.157967
EML2	-1.45663	0.0232209	0.211626
C15orf59	-1.45591	0.0433602	0.279372
FSCN1	-1.4554	0.0209196	0.201208
KALRN	-1.45519	0.0475639	0.293011
DAB2	-1.45503	0.0213651	0.203595
WBP5	-1.45408	0.000736841	0.0395179
SPATA20	-1.45385	0.0316302	0.243941
ARRDC3	-1.45292	0.00380006	0.0917392
CCDC144A	-1.45175	0.0275948	0.230532
FAM177A1	-1.45142	0.0146578	0.168344
PCDHGB5	-1.4496	0.00865765	0.132493
SLCO5A1	-1.44938	0.00300427	0.0811884
TSHZ3	-1.44921	0.0316276	0.243941
MYH10	-1.44915	0.0333461	0.249046
LPAR1	-1.44851	0.0249882	0.219613
MAST3	-1.44823	0.0232423	0.211626
RRBP1	-1.44819	0.000268077	0.0230892
CCDC176	-1.44684	0.0399279	0.268984
A2M-AS1	-1.4465	0.0192106	0.194211
REP15	-1.44581	0.0417962	0.275002
JAK2	-1.44424	0.00795908	0.12769
TMEM136	-1.44394	0.0240993	0.214542
TGFB1	-1.44368	0.0106244	0.147024
CFL2	-1.443	0.00231712	0.071805
CC2D2A	-1.44158	0.00174882	0.0607099
TNXB	-1.43979	0.00994441	0.14226
DECR1	-1.43954	0.00799065	0.12769
EMP3	-1.43864	0.0252421	0.220249
KLHDC8B	-1.43832	0.0124389	0.155925
SPIRE1	-1.43777	0.00610898	0.115088
TENM1	-1.43601	0.0366975	0.261151
PLAUR	-1.43597	0.034476	0.251775
DUSP19	-1.43516	0.0228627	0.209771
DBN1	-1.43427	0.00749348	0.125834
KCTD17	-1.43317	0.0376589	0.264186
FAM92A1	-1.43232	0.00753758	0.126156
CMTM6	-1.43155	0.00494655	0.103505
CALD1	-1.43121	0.0496086	0.298081
TP53INP2	-1.43097	0.026705	0.227658
ZNF486	-1.42957	0.026045	0.223855
AKAP6	-1.4295	0.000495482	0.0317972
HTRA1	-1.42902	0.0100328	0.142944
LGMN	-1.42786	0.00139828	0.0530315
PLXNC1	-1.42741	0.00269819	0.077588
MMP2	-1.427	0.0301547	0.240358
ANKRD13D	-1.42689	0.0222561	0.207425
MAP3K10	-1.4249	0.00167386	0.0594185
CES2	-1.4236	8.49075e-05	0.0116892
PDGFRB	-1.42206	0.00832815	0.130188
PGRMC2	-1.42171	0.00367275	0.0904776
GGT5	-1.42136	0.0287424	0.235405
KIAA0930	-1.42075	0.0139357	0.163195
TOMM40L	-1.42038	0.00564433	0.111138
ZNF385D	-1.42012	0.00616043	0.115088
SLC35B3	-1.41794	0.0106736	0.147121
ORAI2	-1.41754	0.0391161	0.267515
FAM105A	-1.41727	0.0366247	0.261151
HOXD8	-1.41692	0.00130751	0.0510386
CCDC159	-1.41681	0.0110602	0.148545
CATSPER2P1	-1.4163	0.0152097	0.171061
LYPLA1	-1.41469	4.59798e-05	0.00802085
GALNTL1	-1.41458	0.0487918	0.296262
TRIL	-1.41424	0.0435394	0.280191
GSTZ1	-1.41377	0.000935204	0.044239
RAB11FIP3	-1.41325	0.000209659	0.0208877
ZC3HAV1L	-1.41299	0.0115318	0.151879
CBR1	-1.4129	0.00129169	0.0505904
MDK	-1.4125	0.0496132	0.298081
RAB40B	-1.41197	0.00765482	0.126697
PCDHB13	-1.41175	0.0316116	0.243941
MAP7D3	-1.41173	0.00285447	0.0793901
PARP3	-1.41003	0.000799333	0.0405745
GSR	-1.40993	0.00721787	0.124738
SCD5	-1.40918	0.0367306	0.261243
CD9	-1.40867	0.0222029	0.207424
ARHGAP21	-1.40849	0.000531669	0.0331672
EBF2	-1.40842	0.00642251	0.117292
TANC2	-1.40825	0.0050473	0.104119
PPIP5K2	-1.40633	0.0097094	0.140134
LARP1B	-1.40576	0.000265709	0.0230721
MB	-1.40477	0.00344804	0.087023
PHTF2	-1.40461	0.01015	0.143692
FAM171B	-1.40429	0.0289708	0.236502
HSD11B1L	-1.4033	0.0367799	0.261315
LGALS3BP	-1.40286	0.0238746	0.213338
JAZF1	-1.40222	0.00426482	0.0971592
LEPREL4	-1.40191	0.00743161	0.125785
HYAL1	-1.40107	0.0214478	0.203793
IL16	-1.39973	0.0229049	0.210014
HIST1H3A	-1.39861	0.0314681	0.243819
NPDC1	-1.39829	4.09299e-05	0.00758909
TAS1R3	-1.39755	0.0322986	0.245972
PDGFRA	-1.3967	0.000744366	0.0395179
C10orf131	-1.3959	0.0366546	0.261151
LMBRD2	-1.39507	0.00213587	0.0688741
ITFG2	1.39591	7.45409e-07	0.00110569
ECHDC3	1.39669	0.028454	0.235063
ZNF227	1.39838	0.000714454	0.0393474
FAM65C	1.39894	0.0270378	0.228896
SNORD17	1.39965	0.00555604	0.110377
TMF1	1.39992	0.0237495	0.212647
ZNF582	1.40344	0.0480392	0.294418
L3MBTL4	1.40356	0.0243775	0.216096
SNORA9	1.4073	0.000709899	0.0393474
SLC31A2	1.40783	0.0285587	0.2352
SLC38A2	1.40968	0.0102065	0.144186
UPF3B	1.40995	2.31329e-05	0.00566846
SNORA65	1.41094	0.00243825	0.0734352
RPS21	1.41243	4.02276e-05	0.00758909
SNORD15A	1.41337	0.00158378	0.0569903
AGAP5	1.41413	0.0453983	0.285884
GDPD1	1.41512	0.0490725	0.296702
SNORD94	1.41526	0.00584025	0.113387
PPP1R15A	1.41616	0.026962	0.228853
EMC1	1.41636	0.000172432	0.0185828
ELP2	1.41689	1.37228e-05	0.00436188
SPTB	1.41699	0.00101977	0.0460468
PER2	1.41853	0.00869176	0.132611
SIPA1L2	1.41958	0.0394306	0.26816
SLC39A14	1.42027	0.0321126	0.245502
NUDT4	1.42142	0.000177738	0.0185828
MAFB	1.42237	0.0286092	0.235311
SNORA67	1.42302	5.53608e-05	0.00901301
CYP4Z1	1.42537	0.0116399	0.152196
H3F3B	1.42784	0.00071621	0.0393474
TMEM201	1.42891	0.0151243	0.170418
EEF1B2	1.42914	0.00142214	0.0534804
SNORA52	1.42963	2.37783e-06	0.00191156
C9orf156	1.4332	4.08146e-05	0.00758909
LOC158376	1.4336	0.0202387	0.198034
ZNF606	1.43545	0.00470466	0.100979
PARD6G	1.43558	0.0333678	0.249046
ARNTL	1.4358	0.0477215	0.293592
LOC150776	1.43872	0.00790066	0.127538
STRA13	1.44002	0.000423381	0.0292857
FAM50B	1.44056	0.0023182	0.071805
C5	1.44092	0.0327703	0.247286
CA8	1.44342	0.0338163	0.250021
FTSJD1	1.44347	0.0018856	0.0642164
CNOT8	1.44367	0.0200306	0.197331
PINX1	1.44376	5.89725e-05	0.00926215
ZNF211	1.44384	0.00789874	0.127538
ZNF274	1.44421	0.000829143	0.0408452
TMEM52	1.44679	0.00359636	0.0894068
DAPK3	1.44771	0.00101376	0.0460331
FAM100B	1.45255	0.000175194	0.0185828
KCNQ4	1.45356	0.0296189	0.238283
ZNF16	1.45681	0.000116578	0.0146822
SPSB1	1.45856	0.00147072	0.0543145
TAF9B	1.45866	8.37791e-06	0.00328956
RBM15	1.45879	0.0302621	0.240476
H1FX	1.45885	3.05843e-05	0.00669345
SEC14L1P1	1.46534	0.0190178	0.192631
ZNF226	1.46864	0.00971842	0.140134
C7orf29	1.46884	0.0427609	0.27706
ZNF568	1.46888	0.000908288	0.0435729
PEG10	1.47359	0.0146689	0.168344
NR1D1	1.47376	0.0387145	0.266909
BUD13	1.47903	2.43594e-05	0.00566846
IRS2	1.48118	0.00772079	0.12678
ABHD3	1.48183	0.00988205	0.141773
HNRNPA3	1.48418	2.86534e-06	0.00191156
KLF10	1.4849	0.00252622	0.074121
ST3GAL3	1.48617	0.0136499	0.161835
ZFHX3	1.48775	0.000220758	0.0209333
MOSPD2	1.48979	0.000409148	0.0292196
TP63	1.48992	0.00491858	0.103397
FGFRL1	1.49262	0.0483555	0.295254
SLC16A14	1.49654	0.0195424	0.195549
ING1	1.49716	0.000538014	0.0333475
SSPN	1.49822	2.50516e-05	0.00566846
RBFOX1	1.49869	7.29919e-07	0.00110569
DLEU2	1.5005	0.0148375	0.1693
IL6R	1.50095	0.0312983	0.243209
EIF4EBP3	1.50194	0.000715896	0.0393474
KLRAP1	1.50654	0.034324	0.251373
SNORA2B	1.50764	0.00488279	0.102842
FAIM	1.51029	0.000819682	0.0408312
SESN1	1.51077	0.000911223	0.0435729
ELL2	1.51301	0.00196169	0.0663003
CHAF1B	1.51728	0.0049761	0.103961
FLJ35390	1.51896	0.0131868	0.159528
GALNTL2	1.5221	0.0231601	0.211381
SLC1A1	1.52293	0.00213553	0.0688741
SCARNA6	1.52298	0.000348511	0.0272083
SCARNA5	1.52592	3.64626e-05	0.00726531
ZNF229	1.52669	0.00291845	0.0802012
SNTG2	1.52876	0.0391055	0.267515
LINC00471	1.53005	0.0354862	0.256174
ZNF587B	1.53045	0.00904738	0.135735
ZNF418	1.53182	0.00807943	0.12842
BAALC	1.53288	0.0237083	0.212606
SCARNA2	1.53331	5.27415e-06	0.00251464
OLFM1	1.53351	0.0120442	0.154508
HIST1H1C	1.53436	1.25433e-05	0.00418633
AKR1E2	1.54357	0.00337939	0.0860971
WDR66	1.54524	0.0401131	0.269526
ZIK1	1.54774	0.0131506	0.159461
LOC100240735	1.54792	0.000999199	0.0457944
RNU12	1.56206	0.0188172	0.191324
KRBA1	1.56243	0.00104053	0.0467713
MAPK13	1.56424	0.0202484	0.198034
CCDC68	1.56982	0.00251013	0.0739741
SKP1P2	1.57276	0.0150412	0.170026
ABRA	1.57643	0.0169715	0.18039
NKG7	1.57874	0.0495685	0.298081
DACT1	1.57882	0.0414392	0.273732
SNHG5	1.58669	0.0167933	0.179943
PKD1L2	1.58965	0.0484199	0.295297
LOC389705	1.59113	0.033544	0.249477
ZNF419	1.59172	0.0167378	0.179943
EZH2	1.59191	0.00398339	0.0939546
PDE1B	1.59221	0.0392954	0.267913
IRX5	1.60318	7.71447e-05	0.0111944
FLRT3	1.61142	0.0169557	0.18039
SNORA46	1.61202	2.39859e-05	0.00566846
AASS	1.61457	0.00237234	0.0728063
KCNA5	1.61458	0.0106657	0.147121
LMOD1	1.61832	0.00123568	0.0505536
C15orf57	1.6189	3.17426e-06	0.00191156
ZNF547	1.6217	0.00745599	0.125786
ZNF433	1.62945	0.00775385	0.126995
TXNIP	1.63113	0.000143189	0.0166224
CYP4B1	1.63643	0.00866416	0.132493
GPR137C	1.63673	0.0207287	0.200132
SOX18	1.6414	0.00396943	0.0939546
ZNF256	1.65846	2.47847e-06	0.00191156
PAK6	1.66779	0.02249	0.207684
C6orf141	1.67084	0.0291669	0.237385
FGFR1	1.67319	0.0404785	NA
CNTFR	1.67942	0.00841877	0.131144
C5orf54	1.68247	0.0072895	0.125567
LDHAL6B	1.68641	0.0109841	0.148135
CPAMD8	1.68847	0.00270831	0.077588
TMEM232	1.69178	0.0014728	0.0543145
MT1M	1.69421	0.0220517	0.206565
SYN2	1.70002	0.0131837	0.159528
LOC100130691	1.70038	0.0255076	0.221553
OCLN	1.71388	0.0326679	NA
AEN	1.71718	3.5803e-05	0.00724198
ENOX1	1.73479	0.0328998	0.247583
FZD5	1.73528	1.63969e-05	0.00486441
CCDC11	1.73612	4.7233e-05	0.00808411
EPB41L4B	1.73637	0.0412254	0.272799
STOX1	1.73799	0.0305051	0.241401
CPM	1.74108	0.0225801	0.20818
MT1G	1.74126	0.0162285	0.177908
ODF3L2	1.76566	0.0240355	0.214323
C11orf92	1.77114	0.00304679	0.0815124
PLXNA4	1.77574	0.00678978	0.121019
TPM3P9	1.77818	0.00644758	0.117589
FABP7	1.78526	0.0481013	0.294418
TMEM184A	1.78929	0.000626563	0.0365267
LOC286094	1.79103	0.0295354	0.238283
GTF2H2B	1.79163	0.0192537	0.194283
GMNC	1.79554	0.0467597	NA
SPATA22	1.79558	0.00529996	0.107366
FOXO3	1.8042	4.20771e-05	0.00769492
MYH15	1.80497	0.0462154	0.28835
PRF1	1.80925	0.0188596	0.19161
ARMCX4	1.8127	0.0427902	0.27706
BCL6	1.82107	2.35595e-05	0.00566846
GGT7	1.8264	8.73718e-08	0.000233283
ACVR1C	1.82941	0.0162565	0.177908
EYA2	1.83104	0.0205659	0.199386
FAM115C	1.83489	0.0392911	NA
ARID5A	1.84876	0.000419668	0.0292196
C19orf80	1.85797	0.0209762	0.201462
AOC2	1.86542	0.0315239	NA
ART3	1.86737	5.6528e-06	0.00260224
MGST1	1.8674	0.0300925	0.240213
MT1E	1.86799	0.00298424	0.0810766
KRT7	1.86948	0.0495754	NA
CXorf57	1.87022	0.00200432	0.0668279
LMO3	1.87205	0.00923804	0.136267
PIK3R1	1.87393	0.0032935	0.0854198
PDK4	1.87986	0.00201617	0.066955
RAB38	1.8979	0.0160171	0.176572
B3GALT1	1.90043	2.39789e-05	0.00566846
TRHDE	1.91505	0.00902607	0.135735
CITED2	1.91561	0.02528	0.220304
MAOA	1.92394	0.00241968	0.0732487
GDPD3	1.93766	0.0015538	0.0565211
CLVS2	1.94964	0.0337007	NA
PC	1.95288	0.0457876	NA
KCNQ5	1.95511	6.6858e-06	0.00278923
OSTN	1.95851	0.0128782	0.15831
WFDC1	1.96106	0.0443305	0.282488
FABP4	1.97643	0.0198294	0.196956
PDE8B	2.00706	0.0278188	0.232114
MARVELD2	2.01368	0.00710107	0.123597
LOC100288637	2.01898	0.000184121	0.0190544
MT1X	2.02325	0.000745956	0.0395179
ANKRD26P3	2.02409	0.0295322	NA
KHDRBS2	2.0451	0.00680208	0.121077
KBTBD8	2.04804	0.000133465	0.0157706
KCNMB1	2.04821	0.0373948	0.263133
PTTG1	2.05352	0.0103509	NA
PAPPA2	2.07291	0.0392187	NA
OR2A42	2.08192	0.0370179	NA
PDE3B	2.09194	0.0132163	0.159528
C4orf22	2.09767	0.0204878	NA
PLAG1	2.13991	0.000703998	0.0393238
PXDNL	2.1448	0.00405145	0.0953913
GLUL	2.15567	1.99505e-05	0.00532679
VWA3B	2.15706	0.0104113	NA
COL28A1	2.16781	0.00284226	0.0793901
PLIN1	2.19713	0.0472281	0.291896
PTGER3	2.21307	0.0202265	0.198034
MT1A	2.21834	0.0194712	0.195444
WNT9A	2.22991	6.96056e-05	0.0105595
FOXO1	2.24801	4.81291e-06	0.00237972
FRRS1L	2.32445	0.0103314	0.144423
XIRP1	2.33082	0.00288464	0.0797308
GREM2	2.33602	0.023587	0.212297
ARG2	2.33675	0.0418831	0.275302
GDNF	2.35548	0.0139077	NA
SLC16A6	2.3576	0.0012744	0.0505904
ADH1B	2.36149	0.000694556	0.0389882
SOCS2	2.36336	0.0208324	NA
PFKFB3	2.39313	0.00135529	0.0524251
TIMP4	2.40114	1.01403e-05	0.00386778
OR1E2	2.45183	0.00776821	NA
LOC642846	2.49329	0.0130793	0.159388
ITIH3	2.5167	0.0217807	0.205203
ITLN1	2.51728	0.040573	NA
TUSC5	2.56547	0.0124174	0.155925
SYT6	2.58152	0.00400001	NA
HCN1	2.6985	0.000657427	0.0378304
SLC44A5	2.77277	0.0440496	0.281534
KIAA1239	2.79414	0.0159691	NA
AZGP1	2.82969	0.0224952	0.207684
EIF4EBP1	2.88124	6.65422e-11	8.88338e-07
SLPI	2.97222	0.00700818	0.123104
GRIK2	3.01082	0.000401484	0.0292196
TRHDE-AS1	3.05001	0.000155972	0.017646
IER5	3.10248	0.00154361	0.0564581
COBL	3.11416	0.000281536	0.0234906
CISH	3.14056	0.000726163	0.0394077
CDCA7	3.15911	2.7208e-06	0.00191156
ATF3	3.27839	0.00594567	0.113717
CALML6	3.34722	0.000370974	0.0286272
CIDEA	3.41735	0.00147089	0.0543145
SLC7A10	3.79447	0.000325919	0.026466
SLC19A3	3.89261	0.00108043	0.0475915
NPTX1	3.93538	0.0030349	0.0813573
OTUD1	4.02947	0.00138523	0.0529056
ACSM3	4.07883	0.000434742	0.0297083
RBP4	4.30336	0.000216558	0.0209333
GYG2	4.46782	0.000436166	0.0297083
SBK2	4.61831	0.00143608	0.053853
CYP1A1	6.32243	0.00156679	0.0565315
PCK1	6.64094	3.1174e-06	0.00191156

## Sheet: Table S2
Supplementary Table S2. Differentially expressed genes in adipose tissue related to Figure 3
Gene	Linear Fold change	pvalue	padj
IGLL5	-6.93174	0.00139809	0.0101214
FOSB	-5.56595	0.019496	0.0647094
HP	-4.62078	0.00635445	0.0289528
POU2AF1	-4.19363	3.34e-05	0.000846309
CH25H	-4.09217	4.63e-05	0.00103837
AQP4	-3.75288	0.000471283	0.00489406
OSM	-3.60605	0.000495226	0.00506126
IL8	-3.46613	0.0139015	0.050833
TIMD4	-3.42555	0.00220734	0.0137527
CLEC4G	-3.23856	0.000672412	0.00622104
IGJ	-3.23222	0.00310942	0.0177203
CD79A	-3.16528	0.00142948	0.0102259
CCL22	-3.12134	0.00947383	0.0385865
NR4A2	-3.08656	0.000325873	0.00379259
AREG	-3.04387	0.0234557	0.0743433
CHI3L1	-3.01971	0.0127988	0.0481173
EGR2	-2.99387	0.00819025	0.0346963
ALPL	-2.9842	0.000267441	0.00333759
LSAMP	-2.97176	2.22e-06	0.000140443
SFRP2	-2.97026	0.000818915	0.0070706
PCLO	-2.9696	7.88e-05	0.00145352
NECAB1	-2.96243	0.0326981	0.094538
CXCL2	-2.9405	0.0155663	0.05501
MZB1	-2.87865	0.00285244	0.0166453
NR4A3	-2.77409	0.00361025	0.0196962
IL6	-2.75806	0.0314588	0.0920515
IL1RN	-2.75526	0.0211112	0.0687965
NFKBIZ	-2.70369	0.00254464	0.0152862
CD38	-2.6893	5.33e-07	5.29e-05
DBNDD1	-2.66524	0.000516995	0.00519733
COL4A4	-2.66036	0.00538975	0.0257829
EGR3	-2.65312	0.0318991	0.0929538
SLC24A6	-2.63488	3.35e-09	2.4e-06
OCRL	-2.62678	1.94e-07	2.72e-05
SDPR	-2.60554	6.76e-08	1.2e-05
B4GALT6	-2.57056	0.000106407	0.00178561
MYCL1	-2.56354	0.00122052	0.00922935
MOXD1	-2.55433	0.00531645	0.0255681
CD1C	-2.55176	0.000967806	0.00794179
DUSP1	-2.50618	0.0147007	0.0529538
THY1	-2.49659	6.51e-05	0.0012734
MS4A6E	-2.47708	0.0438673	0.116967
SOCS2	-2.4715	0.00765543	0.0329938
RYR1	-2.45912	1.29e-05	0.000440096
MT1A	-2.45706	0.0358995	0.101534
KLF4	-2.44981	0.00149159	0.0104867
THEMIS2	-2.44517	0.000132419	0.00210242
JUNB	-2.44488	0.0181578	0.061663
HIST1H2BF	-2.44367	1.03e-08	4.02e-06
LILRA5	-2.43333	0.00232059	0.0142415
SIGLEC1	-2.4303	4.56e-05	0.00102969
SFTA1P	-2.41562	2.1e-05	0.000614106
CCL4	-2.41515	0.00698218	0.0309924
P2RY10	-2.41137	8.1e-05	0.00148167
C1orf233	-2.38953	0.000313314	0.00370693
KRT16	-2.38933	0.0488147	0.12597
CXCR2	-2.38196	0.00475408	0.0237367
FAM43B	-2.35801	0.00299934	0.0172529
CCL18	-2.35337	0.0420911	0.113545
CCL8	-2.34745	0.00199627	0.012788
FAM120AOS	-2.33369	1.6e-06	0.000117852
PTGS2	-2.306	0.0248575	0.0777278
COL1A1	-2.26972	0.021908	0.0707325
CXCL1	-2.26695	0.0103496	0.0412704
S100P	-2.25986	0.0309817	0.0910777
CXCR4	-2.24346	0.00134206	0.00989903
RNF122	-2.23599	0.000260297	0.00327781
PHLDA2	-2.23065	0.000163947	0.00239664
TBC1D2B	-2.22484	6.56e-09	3.26e-06
HSD11B1	-2.22436	0.0064474	0.0292421
MYLK	-2.22345	0.001205	0.00913876
ERRFI1	-2.19883	0.00278917	0.0163723
TPD52L1	-2.19181	2.17e-07	2.89e-05
NETO2	-2.17137	6.15e-05	0.0012349
KIAA0226L	-2.14978	2.03e-06	0.000135715
HIST1H3F	-2.13876	0.00172344	0.0115625
C11orf96	-2.13585	0.00290116	0.0168534
TCTEX1D4	-2.13378	9.64e-05	0.00167711
MT1JP	-2.13117	0.00842415	0.0353856
MT1L	-2.12562	1.39e-08	4.8e-06
SLC4A3	-2.11698	0.000125502	0.00202498
MT1E	-2.10956	0.0011361	0.00879627
PLD4	-2.10357	0.0104636	0.0416479
ELN	-2.08251	0.000652298	0.00611465
SFRP4	-2.07137	0.0134122	0.0495903
PEG3	-2.06986	0.00586973	0.0272836
CCR5	-2.0655	0.0172339	0.0593846
TREM1	-2.06502	0.0390195	0.1076
ENPP2	-2.06493	4.31e-06	0.000216386
DPYSL4	-2.06377	0.0182943	0.0619961
TMEM221	-2.05182	0.00138962	0.010085
LMAN1	-2.04795	2.27e-08	5.86e-06
CLEC12A	-2.03794	0.0419624	0.113363
MGRN1	-2.01637	2.34e-07	3.08e-05
CHAC2	-2.0068	3.5e-07	4.07e-05
MELK	-1.99992	0.0011335	0.00878751
FPR3	-1.99668	0.0111373	0.0434797
SCIMP	-1.99457	0.0052591	0.0254059
COL6A1	-1.99251	4.33e-07	4.81e-05
SLC36A1	-1.98968	2.66e-05	0.000719349
ADCY7	-1.9874	1.01e-05	0.000378515
RAB42	-1.98417	0.00046345	0.00482436
DACT2	-1.98397	0.0352434	0.100159
UBE2C	-1.98198	0.0355938	0.10091
PSD4	-1.97566	0.00124582	0.00937122
MKI67	-1.97426	0.0317133	0.0926496
TUBB2B	-1.97361	0.0217589	0.070339
CCNB2	-1.96465	0.0136219	0.0500802
LILRB3	-1.96319	0.00592454	0.0274494
ADAMTS16	-1.96312	0.0170253	0.0588703
PHLDA1	-1.96149	0.00380436	0.020414
SKA3	-1.9564	0.048696	0.12578
HIST1H2BC	-1.95061	1.18e-08	4.36e-06
CYSLTR1	-1.94943	1.07e-05	0.000395739
CSDE1	-1.94938	0.00118551	0.00904943
FAIM2	-1.94527	0.00699142	0.0310121
F2R	-1.93761	0.000193642	0.00265059
HBEGF	-1.93503	0.00910824	0.0374409
C3orf58	-1.93324	3.3e-06	0.000182414
IGF2	-1.93296	0.0168198	0.0584413
VMO1	-1.93268	0.00606023	0.0278482
HIST1H3B	-1.92888	0.0461886	0.121402
WNT2B	-1.92879	0.00569213	0.0267081
ANLN	-1.9241	0.0352511	0.100159
IFI30	-1.92151	0.0278881	0.0843028
KIF22	-1.91936	1.32e-05	0.000445974
LZTR1	-1.91784	8.59e-06	0.000339147
TBX5	-1.91431	0.000231169	0.00302937
HDAC9	-1.91232	0.0035941	0.019649
NRP2	-1.90764	4.54e-06	0.000223829
ADAMTS18	-1.9053	0.0148101	0.0532058
ST6GALNAC6	-1.8978	2.07e-07	2.82e-05
CYTIP	-1.89478	0.00374969	0.0202515
ABL2	-1.89239	0.000190934	0.00264156
ANXA2	-1.88969	5.42e-06	0.000248345
ABCC9	-1.88481	6.08e-08	1.14e-05
PIK3R5	-1.88442	0.00167881	0.0113754
HIST1H3J	-1.88162	0.0360272	0.101784
B3GNT5	-1.88056	0.0191379	0.0638986
CLCN3	-1.87949	0.000268547	0.00334296
DIO2	-1.87656	0.036331	0.102369
KIF5B	-1.87579	1.16e-05	0.000415037
CXorf21	-1.87113	0.00441086	0.0226114
CD84	-1.86593	0.00511227	0.0249016
C1QTNF6	-1.86343	0.000575244	0.00559974
COL1A2	-1.86014	0.00583501	0.0271809
DOCK11	-1.85627	1.24e-05	0.000432617
KRT222	-1.85256	0.00537511	0.0257351
MDH1	-1.85229	0.000970688	0.00794555
PEG10	-1.8493	0.00413468	0.0216777
CDH6	-1.84749	0.00330415	0.0185515
PQLC2	-1.84489	7.91e-06	0.000321028
RFC5	-1.84233	5.35e-05	0.00113154
PCSK6	-1.83896	0.00348475	0.0192474
CCDC14	-1.83859	2.57e-05	0.000699423
FAM189B	-1.8378	5.9e-05	0.00120773
GPR183	-1.83387	0.0188067	0.0631851
MXRA5	-1.83157	0.00561148	0.026414
GCLC	-1.83144	0.000146044	0.00222695
NNAT	-1.82967	0.00852501	0.035635
DIP2B	-1.82957	2.58e-06	0.000155855
CD14	-1.82818	0.00108454	0.00855178
SIGLEC9	-1.82658	0.0142261	0.0516687
GPR82	-1.82608	0.00092213	0.0077141
BROX	-1.8229	2.67e-06	0.000158578
TAGAP	-1.8217	0.0106197	0.0421133
CHMP2B	-1.82115	1.46e-05	0.000476811
APLNR	-1.81727	0.0146009	0.0526758
SEC24D	-1.81701	0.000106517	0.00178561
UBLCP1	-1.81164	0.000406214	0.00438046
G6PC3	-1.80851	1.79e-06	0.000122629
PDK4	-1.80775	0.00319321	0.0181178
FAM20C	-1.80627	0.00929714	0.0380854
GATS	-1.80319	0.00482408	0.0239037
USP53	-1.8031	0.00136254	0.00999866
C12orf4	-1.79959	2.54e-05	0.000695968
STX12	-1.7967	6.44e-06	0.000279988
TMEM11	-1.79429	1.67e-05	0.000527378
MPZL3	-1.79381	0.0055309	0.0261704
SLC16A3	-1.79329	0.000378795	0.00417321
ADAMTS1	-1.79254	0.0393637	0.108315
MYADM	-1.79232	0.000200726	0.00271305
ADAM12	-1.79214	0.00168899	0.0114203
PLEKHA3	-1.79018	8.07e-05	0.0014793
GOLGA3	-1.78839	5.62e-06	0.000252784
GPR132	-1.78811	0.000276153	0.00341108
PLAUR	-1.78642	0.00434275	0.0223339
TMEM194A	-1.78565	2.68e-05	0.00072168
CBX1	-1.78545	0.000526672	0.00526858
PHLPP2	-1.783	0.000733629	0.00660435
NLRP3	-1.78267	0.0262812	0.0808326
CD209	-1.78229	0.0137877	0.0505256
PKNOX2	-1.78115	0.00454797	0.0230669
SNX32	-1.77899	0.00740384	0.0322106
DNAJB4	-1.77594	7.67e-06	0.000313568
SH3GL1	-1.7725	9.49e-06	0.000360675
EMR2	-1.77201	0.0281393	0.0847777
FGF1	-1.7716	0.00277118	0.0162889
IFFO2	-1.76918	1.69e-05	0.000533036
PCED1B-AS1	-1.7684	0.00730866	0.0319364
RNF40	-1.7652	3.2e-05	0.000822778
CECR6	-1.76391	0.00234332	0.0143489
TBC1D8B	-1.76287	1.06e-05	0.000394765
HSD3B7	-1.76286	7.66e-05	0.00142076
TMEM50A	-1.76282	8.81e-10	1.14e-06
FAF2	-1.76229	9.87e-09	3.98e-06
EIF4G1	-1.76206	0.00013365	0.00211416
GRAMD4	-1.76134	0.00151621	0.0106192
SERPINB8	-1.76094	0.00131179	0.00972561
ASF1B	-1.76055	0.0119221	0.0456483
RWDD2B	-1.76031	2.78e-06	0.000163276
FZD2	-1.75882	0.000144293	0.00221731
CD83	-1.7576	0.00245174	0.0148647
CD37	-1.75513	0.0070295	0.0310956
IRF5	-1.75447	0.00472718	0.0236414
LRRC25	-1.75362	0.00701523	0.031054
CPVL	-1.75338	0.00935785	0.0382009
CAMK4	-1.75078	0.00656664	0.0296614
PPP1CC	-1.75061	1.51e-05	0.000484988
TXNRD1	-1.74996	0.0016303	0.0111698
FMN1	-1.74956	0.00411637	0.0216168
MYOM1	-1.74569	0.00141267	0.01017
KLHL30	-1.74554	0.0266271	0.0815815
CRYAB	-1.74427	0.0172002	0.0593161
EMB	-1.74344	0.00172535	0.0115693
PPP2CA	-1.74272	2.03e-09	1.77e-06
C2	-1.74205	0.0146224	0.0527369
EFNB3	-1.74201	0.0479702	0.124575
PEPD	-1.74152	9.34e-05	0.00164913
PMAIP1	-1.73974	0.0493453	0.126958
LAMA4	-1.73707	9.64e-07	8.18e-05
TFPI2	-1.73544	0.0125021	0.0472552
B3GNT2	-1.7333	1.57e-10	5.07e-07
FRMPD1	-1.73144	0.00181112	0.0119397
ITPKC	-1.73141	0.00111157	0.00867479
VGLL3	-1.72693	0.00113523	0.00879566
THEM4	-1.72635	0.000524641	0.00525782
IQGAP3	-1.72201	0.0288876	0.0864752
KLHL31	-1.72152	0.0190165	0.063658
CLN6	-1.72083	2.83e-06	0.00016537
CD163	-1.71934	0.0235621	0.0745624
TMEM33	-1.71798	5e-09	2.8e-06
CHSY1	-1.71692	0.000209012	0.00279577
P4HB	-1.71647	2.07e-05	0.000612843
OAZ2	-1.716	8.92e-05	0.00159296
MAN1B1	-1.71385	0.00164857	0.0112354
COL12A1	-1.71333	0.00141506	0.0101758
SMARCA4	-1.71231	1.61e-08	5.12e-06
ANO1	-1.71225	5.52e-06	0.000250304
TTC30A	-1.71065	0.000200124	0.00270776
SLC22A5	-1.7106	0.000604759	0.00578239
PIK3CG	-1.70994	0.000701875	0.00642084
PTH2R	-1.70865	0.0358536	0.101491
C14orf180	-1.70843	0.00146485	0.0103664
FBXL7	-1.70826	1.13e-05	0.000407239
CFP	-1.70735	0.0172746	0.059509
SNX19	-1.70607	2.09e-07	2.82e-05
RASD2	-1.70407	0.00325757	0.0183539
TMEM140	-1.70311	1.15e-08	4.35e-06
SASH3	-1.70029	0.0172068	0.059323
OLFML3	-1.69959	0.000355172	0.00402862
SCYL2	-1.69812	0.000360405	0.0040669
CYP11A1	-1.69804	0.00178416	0.0118042
THBS1	-1.69705	0.0114177	0.0442982
EIF4B	-1.69548	0.00145618	0.0103321
SEMA6C	-1.69272	7.96e-07	6.99e-05
ARHGEF11	-1.68978	4.36e-07	4.81e-05
TNFRSF1A	-1.6865	1.61e-09	1.6e-06
CAMKMT	-1.68593	0.00210748	0.0132829
MTCH1	-1.68472	0.000133306	0.00211131
ZSCAN30	-1.6836	0.000191345	0.00264179
BCAP31	-1.68305	0.000526225	0.00526858
PURA	-1.68286	0.0128843	0.0483319
INTS3	-1.68233	4.91e-05	0.00107152
NANOS1	-1.6822	0.00717961	0.0315971
SECISBP2L	-1.68163	9.92e-05	0.00170933
SNX20	-1.6816	0.0168446	0.0584961
FZD9	-1.68105	0.00288332	0.0167723
WBSCR17	-1.6809	0.0202318	0.0665524
ZNF32	-1.68082	0.00159617	0.0110119
ENG	-1.68003	8.83e-06	0.000345516
COL5A1	-1.67817	0.0112232	0.043701
CLTCL1	-1.67721	0.00163146	0.0111708
SMG6	-1.67568	0.00143368	0.0102407
PTGDS	-1.67426	0.0100129	0.0403009
ZNF496	-1.67332	0.00146366	0.0103636
EFHD2	-1.67309	0.000260934	0.00327781
PGM3	-1.67223	0.0102923	0.0411054
TBC1D13	-1.67219	5.69e-05	0.00117061
FGD1	-1.67179	7.42e-06	0.00030581
NAGA	-1.67173	2.37e-05	0.000666881
SGCB	-1.66953	0.000333043	0.00385553
SOWAHC	-1.66941	5.13e-11	2.21e-07
THUMPD1	-1.66898	0.00115351	0.00889989
FAT1	-1.66875	0.000149789	0.00225346
ZFHX2	-1.66704	0.000260043	0.00327781
MRC2	-1.66589	0.00541777	0.0258531
ARHGAP30	-1.66488	0.0140357	0.0511641
BRI3BP	-1.66171	2.59e-05	0.000701274
ZNF488	-1.66132	0.0280523	0.0846226
APEX2	-1.66128	7.97e-08	1.37e-05
ITM2C	-1.66104	1.3e-05	0.000442659
VCP	-1.65849	3.64e-06	0.00019518
ARF4	-1.65809	0.000214915	0.00284525
LOC145474	-1.65767	0.0430899	0.115333
LOX	-1.65527	0.0108654	0.0427984
CREB3L1	-1.65492	0.0168492	0.0584965
C3AR1	-1.65478	0.0373108	0.104289
BACE2	-1.65085	0.00219338	0.0137057
TMED5	-1.64948	2.7e-07	3.32e-05
TLE2	-1.6492	0.000559938	0.00550275
PIK3R2	-1.64908	3e-05	0.000791808
ARPC3	-1.64903	7.06e-06	0.000292973
NHEJ1	-1.64875	5.23e-06	0.000244479
TNFRSF12A	-1.64815	0.046857	0.122435
CCL13	-1.64752	0.0426573	0.114522
PYCR1	-1.64565	0.0415347	0.112565
HIST1H1A	-1.64562	0.0147083	0.0529538
RND3	-1.64466	0.00605005	0.0278384
ITPRIP	-1.64424	0.00790871	0.033792
BAG3	-1.64238	5.16e-06	0.000244479
NCEH1	-1.64162	0.0235439	0.074523
SLC1A4	-1.6403	0.000296968	0.00356582
FN1	-1.6396	0.0173594	0.059658
TUBA1C	-1.63913	4.97e-07	5.09e-05
TRIM61	-1.63807	0.00197934	0.0127365
FAR2	-1.63757	0.000321914	0.00377065
C1QTNF9	-1.63748	0.0136612	0.0501959
UCP2	-1.63731	0.000139491	0.00216934
DDX19A	-1.63689	2.81e-08	6.47e-06
NCKAP5L	-1.63665	7.07e-05	0.00134644
ZNF227	-1.63627	1.24e-05	0.000432617
SETD8	-1.63627	0.00107996	0.00853255
WDR45	-1.63543	1.27e-05	0.000436773
CMPK2	-1.63526	0.000253412	0.00322906
UBE2H	-1.63525	4.13e-05	0.000961445
TXNDC5	-1.63414	2.24e-10	5.79e-07
2018-03-02	-1.6336	2.99e-05	0.00079069
ASIC1	-1.63225	0.00204792	0.0130284
CDKN2B	-1.63205	0.00103046	0.00825134
UBE2T	-1.63156	0.00911939	0.0374524
LASP1	-1.63099	5.94e-09	3.19e-06
MAPRE3	-1.63065	0.000126986	0.00203872
NUP188	-1.63031	1.07e-05	0.000395447
FAM198B	-1.62966	0.000145244	0.00222695
FKBP10	-1.62942	0.00138515	0.0100749
SPI1	-1.62878	0.00978788	0.0395684
RNF130	-1.62771	0.000184322	0.00257771
NDST1	-1.62533	5.18e-06	0.000244479
NAGLU	-1.62483	2.69e-07	3.32e-05
ZNF518B	-1.62388	0.00123344	0.0093161
KIF1C	-1.6238	0.000376373	0.00416301
CEP41	-1.62286	0.00078754	0.00691657
LINC00667	-1.62216	0.00591117	0.0274169
MFAP3L	-1.61851	0.000875656	0.00743128
RHOG	-1.61844	1.88e-08	5.27e-06
PALM	-1.6178	9.57e-06	0.0003621
VPS4A	-1.61722	0.000401553	0.00434471
AMPD3	-1.61662	0.0110373	0.043225
GPER	-1.61658	3.69e-06	0.000196018
ATP6V0A1	-1.6164	0.00195832	0.0126643
LILRB5	-1.61571	0.0106399	0.0421674
KPNA6	-1.61372	0.000290155	0.00351014
TMEM176A	-1.61192	0.0087784	0.0364933
DEF6	-1.61112	0.0122288	0.0465221
ZFAND2A	-1.61034	0.00378881	0.0203494
ARCN1	-1.60952	2.49e-07	3.22e-05
SOS2	-1.6089	4.74e-06	0.000230827
ICAM1	-1.60607	0.00492274	0.0242252
CCND2	-1.60519	0.0107943	0.0425702
TMEM168	-1.60498	1.34e-05	0.00045129
LRRC59	-1.60459	5.66e-06	0.000252784
RHBDF1	-1.60264	0.000151658	0.00226842
KDELR3	-1.60235	3.26e-05	0.000831402
C11orf52	-1.60195	0.00399903	0.0211816
CD248	-1.60122	0.0112972	0.0439228
DBX2	-1.60061	0.0475217	0.123796
CYP51A1	-1.60017	0.000294598	0.00354396
EVI2A	-1.59991	0.039557	0.108687
PIK3CB	-1.59726	0.000402717	0.00435366
BNC2	-1.59659	0.000759715	0.0067677
ANGPT1	-1.59574	2.16e-05	0.000626257
GFPT2	-1.59556	0.0087033	0.0362394
MEX3C	-1.59535	3.31e-08	7.23e-06
NADKD1	-1.595	0.00650848	0.0294571
ECT2	-1.59461	0.000441038	0.00465869
PIGT	-1.5939	1.05e-06	8.71e-05
SF1	-1.59288	2.13e-06	0.000137939
PIGS	-1.59213	2.08e-08	5.6e-06
FZD6	-1.59086	0.000301261	0.00360731
GGT5	-1.59049	0.000164745	0.0024017
GABARAP	-1.58962	2.47e-05	0.000683802
EPM2A	-1.58961	0.00018876	0.00262839
NBPF3	-1.58926	0.0124382	0.0470828
CLIC4	-1.58905	8.28e-07	7.22e-05
ZBTB43	-1.58839	1.29e-07	1.97e-05
ATM	-1.58792	3.91e-05	0.000927779
BHMT2	-1.58718	0.00427872	0.0220742
APRT	-1.58668	0.000793378	0.00693829
EPB41L1	-1.58554	0.000952536	0.00784315
METTL14	-1.58519	0.000171529	0.00246011
STK32C	-1.58517	0.000218802	0.00288488
RNF11	-1.58513	1.51e-06	0.000113385
CALU	-1.58345	0.000522545	0.00524088
IMPAD1	-1.58319	0.000644913	0.00604981
AFF3	-1.58311	0.0167645	0.0583211
RBM47	-1.58274	0.00206974	0.0131253
NCKAP1L	-1.58207	0.0306244	0.0903543
EVI5L	-1.58196	6.38e-05	0.00125718
BHLHE40	-1.58012	0.0367091	0.103121
OBSCN	-1.57978	0.0177255	0.0606257
TCEAL8	-1.57848	0.000131312	0.00208999
DIDO1	-1.57813	0.000235758	0.00306153
CCNL1	-1.57796	0.0183466	0.0620999
ARHGAP4	-1.57751	0.000924766	0.00772614
RMI2	-1.57602	0.0304608	0.0900569
RFFL	-1.57528	0.00110354	0.00863631
SLC7A8	-1.57488	0.0128771	0.0483191
CAP1	-1.57441	1.47e-05	0.000478945
TP53INP2	-1.57372	0.000182366	0.00256146
WIPF1	-1.57349	0.000241602	0.00312484
PIK3C2A	-1.57227	0.00381782	0.0204568
FAM105A	-1.57225	0.0129181	0.0484305
SLC47A1	-1.5722	0.042388	0.114179
FBXO38	-1.57188	1.49e-05	0.000481322
C4orf19	-1.57157	0.0138574	0.0507148
MLF2	-1.57106	2.01e-08	5.52e-06
HDLBP	-1.57078	3.02e-05	0.000795516
MEDAG	-1.57044	0.00525003	0.0253874
NUP205	-1.57032	0.000111078	0.00184056
IQSEC1	-1.56977	4.53e-05	0.00102602
NLN	-1.56974	0.000677287	0.00625551
FLNC	-1.56967	0.0214375	0.0696282
NFE2L2	-1.56958	1.5e-05	0.000482839
RAP2A	-1.5676	4.62e-05	0.00103837
PLAU	-1.56733	0.00504947	0.0246982
NSRP1	-1.56732	2.88e-06	0.00016537
THNSL2	-1.56699	0.031979	0.0931171
DUSP10	-1.56608	0.00720042	0.0316564
DENND1B	-1.56527	0.0035519	0.0194849
FAM200B	-1.56445	4.93e-07	5.09e-05
FRMD4B	-1.5643	0.00463853	0.0233588
LOC100294145	-1.56423	0.0276292	0.0837912
FLVCR2	-1.56404	0.000423176	0.00452182
MCAM	-1.56374	0.000242629	0.00313499
CDC42EP1	-1.56345	2.49e-06	0.000152451
DCLRE1B	-1.56306	1.07e-05	0.000395447
C2orf15	-1.56188	0.0299662	0.0889341
MAP1LC3A	-1.56165	0.000452538	0.00474522
RTF1	-1.56098	0.00219583	0.0137125
MBOAT7	-1.56053	2.08e-06	0.000136746
ACPL2	-1.5603	0.00156939	0.0109013
RNF126	-1.55946	0.000695448	0.00636748
IL7R	-1.55811	0.0286767	0.0860635
SEMA3C	-1.55799	0.0143127	0.0518955
CHST15	-1.55721	0.000780012	0.00686794
MED24	-1.55713	5.19e-06	0.000244479
XRCC3	-1.55642	0.000316405	0.00373485
RNF166	-1.55635	1.09e-05	0.000397891
SLC30A6	-1.55632	0.0204222	0.067025
SLC16A14	-1.55613	0.00679016	0.0303804
PWWP2A	-1.5559	0.000212719	0.00283069
CD200R1	-1.55509	0.0176678	0.0604764
PAQR7	-1.55498	5.54e-07	5.33e-05
S100A11	-1.55391	0.00012725	0.00204042
LYVE1	-1.55377	0.0228808	0.0729918
IRF2BP2	-1.5535	0.000302072	0.00360972
CNDP2	-1.55329	6.18e-07	5.87e-05
MAP4K1	-1.55321	0.0334037	0.0960186
CCNDBP1	-1.55306	0.00023446	0.0030539
RCOR2	-1.55303	0.0143564	0.0519983
REXO1	-1.55252	0.00173399	0.0115965
TNF	-1.55202	0.0460422	0.121066
CALML4	-1.55046	0.00423779	0.0220038
ZNF788	-1.55031	0.00727295	0.0318287
RER1	-1.55023	6.03e-08	1.14e-05
FCGR2C	-1.55022	0.026781	0.0819363
MRPL17	-1.54888	1.27e-07	1.97e-05
EPHA1	-1.54781	0.00240412	0.0146035
SNX10	-1.54757	0.0330391	0.0952789
PCNXL3	-1.54752	3.85e-08	8.08e-06
NPL	-1.54742	0.0334071	0.0960186
TSPAN31	-1.5471	0.000236618	0.00306961
EMID1	-1.54559	0.0231138	0.0735221
WHAMM	-1.54555	1.81e-06	0.000123861
GNA12	-1.54546	9.62e-06	0.000362698
REM1	-1.54533	0.000585614	0.00566225
SLC6A6	-1.54485	0.00341986	0.0189943
VAMP8	-1.54476	0.00900385	0.0370605
COLEC11	-1.54437	0.021447	0.0696282
NOP10	-1.5427	0.000570414	0.00556111
DECR2	-1.54171	0.000501516	0.0050991
AGRN	-1.54156	6.44e-05	0.00126251
GRASP	-1.54153	0.00417226	0.0217598
MTO1	-1.54031	3.36e-05	0.000848561
TMEM117	-1.5402	0.00488441	0.024122
LPCAT2	-1.53993	0.000635395	0.005991
RDH5	-1.53976	0.0095418	0.0387923
ZNF714	-1.53902	6.09e-05	0.00123388
MAP7	-1.53867	0.00488417	0.024122
AIF1L	-1.53856	3.47e-05	0.000857653
AOX1	-1.53811	0.0196967	0.0652246
SMOC2	-1.53795	0.0210523	0.0686361
BRD4	-1.53794	4.17e-05	0.000968934
MAN1A1	-1.53786	4.87e-05	0.00106902
TTF1	-1.53774	0.00930847	0.0380854
MYO7A	-1.53736	0.000709093	0.00646397
SIX4	-1.53655	0.00650029	0.0294406
GNPDA2	-1.536	0.00182586	0.0120246
SPNS1	-1.53593	7.68e-07	6.84e-05
CAB39L	-1.53554	0.0360722	0.101842
C8orf37	-1.53507	0.00593952	0.0274892
EPHB6	-1.53448	0.0126624	0.0476999
DAB2	-1.53435	0.00331703	0.0186157
DDAH2	-1.53387	3.44e-05	0.000853248
C1QA	-1.53365	0.0225169	0.0721213
MPRIP	-1.53339	6.55e-05	0.00127854
LOC100131089	-1.53287	0.00784352	0.0336101
TOR1B	-1.53263	9.5e-08	1.57e-05
SLC5A6	-1.53224	0.0069651	0.0309699
SNX3	-1.53114	0.00140985	0.01017
SFMBT2	-1.5309	0.00457372	0.0231429
SERPINB9	-1.52997	0.00121831	0.00922343
MYPOP	-1.5299	8.88e-05	0.00159011
GLIPR1	-1.52977	0.0366795	0.10306
CD302	-1.52964	0.00377253	0.0202899
TYMP	-1.52936	0.00830466	0.0349972
FECH	-1.52934	0.000186814	0.00260973
BMF	-1.52925	0.00439103	0.0225455
HMGB1	-1.52891	6.02e-05	0.00122273
ITSN2	-1.52886	4.77e-05	0.00105443
INCENP	-1.5285	2.16e-05	0.000626257
FHL2	-1.52849	0.0114951	0.0444513
C1orf198	-1.52822	0.00947623	0.0385865
TRIL	-1.52819	0.00697543	0.0309731
HMOX1	-1.52788	0.0128047	0.0481173
DIP2A	-1.52774	2.06e-09	1.77e-06
GAS2L1	-1.52773	5.53e-06	0.000250304
NDUFAF1	-1.52757	0.000672806	0.00622104
C7orf41	-1.52726	0.00287895	0.0167545
GORASP2	-1.52693	4.65e-06	0.000227321
PTPRA	-1.52662	6.84e-07	6.31e-05
PSMB2	-1.52504	8.67e-05	0.00155933
LAPTM5	-1.5248	0.00899724	0.037053
RTN1	-1.52435	0.00325179	0.0183539
HSPA14	-1.52327	0.00571692	0.0267758
ABCC4	-1.52316	0.0169843	0.0587915
BCL2L12	-1.52244	4.77e-05	0.00105443
ARHGAP17	-1.5204	2.31e-09	1.86e-06
CRELD1	-1.5193	1.74e-05	0.000538199
PMM2	-1.51817	0.00332087	0.018629
FAM104A	-1.51805	5.22e-05	0.00111828
SLC43A1	-1.5175	0.00225849	0.0139608
CD68	-1.51688	0.0221126	0.0712149
SLC29A3	-1.51658	0.00543375	0.0258911
CNOT4	-1.51623	0.00160987	0.0110768
ACOX1	-1.51613	0.000716291	0.00650203
ABCA3	-1.51578	0.00012652	0.00203377
DERL2	-1.51551	0.000562634	0.00550815
PTMA	-1.51525	4.1e-06	0.000210028
PISD	-1.51454	0.011294	0.0439228
CD163L1	-1.51424	0.0255731	0.0793629
TMEM30B	-1.51416	0.0485262	0.125526
MDFI	-1.51382	0.00744009	0.0323356
GLT25D1	-1.51339	8.49e-07	7.36e-05
OSGIN2	-1.51307	0.00323179	0.0182724
ZNF362	-1.51276	5.57e-08	1.12e-05
SNRPD1	-1.51231	4.43e-05	0.00100779
SLU7	-1.5121	0.00185639	0.012176
SERINC2	-1.51184	0.0496366	0.127504
NFATC3	-1.51167	4.08e-09	2.51e-06
SEC61A1	-1.51164	2.87e-06	0.00016537
POP5	-1.51133	0.000845072	0.00723835
FUCA1	-1.51106	0.00318707	0.0180909
RAI1	-1.51091	1.89e-05	0.000569897
ADRBK1	-1.51079	1.38e-09	1.48e-06
ZDHHC24	-1.51053	2.66e-08	6.24e-06
LPPR4	-1.5103	0.0142044	0.0516189
MASP1	-1.51023	0.0434129	0.115996
JUND	-1.50912	0.0332189	0.0956478
SUSD1	-1.50896	0.00299576	0.01724
POM121C	-1.50836	4.13e-06	0.000210028
ASPSCR1	-1.50831	0.00129299	0.00961401
SMCR8	-1.5082	3.24e-06	0.000181793
GLTP	-1.50803	2.62e-08	6.24e-06
SGMS2	-1.50797	0.0127507	0.0479564
ADAM15	-1.5078	0.000155498	0.00231508
BCL9	-1.50762	0.00131252	0.00972561
SKI	-1.50719	1.72e-05	0.000536906
E2F1	-1.50655	0.00837726	0.0352456
MBNL2	-1.50611	3.93e-06	0.000204615
ZFYVE20	-1.50429	0.000106415	0.00178561
TTC37	-1.50402	6.76e-06	0.000286965
CLIP3	-1.50402	0.00193101	0.0125254
BLZF1	-1.50399	0.00456735	0.0231288
PLK2	-1.50315	0.0227301	0.0726419
IKZF1	-1.50295	0.0465147	0.12196
HMGA1	-1.50266	0.000805748	0.00702743
PLCB2	-1.5019	0.0305404	0.0902302
LOC100506844	-1.5017	0.00265031	0.0157368
SRP54	-1.50159	9.03e-06	0.000349166
RALA	-1.50084	0.00118482	0.00904943
APOPT1	-1.50082	0.0165441	0.0577479
ENOPH1	-1.5007	0.000617747	0.00586746
HIST1H2AG	-1.50052	0.0190241	0.063667
CCSAP	-1.50033	0.000630028	0.00594909
WASF2	-1.49985	0.00170861	0.0114928
TUBB2A	-1.49968	0.0353294	0.100249
KCTD10	-1.4996	1.82e-05	0.000557725
SH3BP5	-1.49922	0.00171511	0.0115305
KIAA0930	-1.49901	0.00124449	0.00936672
LIMD1	-1.49825	0.000391765	0.00426877
TMEM132A	-1.49804	0.00452004	0.0229975
KDM1A	-1.49787	0.00079775	0.00696709
MYLIP	-1.49726	0.000772724	0.00683545
PAQR3	-1.49713	0.00551385	0.0261665
TRPM2	-1.49643	0.0192527	0.0641491
CANX	-1.49603	2.6e-06	0.000155855
TBC1D9	-1.49602	1.55e-06	0.000115883
ELP5	-1.49566	0.000746889	0.00666963
LIX1L	-1.49542	0.00174259	0.0116305
ANKIB1	-1.49512	0.000460409	0.00481211
C4orf52	-1.49496	0.00136882	0.0100049
SPRY2	-1.49403	0.00249127	0.0150338
COX17	-1.49371	0.000430059	0.00458019
TMEM189	-1.49366	0.000407627	0.00438939
MAP2K3	-1.49311	6.16e-05	0.0012349
TPPP3	-1.49255	0.0305954	0.0903243
MGC16025	-1.49254	0.0101855	0.0407969
ARAP3	-1.49229	0.000411021	0.00441753
NRK	-1.49205	0.0224526	0.0719702
ATIC	-1.49186	0.000787999	0.00691657
FZD5	-1.49182	4.37e-05	0.000996952
MEOX2	-1.49158	0.00103919	0.00829902
PON2	-1.49149	0.000527756	0.00526858
GLI3	-1.4898	0.00796481	0.0339194
RHOB	-1.4897	0.0456661	0.120175
CALB2	-1.48933	0.00817783	0.0346588
USP36	-1.48912	0.00156119	0.0108635
TFRC	-1.48871	0.0069027	0.0307703
SH3BP1	-1.48823	0.0219409	0.0708032
TFEB	-1.48799	8.58e-06	0.000339147
KCNJ8	-1.48793	5.19e-06	0.000244479
ACVR1B	-1.48786	0.00288743	0.0167887
IFIT3	-1.4877	0.00399801	0.0211816
RIN3	-1.48653	6.56e-06	0.000282146
RBFOX2	-1.48644	0.000530945	0.00529223
FKBP14	-1.48558	0.00128161	0.00955691
KLHL14	-1.48535	0.0256124	0.0794151
MSX1	-1.4845	0.00590822	0.0274169
PLTP	-1.4844	0.0365587	0.102833
PKN1	-1.48429	6.57e-08	1.2e-05
KCTD20	-1.48416	7.29e-05	0.00137567
SH3GLB2	-1.48412	0.00115734	0.00892412
GPRC5B	-1.48365	0.00145689	0.0103321
IFI6	-1.48325	0.00328134	0.0184717
ZNF658	-1.48275	0.00382752	0.0204918
KIAA1467	-1.48263	0.0010924	0.00858229
CRY2	-1.48179	0.00425209	0.0220431
DRAP1	-1.48156	5.19e-05	0.00111327
PLEKHA2	-1.48155	0.0001364	0.00213671
VPS8	-1.4808	0.000279107	0.00342789
MARS	-1.48079	0.000117734	0.00193101
C12orf5	-1.48007	0.00786942	0.0336806
WDR36	-1.47968	0.000119156	0.00194939
TAB3	-1.47953	2.45e-05	0.000680266
PRICKLE2	-1.47942	0.000891768	0.00752842
CGREF1	-1.47895	0.00969961	0.0392608
RPS6KA1	-1.47859	0.0329072	0.0950259
DOK2	-1.4783	0.0330544	0.0953017
ADAMTS10	-1.47824	0.0238294	0.0751503
ZFP91	-1.47731	0.000588335	0.00567581
CBFA2T3	-1.47731	0.00226514	0.013983
MYRIP	-1.47615	0.0158072	0.0557328
SLC1A1	-1.47612	0.00469553	0.0235267
BRAT1	-1.47609	5.43e-06	0.000248345
CD97	-1.47588	0.00321824	0.0182126
ZNF642	-1.47493	0.00160247	0.0110377
KIAA0408	-1.47475	0.00667486	0.0300101
SAE1	-1.47466	6.34e-06	0.000278475
C21orf59	-1.47443	0.00137947	0.0100487
PPP1R10	-1.47386	2.21e-05	0.000637202
COBLL1	-1.47354	0.00545315	0.0259529
MEN1	-1.47353	3.56e-06	0.000191608
AKIRIN1	-1.47352	7.1e-05	0.00135056
RGS14	-1.47325	0.0383611	0.106281
ASRGL1	-1.47302	0.0382071	0.10594
EDNRB	-1.47278	0.00037458	0.00415885
ANKRD36BP1	-1.47238	0.000623222	0.00589776
TMEM104	-1.47225	5.25e-06	0.000244479
PNO1	-1.47187	0.00376425	0.0202688
SPOP	-1.47157	0.000193973	0.00265059
MTMR10	-1.47152	0.00224753	0.0139076
TNFRSF19	-1.47131	0.0257711	0.079773
OLFML2B	-1.47122	0.0145744	0.0526198
RCN2	-1.47068	1.78e-06	0.000122629
PGRMC2	-1.47052	0.00487943	0.024122
FANCC	-1.4705	0.000582204	0.0056462
MCM8	-1.47036	0.00149015	0.0104867
CPEB3	-1.47009	4.12e-06	0.000210028
C3orf70	-1.46968	0.00202227	0.0129161
TIMP1	-1.46961	0.0369804	0.10368
DDX52	-1.46958	3.88e-08	8.08e-06
KPNA2	-1.46943	0.00834292	0.0351241
DDB1	-1.46876	3.46e-06	0.000187666
SNCG	-1.46869	0.0213507	0.0694018
HSPA13	-1.46865	0.000100881	0.00172244
TMEM5	-1.46857	3.62e-05	0.000882643
LANCL2	-1.46827	0.000391212	0.00426877
UBR4	-1.46813	0.000840972	0.0072176
ADPRHL2	-1.46811	6.11e-05	0.00123426
FBXW7	-1.46799	0.000182119	0.00256078
RAB8B	-1.46794	0.000515168	0.00518705
FERMT2	-1.46774	0.00072808	0.00657667
FBLN5	-1.46769	0.00453402	0.0230363
AP2A1	-1.46767	2.71e-05	0.000727024
ADAM19	-1.46754	0.00760662	0.0328932
TRPC6	-1.46748	0.00182777	0.012031
AGPS	-1.4674	5.97e-05	0.00121815
MBD2	-1.46646	0.00142124	0.0101971
KIAA1598	-1.46636	0.0208599	0.0681151
MAPT	-1.46607	0.0190914	0.0637762
CTIF	-1.466	0.00260422	0.0155482
RRBP1	-1.46599	2.06e-06	0.000136746
CCDC3	-1.46541	0.0179959	0.0613057
IGSF8	-1.46481	0.00199968	0.0128035
AP5Z1	-1.46474	1.21e-06	9.68e-05
SLC48A1	-1.46463	0.000173301	0.00247452
GPLD1	-1.464	0.0475549	0.123833
WRAP53	-1.46367	7.31e-05	0.00137676
PLIN3	-1.46352	0.000105605	0.00177956
BST2	-1.4633	0.000667667	0.00620911
PPAPDC1B	-1.46205	0.00510068	0.0248797
CEP112	-1.46177	0.0128693	0.0483038
SNX6	-1.46175	0.00117821	0.00903109
KCND2	-1.46127	0.0171906	0.05931
MYO1B	-1.46057	1.2e-05	0.000427215
YWHAE	-1.46051	0.000516574	0.00519715
FAM100B	-1.46021	0.00109582	0.00860396
PALM2	-1.45994	0.00196203	0.0126756
MTM1	-1.45906	0.000773519	0.00683545
FXR2	-1.45899	0.000245508	0.0031564
TWF2	-1.45834	9.75e-05	0.00168627
PHF10	-1.45779	0.0068593	0.030626
CEBPB	-1.45662	0.00662133	0.0298006
IGFBP5	-1.45652	0.0316497	0.0925123
RNF19B	-1.45614	0.00152114	0.0106422
AP5S1	-1.45598	4.06e-06	0.000209775
CLTC	-1.4556	0.00014726	0.00222695
SLC46A3	-1.45556	0.00101468	0.0081757
PAPSS2	-1.45523	0.00080809	0.0070336
TMEM185B	-1.45509	4.42e-07	4.84e-05
RNF167	-1.4548	0.000496723	0.00506217
ARL6IP1	-1.45448	4.38e-05	0.00099812
ATP2B4	-1.45424	0.00034119	0.00392481
FOCAD	-1.45394	0.00246154	0.0149032
ANKRD37	-1.45374	0.0319792	0.0931171
HIST1H3C	-1.45364	0.0387342	0.107154
CENPN	-1.45361	0.00169464	0.0114484
PROSER1	-1.45354	1.22e-05	0.000429565
ZFPM1	-1.45333	0.000496422	0.00506217
SEC23IP	-1.45239	9.95e-07	8.4e-05
CNTNAP1	-1.45172	0.00759197	0.0328629
RETSAT	-1.4517	0.00440526	0.0226006
PHTF2	-1.45129	0.000276659	0.00341407
C11orf49	-1.45117	0.000496883	0.00506217
RBM23	-1.45096	0.000243452	0.00313945
PHLDB1	-1.45074	2.1e-05	0.000614106
HMCN1	-1.45066	0.0137235	0.0503534
CDK11A	-1.45063	0.00875883	0.0364237
MED18	-1.45042	0.000810289	0.0070385
ZBTB1	-1.45006	1.21e-05	0.000427515
STXBP2	-1.44975	0.043933	0.11707
NT5C3L	-1.44849	0.00591448	0.0274224
LOC100507331	-1.44816	0.0296489	0.0882425
ABCD1	-1.44816	0.000382773	0.00420496
UVRAG	-1.44757	0.00207445	0.0131324
GAPDH	-1.44748	0.000832997	0.00716098
ZNF275	-1.44746	0.00820282	0.034704
C1D	-1.44728	0.000941484	0.00781267
RBPMS2	-1.44709	0.000817777	0.00707007
KANK1	-1.44695	0.00112049	0.00871285
ATP6V0B	-1.44633	0.000273159	0.00337733
NHLRC3	-1.44565	0.00034146	0.00392481
OSBPL5	-1.44553	0.000140527	0.00217236
DAAM1	-1.44536	0.00141471	0.0101758
ADAMTSL3	-1.44427	0.0246232	0.0771073
ACADVL	-1.44421	3.91e-06	0.000204615
CRIM1	-1.44416	0.000364311	0.00409627
BTBD1	-1.4431	0.00540398	0.0258254
PNKD	-1.44283	0.0497792	0.127794
FEZ2	-1.44208	3.76e-05	0.000902437
NEDD4	-1.44124	0.00087104	0.00739697
ARMC1	-1.4408	0.000945912	0.00781267
SLC35B4	-1.43996	0.000344614	0.00394272
SPRYD3	-1.43994	0.000167783	0.00242525
C17orf51	-1.4396	0.00104559	0.00833116
ZNF131	-1.43913	0.00162862	0.011169
SLC27A4	-1.43904	0.019906	0.0657322
DMGDH	-1.43824	0.0190777	0.0637472
FSTL1	-1.4382	0.00727161	0.0318287
CHRDL1	-1.43798	0.00208225	0.0131689
RNPEPL1	-1.43785	1.75e-06	0.000121736
CAPZA2	-1.43764	0.00201124	0.0128648
VIMP	-1.43755	0.0157844	0.0556939
SLC25A11	-1.43728	6.39e-05	0.00125718
ADAMTS12	-1.43706	0.000255089	0.00324275
RWDD1	-1.43639	0.00181514	0.0119601
GSK3A	-1.43638	5.89e-06	0.000262338
YBX1	-1.43634	7.26e-09	3.47e-06
CDC27	-1.43607	0.000575159	0.00559974
LOC100128822	-1.43598	0.00492766	0.0242402
PDXDC1	-1.43584	0.00249371	0.0150415
SNHG9	-1.43546	0.00983204	0.0397096
KLHL6	-1.43533	0.0185617	0.0626882
UFL1	-1.43526	0.0101866	0.0407969
TNFRSF21	-1.43519	0.000716004	0.00650203
LEO1	-1.43518	0.00351744	0.0193722
PIAS3	-1.43419	0.000551014	0.00545436
STK17A	-1.4341	0.00223543	0.0138593
ZNF570	-1.43376	2.92e-05	0.000775245
OBSL1	-1.43364	0.00260937	0.0155574
VSIG10L	-1.43349	0.0152342	0.0541865
PATL1	-1.43264	0.0148713	0.0532921
BACE1	-1.43249	0.000176649	0.00250225
NID1	-1.43241	5.5e-06	0.000250304
DPY19L3	-1.43241	0.000170397	0.00244802
ZNF195	-1.43215	0.00624565	0.0285537
XXYLT1	-1.43125	0.00890044	0.0368463
FERMT3	-1.43049	0.0467729	0.122313
INPP5K	-1.43047	0.000553623	0.00546761
CENPQ	-1.43042	0.0209644	0.0683699
PDIA3P	-1.43039	0.000176023	0.00249957
MGST3	-1.43035	0.000817781	0.00707007
WDTC1	-1.42997	0.000255977	0.00324573
PDK3	-1.42954	0.0154441	0.0547823
RPS6KB2	-1.42941	5.22e-06	0.000244479
DDAH1	-1.4293	0.000342709	0.0039328
PRKCDBP	-1.42928	0.00529661	0.0255012
UQCRQ	-1.42922	0.00216489	0.0135719
KIFC3	-1.42897	0.00126321	0.00946347
NUDCD2	-1.42863	4.18e-06	0.000211634
REPS2	-1.42832	0.00380509	0.020414
STK40	-1.42805	0.000296107	0.00355879
ADAMTS15	-1.42803	0.0117655	0.0452126
TNFRSF10D	-1.42788	0.0137089	0.0503283
FXYD6	-1.42704	0.000327036	0.00379962
ATOH8	-1.42699	0.0170061	0.0588323
C16orf70	-1.42698	0.00325356	0.0183539
TEAD3	-1.42688	0.00139109	0.0100877
ALKBH5	-1.42662	4.75e-07	4.94e-05
PBX1	-1.42645	0.00261775	0.0156002
TRIP13	-1.4251	0.0086485	0.0360733
ZKSCAN1	-1.42506	0.00360561	0.0196875
KAT7	-1.42485	0.0030846	0.0176099
DTWD2	-1.42391	0.000818305	0.00707007
ARRB2	-1.42381	0.0253785	0.0789744
COL15A1	-1.42284	0.00416074	0.0217436
CENPJ	-1.42264	0.00507462	0.0248024
NCAM1	-1.4226	0.0177577	0.0606713
TRIM6	-1.4218	0.0381845	0.10594
STARD9	-1.4218	0.0128038	0.0481173
LINC00630	-1.42143	0.00239981	0.014591
SLC6A8	-1.42142	0.0265502	0.0814038
PCDH18	-1.42102	0.0094229	0.0384543
RCN3	-1.42087	0.00478764	0.0238441
HARBI1	-1.42081	0.00091736	0.00768914
PSMA4	-1.42035	0.011443	0.044343
UBQLN2	-1.41996	0.00168394	0.0113982
ACSF3	-1.41975	6.88e-06	0.000288366
GATSL2	-1.41967	0.00126435	0.00946646
CASP10	-1.41901	0.00480242	0.0238572
C19orf55	-1.41874	0.000191769	0.00264179
TMF1	-1.41852	0.00686431	0.0306378
GPR176	-1.41841	0.00892901	0.0368818
RAB14	-1.41829	0.0016148	0.011099
C16orf72	-1.41758	4.57e-06	0.00022429
LOXL4	-1.41667	0.00493074	0.0242461
ME2	-1.41638	0.00125757	0.00943213
PLA2G16	-1.41637	0.0071595	0.0315301
KIAA1958	-1.4159	0.0402903	0.110191
EWSR1	-1.41568	5.78e-05	0.00118489
ZFP36L2	-1.4156	0.000668545	0.00621122
THAP2	-1.41544	0.00353039	0.0194164
DDX58	-1.41523	0.00245407	0.0148719
GATAD2A	-1.41501	2.74e-07	3.34e-05
ADI1	-1.41486	0.00203276	0.0129575
GTF3C4	-1.41454	0.00501919	0.0245893
ERAP1	-1.41434	3.94e-05	0.000930671
MPP1	-1.41431	0.00262871	0.0156548
IER3IP1	-1.41407	1.95e-05	0.000588182
TTC23	-1.41366	0.00135376	0.00996259
FLVCR1	-1.41315	0.00992422	0.0400068
PABPC4	-1.41311	0.000763162	0.00679372
SUGT1P1	-1.41304	0.0311444	0.091277
SERTAD3	-1.413	0.000718007	0.00650845
ISPD	-1.41254	0.000814792	0.00706336
CAMK2N1	-1.41247	0.0321666	0.0935261
PYGO2	-1.41218	5.53e-05	0.0011519
PKD2	-1.41203	0.00426026	0.0220432
DCPS	-1.41191	0.000492423	0.00505262
LOC158696	-1.41087	0.0171004	0.059114
TRAPPC8	-1.41062	0.00110142	0.00862969
TRERF1	-1.41051	0.00834235	0.0351241
C6orf70	-1.41018	0.019766	0.0653868
PRRX1	-1.40893	0.0149757	0.0535725
ZMAT2	-1.40873	0.00212327	0.0133563
YIF1B	-1.40783	0.000468112	0.00486505
NBR2	-1.40775	0.0250953	0.0782629
VOPP1	-1.40691	0.000201532	0.00272111
SEC11A	-1.40665	0.000395756	0.00430002
KL	-1.40647	0.0182917	0.0619961
KIAA1462	-1.40623	0.0114386	0.0443393
TRAPPC4	-1.40621	0.000245306	0.0031564
PDE7B	-1.40569	0.0255975	0.0793879
EHD1	-1.4056	4.75e-05	0.00105289
UBAC1	-1.40554	0.000504792	0.00511047
FXR1	-1.40517	0.0159346	0.0560904
RHOBTB3	-1.40488	0.0114867	0.0444493
UBR1	-1.40468	0.000413798	0.00444368
GID8	-1.40447	7.37e-05	0.00138256
INPP5D	-1.40446	0.000929069	0.00775706
PFN2	-1.40444	0.000355926	0.00403362
KDM6A	-1.40436	0.028205	0.0848845
NKAPL	-1.40371	0.00545477	0.0259529
HINT3	-1.4034	0.00341139	0.0189687
MSANTD2	-1.4034	0.0235711	0.0745726
TUT1	-1.40282	0.000235183	0.00305714
NACC2	-1.40277	0.000215157	0.00284554
CRTC3	-1.40267	0.00158589	0.0109766
FBXO5	-1.40265	0.00698802	0.0310077
LURAP1	-1.40251	0.0139067	0.0508378
RFT1	-1.40213	0.000147099	0.00222695
AJAP1	-1.40181	0.0410777	0.111674
LOC113230	-1.40177	0.0269331	0.0822457
FAM110A	-1.40173	0.0132367	0.04914
PEA15	-1.40158	0.000738676	0.00662949
RALBP1	-1.40154	5.71e-05	0.00117091
PCNXL4	-1.40143	0.0011403	0.00880849
SPHAR	-1.40121	0.0299924	0.0889572
C14orf119	-1.40083	0.00291252	0.0168965
FASTKD1	-1.40052	0.0071626	0.031533
TMEM106C	-1.40036	0.0084924	0.0355554
USP32	-1.40014	0.00436209	0.0224147
SPTY2D1	-1.39992	2.56e-05	0.000699005
TEAD4	-1.3999	0.0109495	0.0429856
DCAF6	-1.39985	0.0140575	0.0512294
PCDH9	-1.39971	0.0485964	0.125657
H2AFY2	-1.39951	0.00674135	0.0302354
BOLA3	-1.39864	0.00348928	0.0192642
GPN2	-1.39838	3.32e-06	0.000182414
SLC39A9	-1.39779	1.26e-05	0.000436281
RPL22	-1.39766	0.00411268	0.0216062
ASAH1	-1.39756	0.00707308	0.0312405
DCUN1D5	-1.39753	0.00162058	0.0111269
KCNIP2	-1.39646	0.0417063	0.112837
SLC35D1	-1.39644	0.00260349	0.0155482
SULT1A1	-1.39579	0.0234318	0.0742956
SLC24A1	-1.39566	0.00416441	0.0217452
IER5	-1.39532	0.00425781	0.0220432
TSPYL6	1.39525	0.0191519	0.063915
NDUFA6	1.39536	0.000499802	0.0050879
C6orf226	1.39538	0.00705135	0.0311708
MRPL21	1.39572	0.000233495	0.00305057
AUP1	1.39576	3.33e-05	0.000844899
HSD17B7P2	1.39652	0.0309539	0.0910564
PTS	1.39669	0.00685387	0.0306124
UBL7	1.39703	0.0225845	0.072266
RABL2A	1.39706	0.0165713	0.0577959
THRA	1.39718	0.0015998	0.0110252
ALG1	1.39766	0.0013148	0.0097369
TRNP1	1.39803	0.0387511	0.107178
KAT6A	1.3988	0.000195237	0.00265831
TIMMDC1	1.39887	0.00201928	0.0129098
SERBP1	1.39925	3.43e-05	0.000853248
PPP6R2	1.39952	0.00013707	0.002142
ETFB	1.39953	0.00345801	0.0191325
UBE2W	1.39956	0.000983202	0.00800971
SBNO1	1.39981	3.14e-05	0.000813486
EIF4E2	1.40001	0.00279892	0.0164071
RXRA	1.40035	0.000408106	0.00438986
GUSB	1.40067	0.00407578	0.021456
ZNF175	1.4007	7.6e-06	0.000312264
PACRGL	1.40077	0.00881294	0.0365891
LOC100506795	1.40113	0.0228793	0.0729918
FBXL6	1.40124	0.00360949	0.0196962
C3orf33	1.40134	0.00541088	0.0258393
MIA3	1.40137	0.000333575	0.00385823
LMO3	1.40163	0.0350155	0.0996868
CRLS1	1.40178	0.00224386	0.0138915
TMEM81	1.40178	0.00539108	0.0257829
AMIGO2	1.4019	0.0280318	0.0846199
TBX2	1.40196	0.00711532	0.031357
PSMC3IP	1.40201	0.00662074	0.0298006
GNPAT	1.40256	4.23e-06	0.000213039
VEZF1	1.40286	0.000850185	0.00726768
GTPBP6	1.4029	3.99e-05	0.000935645
TSPYL4	1.4031	0.000693619	0.00635883
C14orf101	1.40324	7.8e-05	0.00144382
PRR13	1.40333	0.000476106	0.00493621
STK10	1.40352	0.0154606	0.0548209
DDX1	1.40369	0.000485811	0.00500467
ING1	1.4038	0.0115013	0.0444621
RANBP1	1.404	9.83e-06	0.0003689
PCCA	1.40431	0.00117069	0.00898556
WDR48	1.40452	9.64e-06	0.000362698
ENGASE	1.40466	0.0030466	0.0174392
ACTL6A	1.40503	0.000827677	0.00713195
DNM3	1.4056	0.0130411	0.0487064
ZXDA	1.40592	0.000162739	0.00238709
FANCE	1.40599	0.0247055	0.0773274
NKAPP1	1.40602	0.00822969	0.0347919
LAMTOR5	1.40617	0.00036	0.0040669
ZBTB44	1.40627	1.29e-05	0.000440096
FAM48A	1.40649	0.005111	0.0249016
CTSO	1.40654	0.00247046	0.0149292
RAPH1	1.40671	0.00135857	0.00998659
ATP5L2	1.40706	0.00945532	0.03855
DKFZP586I1420	1.40729	1.5e-05	0.000484442
DCTN6	1.40735	5.22e-06	0.000244479
TEX10	1.40738	0.0016989	0.0114484
NPHP3	1.40758	0.00140671	0.0101684
BOLA1	1.40776	0.00370407	0.0200723
PTK2	1.40783	0.000149338	0.0022493
AP4B1	1.40797	0.00532679	0.0255892
BCAS3	1.40804	0.000178924	0.00252192
KAT2A	1.40819	0.00953354	0.0387832
MRPS22	1.40828	1.11e-05	0.000403106
CSDA	1.40838	0.00051944	0.00521785
MFSD6	1.4085	0.00991833	0.0399956
RPL38	1.40852	4.11e-06	0.000210028
RBM19	1.40873	3.1e-05	0.000810354
TBC1D8	1.40888	0.00157259	0.0109077
ALAS1	1.40898	0.00465827	0.0234223
MAML3	1.40916	0.0119913	0.0458433
ECH1	1.40918	0.00401864	0.0212418
PDCD1LG2	1.40938	0.000641011	0.00602382
RASSF3	1.40948	0.00463904	0.0233588
RPS2	1.40966	0.00110693	0.00864909
EFCAB11	1.40993	0.00799271	0.0340158
RPL5	1.41011	8.3e-05	0.0015089
MYO15B	1.4102	0.0107822	0.0425358
RPL18A	1.41079	2.52e-05	0.000692946
LOC285074	1.41106	0.00260864	0.0155574
PID1	1.4112	0.00527507	0.0254541
ZNF23	1.4114	0.00120836	0.00915887
PSMB7	1.41151	4.02e-05	0.000937708
LOC100132352	1.41154	0.0207927	0.0679646
TMEM79	1.41158	0.00353682	0.0194435
PIN1	1.41172	0.00110803	0.00865245
SENP6	1.41175	4.31e-09	2.53e-06
PIGM	1.41186	0.00123923	0.00934336
SLC25A22	1.41199	0.0224331	0.0719445
CCBL1	1.41236	0.0305935	0.0903243
FGF12	1.41238	0.0470265	0.122828
SAPCD1	1.41278	0.0310127	0.091127
BBS9	1.41283	6.6e-06	0.000283037
C2orf68	1.41312	0.00115995	0.00893887
MRPS9	1.41336	2.07e-05	0.000612843
ADAM1A	1.41361	0.00207222	0.0131253
PCDHB11	1.41371	0.0151308	0.0539675
TRMT5	1.41373	0.00159939	0.0110252
TMEFF1	1.41411	0.0090207	0.0371062
SNORA74A	1.41476	0.00177451	0.0117744
RPS3	1.41477	0.00337245	0.0188357
SUDS3	1.41548	0.000147336	0.00222695
PAPD5	1.41558	0.00132789	0.00981699
SNORA84	1.41563	0.0163015	0.0571172
TPM3P9	1.4157	0.00431398	0.0222206
ZFP62	1.41624	0.0259552	0.0800934
SMAD2	1.41627	3.2e-07	3.76e-05
SLC25A40	1.41642	3.93e-05	0.000930671
BTC	1.41649	0.0304808	0.0900952
TMEM80	1.4165	0.000404849	0.00436939
HOXA1	1.41651	0.0346631	0.0989016
EXTL3	1.4168	0.0291172	0.0869809
WNT11	1.41685	0.00838054	0.035248
FAM117B	1.41691	0.00211743	0.0133326
CPSF7	1.41697	2.95e-05	0.000782917
TMTC4	1.41736	0.00701176	0.031054
PMS2P5	1.41763	0.00324752	0.0183453
C2orf42	1.41787	0.00016194	0.00237851
RAVER2	1.41791	0.000503966	0.00511014
GAN	1.41796	5.04e-05	0.00109071
METTL2B	1.41797	0.00214426	0.0134687
ZSCAN18	1.41823	0.000343397	0.00393481
ICA1	1.41842	1.73e-05	0.000536906
PCYOX1L	1.41843	0.000501922	0.0050991
MSANTD4	1.41873	0.00108726	0.0085523
TAGLN	1.41877	0.0385154	0.10664
SCAMP1	1.4188	0.000118232	0.00193672
SREBF2	1.41896	0.00141237	0.01017
DPH1	1.4192	0.000112789	0.00186173
TAS2R13	1.41927	0.0274571	0.0834314
BCL7B	1.41952	0.00700094	0.031033
RDX	1.41957	7.57e-09	3.49e-06
HGF	1.41975	0.0158984	0.0559784
DDX11	1.41978	0.0427116	0.114644
SNORA77	1.42024	0.00381184	0.0204354
LOC100506123	1.42063	0.0314144	0.0919702
ITPR3	1.42069	0.00951244	0.0387095
MTPAP	1.42077	0.000154824	0.00230771
LRRN4CL	1.42097	0.0238257	0.0751503
AKR1B1	1.42107	0.00603979	0.0278236
ATP7A	1.42131	0.000245988	0.00315942
NASP	1.42137	0.000371161	0.00413451
PRX	1.42142	0.00130536	0.00968925
CTRL	1.42149	0.0140987	0.0513505
ASNSD1	1.42161	2.25e-05	0.000644765
FHL1	1.42166	0.0447239	0.118614
NUP133	1.42181	0.000580481	0.00563372
ANKZF1	1.42189	0.000165685	0.00240944
SLC30A4	1.42233	1.14e-05	0.000408735
LOC646471	1.42266	0.00657072	0.0296659
FBXO48	1.42272	0.00210904	0.0132862
FAM124B	1.42278	0.0467817	0.122313
SEPT7P2	1.4231	7.9e-05	0.00145478
ZNF383	1.42343	6.98e-08	1.22e-05
ZNF696	1.42351	0.0117089	0.0450352
USP37	1.42353	8.5e-06	0.000339147
MAN2C1	1.42359	0.00129692	0.00963769
TRAK2	1.42366	4.6e-07	4.94e-05
BOC	1.42374	0.0031151	0.0177448
SACS	1.42396	3.08e-05	0.000806911
FAM190A	1.42465	0.000931822	0.00776849
LOC90246	1.42468	0.0289555	0.0866383
ZNF425	1.42473	0.00340751	0.0189587
DONSON	1.42505	0.0120616	0.0460216
MTHFD1	1.42513	0.00344825	0.019103
WASF3	1.42569	0.00845604	0.0354699
RPS6KL1	1.42573	0.0377081	0.104968
PDIK1L	1.4259	0.00954051	0.0387923
PAIP2B	1.42645	0.0103429	0.0412564
OCEL1	1.42653	0.00787426	0.0336894
NEK3	1.42688	0.00958717	0.0389033
ADRBK2	1.42769	0.0036362	0.0198126
CNOT3	1.42782	0.00039964	0.00433492
ORMDL3	1.42871	0.0399586	0.109602
ZNF569	1.42874	0.000451985	0.00474327
C11orf74	1.42974	1.29e-05	0.000440096
CELF2	1.42979	0.000280659	0.00343768
USP49	1.4298	0.00364199	0.0198187
KLF5	1.42986	0.0465506	0.122005
LINC00265	1.42998	0.000731906	0.00660199
SOX13	1.42998	0.00132869	0.00981724
LSM6	1.43017	0.000543617	0.00540602
RCL1	1.43025	0.0132953	0.0492584
PSMD7	1.43028	0.000301984	0.00360972
SMAD9	1.4304	0.00344059	0.019077
CSAD	1.43051	0.00452639	0.0230117
TTC8	1.43066	0.00116139	0.00894462
RFXAP	1.43087	0.000386647	0.00423761
ISY1	1.43097	1.05e-07	1.69e-05
IPO9	1.43123	0.000255491	0.00324275
ICOSLG	1.43127	0.00525326	0.0253874
LOC100505738	1.43171	0.000233309	0.00305057
USP5	1.43222	0.00826204	0.0348518
JMJD6	1.43264	0.0014344	0.0102407
C20orf111	1.43292	1.47e-06	0.000111497
CDC26	1.43321	5.64e-06	0.000252784
BUD13	1.43383	6e-06	0.000266047
TTC12	1.43418	0.00145979	0.0103419
PTRH1	1.43421	0.00752134	0.0326118
RASSF1	1.43423	0.0124577	0.047129
LINC00597	1.43429	0.0169361	0.0586986
ZNF274	1.43445	0.000451445	0.00474146
ADAM33	1.43446	0.0155657	0.05501
LINC00312	1.43481	0.00347001	0.0191824
PLA2G6	1.4349	0.0168138	0.0584413
C16orf88	1.43532	2.49e-06	0.000152451
CHCHD10	1.43551	0.0197504	0.0653687
CBWD6	1.43572	0.0151466	0.0539903
LOC100271836	1.43612	0.000493714	0.00506126
UGCG	1.43634	0.0192427	0.0641326
P2RY12	1.43639	0.0437451	0.116714
C1QTNF1	1.43641	0.00759977	0.0328832
CYB5R4	1.43643	0.00703322	0.0311013
USP28	1.43645	6.4e-06	0.000279884
ZFHX4	1.43656	0.00423639	0.0220038
CTDSPL2	1.43683	0.000169287	0.00244355
TMEM242	1.43712	0.00027905	0.00342789
ANKMY1	1.43729	0.00279226	0.0163755
CCNF	1.43734	0.0448175	0.118789
RIC3	1.43774	0.0481762	0.124912
MFSD8	1.43791	1.12e-05	0.000406975
MRS2P2	1.43793	0.006968	0.0309721
XYLB	1.43815	0.00074921	0.00668013
ZNF470	1.43872	0.000843007	0.00722545
SLC7A5P2	1.43873	0.000853394	0.00728475
DHTKD1	1.43876	0.000733703	0.00660435
DNPEP	1.43877	5.26e-05	0.0011217
ZNF37BP	1.4395	8.09e-05	0.00148078
RPL39	1.43993	0.000320845	0.00376497
RIC8B	1.44024	0.000114564	0.00188142
LIME1	1.44057	0.0347273	0.0990191
GEMIN8	1.44075	3.03e-05	0.000797227
ZNF10	1.44084	0.00966925	0.0391624
TFAP4	1.44096	4e-05	0.000935972
C21orf2	1.44096	0.0119173	0.0456463
ATHL1	1.44099	0.00960576	0.0389542
PPIG	1.44104	0.0001	0.00171757
RPRD1A	1.44138	0.000120105	0.00195781
LOC100131564	1.44189	0.0407992	0.111175
ZNF622	1.44194	5.27e-05	0.0011217
CA8	1.44246	0.0492688	0.126812
ATRIP	1.44254	0.00136775	0.0100028
DNAH1	1.44327	0.00456961	0.0231312
INTS6	1.44374	0.000612319	0.00582877
TTLL7	1.44397	0.0268979	0.0821575
DKC1	1.44413	9.19e-05	0.00162686
GCAT	1.44479	0.0148484	0.0532843
TSR2	1.44486	8.37e-05	0.00151501
LOC100506730	1.44489	0.00427592	0.0220742
CTTNBP2	1.44501	0.012088	0.0460952
RMRP	1.44521	0.00017662	0.00250225
SEH1L	1.44522	0.000489531	0.00503095
DLEU2L	1.44538	0.0168161	0.0584413
MLLT6	1.44554	5.37e-07	5.29e-05
BCKDHA	1.44588	0.00573334	0.0268235
DYM	1.44615	1.76e-07	2.52e-05
RABL3	1.44625	9.08e-05	0.00161263
FAM192A	1.44632	2.58e-06	0.000155855
TMEM120B	1.4464	0.0422554	0.113869
HOXD-AS2	1.4468	0.0159958	0.0562599
TAF4B	1.44696	0.00105163	0.00835867
MOV10	1.44698	3.69e-05	0.000888584
GNGT2	1.44714	0.0317952	0.0927067
WDR27	1.44775	0.00496871	0.0244049
ST13	1.4478	6.24e-05	0.00124485
MED31	1.44801	1.75e-06	0.000121736
LOC255512	1.4483	0.0430329	0.11529
QSOX2	1.44844	0.0132546	0.0491509
PCDHGB2	1.44864	0.0226625	0.0724797
ZNF76	1.44979	0.00526351	0.0254177
SIRT3	1.44999	0.00145288	0.0103199
FAM76B	1.45027	8.22e-05	0.00150132
MRPL4	1.45033	0.000422504	0.00451838
HNRNPC	1.45038	6.51e-06	0.000281874
OSTF1	1.45044	4.67e-05	0.00104272
RPS5	1.45046	8.56e-06	0.000339147
GATA3	1.45055	0.0294772	0.0878734
CHD2	1.451	6.39e-07	5.97e-05
POLL	1.45103	0.0382112	0.10594
MAPK14	1.45158	1.63e-08	5.12e-06
CCNG2	1.45171	0.00389826	0.0207414
NISCH	1.45194	1.39e-05	0.000464299
ISOC2	1.45219	0.00424732	0.0220377
EDC4	1.45276	0.000214584	0.00284379
MEIS2	1.45317	1.23e-05	0.000429876
B3GAT3	1.45355	0.00178304	0.0118028
FLJ46906	1.45407	0.00651266	0.0294656
LOC145783	1.45422	9.81e-05	0.00169529
FGD6	1.45448	0.000686966	0.00631725
SPCS1	1.45496	6.37e-05	0.00125718
SNORA46	1.45504	0.0139817	0.0510318
PMS2CL	1.45567	0.00110493	0.00863864
SNORA71D	1.456	0.00587593	0.0273026
ZCCHC14	1.45667	6.09e-06	0.000269005
VCPIP1	1.45682	1.4e-06	0.000109151
DDIT4	1.45784	0.0182328	0.0618525
MARS2	1.45805	0.00522489	0.0253354
SOX4	1.4587	0.0162654	0.0570288
CROCCP2	1.45929	0.0259553	0.0800934
CEP72	1.45973	0.00117088	0.00898556
COMTD1	1.45981	0.0187857	0.0631796
LOC100303749	1.46	0.0146452	0.0527897
ZNF155	1.46061	0.0369971	0.103686
DCAKD	1.4607	0.0424622	0.114291
EEF1B2	1.46115	0.000456928	0.00478736
NEK1	1.46208	4.44e-06	0.000222011
ECI2	1.46215	0.000264189	0.00330761
IPW	1.46233	0.00376883	0.0202785
KIT	1.46255	0.00490851	0.0241828
ZNF18	1.46256	0.000347441	0.00396181
MOB3B	1.46288	0.00973727	0.0393885
TASP1	1.46292	0.00476729	0.0237683
CCDC103	1.46313	0.0082505	0.0348259
QRICH1	1.46398	3.54e-05	0.000870338
ASAP3	1.46406	0.000199165	0.00269761
EHD3	1.46413	0.0205798	0.067371
PNN	1.46516	5.54e-05	0.00115221
MZT2A	1.46517	0.00677322	0.0303361
PPP1R7	1.46531	9.43e-06	0.000360675
CCDC138	1.46554	0.000318112	0.00374652
ZNF606	1.46561	0.0022972	0.0141336
LIAS	1.4657	0.00313892	0.0178568
FAS	1.46637	0.00871784	0.0362766
MTDH	1.46685	0.000106906	0.00178981
CLDND2	1.4669	0.0190151	0.063658
RIMKLB	1.46723	0.000392219	0.00426877
MBOAT1	1.46727	0.00158117	0.0109612
IL18BP	1.46801	0.00559285	0.0263765
ZBTB49	1.46802	0.00451387	0.0229785
NUP37	1.46853	4.56e-05	0.00102969
RNF180	1.4687	1.78e-05	0.000547664
ERI2	1.46878	0.000323588	0.00377469
NAPRT1	1.46888	0.000189979	0.00263966
UQCRBP1	1.46894	0.0310134	0.091127
C12orf45	1.46915	3.14e-05	0.000813486
SNORA16A	1.4698	0.000165756	0.00240944
MON1B	1.46992	0.00127424	0.00953127
PNPO	1.47003	0.00281721	0.0164993
PIK3R1	1.47009	0.00419331	0.0218607
CWC15	1.47062	1.11e-06	9.1e-05
LOC641367	1.47115	0.0336417	0.0965423
FLJ11235	1.47124	0.00846354	0.0354699
LAMB1	1.47131	0.00842422	0.0353856
KLHDC10	1.47146	0.000576342	0.00560619
CYB5RL	1.47204	0.00332751	0.0186503
ZNF682	1.47205	0.00602886	0.027793
ACCS	1.47226	0.0275061	0.0835213
ZNF3	1.4723	1.47e-06	0.000111497
PAOX	1.47244	0.00119134	0.00907347
TIMP4	1.47251	0.0118333	0.0454189
MLPH	1.47261	0.0109162	0.042896
GTF2H1	1.47293	3.15e-08	7.02e-06
TAS2R3	1.4731	0.037629	0.104882
THOC3	1.47342	0.00864943	0.0360733
RNF144A	1.47373	0.00127706	0.00953404
NME4	1.47471	0.0252113	0.0785677
FAM125A	1.4749	0.000169428	0.00244355
PPT2	1.47504	3.9e-05	0.000926551
MTA1	1.47505	3.94e-09	2.51e-06
SNRPD2	1.47517	2.16e-06	0.000137939
PHF15	1.47603	0.000303867	0.00362171
PARK2	1.47606	0.00893546	0.0368966
ARMCX3	1.47614	0.00128808	0.00958855
LY6G5B	1.47645	0.00376545	0.0202688
ACSS3	1.47656	0.0201082	0.0662642
TMEM136	1.4768	0.0171316	0.0591809
NBPF24	1.47689	0.000215676	0.00284949
LOC338799	1.47702	0.0349532	0.0995316
ZCCHC11	1.47745	0.000113896	0.00187761
SCARNA7	1.47894	2.26e-05	0.000646969
CCT2	1.47919	0.000207588	0.0027904
S100PBP	1.47947	0.000342764	0.0039328
ZNF34	1.47963	2.15e-06	0.000137939
POC5	1.47997	0.000193246	0.00265059
MRPL27	1.48004	0.00292432	0.0169346
SYNE2	1.48016	3.81e-05	0.000912285
AGAP5	1.48017	0.00354241	0.0194565
ZNF44	1.48026	0.000391548	0.00426877
SUMF1	1.48254	3.65e-05	0.000884964
CROCCP3	1.48258	0.00691501	0.030793
GLG1	1.48266	2.42e-05	0.000678823
RPL3	1.48266	1.32e-06	0.000104839
SPIN3	1.48267	0.00105365	0.00836959
NR3C1	1.48294	0.000281971	0.00344993
TAF8	1.48312	0.000677689	0.00625551
GPR160	1.48316	0.0142948	0.0518598
BEND5	1.48336	0.000957815	0.00787181
COX14	1.48337	0.0270281	0.0824383
SNORA70	1.4837	0.00510234	0.0248797
CCBP2	1.48388	0.0239747	0.0754978
NMI	1.48398	0.000688826	0.00632838
BIVM	1.4841	1.2e-05	0.000427215
DKFZP434I0714	1.48438	0.00581414	0.0271201
FAM165B	1.48442	9.64e-07	8.18e-05
NENF	1.48478	3.71e-07	4.26e-05
FBXW4P1	1.48548	0.00464163	0.0233588
PRKAG2-AS1	1.48569	0.00227215	0.0140129
RAB40C	1.48596	0.000400578	0.00434144
ZNF484	1.48603	6.3e-06	0.000277725
TJP2	1.4862	0.000225984	0.00296745
GRAMD1A	1.48664	0.00036866	0.00412362
GOLGA6L9	1.48715	0.0298973	0.0887977
PCDHGA9	1.48717	0.0040265	0.0212747
FLT1	1.48737	0.00121077	0.00917175
SUV420H2	1.48756	0.00453929	0.02305
GLTSCR2	1.48757	5.27e-07	5.28e-05
MAST2	1.4879	9.59e-05	0.0016722
MKNK1	1.48878	0.0045057	0.0229706
ZNF573	1.48943	0.000375353	0.00415885
SNORA71A	1.49053	0.00581772	0.0271201
MTMR9LP	1.49098	0.00210683	0.0132829
BARD1	1.49111	0.00502203	0.0245919
PABPN1	1.49122	3.67e-05	0.000886562
ZDHHC15	1.49152	0.0120516	0.0459972
C1orf115	1.49189	0.000898916	0.00756896
DGKH	1.4919	0.000369484	0.00412926
NUP155	1.492	5.06e-05	0.00109114
MRPS18C	1.49237	0.000234073	0.00305194
HADH	1.49242	0.0110286	0.0432171
BAG2	1.49254	0.000774989	0.0068377
YWHAG	1.49259	0.00955988	0.0388413
SNORA49	1.49291	1.97e-06	0.000133449
NET1	1.49304	0.0109168	0.042896
CTH	1.49311	0.0317587	0.0926672
TCIRG1	1.49355	0.00145349	0.0103199
LOC100129917	1.49369	0.0139263	0.0508949
ESCO1	1.49445	0.000909049	0.00763435
SATB1	1.49556	0.000624255	0.00590321
ACYP1	1.49682	0.000166393	0.00241055
PSPC1	1.49702	0.00293958	0.0169864
TAF9B	1.49739	9.67e-08	1.58e-05
IRX3	1.49744	0.00174853	0.0116522
ZC2HC1A	1.49767	1.74e-05	0.000538199
CYP4F12	1.49878	0.00933954	0.0381503
FSIP1	1.49886	0.0203593	0.0668528
FAM176C	1.49944	4.21e-05	0.000969978
CLEC2B	1.4995	8.32e-05	0.0015089
C17orf67	1.50077	0.00513299	0.0249648
TNFSF10	1.50101	4.89e-05	0.00106931
ZNF785	1.50122	0.000222087	0.00292222
JMJD7	1.50148	0.0115867	0.0447015
RPS9	1.50164	0.000119399	0.0019509
SNORA79	1.50187	0.00707436	0.0312405
TAS2R5	1.5021	0.0367538	0.103183
CCS	1.50211	0.00032372	0.00377469
MUM1	1.50247	5.7e-07	5.45e-05
ARL3	1.50297	2.09e-07	2.82e-05
PHKA1	1.50318	0.0388391	0.107283
APOOL	1.50333	0.000194051	0.00265059
PTCH1	1.50342	8.44e-06	0.000338478
NEDD8	1.50387	1.41e-05	0.000468521
OXNAD1	1.50391	0.000403109	0.00435425
C9orf123	1.50392	4.7e-05	0.00104558
LSS	1.50401	0.0138472	0.0506919
TNRC6A	1.50461	6.8e-05	0.00130911
SNORA12	1.50512	0.00427719	0.0220742
TNRC6C	1.50541	0.00190942	0.0124165
RP9	1.50619	6.78e-06	0.000286965
IRAK2	1.50641	0.00979698	0.0395928
ZNF446	1.50663	3.44e-05	0.000853248
TMSB4X	1.50676	0.000983528	0.00800971
BOK	1.50687	0.0102122	0.040874
CCNB1IP1	1.5076	0.00015876	0.00234739
CMTM8	1.50784	0.00835066	0.0351452
KPNB1	1.50826	1.46e-05	0.000476811
SCARNA15	1.50828	0.0271956	0.0828511
SFR1	1.509	0.000564631	0.00551447
PEX12	1.50911	0.0001917	0.00264179
SNORA5A	1.50914	0.0028565	0.0166614
PDCD6IP	1.50916	0.00571444	0.0267758
AEBP1	1.50931	0.00797637	0.0339574
TEKT4P2	1.50984	0.0348034	0.0991705
ZNF440	1.51028	0.00450864	0.0229706
ARRDC3	1.51092	0.000136175	0.00213671
NRM	1.51094	0.0107531	0.0424599
CYCS	1.51094	0.00109701	0.00860804
ZNF81	1.51108	0.0158485	0.0558332
ALDH1B1	1.51142	0.00072256	0.00653596
DNAJC17	1.51142	7.45e-05	0.00138995
ZNF141	1.51201	0.000207745	0.0027904
STX16	1.51214	1.73e-06	0.000121693
SMCR7L	1.51218	1.62e-05	0.000513698
CARD6	1.51224	0.000163646	0.0023957
FOXN2	1.51253	0.00104294	0.00832031
ABR	1.51282	0.00426742	0.02206
GAS8	1.51408	4.54e-06	0.000223829
LCORL	1.51485	1.44e-07	2.15e-05
APMAP	1.51516	0.000195806	0.00265831
NES	1.5153	0.00329205	0.0184997
NUP85	1.51563	2.56e-06	0.000155855
ZNF317	1.51729	6.02e-05	0.00122273
SEMA3A	1.51737	0.0277465	0.0840213
SCARNA3	1.51772	0.0421947	0.113729
SNTB1	1.51774	2.68e-05	0.00072168
COPS5	1.51775	9.37e-05	0.00165165
ZNF337	1.518	0.000933481	0.00777379
PODN	1.51842	0.00124746	0.00937808
RPL23AP82	1.5185	0.000172188	0.00246372
ANKRD28	1.52182	1.3e-07	1.97e-05
AACS	1.52195	0.0358876	0.101534
RCOR3	1.52307	3.24e-06	0.000181793
FST	1.52337	0.0120253	0.0459239
NPRL2	1.52356	0.000994339	0.00806739
SNORA31	1.52434	9.57e-05	0.00167138
SLC25A29	1.52456	0.00013596	0.00213671
EGFL8	1.52483	0.00079517	0.00694925
PPIL3	1.52533	0.000214156	0.00284103
C15orf62	1.52543	0.000593075	0.00570874
THADA	1.52606	6.12e-05	0.00123426
RNF157	1.5266	0.0475355	0.123807
DHRS7	1.5272	1.5e-06	0.000113385
KDELC1	1.52746	0.00790216	0.033792
CAMK2G	1.52773	0.000253886	0.00323192
LOC100506469	1.52873	0.013036	0.048703
NIPSNAP3B	1.52878	0.0464796	0.121943
PCDHGB8P	1.52898	0.00250949	0.0151155
ADCY4	1.5291	0.000669745	0.006215
IL17RC	1.52931	0.0123302	0.0467974
HIST1H4B	1.52956	5.43e-05	0.00114245
SERP2	1.52999	0.0198542	0.0655777
SNORA30	1.53037	0.00236466	0.0144454
GTF2H2C	1.53073	0.00254246	0.0152855
SNORA24	1.53089	0.0048698	0.0240933
SNHG8	1.53189	0.00122667	0.00927039
KIAA1468	1.53284	8.09e-06	0.00032724
TAS2R19	1.53315	0.00199014	0.0127868
EML3	1.53349	0.000192939	0.00265059
NUDT16	1.5336	0.00172917	0.0115708
FAM219B	1.53429	0.000128123	0.00205187
SNORA63	1.53437	0.000286526	0.00347736
SLC19A3	1.5352	0.0238937	0.0753162
SCARNA6	1.53632	3.58e-05	0.000877109
GAS5	1.53659	0.000605301	0.00578329
VMAC	1.53707	0.00480903	0.023875
SNORA43	1.53728	0.00100198	0.00811002
SLC2A6	1.53737	0.014163	0.0515121
SWT1	1.53737	1.75e-05	0.000539062
TYW1B	1.53793	0.018349	0.0620999
ALDH7A1	1.538	1.41e-05	0.000468521
RPS26	1.53812	0.0114673	0.044397
CMC4	1.53839	0.000854431	0.00728475
GPT2	1.53901	0.0144651	0.0523203
TAF10	1.54055	0.000622243	0.00589359
DNAJC9	1.54069	9.46e-05	0.00165494
FAM171B	1.54095	0.000437684	0.00464225
LOC728407	1.54107	0.000175705	0.0024978
IFITM4P	1.54108	0.0345372	0.0986686
GFRA1	1.54138	0.00199625	0.012788
PCDHGA2	1.54178	0.0151104	0.0539396
ANKRD10	1.54198	2.52e-07	3.22e-05
RNF5	1.54223	0.000622325	0.00589359
PRORSD1P	1.54327	0.0147212	0.0529538
GPATCH2L	1.54344	1.84e-05	0.000560016
AGAP2	1.54441	0.0128307	0.0482011
SAP30	1.54491	1.98e-05	0.000590145
PAPOLG	1.54555	2.34e-05	0.000659545
ZFP112	1.54579	0.00290359	0.0168599
TUFM	1.54594	0.000125802	0.00202728
EVC2	1.54627	0.000178973	0.00252192
PHB	1.54645	1.17e-06	9.47e-05
VARS2	1.54654	2.55e-08	6.2e-06
LOC100190986	1.54901	0.000610563	0.00582339
ZNF594	1.54936	0.0119331	0.0456664
PGS1	1.55039	2.3e-05	0.000652447
PATZ1	1.55356	1.36e-05	0.000456871
EPAS1	1.55427	0.00250746	0.0151103
ZNF615	1.5546	6.56e-06	0.000282146
IFT81	1.55522	0.00304349	0.0174293
C11orf92	1.55537	0.018006	0.0613057
ZNF639	1.55564	5.79e-08	1.13e-05
MAP1A	1.55593	0.00346602	0.0191685
SNORA52	1.55715	0.00363845	0.0198165
SCAI	1.5577	0.000102403	0.00173695
C5orf44	1.558	1.97e-06	0.000133449
GUSBP3	1.55828	5.18e-05	0.00111217
ZNF879	1.55913	0.000319828	0.00375855
LOC100630923	1.55967	0.00220452	0.0137468
SUGP2	1.56124	0.000283479	0.00345529
TNFRSF14	1.56185	0.000671689	0.00622104
RAMP2-AS1	1.56226	0.0128521	0.0482673
ZNF14	1.56382	1.63e-06	0.000119084
C21orf58	1.56389	0.0265355	0.0814034
TRHDE	1.56402	0.00243706	0.0147896
EDA	1.56437	0.00771233	0.0331836
PPP1R3E	1.56456	4.21e-05	0.000969978
COG7	1.56468	5.63e-05	0.00116042
CNKSR2	1.56588	0.0111663	0.0435189
ACOT2	1.56667	0.00278844	0.0163723
RRAGC	1.56696	3.59e-08	7.72e-06
ZNF621	1.56748	1.39e-05	0.000464299
LOC648987	1.56775	0.000121724	0.00197886
HRAS	1.56799	0.00119682	0.00909808
AMOTL1	1.56827	0.000146044	0.00222695
TCEB3C	1.56855	0.0402916	0.110191
C16orf3	1.56875	0.01351	0.0498451
ANXA3	1.56952	0.0155378	0.05501
NEURL4	1.56967	0.000126253	0.002032
ABCB1	1.57036	0.016234	0.0569425
CLASRP	1.57092	3.11e-06	0.000176892
LMOD1	1.57133	0.00434289	0.0223339
ST8SIA4	1.57151	0.0170098	0.0588323
PFN1P2	1.57239	0.000734516	0.00660706
C21orf119	1.57242	0.0013789	0.0100487
SRGAP1	1.57254	2.42e-05	0.000678823
ZNF613	1.57307	0.0136339	0.0501101
EIF3G	1.57344	7.91e-09	3.5e-06
FAU	1.57415	1.22e-07	1.92e-05
ENOSF1	1.57471	4.5e-05	0.00102075
TET2	1.57484	0.000196057	0.00265831
ORC2	1.57544	0.00381225	0.0204354
SSR4P1	1.57571	0.00236094	0.0144295
NT5C2	1.57634	2.03e-05	0.000604382
PTPLA	1.57655	0.0198464	0.0655777
MAGI3	1.57661	0.000331192	0.00384099
C6orf57	1.57794	2.06e-05	0.000612843
UQCRC1	1.58042	0.00410339	0.0215662
CCDC130	1.58145	3.07e-06	0.000175282
SLC2A13	1.58148	5.49e-05	0.00114901
VSTM4	1.58208	4.71e-07	4.94e-05
ANKRD39	1.58262	6.31e-05	0.00125097
RBM6	1.58509	7.68e-06	0.000313568
TMEM97	1.58525	0.00782799	0.0335582
ZNF880	1.58529	0.000378913	0.00417321
RNF144B	1.58533	0.000977634	0.00798184
SSPN	1.58556	0.00118878	0.00906654
SNORA21	1.58594	0.00349774	0.0192944
NBPF11	1.58608	3.66e-06	0.000195339
CDK3	1.58624	0.000209247	0.00279602
PTGR1	1.58629	0.000159428	0.0023545
NPIP	1.58635	0.00584314	0.0271991
MDN1	1.5871	2.25e-06	0.00014169
ARRB1	1.5873	0.000625811	0.00591359
PQLC1	1.58778	0.000291105	0.00351322
GLDN	1.58832	0.0152482	0.0542214
SPARCL1	1.58836	0.000299627	0.00359441
LOC100505648	1.58916	0.000157039	0.00232727
SPON1	1.58939	0.000189516	0.00263608
APITD1	1.58972	0.000270332	0.00335201
GOLGA8B	1.58991	0.0040596	0.021397
SLC39A14	1.59119	0.0440111	0.117218
CAPN2	1.59249	1.84e-05	0.000560016
TXNIP	1.59251	0.00263085	0.0156548
NDUFB7	1.59353	0.000269149	0.00334391
HRCT1	1.59356	0.0295506	0.0880719
LOC100506207	1.59357	0.000490637	0.0050383
PLD2	1.5943	0.000305617	0.00363586
SNHG12	1.59443	0.00351482	0.019372
SLC9A3R2	1.59481	0.00455597	0.0230984
HSD17B14	1.59559	0.0219476	0.0708073
DPM3	1.59696	0.00930405	0.0380854
IGF2BP2	1.59778	0.000376197	0.00416301
AGER	1.59893	0.000743363	0.0066588
C12orf75	1.59906	0.0306906	0.0904875
MAP4K4	1.60058	0.000176987	0.00250225
LAT	1.60091	0.00856034	0.0357364
C15orf41	1.601	5.5e-05	0.00114901
TM2D3	1.60131	0.000833266	0.00716098
PARP16	1.60148	4.68e-07	4.94e-05
C18orf8	1.60165	0.000105829	0.00178101
ATP5F1	1.60181	1.41e-06	0.000109151
PMS2P4	1.60181	0.000821561	0.00708871
PCDHB2	1.60212	9.91e-05	0.00170933
SPATA6	1.60224	2.5e-05	0.000690142
MORN2	1.60226	0.000958058	0.00787181
HNRNPA1L2	1.60261	5.23e-07	5.27e-05
TMEM25	1.60273	0.0296594	0.0882534
POLR3F	1.60293	6.37e-05	0.00125718
TYRO3P	1.60361	0.00085997	0.00731257
CREBZF	1.60651	1.85e-05	0.000560016
LOC100289230	1.60692	0.00106672	0.00845776
HOXB2	1.60825	0.00415335	0.0217226
ALKBH2	1.60885	3.96e-05	0.000932394
TAS2R14	1.60985	0.00142276	0.0101971
HSPA1L	1.61144	0.000182596	0.00256164
LPP	1.61179	1.39e-05	0.000464299
GCA	1.61192	0.00400827	0.0212218
FAM106A	1.61263	0.0101171	0.0406449
C9orf85	1.61369	6.43e-06	0.000279988
KLRAP1	1.61477	0.00810716	0.0344347
ADCK1	1.61478	0.00102393	0.0082297
PPOX	1.61498	0.000943881	0.00781267
RPL7L1	1.61517	6.93e-07	6.35e-05
ALDH1L1	1.61579	0.0242364	0.0762104
GGCT	1.61669	0.0096592	0.039134
OSBPL7	1.6169	0.00188527	0.0122948
ADCY5	1.61791	3.5e-06	0.000188889
MCCC1	1.61791	0.000489517	0.00503095
KLHDC1	1.61812	0.000208435	0.00279096
RPL23AP32	1.62046	0.00485276	0.0240274
FAM212A	1.62261	0.0139592	0.0509719
RNPC3	1.62287	0.000166606	0.00241093
CYB5A	1.62326	0.00136454	0.0100019
LDLRAD3	1.62466	0.00315608	0.0179466
ZNF22	1.62475	5.93e-08	1.14e-05
GATAD1	1.62533	1.75e-08	5.12e-06
MED30	1.62536	2.64e-06	0.000157769
LOC652276	1.6261	0.000451074	0.00474146
BMP5	1.6264	0.0363805	0.102466
FAM103A1	1.62688	7.55e-07	6.78e-05
MNS1	1.62732	9.61e-05	0.00167447
FOXN3-AS2	1.62812	0.00921139	0.0377925
ITGA10	1.62953	0.0233605	0.0741242
AMT	1.63003	0.000210212	0.00280023
ASPRV1	1.63172	0.00235359	0.0143913
SREK1	1.63175	1.4e-08	4.8e-06
ATAD3B	1.6318	0.00414289	0.021703
LPHN3	1.63261	0.00536894	0.0257151
GPCPD1	1.63267	3.04e-07	3.63e-05
CNPY2	1.63304	4e-06	0.000207503
UQCRH	1.63336	0.000588091	0.00567581
ABCA9	1.63561	1.21e-05	0.000427515
SETD4	1.63825	0.000579323	0.00562672
ZNF862	1.63835	0.00036561	0.00409661
PCDHB5	1.63847	0.000339802	0.00391622
HIST1H2AK	1.63923	0.00059393	0.00570924
MIR548I1	1.63974	0.0103985	0.0414272
ITPRIPL2	1.64029	5.46e-05	0.00114667
KLF8	1.64103	3.88e-06	0.000204285
IFT57	1.64138	5.59e-05	0.00115827
FRG1	1.64177	2.88e-06	0.00016537
MTERFD3	1.64209	2.85e-06	0.00016537
MIR143HG	1.6425	0.00324436	0.0183355
CCDC68	1.64349	0.00378989	0.0203494
LNX2	1.64386	0.000979707	0.00798867
CITED2	1.64474	0.0259649	0.0800953
SOGA2	1.64584	0.0101344	0.0406891
GRIPAP1	1.64611	0.000364294	0.00409627
C19orf44	1.6487	0.000251713	0.00321457
LIFR	1.65017	0.0324642	0.0940436
DIAPH2	1.65092	2.42e-08	6.01e-06
RBMX2	1.65096	1.73e-06	0.000121693
PMS2P3	1.65213	9.42e-07	8.11e-05
C17orf53	1.65221	0.0255151	0.0792848
CDKN1B	1.65247	2.77e-06	0.000163276
LOC440297	1.65309	0.0103404	0.0412564
SEC31B	1.65816	0.00670798	0.0301111
PLEKHH1	1.65829	0.0249103	0.0778241
LOC100192204	1.66051	0.0123475	0.0468358
WDR6	1.66131	0.000633567	0.00597813
DCLRE1C	1.66363	4.48e-07	4.86e-05
SNX29P2	1.66379	0.000182776	0.00256164
CELF6	1.66437	0.00041519	0.00445492
PACS2	1.66469	1.49e-05	0.000481322
WDR73	1.66495	7.4e-07	6.73e-05
METTL10	1.66543	3.39e-05	0.000850534
ECHDC2	1.66695	0.00103506	0.00827793
AQP7	1.667	0.000566666	0.00552874
DNM3OS	1.66775	0.00276264	0.0162683
ADAMTSL2	1.66866	0.0110224	0.0432171
MGC3771	1.66886	0.0111396	0.0434797
CLDN23	1.66894	3.89e-05	0.000926551
TRMT10C	1.66895	2.55e-05	0.00069841
MRPL48	1.66947	0.000284883	0.00346585
PRF1	1.66986	0.0164579	0.0575558
CACNA1H	1.67158	0.012664	0.0476999
FDPS	1.67256	3.29e-06	0.000182414
LOC286367	1.67273	0.0108687	0.0427984
GOLGA8I	1.67356	0.00293417	0.0169722
MOB2	1.67379	0.0280524	0.0846226
LENG9	1.67399	0.00102981	0.00825125
SNORA8	1.67405	0.00204086	0.0130027
TBX21	1.67417	0.0432647	0.115671
CYP4Z1	1.67454	0.00370305	0.0200723
SNORA1	1.6746	0.0131335	0.0489078
DNAJC27	1.67534	0.00010827	0.00180561
C5orf45	1.67556	1.99e-07	2.76e-05
GDPD3	1.67629	0.000142453	0.00219164
SLC7A5P1	1.67655	0.00891302	0.0368628
2018-09-04	1.67681	0.011595	0.0447038
UBQLNL	1.68071	0.00155399	0.0108309
LRP5L	1.68106	0.0120821	0.0460862
FSD1L	1.68114	0.00159308	0.0110024
PHKG1	1.682	0.00199447	0.012788
RPS15AP10	1.6834	0.000343549	0.00393481
AIP	1.68347	1.26e-06	0.000100397
KIAA2026	1.68442	1.79e-05	0.000548732
POT1	1.68735	4.98e-05	0.00108067
ZNF844	1.6883	6.81e-06	0.000287459
PNPLA7	1.68969	0.000195439	0.00265831
ADAT2	1.69041	0.000130356	0.0020799
CCDC53	1.69099	0.0386945	0.107067
MECOM	1.69124	0.000354626	0.00402596
DDR1	1.69139	0.00276132	0.016268
MUSTN1	1.69198	0.0129815	0.0486096
NLRP1	1.69223	2.31e-05	0.000653464
DDX42	1.69367	8.33e-08	1.4e-05
RAB11B-AS1	1.69374	0.00175551	0.0116865
TADA2A	1.69384	0.000190757	0.00264156
LOC100289561	1.6955	0.00266682	0.0158153
HHIP	1.69591	0.0409588	0.111422
KIAA0664L3	1.69958	0.00532349	0.0255887
C10orf131	1.70013	0.0042717	0.0220644
YLPM1	1.70069	3.87e-05	0.000924457
WDR17	1.70075	0.00149115	0.0104867
SERTAD4	1.70239	0.00729737	0.0319087
IZUMO4	1.70356	0.0022713	0.0140129
SNURF	1.70376	2.45e-05	0.000680601
KIAA0907	1.70516	5.46e-07	5.3e-05
PCDHGC3	1.70526	0.0023493	0.0143788
NHP2	1.70551	7.62e-05	0.00141609
COG3	1.70622	1.67e-08	5.12e-06
RPL32P3	1.70637	5e-05	0.00108262
OR10AD1	1.7065	0.023124	0.0735366
ACTG1P4	1.70869	0.00794487	0.0338792
SNORA10	1.71059	0.00484469	0.0239967
TTC13	1.71098	2.45e-07	3.2e-05
RNF217	1.71208	3.7e-05	0.000889934
SNORA67	1.71216	2.91e-05	0.000774854
CDC14B	1.71329	0.000502089	0.0050991
SPDYE7P	1.71371	0.00140725	0.0101684
SNORA28	1.71409	0.00100213	0.00811002
HIST2H2AC	1.71536	0.000131951	0.00209757
PFAS	1.71617	2.46e-06	0.000152451
LOC646168	1.71646	0.0483	0.125093
SULT1C4	1.71649	0.00615606	0.0282383
L1CAM	1.71663	0.00249021	0.0150338
SNORA9	1.71705	0.000249856	0.00319637
NPNT	1.71869	0.00397769	0.0211032
GOSR2	1.71886	0.000103542	0.00175167
SLCO4A1	1.71978	0.0375872	0.104857
GRIA3	1.71988	0.00469864	0.0235267
LOC91450	1.72073	0.018921	0.0634535
KIAA0355	1.721	0.000323297	0.00377469
SLC1A3	1.7211	0.000766194	0.00680195
TAS2R50	1.72133	0.00412346	0.0216452
GCFC1	1.72256	3.12e-05	0.000811626
LRRC49	1.72312	9.5e-06	0.000360675
HMGN3	1.72433	0.000222698	0.00292728
COMMD7	1.72541	6.96e-06	0.000290814
HSD17B13	1.72568	0.0120996	0.0461257
DIP2C	1.72573	3.9e-09	2.51e-06
GABRE	1.72771	0.000374051	0.0041587
KLHL33	1.73072	0.00592726	0.0274521
MCOLN3	1.73177	0.0113136	0.0439737
SNORA65	1.73196	4.32e-05	0.000990176
FRK	1.73289	0.00188594	0.0122948
MPZL2	1.73364	0.0280233	0.0846141
CUBN	1.73409	0.00100686	0.00813297
HIAT1	1.7353	4.03e-07	4.53e-05
SNORA2B	1.73609	0.00356428	0.0195445
ZXDC	1.73636	6.8e-08	1.2e-05
GTF2H2B	1.73693	0.0401066	0.109914
OFD1	1.73723	1.79e-08	5.12e-06
SRL	1.7385	0.0138952	0.0508243
C1orf229	1.73859	0.00301449	0.0173092
ZNF608	1.74003	5.43e-05	0.00114245
SNORA59A	1.74004	3.09e-05	0.000809811
AGBL3	1.74044	0.00300104	0.017255
MRPL42P5	1.74386	0.000932243	0.00776849
LRRC3	1.74403	0.0017591	0.0117044
MYH7B	1.74818	4.97e-05	0.00108067
FKBP1B	1.74856	0.00081203	0.00704415
LPIN3	1.7489	3.53e-05	0.000870193
NSUN5P1	1.75029	1.87e-07	2.65e-05
SARM1	1.75082	7.78e-07	6.88e-05
USP32P2	1.7542	0.0234591	0.0743433
YY1AP1	1.75512	0.00635819	0.0289596
RPS15A	1.756	1.41e-08	4.8e-06
DPP4	1.75843	0.0064533	0.0292586
LOC100170939	1.75935	0.00335534	0.0187736
NT5DC3	1.75992	0.000424637	0.00453368
CEMP1	1.76274	0.000140011	0.00216958
DPRXP4	1.76281	0.0038688	0.020613
CNKSR3	1.76407	0.000429459	0.00457759
COX4I1	1.76413	6.7e-06	0.000285701
SFI1	1.76477	7.05e-05	0.00134544
C4A	1.765	0.0464615	0.121921
LOC115110	1.76596	0.000477265	0.00494425
NCOR1	1.76675	1.43e-05	0.000474069
SNORA53	1.76731	0.00239472	0.0145714
KIAA1841	1.76732	0.00142691	0.0102212
CSTA	1.76881	0.000335689	0.00387573
VIPR2	1.77155	0.0374414	0.104586
LOC283683	1.7751	0.00351785	0.0193722
ZNF519	1.77983	0.000942928	0.00781267
UBXN8	1.78017	0.00189318	0.0123358
SUSD5	1.78031	0.0350891	0.0998523
DACT3	1.78201	0.0045348	0.0230363
WIBG	1.78264	1.41e-06	0.000109151
LOC100216545	1.78296	0.000300354	0.00359979
SNORA33	1.78298	0.000778902	0.00686285
PRUNE2	1.78573	0.0491653	0.126575
WDR66	1.79622	0.000991977	0.00805818
PHLDA3	1.79631	5.46e-07	5.3e-05
LOC441455	1.7968	0.0166631	0.0580062
SNORA47	1.79803	8.99e-06	0.000348361
SCARNA10	1.79982	6.22e-05	0.00124256
RBM20	1.8018	0.00139951	0.0101261
CHD7	1.80198	0.000174404	0.00248477
HES1	1.80373	0.000509772	0.00514953
DUSP4	1.80741	0.00107514	0.00850881
RPL32	1.81052	9.54e-09	3.97e-06
FAM114A2	1.81916	3.11e-07	3.69e-05
ANKRD36B	1.82058	5.49e-05	0.00114901
RNU12	1.82102	0.015559	0.05501
CRTAC1	1.8218	0.0420012	0.113397
TPO	1.82339	0.0255884	0.0793786
TRIM45	1.82393	0.00136035	0.00998826
CYP4B1	1.82514	0.015256	0.0542341
MYO19	1.8265	1.46e-06	0.000111497
LGR6	1.82681	0.00746927	0.0324405
PDDC1	1.82707	0.000305351	0.00363586
ASB13	1.83145	0.000102873	0.00174262
EIF3M	1.83601	6.45e-09	3.26e-06
GALNTL4	1.83638	9.02e-05	0.00160611
SNORA27	1.84131	0.000244275	0.00314681
LOC554206	1.84556	0.000547675	0.00542547
MRPS31P3	1.84657	2.2e-05	0.000635051
KRT8	1.84827	8.32e-05	0.0015089
MYCBP2	1.84869	2.19e-08	5.77e-06
SNRNP25	1.8488	0.00144515	0.0102777
PLLP	1.85455	0.000790409	0.00692515
ANKRD35	1.8584	1.73e-05	0.000536906
RPL36A	1.86007	2.51e-09	1.91e-06
FIBIN	1.868	0.000220514	0.00290449
GALT	1.87005	4.37e-05	0.000996952
KRTCAP3	1.87016	0.00209685	0.0132483
COL4A5	1.87231	0.00186018	0.0121946
ATP1A2	1.87578	0.00428112	0.0220778
CHKA	1.87686	1.34e-05	0.000451169
FAM50A	1.87724	4.52e-06	0.000223829
AKR1CL1	1.87749	0.00524626	0.0253874
HEBP2	1.88036	5.68e-08	1.13e-05
MPP3	1.88603	0.000139945	0.00216958
LINC00115	1.88635	2.09e-05	0.000613807
POLI	1.88795	1.72e-08	5.12e-06
NHS	1.88814	1.71e-07	2.48e-05
ZNF202	1.89721	1.44e-05	0.000474804
RPS18	1.90083	5.35e-10	8.63e-07
PPL	1.90169	0.00104728	0.00833944
MMP11	1.90311	0.00159441	0.0110057
TPSD1	1.90604	0.0445526	0.118282
ST3GAL3	1.90755	8.25e-05	0.00150441
LBH	1.91797	0.000131245	0.00208999
SRCIN1	1.92679	0.00404141	0.0213352
MGAT3	1.92728	0.00303172	0.0173926
ADAMTS13	1.92874	0.0019723	0.0127165
PFDN6	1.92993	1.06e-07	1.69e-05
GXYLT2	1.93259	0.000191518	0.00264179
PARP2	1.93337	6.66e-05	0.00129476
PAPPA2	1.9366	0.0142227	0.0516687
SNORA57	1.93778	0.00197585	0.012724
STON1	1.94301	1.87e-05	0.000564179
FBXO45	1.94542	1.65e-06	0.00011939
L3MBTL4	1.95365	8.7e-12	9.43e-08
PLCXD3	1.95561	0.000527406	0.00526858
RPS27	1.97234	5.14e-08	1.05e-05
SPEG	1.97476	0.0290482	0.0868351
BBC3	1.97564	0.000147251	0.00222695
ADAMTS3	1.97699	0.0014576	0.0103321
ABCA7	1.97937	0.000287572	0.00348542
GPR64	1.98089	0.0105332	0.0418391
GREB1L	1.98131	0.00420615	0.0219188
SNORA71B	1.99019	3.4e-06	0.000185305
ECHDC3	1.99708	0.00140773	0.0101684
ADRB2	1.9981	8.64e-05	0.0015561
SEC14L1P1	1.99972	1.37e-06	0.000108195
LPIN1	2.0037	0.00108577	0.0085523
CSDC2	2.00619	0.037556	0.104803
GDF15	2.00693	0.0199391	0.0658076
SNORA42	2.0148	2.73e-10	5.88e-07
D2HGDH	2.01661	2.38e-05	0.000669927
C17orf76-AS1	2.02141	0.00414455	0.021703
SNORA48	2.02545	4.68e-05	0.00104272
LDB3	2.03114	0.00235279	0.0143913
SNORA14A	2.03473	0.000397927	0.00431997
NEURL2	2.03482	0.000238538	0.00309142
MYOCD	2.03511	0.0032563	0.0183539
CNIH3	2.04002	0.00259036	0.015487
TRMT44	2.04034	1.47e-05	0.000479159
WDR85	2.04624	2.16e-06	0.000137939
IRF6	2.07777	0.00179405	0.0118431
PVRIG	2.08023	2.62e-07	3.31e-05
RDH13	2.08158	5.27e-06	0.000244503
SNORD17	2.08196	0.000147834	0.00222953
CCT6P1	2.08199	0.000110971	0.00184056
NRIP2	2.08256	0.001339	0.00988774
SNORA6	2.08435	2.29e-05	0.000650451
MSTO2P	2.08863	3.17e-06	0.000179189
AHSA2	2.09042	3e-07	3.62e-05
VWCE	2.09389	0.000920023	0.00770146
MYH11	2.09427	0.0253652	0.0789519
CALCRL	2.09589	0.00186666	0.0122123
LOC728392	2.09795	3.39e-06	0.000185305
LOC100288778	2.10193	9.06e-06	0.000349221
RRAD	2.11251	0.000449458	0.004736
LOC728643	2.1228	0.00354381	0.0194565
SBSPON	2.12475	0.0236266	0.0747114
PRKD1	2.14164	1.15e-06	9.35e-05
C1QTNF7	2.1431	7.37e-05	0.00138256
FAM185A	2.14854	0.000156285	0.00231935
EYA4	2.1527	0.0028276	0.0165353
STOX1	2.16899	0.00526706	0.0254253
SNORA62	2.18598	6.4e-05	0.00125724
SYT17	2.18863	0.00712214	0.0313763
BAI3	2.19183	1.44e-05	0.000474804
NTRK3	2.19725	0.00363518	0.0198126
LOC440173	2.19837	3.28e-05	0.000833126
SCN7A	2.24321	0.00986961	0.0398364
LOC100270804	2.25286	0.000307002	0.00364897
HSPA1B	2.26002	0.0073348	0.0320181
GLUL	2.26419	0.00478804	0.0238441
PTPN3	2.27679	2.33e-08	5.89e-06
SNORD94	2.27767	6.84e-06	0.000287662
RERGL	2.27939	0.00186396	0.012207
EPM2AIP1	2.28224	2.57e-05	0.000699423
APOL4	2.29361	0.0042164	0.0219457
SEMA3E	2.30942	8.18e-08	1.39e-05
ZNF224	2.31187	1.1e-06	9.07e-05
RPL13	2.35719	1.46e-11	9.43e-08
LOC647859	2.40705	0.0217463	0.0703247
CNN1	2.41043	0.00597204	0.0275902
CLDN1	2.4328	0.00202122	0.0129158
SNORA14B	2.4369	3.24e-05	0.000828045
ZNF385B	2.44157	0.000193249	0.00265059
PRRT2	2.4815	8.74e-06	0.000342999
OR2A42	2.52299	0.00544773	0.0259477
AGPAT9	2.56857	0.0147137	0.0529538
NPFF	2.70054	6.82e-07	6.31e-05
AMPH	2.74318	1.7e-06	0.000121648
SNHG1	2.816	4.87e-10	8.63e-07
PRODH	2.84473	9.38e-05	0.00165188
SLC6A15	2.94445	0.00151612	0.0106192
CETP	3.05647	0.00108304	0.0085452
MAP1LC3C	3.16577	2.49e-06	0.000152451
C21orf15	3.21734	0.000808871	0.00703406
RYR3	3.2718	2.15e-05	0.000625198
FCN2	3.29362	0.000386729	0.00423761
SOX10	3.31376	0.00118916	0.00906654
FAM70A	3.44622	1.45e-05	0.000475519
CXCL9	3.46598	0.00101366	0.00817257
C6	3.62484	0.000353788	0.00401998
KIAA1239	4.2766	0.000331778	0.00384434
LOC642929	4.62113	0.00720772	0.0316669
[truncated: 2 more rows]

## Sheet: Table S3
Supplementary Table S3. Canonical pathways for muscle related to Figure 4
Ingenuity Canonical Pathways	p-value	z-score	Molecules
LXR/RXR Activation	0.00295121	2.111	ARG2,CCL2,CD14,IL18,IL6,LBP,MMP9,MSR1,NGFR,PLTP,RBP4,SAA2
Apelin Cardiac Fibroblast Signaling Pathway	0.011749	2	IL6,SERPINE1,TGFB1,TGFB2
CXCR4 Signaling	0.0025704	-1.508	ADCY7,CD4,CXCR4,GNA15,GNAS,GNB4,GNB5,MAPK10,MYL5,PAK6,PIK3R1,PIK3R5,PLCB2,RASD1,RHOH
HOTAIR Regulatory Pathway	0.0245471	-1.508	CD44,COL1A1,COL1A2,EZH2,H3-3A/H3-3B,MMP11,MMP2,MMP9,PIK3R1,PIK3R5,TGFB1,WNT9A
FAT10 Cancer Signaling Pathway	0.00891251	-1.633	ACVR1C,CXCR4,IL6,NGFR,TGFB1,TGFB2
Glioma Invasiveness Signaling	0.000630957	-1.667	CD44,MMP2,MMP9,PIK3R1,PIK3R5,PLAUR,RASD1,RHOH,TIMP1,TIMP4
Sperm Motility	0.0074131	-1.667	ABHD3,CSF1R,EPHA3,EPHB3,ERBB3,FGFR1,GNAS,JAK2,LTK,MST1R,PDE1B,PDE4C,PDGFRA,PDGFRB,PLAAT4,PLCB2,PTK7
Gα12/13 Signaling	0.0331131	-1.667	CDH11,LPAR1,MAPK10,MYL5,PIK3R1,PIK3R5,RASD1,TBXA2R,VAV1,VAV2
PAK Signaling	2.63027e-05	-1.732	CFL2,EPHA3,EPHB3,ITGA4,MAPK10,MYL5,MYLK,PAK6,PDGFD,PDGFRA,PDGFRB,PIK3R1,PIK3R5,RASD1
Actin Cytoskeleton Signaling	0.00107152	-1.732	CD14,CFL2,FGF16,FN1,ITGA4,LBP,MYH10,MYH3,MYL5,MYLK,NCKAP1L,PAK6,PDGFD,PIK3R1,PIK3R5,RASD1,SLC9A1,VAV1,VAV2
Glioblastoma Multiforme Signaling	0.0057544	-1.732	E2F3,FOXO1,FZD10,FZD2,FZD5,PDGFD,PDGFRA,PDGFRB,PIK3R1,PIK3R5,PLCB2,RASD1,RHOH,WNT9A
Production of Nitric Oxide and Reactive Oxygen Species in Macrophages	0.0169824	-1.732	ARG2,JAK2,MAP3K10,MAPK10,MAPK13,MPO,NCF2,NCF4,NGFR,PIK3R1,PIK3R5,RBP4,RHOH,SPI1
cAMP-mediated signaling	0.000288403	-1.789	ADCY7,AKAP6,CAMK1D,GDPD1,GNAS,LPAR1,P2RY13,P2RY14,PDE10A,PDE1B,PDE3B,PDE4C,PDE6G,PDE8B,PTGER3,PTGIR,RGS2,RPS6KA1,SMPDL3A,TBXA2R,VIPR2
Senescence Pathway	0.00645654	-1.789	ACVR1C,ATF3,CAPN6,E2F3,EIF4EBP1,EZH2,FOXO3,GADD45G,IL6,ING1,PCGF2,PDK4,PIK3R1,PIK3R5,RASD1,RASSF5,SAA2,SERPINE1,TGFB1,TGFB2
Neuroinflammation Signaling Pathway	0.000354813	-1.877	ACVR1C,CCL2,CCL3,CD200R1,CSF1R,GDNF,GLUL,GRIN2D,IL18,IL6,IL6R,JAK2,KCNJ5,MAPK10,MAPK13,MMP9,NCF2,NLRP3,PIK3R1,PIK3R5,TGFB1,TGFB2,TLR7,TLR8,TYROBP
Complement System	7.94328e-05	-1.89	C1QA,C1QB,C1QC,C1R,C1S,C2,C3AR1,C5
Chemokine Signaling	0.0134896	-1.89	CAMK1D,CCL13,CCL2,CCL4,CXCR4,MAPK13,PLCB2,RASD1
PDGF Signaling	0.0199526	-1.89	INPP5J,JAK2,PDGFD,PDGFRA,PDGFRB,PIK3R1,PIK3R5,RASD1
SPINK1 General Cancer Pathway	7.58578e-05	-1.897	IL6,IL6R,JAK2,MT1A,MT1E,MT1G,MT1M,MT1X,PIK3R1,PIK3R5,RASD1
Role of Pattern Recognition Receptors in Recognition of Bacteria and Viruses	0.000398107	-1.897	C1QA,C1QB,C1QC,C3AR1,C5,IL18,IL6,MAPK10,NLRP3,OSM,PIK3R1,PIK3R5,TGFB1,TGFB2,TLR7,TLR8
Adrenomedullin signaling pathway	0.0114815	-1.941	ADCY7,GNA15,GNAS,IL18,MAPK10,MAPK13,MMP2,MYLK,PIK3R1,PIK3R5,PLCB2,RASD1,SHC2,SHC3,SHF
Colorectal Cancer Metastasis Signaling	6.91831e-05	-2.065	ADCY7,FZD10,FZD2,FZD5,GNAS,GNB4,GNB5,IL6,IL6R,JAK2,MAPK10,MMP11,MMP2,MMP9,PIK3R1,PIK3R5,PTGER3,RASD1,RHOH,TGFB1,TGFB2,TLR7,TLR8,WNT9A
Tec Kinase Signaling	0.00549541	-2.111	FCER1G,GNA15,GNAS,GNB4,GNB5,ITGA4,JAK2,MAPK10,PAK6,PIK3R1,PIK3R5,RHOH,VAV1,VAV2
ILK Signaling	0.0380189	-2.111	CFL2,FBLIM1,FN1,IRS2,ITGB8,MAPK10,MMP9,MYH10,MYH3,MYL5,PIK3R1,PIK3R5,RHOH
Role of NFAT in Cardiac Hypertrophy	0.0446684	-2.111	ADCY7,CAMK1D,GNAS,GNB4,GNB5,IL6,MAPK10,MAPK13,PIK3R1,PIK3R5,PLCB2,RASD1,TGFB1,TGFB2
Crosstalk between Dendritic Cells and Natural Killer Cells	0.00263027	-2.121	CD209,CD28,CD69,CD83,FSCN1,IL18,IL6,PRF1,TLR7,TYROBP
Cardiac Hypertrophy Signaling (Enhanced)	5.37032e-05	-2.137	ACVR1C,ADCY7,EIF4EBP1,FGF16,FGFR1,FGFRL1,FZD10,FZD2,FZD5,GDPD1,GNA15,GNAS,IL10RA,IL18,IL6,IL6R,IL7R,ITGA4,JAK2,MAP3K10,MAPK10,MAPK13,NGFR,OSM,PDE10A,PDE1B,PDE3B,PDE4C,PDE6G,PDE8B,PIK3R1,PIK3R5,PLCB2,RASD1,SMPDL3A,TGFB1,TGFB2,WNT9A
Acute Phase Response Signaling	1.65959e-07	-2.138	C1R,C1S,C2,C5,CRABP2,FN1,HP,IL18,IL6,IL6R,ITIH3,JAK2,LBP,MAPK13,NGFR,OSM,PIK3R1,RASD1,RBP1,RBP4,SAA2,SERPINE1,SOCS2,SOCS3
STAT3 Pathway	6.16595e-06	-2.138	CISH,FGFR1,HGF,IL10RA,IL6R,IL7R,JAK2,MAP3K10,MAPK10,MAPK13,NGFR,PDGFRA,PDGFRB,RASD1,SOCS2,SOCS3,TGFB1,TGFB2
HMGB1 Signaling	0.0057544	-2.309	CCL2,IL18,IL6,MAPK10,MAPK13,NGFR,OSM,PIK3R1,PIK3R5,RASD1,RHOH,SERPINE1,TGFB1,TGFB2
IL-8 Signaling	0.00588844	-2.309	EIF4EBP1,GNAS,GNB4,GNB5,MAP4K4,MAPK10,MMP2,MMP9,MPO,NCF2,PIK3R1,PIK3R5,PLCB2,RASD1,RHOH,VASP
Signaling by Rho Family GTPases	0.00380189	-2.324	CDC42EP5,CDH11,CFL2,CIT,GNA15,GNAS,GNB4,GNB5,ITGA4,MAP3K10,MAPK10,MYL5,MYLK,NCF2,PAK6,PIK3R1,PIK3R5,RHOH,SLC9A1
Apelin Liver Signaling Pathway	0.00042658	-2.449	COL18A1,COL1A1,COL1A2,COL3A1,MAPK10,PDGFRB
Intrinsic Prothrombin Activation Pathway	0.0057544	-2.449	COL18A1,COL1A1,COL1A2,COL3A1,F10,F13A1
GP6 Signaling Pathway	0.000831764	-2.496	COL18A1,COL1A1,COL1A2,COL28A1,COL3A1,COL5A1,COL5A2,COL6A1,COL6A2,COL8A1,FCER1G,PIK3R1,PIK3R5
Cardiac Hypertrophy Signaling	0.00323594	-2.5	ADCY7,GNA15,GNAS,GNB4,GNB5,IL6,IL6R,MAP3K10,MAPK10,MAPK13,MYL5,PIK3R1,PIK3R5,PLCB2,RASD1,RHOH,RPS6KA1,TGFB1,TGFB2
Leukocyte Extravasation Signaling	0.000107152	-2.524	CD44,CXCR4,ITGA4,MAPK10,MAPK13,MMP11,MMP2,MMP9,NCF2,NCF4,PIK3R1,PIK3R5,RASSF5,RHOH,THY1,TIMP1,TIMP4,VASP,VAV1,VAV2
Estrogen Receptor Signaling	0.0112202	-2.558	ADCY7,ARG2,CFL2,EIF4EBP1,FOXO1,FOXO3,GNA15,GNAS,JAK2,MDK,MMP11,MMP2,MMP9,MYL5,PIK3R1,PIK3R5,PLCB2,RASD1,RUNX2,SHC2,SHC3,SHF
Ephrin B Signaling	0.000501187	-2.646	CFL2,CXCR4,EPHB3,GNA15,GNAS,GNB4,GNB5,KALRN,VAV1,VAV2
HIF1α Signaling	0.00323594	-2.668	CAMK1D,EIF4EBP1,HGF,HK2,HSPA6,IL6,IL6R,MMP11,MMP2,MMP9,NCF2,PIK3R1,PIK3R5,RASD1,SERPINE1,TGFB1,TGFB2
Ephrin Receptor Signaling	0.0020893	-2.714	CFL2,CXCR4,EPHA3,EPHB3,GNA15,GNAS,GNB4,GNB5,GRIN2D,ITGA4,JAK2,KALRN,MAP4K4,PAK6,PDGFD,RASD1
Synaptogenesis Signaling Pathway	0.00630957	-2.837	ADCY7,CDH11,EIF4EBP1,EIF4EBP3,EPHA3,EPHB3,GRIN2D,KALRN,NLGN3,PIK3R1,PIK3R5,RASD1,SHC2,SHC3,SHF,SNCB,STXBP2,SYN2,SYT6,THBS2,THBS3,THBS4
IL-15 Production	0.00295121	-2.887	CSF1R,EPHA3,EPHB3,ERBB3,FGFR1,IL6,JAK2,LTK,MST1R,PDGFRA,PDGFRB,PTK7
Dendritic Cell Maturation	0.000954993	-3	CD83,COL18A1,COL1A1,COL1A2,COL3A1,FCER1G,FSCN1,IL18,IL6,JAK2,MAPK10,MAPK13,NGFR,PIK3R1,PIK3R5,PLCB2,TYROBP
Systemic Lupus Erythematosus In B Cell Signaling Pathway	3.71535e-05	-3.138	FOXO1,FOXO3,IL18,IL6,IL6R,INPP5J,IRF5,ISG15,JAK2,LILRB4,MAP4K4,OSM,PAG1,PIK3R1,PIK3R5,PLAAT4,RASD1,SHC2,SHC3,SHF,TGFB1,TGFB2,TLR7,TLR8,TRAF4,VAV1
TREM1 Signaling	0.000162181	-3.317	CCL2,CCL3,CD83,IL18,IL6,JAK2,MPO,NLRP3,TLR7,TLR8,TYROBP
Hepatic Fibrosis Signaling Pathway	6.91831e-08	-3.55	ACVR1C,CCL2,CCL3,COL18A1,COL1A1,COL1A2,COL3A1,EZH2,FGFR1,FOXO1,FZD10,FZD2,FZD5,GLIS2,IL18,IRS2,ITGA4,JAK2,MAPK10,MAPK13,MYL5,MYLK,NCF2,NGFR,PDGFD,PDGFRA,PDGFRB,PIK3R1,PIK3R5,RASD1,RHOH,SERPINE1,SUCNR1,TFRC,TGFB1,TGFB2,TIMP1,WNT9A

## Sheet: Table S4
Supplementary Table S4. Canonical pathways for adipose tissue related to Figure 4
Ingenuity Canonical Pathways	p-value	z-score	Molecules
PDGF Signaling	0.00281838	-2.673	ABL2,HRAS,INPP5D,INPP5K,OCRL,PIK3C2A,PIK3CB,PIK3CG,PIK3R1,PIK3R2,PIK3R5,RALA,RAP2A,RASD2,SOS2
GP6 Signaling Pathway	9.77237e-05	-1.706	CAMK4,COL12A1,COL15A1,COL1A1,COL1A2,COL4A4,COL4A5,COL5A1,COL6A1,GSK3A,LAMA4,LAMB1,LAT,PIK3C2A,PIK3CB,PIK3CG,PIK3R1,PIK3R2,PIK3R5,PRKD1,PTK2,RHOG
Acute Phase Response Signaling	0.00724436	-2.524	C4A/C4B,CEBPB,FN1,HMOX1,HP,HRAS,IL1RN,IL6,MAP2K3,MAPK14,NR3C1,OSM,PIK3CB,PIK3CG,PIK3R1,PIK3R2,RALA,RAP2A,RASD2,SOCS2,SOS2,TNF,TNFRSF1A
CXCR4 Signaling	0.00234423	-2.132	ADCY4,ADCY5,ADCY7,ARHGEF11,ATP,CXCR4,GNA12,HRAS,ITPR3,PIK3C2A,PIK3CB,PIK3CG,PIK3R1,PIK3R2,PIK3R5,PLCB2,PRKD1,PTK2,RALA,RAP2A,RASD2,RHOB,RHOG,RND3
HMGB1 Signaling	2.75423e-05	-2.6	AGER,CXCL8,EDA,HMGB1,HRAS,ICAM1,IL6,KAT2A,KAT6A,KAT7,MAP2K3,MAPK14,OSM,PIK3C2A,PIK3CB,PIK3CG,PIK3R1,PIK3R2,PIK3R5,RALA,RAP2A,RASD2,RHOB,RHOG,RND3,TNF,TNFRSF1A,TNFSF10
IL-8 Signaling	6.0256e-06	-2.959	ANGPT1,ARRB2,CCND2,CXCL1,CXCL8,CXCR2,FLT1,GNA12,GPLD1,HBEGF,HMOX1,HRAS,ICAM1,IRAK2,LASP1,MAP4K4,PIK3C2A,PIK3CB,PIK3CG,PIK3R1,PIK3R2,PIK3R5,PLCB2,PLD2,PLD4,PRKD1,PTGS2,PTK2,RALA,RAP2A,RASD2,RHOB,RHOG,RND3
Senescence Pathway	0.00281838	-1.768	ACVR1B,ATM,CAMK4,CAPN2,CCNB2,CDC26,CDC27,CDKN1B,CDKN2B,CEBPB,CXCL8,E2F1,HRAS,IL6,ING1,ITPR3,ITSN2,MAP2K3,MAPK14,NFATC3,PDK3,PDK4,PIK3C2A,PIK3CB,PIK3CG,PIK3R1,PIK3R2,PIK3R5,PPP2CA,RALA,RAP2A,RASD2,SMAD2,SMAD9
Cardiac Hypertrophy Signaling (Enhanced)	0.00109648	-1.941	ACVR1B,ADCY4,ADCY5,ADCY7,ADRB2,ATP,CAMK2G,CAMK4,CXCL8,CXCR2,DIAPH2,EDA,EDNRB,FGF1,FGF12,FZD2,FZD5,FZD6,FZD9,GNA12,GSK3A,HDAC9,HRAS,IL17RC,IL6,IL7R,ITPR3,MAP2K3,MAPK14,MKNK1,MYOCD,NFATC3,OSM,PDE7B,PIK3C2A,PIK3CB,PIK3CG,PIK3R1,PIK3R2,PIK3R5,PKN1,PLCB2,PRKD1,PTGS2,PTK2,RALA,RAP2A,RASD2,RPS6KB2,RYR1,RYR3,TNF,TNFRSF1A,TNFSF10,WNT11,WNT2B
Tumoricidal Function of Hepatic Natural Killer Cells	0.00676083	2	CYCS,FAS,ICAM1,LYVE1,PRF1,SERPINB9
Apelin Endothelial Signaling Pathway	0.000645654	-2.524	ADCY4,ADCY5,ADCY7,ANGPT1,APLNR,CAMK4,HRAS,ICAM1,PIK3C2A,PIK3CB,PIK3CG,PIK3R1,PIK3R2,PIK3R5,PLCB2,PRKD1,RALA,RAP2A,RASD2,RPS6KB2
Role of p14/p19ARF in Tumor Suppression	0.000891251	2.121	E2F1,PIK3C2A,PIK3CB,PIK3CG,PIK3R1,PIK3R2,PIK3R5,TTF1
IL-9 Signaling	0.00223872	-1.89	PIK3C2A,PIK3CB,PIK3CG,PIK3R1,PIK3R2,PIK3R5,SOCS2,TNF
PCP pathway	0.0114815	-2.53	DAAM1,FZD2,FZD5,FZD6,FZD9,JUNB,JUND,PFN2,WNT11,WNT2B
BAG2 Signaling Pathway	0.00134896	1.667	ANXA2,ATP,BAG2,HSPA14,HSPA1A/HSPA1B,HSPA1L,MAPK14,MAPT,PRKN,SIRT3
Actin Nucleation by ARP-WASP Complex	0.0158489	-2.333	ARPC3,GNA12,HRAS,RALA,RAP2A,RASD2,RHOB,RHOG,RND3,SOS2,WIPF1
IL-2 Signaling	0.00588844	-1.897	HRAS,PIK3C2A,PIK3CB,PIK3CG,PIK3R1,PIK3R2,PIK3R5,RALA,RAP2A,RASD2,SOS2
Antiproliferative Role of Somatostatin Receptor 2	0.0151356	-1.897	CDKN1B,CTH,HRAS,PIK3C2A,PIK3CB,PIK3CG,PIK3R1,PIK3R2,PIK3R5,RALA,RAP2A,RASD2
IL-15 Signaling	0.0030903	-1.941	CXCL8,HRAS,MAPK14,PIK3C2A,PIK3CB,PIK3CG,PIK3R1,PIK3R2,PIK3R5,RALA,RAP2A,RASD2,RPS6KB2
Neurotrophin/TRK Signaling	0.000758578	-1.941	HRAS,MAP2K3,NTRK3,PIK3C2A,PIK3CB,PIK3CG,PIK3R1,PIK3R2,PIK3R5,RALA,RAP2A,RASD2,RPS6KA1,SOS2,SPRY2
Aryl Hydrocarbon Receptor Signaling	0.047863	-2.309	AIP,ALDH1B1,ALDH1L1,ALDH7A1,ATM,CCND2,CDKN1B,CYP1A1,E2F1,FAS,IL6,MGST3,NEDD8,NFE2L2,RXRA,SMARCA4,TNF
Sphingosine-1-phosphate Signaling	0.0074131	-2	ADCY4,ADCY5,ADCY7,ASAH1,CASP10,GNA12,PIK3C2A,PIK3CB,PIK3CG,PIK3R1,PIK3R2,PIK3R5,PLCB2,PTK2,RHOB,RHOG,RND3
UVA-Induced MAPK Signaling	0.000295121	-2.309	ATM,CYCS,HRAS,MAPK14,PARP16,PARP2,PIK3C2A,PIK3CB,PIK3CG,PIK3R1,PIK3R2,PIK3R5,PLCB2,RALA,RAP2A,RASD2,RPS6KA1,RPS6KB2
p70S6K Signaling	0.0020893	-2.183	BCAP31,CD79A,F2R,HRAS,MAPT,PIK3C2A,PIK3CB,PIK3CG,PIK3R1,PIK3R2,PIK3R5,PLCB2,PPP2CA,PRKD1,RALA,RAP2A,RASD2,SOS2,YWHAE,YWHAG
Gαq Signaling	0.0204174	-2.065	CAMK4,EPM2A,GPLD1,GRK2,HMOX1,ITPR3,NFATC3,PIK3C2A,PIK3CB,PIK3CG,PIK3R1,PIK3R2,PIK3R5,PLCB2,PLD2,PLD4,PRKD1,RHOB,RHOG,RND3
IL-6 Signaling	3.80189e-05	-2.4	ABCB1,CD14,CEBPB,COL1A1,CXCL8,HRAS,IL1RN,IL6,MAP2K3,MAP4K4,MAPK14,PIK3C2A,PIK3CB,PIK3CG,PIK3R1,PIK3R2,PIK3R5,RALA,RAP2A,RASD2,SOS2,TNF,TNFRSF1A
Integrin Signaling	0.0436516	-1.964	ARF4,ARPC3,CAPN2,HRAS,ITGA10,MPRIP,MYLK,PFN2,PIK3C2A,PIK3CB,PIK3CG,PIK3R1,PIK3R2,PIK3R5,PTK2,RALA,RAP2A,RASD2,RHOB,RHOG,RND3,SOS2,WIPF1
Regulation Of The Epithelial Mesenchymal Transition In Development Pathway	0.0436516	-2.53	BCL9,FZD2,FZD5,FZD6,FZD9,GLI3,LOX,PTCH1,PYGO2,WNT11,WNT2B
NRF2-mediated Oxidative Stress Response	0.000691831	-2.324	ABCC4,AOX1,CYP4Z1,DNAJB4,DNAJC17,DNAJC9,GCLC,HMOX1,HRAS,JUNB,JUND,MAP2K3,MAPK14,MGST3,NFE2L2,PIK3C2A,PIK3CB,PIK3CG,PIK3R1,PIK3R2,PIK3R5,PRKD1,RALA,RAP2A,RASD2,TXNRD1,VCP
Endothelin-1 Signaling	0.000977237	-2.117	ADCY4,ADCY5,ADCY7,ATP,CASP10,EDNRB,GNA12,GPLD1,HMOX1,HRAS,ITPR3,MAPK14,PIK3C2A,PIK3CB,PIK3CG,PIK3R1,PIK3R2,PIK3R5,PLA2G6,PLAAT3,PLCB2,PLD2,PLD4,PRKD1,PTGS2,RALA,RAP2A,RASD2
mTOR Signaling	8.51138e-06	-2.4	DDIT4,EIF3G,EIF3M,EIF4B,EIF4G1,FAU,GPLD1,HMOX1,HRAS,PIK3C2A,PIK3CB,PIK3CG,PIK3R1,PIK3R2,PIK3R5,PLD2,PLD4,PPP2CA,PRKD1,RALA,RAP2A,RASD2,RHOB,RHOG,RND3,RPS15A,RPS18,RPS2,RPS26,RPS27,RPS3,RPS5,RPS6KA1,RPS6KB2,RPS9
IL-23 Signaling Pathway	0.040738	-1.89	PIK3C2A,PIK3CB,PIK3CG,PIK3R1,PIK3R2,PIK3R5,TNF
Apelin Pancreas Signaling Pathway	0.0446684	-1.89	APLNR,PIK3C2A,PIK3CB,PIK3CG,PIK3R1,PIK3R2,PIK3R5
fMLP Signaling in Neutrophils	0.00870964	-1.807	ARPC3,CAMK4,FPR3,HRAS,ITPR3,NFATC3,PIK3C2A,PIK3CB,PIK3CG,PIK3R1,PIK3R2,PIK3R5,PLCB2,PRKD1,RALA,RAP2A,RASD2
Thrombin Signaling	0.00107152	-1.8	ADCY4,ADCY5,ADCY7,ARHGEF11,CAMK2G,CAMK4,F2R,GATA3,GNA12,HRAS,ITPR3,MAPK14,MPRIP,MYLK,PIK3C2A,PIK3CB,PIK3CG,PIK3R1,PIK3R2,PIK3R5,PLCB2,PRKD1,PTK2,RALA,RAP2A,RASD2,RHOB,RHOG,RND3
CNTF Signaling	0.000204174	-1.732	HRAS,LIFR,PIK3C2A,PIK3CB,PIK3CG,PIK3R1,PIK3R2,PIK3R5,RALA,RAP2A,RASD2,RPS6KA1,RPS6KB2
GDNF Family Ligand-Receptor Interactions	0.0017378	-1.732	DOK2,GFRA1,HRAS,ITPR3,PIK3C2A,PIK3CB,PIK3CG,PIK3R1,PIK3R2,PIK3R5,RALA,RAP2A,RASD2,SOS2
Cholecystokinin/Gastrin-mediated Signaling	0.0042658	-1.698	GNA12,HRAS,IL1RN,ITPR3,MAP2K3,MAPK14,PLCB2,PRKD1,PTGS2,PTK2,RALA,RAP2A,RASD2,RHOB,RHOG,RND3,SOS2,TNF
CD40 Signaling	0.0199526	-1.667	ICAM1,MAP2K3,MAPK14,PIK3C2A,PIK3CB,PIK3CG,PIK3R1,PIK3R2,PIK3R5,PTGS2
Oncostatin M Signaling	0.0120226	-1.633	CHI3L1,EPAS1,HRAS,OSM,PLAU,RALA,RAP2A,RASD2
Leptin Signaling in Obesity	0.0269153	-1.633	ADCY4,ADCY5,ADCY7,ATP,PIK3C2A,PIK3CB,PIK3CG,PIK3R1,PIK3R2,PIK3R5,PLCB2
Superpathway of D-myo-inositol (1,4,5)-trisphosphate Metabolism	0.0275423	-1.633	ATP,BPNT2,INPP5D,INPP5K,ITPKC,OCRL
14-3-3-mediated Signaling	2.13796e-05	-1.606	CDKN1B,GSK3A,HRAS,MAPT,PDCD6IP,PIK3C2A,PIK3CB,PIK3CG,PIK3R1,PIK3R2,PIK3R5,PLCB2,PRKD1,RALA,RAP2A,RASD2,RPS6KA1,TNF,TNFRSF1A,TUBA1C,TUBB2A,TUBB2B,YWHAE,YWHAG
Regulation Of The Epithelial Mesenchymal Transition By Growth Factors Pathway	0.0371535	-1.606	FGF1,FGF12,HGF,HRAS,IL6,MAP2K3,MAPK14,PIK3C2A,PIK3CB,PIK3CG,PIK3R1,PIK3R2,PIK3R5,RALA,RAP2A,RASD2,SMAD2,SOS2,TNF,TNFRSF1A,TNFSF10
JAK/Stat Signaling	0.000660693	-1.604	CEBPB,HRAS,IL6,PIAS3,PIK3C2A,PIK3CB,PIK3CG,PIK3R1,PIK3R2,PIK3R5,RALA,RAP2A,RASD2,SOCS2,SOS2
Glioma Signaling	0.0057544	-1.604	CAMK2G,CAMK4,CDKN2B,E2F1,HRAS,IGF2,PIK3C2A,PIK3CB,PIK3CG,PIK3R1,PIK3R2,PIK3R5,PRKD1,RALA,RAP2A,RASD2,SOS2
Osteoarthritis Pathway	0.018197	-1.528	AGER,ALPL,ANXA2,ATP,CASP10,CEBPB,CXCL8,CXCR2,DDIT4,EPAS1,FN1,FZD2,FZD5,FZD6,FZD9,GLI3,HES1,HMGB1,OCRL,PTCH1,PTGS2,SMAD2,SMAD9,TNF,TNFRSF1A
Regulation of eIF4 and p70S6K Signaling	0.000123027	-1.508	EIF3G,EIF3M,EIF4G1,FAU,HRAS,MAPK14,MKNK1,PIK3C2A,PIK3CB,PIK3CG,PIK3R1,PIK3R2,PIK3R5,PPP2CA,RALA,RAP2A,RASD2,RPS15A,RPS18,RPS2,RPS26,RPS27,RPS3,RPS5,RPS9,SOS2
ErbB2-ErbB3 Signaling	0.000794328	-1.508	CDKN1B,GSK3A,HRAS,PIK3C2A,PIK3CB,PIK3CG,PIK3R1,PIK3R2,PIK3R5,RALA,RAP2A,RASD2,SOS2
ErbB4 Signaling	0.0042658	-1.508	HRAS,PIK3C2A,PIK3CB,PIK3CG,PIK3R1,PIK3R2,PIK3R5,PRKD1,RALA,RAP2A,RASD2,SOS2
FcγRIIB Signaling in B Lymphocytes	0.00489779	-1.508	CACNA1H,CD79A,HRAS,INPP5D,PIK3C2A,PIK3CB,PIK3CG,PIK3R1,PIK3R2,PIK3R5,RALA,RAP2A,RASD2
GM-CSF Signaling	0.00537032	-1.508	CAMK2G,HRAS,PIK3C2A,PIK3CB,PIK3CG,PIK3R1,PIK3R2,PIK3R5,RALA,RAP2A,RASD2,SOS2
ErbB Signaling	0.000467735	-1.5	AREG,BTC,HBEGF,HRAS,MAP2K3,MAPK14,PIK3C2A,PIK3CB,PIK3CG,PIK3R1,PIK3R2,PIK3R5,PRKD1,RALA,RAP2A,RASD2,SOS2
SAPK/JNK Signaling	0.00134896	-1.5	DUSP10,DUSP4,GNA12,HRAS,MAP4K1,MAP4K4,NFATC3,PIK3C2A,PIK3CB,PIK3CG,PIK3R1,PIK3R2,PIK3R5,RALA,RAP2A,RASD2,SOS2

## Sheet: Table S5
Supplementary Table S5: List of muscle genes correlated with CWLG related to Figure 7
Gene	r-value	p-value
FAM218A	0.725404	8.97473e-05
RNF138	0.722036	0.000100333
SH3BGRL2	0.700992	0.0001946
KDM6B	0.684873	0.000311693
CARD11	0.678741	0.000370069
AMD1	0.678598	0.000371536
CTSW	0.664333	0.000545621
HIST1H1D	0.655859	0.000679175
C4A	0.649091	0.000805161
MAEA	0.642711	0.000941754
MCF2L	0.639174	0.00102571
FOXO1	0.634804	0.0011382
ZNF805	0.626349	0.00138603
TMC8	0.625983	0.00139773
IRAK3	0.625623	0.00140931
NMT2	0.622559	0.00151124
NOSTRIN	0.620882	0.00156964
FOXO3	0.620075	0.00159843
SNORA43	0.618055	0.00167244
PPP1R8	0.61738	0.00169782
VWA3B	0.612415	0.00189475
FGGY	0.609866	0.00200313
WDR85	0.604452	0.00225101
PITPNC1	0.599542	0.00249776
TBPL1	0.598644	0.00254526
ZNF324	0.598538	0.00255095
ZNF254	0.598216	0.00256819
SNORA74B	0.589887	0.00305016
PIK3R1	0.589189	0.00309383
ZNF14	0.588817	0.00311727
SNORA47	0.587306	0.00321414
LOC286094	0.587266	0.00321675
ACD	0.587047	0.00323101
SNORD17	0.585023	0.0033654
TAL1	0.584338	0.00341193
EMCN	0.58415	0.00342475
COL24A1	0.583399	0.00347655
ZNF366	0.58293	0.00350923
LATS2	0.582535	0.00353697
GIMAP4	0.582431	0.00354427
SCUBE1	0.581956	0.00357793
SNORA9	0.5817	0.00359613
LRRC69	0.580841	0.00365792
EPHA2	0.578178	0.00385514
MFNG	0.575533	0.00405976
MAP3K5	0.573575	0.00421706
CDH19	0.573276	0.00424151
APBB1IP	0.573271	0.00424192
SASH1	0.57307	0.00425851
PER2	0.572624	0.00429528
ABI3	0.571628	0.00437857
C10orf131	0.570437	0.00447987
SDPR	0.569864	0.00452929
RMRP	0.569423	0.00456763
ROBO4	0.568219	0.00467375
SNORD94	0.567592	0.00472979
SESN1	0.567216	0.00476366
CCDC68	0.566615	0.00481824
CERS2	0.566251	0.00485154
TMEM106C	0.564635	0.00500185
PPRC1	0.563635	0.00509674
CORO2A	0.563269	0.00513186
LOC339803	0.562788	0.00517832
DIXDC1	0.56207	0.00524832
PLCG1	0.561452	0.00530918
ALDH18A1	0.560161	0.00543823
ZNF282	0.557498	0.00571278
FOXO3B	0.556388	0.00583064
UCKL1	0.556361	0.00583348
ELMO1	0.553823	0.00611061
HSPA12B	0.553552	0.0061408
TEK	0.553338	0.00616479
TOB2	0.553133	0.00618783
FLT4	0.550879	0.00644574
ING5	0.55011	0.00653568
LYL1	0.550047	0.00654314
OCIAD2	0.549971	0.00655212
RNF207	0.549484	0.00660974
SNORA71C	0.549332	0.00662786
ITPR3	0.549152	0.00664932
CXorf36	0.549112	0.00665408
DGKA	0.54863	0.00671192
ZBTB8A	0.547628	0.00683335
SLC39A8	0.544783	0.00718835
SGCE	0.542325	0.00750725
IGFBP4	0.542313	0.00750878
HNRNPF	0.54159	0.00760479
PTCH1	0.541279	0.00764648
GOLGA7	0.540763	0.00771596
LPIN3	0.540142	0.00780015
SNORA5A	0.540011	0.007818
SMIM3	0.539912	0.00783157
SNORA8	0.53919	0.00793093
PTH2R	0.538747	0.00799228
PPIL1	0.538442	0.00803491
RPS14	0.538112	0.00808108
DGKH	0.537526	0.00816362
TINAGL1	0.536649	0.00828871
DOCK9	0.536031	0.00837767
HACE1	0.535997	0.0083826
WDR48	0.535548	0.00844783
EPAS1	0.532905	0.0088401
PPP1R35	0.532585	0.00888849
ICAM3	0.531188	0.0091029
GLUL	0.530446	0.00921841
CD72	0.53037	0.00923028
WNT9A	0.530267	0.00924648
ECSCR	0.530237	0.00925118
ACIN1	0.530056	0.00927963
RBM10	0.527682	0.0096596
PDE8A	0.526809	0.0098026
RASGRP2	0.523714	0.0103234
SRRM2	0.523007	0.0104454
HOXB4	0.522986	0.0104491
TACC1	0.522675	0.0105031
MORN1	0.5226	0.0105163
ZNF333	0.521866	0.010645
WDR78	0.521196	0.0107636
ZNF552	0.520053	0.0109686
SHROOM4	0.519656	0.0110405
SNORA46	0.519434	0.0110809
DMC1	0.518913	0.0111761
FZD5	0.518814	0.0111942
CHKA	0.518143	0.0113181
ISG20	0.518051	0.0113352
MEIS2	0.517661	0.0114077
RBM45	0.517406	0.0114554
LOC91450	0.517391	0.0114582
ZNF569	0.517214	0.0114914
ZBTB16	0.516799	0.0115695
ACTL6A	0.516323	0.0116597
ITGA6	0.516251	0.0116734
PNMT	0.515888	0.0117426
SUZ12P1	0.515314	0.0118526
DGKE	0.515144	0.0118854
TRA2A	0.513734	0.0121601
WDR83	0.513733	0.0121604
KIAA1033	0.512223	0.0124603
SNORA65	0.512219	0.012461
SNORA68	0.512194	0.012466
FBXO33	0.511595	0.0125866
MOB3C	0.5109	0.0127279
ZNF276	0.5098	0.012954
RAPGEF3	0.508936	0.013134
EXPH5	0.508771	0.0131686
FKBP1AP1	0.508653	0.0131934
PTK2	0.508407	0.0132452
CD3E	0.508172	0.0132949
TBC1D10A	0.507149	0.0135127
RPPH1	0.507023	0.0135397
GSDMD	0.506576	0.013636
GID8	0.505914	0.0137795
NISCH	0.505323	0.0139087
AAR2	0.505318	0.0139098
CTPS2	0.504632	0.0140612
VAV3	0.504517	0.0140865
P2RY10	0.503923	0.0142189
PTPN7	0.503366	0.0143438
TCN2	0.502781	0.0144759
TIFA	0.502745	0.014484
HEBP1	0.502682	0.0144984
SRSF6	0.502679	0.014499
SLC20A1	0.502252	0.0145963
HIST1H3E	0.501407	0.0147902
GFRA2	0.501162	0.0148468
ARHGAP44	0.50028	0.0150522
PABPC4	-0.500173	0.0150773
SNRNP35	-0.500522	0.0149956
NUCB1	-0.500925	0.0149019
MTX3	-0.501566	0.0147535
IFFO1	-0.501677	0.0147281
CEACAM19	-0.503094	0.0144052
SOS2	-0.50461	0.014066
MAP3K10	-0.505028	0.0139737
ARHGAP20	-0.505523	0.013865
ZSCAN5A	-0.506077	0.013744
PPP2R4	-0.50627	0.0137022
CXXC4	-0.506482	0.0136562
PDLIM5	-0.507306	0.013479
TTL	-0.507586	0.0134193
CXXC5	-0.50805	0.0133206
SEMA6C	-0.509185	0.013082
LIG4	-0.509329	0.0130518
UBTD1	-0.510379	0.0128345
UBR2	-0.51133	0.0126403
PHC1	-0.512763	0.0123521
SLN	-0.512864	0.0123322
NXPE3	-0.513283	0.012249
UBE4A	-0.513461	0.0122138
PSMA3	-0.513503	0.0122056
ATXN2	-0.513593	0.0121878
COPZ2	-0.513745	0.012158
NCAPD3	-0.514271	0.0120548
TULP4	-0.514456	0.0120188
UBE2L3	-0.516635	0.0116006
SOD2	-0.51703	0.011526
MYO18A	-0.51735	0.0114659
MTIF2	-0.518976	0.0111645
FAM22A	-0.519004	0.0111594
UBE2S	-0.519068	0.0111476
TMEM147	-0.519393	0.0110883
FLJ33630	-0.519828	0.0110093
TMEM184C	-0.51983	0.0110088
PPP1R12B	-0.520078	0.0109641
APC	-0.520334	0.0109178
FAM118B	-0.52065	0.0108611
SKP2	-0.521084	0.0107835
PPFIA1	-0.521406	0.0107263
LARS2	-0.521541	0.0107025
ZFP91	-0.521795	0.0106575
NSD1	-0.522236	0.0105799
MAP2K3	-0.522582	0.0105194
SLC25A15	-0.52263	0.010511
CC2D1A	-0.52273	0.0104936
MAPKAP1	-0.522842	0.0104741
HHATL	-0.523257	0.0104021
CLIP1	-0.523432	0.0103719
NUDT13	-0.524692	0.0101563
PCSK6	-0.526343	0.00987954
CAMTA2	-0.526541	0.0098467
GNL1	-0.527008	0.00976983
AAGAB	-0.527272	0.00972646
ERLIN1	-0.527489	0.00969109
TSPAN17	-0.528004	0.00960729
PMS2	-0.528361	0.0095496
RABGGTB	-0.52962	0.00934845
NAA50	-0.530182	0.00925978
USP5	-0.530252	0.00924886
MON1A	-0.532709	0.00886972
POPDC3	-0.53421	0.00864445
ATRAID	-0.534229	0.00864175
GATSL1	-0.534621	0.00858372
F8A1	-0.535284	0.00848627
LOC284379	-0.535482	0.00845738
ARHGEF11	-0.535908	0.00839541
SGCG	-0.536078	0.00837081
ZMYM2	-0.537022	0.00823534
LRSAM1	-0.538465	0.00803162
PLD5	-0.538603	0.00801232
STK40	-0.538903	0.00797064
IQCE	-0.539648	0.00786776
RAD51	-0.540141	0.0078003
SCLY	-0.541124	0.00766723
URM1	-0.541412	0.00762856
KY	-0.542042	0.00754468
ATMIN	-0.542541	0.00747877
CERS1	-0.54275	0.00745127
TRIM41	-0.543073	0.00740891
SLC46A3	-0.543792	0.00731555
HTATIP2	-0.544161	0.00726797
LRRFIP2	-0.544869	0.00717734
TCF23	-0.54527	0.00712653
COA4	-0.546108	0.0070211
BROX	-0.546503	0.00697192
DNAJB2	-0.547786	0.00681407
DCTN2	-0.549314	0.00662998
MCU	-0.549882	0.00656258
PSME4	-0.550007	0.00654787
EIF4G3	-0.553923	0.00609949
RFC5	-0.554127	0.00607683
MMADHC	-0.555094	0.00597051
FECH	-0.556573	0.0058109
MYOD1	-0.557156	0.00574887
RBM41	-0.557859	0.00567492
RIMKLA	-0.559923	0.0054623
NAPEPLD	-0.560191	0.00543522
ASPRV1	-0.560239	0.00543038
SIRT5	-0.560265	0.0054278
IPO13	-0.560842	0.00536983
M1	-0.561635	0.00529107
PCMT1	-0.561822	0.00527266
TNFAIP3	-0.562022	0.00525303
NFE2L1	-0.562475	0.00520873
MUSTN1	-0.562916	0.00516595
ZMAT3	-0.564698	0.00499589
MAP7D1	-0.564809	0.00498551
PLBD2	-0.565795	0.00489361
C6orf225	-0.566234	0.00485313
TMEM38B	-0.566892	0.00479302
STC2	-0.568006	0.00469271
SDK2	-0.56873	0.00462847
EEFSEC	-0.568872	0.00461591
ZNF273	-0.569103	0.00459557
ADAM9	-0.570192	0.00450089
PHF20	-0.570214	0.00449904
ABCB6	-0.570999	0.00443181
SGTB	-0.572065	0.00434186
SRD5A3	-0.57316	0.00425104
MAP4K4	-0.573569	0.00421755
CORO6	-0.578331	0.00384359
STOX2	-0.581453	0.00361384
TRAPPC3	-0.582489	0.0035402
TTF1	-0.582553	0.0035357
DPP3	-0.583965	0.00343746
LMO4	-0.585249	0.00335017
ZDHHC16	-0.585437	0.00333754
IRAK1	-0.585947	0.00330345
POMGNT1	-0.586011	0.00329922
ANKRD52	-0.588153	0.00315954
GPRC5C	-0.58903	0.0031038
TRIB3	-0.590397	0.00301858
UBR4	-0.590901	0.00298768
FHOD1	-0.594033	0.00280151
TRIM45	-0.596855	0.00264219
ZSWIM5	-0.597796	0.00259083
PSMD1	-0.599176	0.00251704
TIAL1	-0.601405	0.00240154
ACTR1A	-0.602877	0.00232777
LRP6	-0.603702	0.00228728
IREB2	-0.603771	0.00228394
TTYH2	-0.605165	0.00221695
POMT2	-0.606519	0.00215345
ATP8A1	-0.606697	0.00214525
SHISA4	-0.610049	0.0019952
TCAIM	-0.610125	0.00199189
RNASEL	-0.614372	0.00181491
ZNF680	-0.618261	0.00166475
EN1	-0.619018	0.00163682
BIRC2	-0.621473	0.00154884
ASUN	-0.622213	0.00152314
CACNG6	-0.625852	0.00140193
USP32	-0.627627	0.00134588
PAGE4	-0.62763	0.00134578
DST	-0.628079	0.00133189
HRC	-0.640571	0.00099182
MAP4	-0.640898	0.00098403
CCNT2	-0.640984	0.000981986
GCSAML	-0.641551	0.000968634
AAED1	-0.648914	0.000808693
DYNC1H1	-0.649108	0.000804807
ZFP106	-0.653588	0.000719402
GBE1	-0.654875	0.000696359
ATP11A	-0.660194	0.000607705
HERC2P4	-0.662319	0.000575119
ASB11	-0.665202	0.000533297
PRDM4	-0.677284	0.000385261
LOC284385	-0.694082	0.00023901
EGF	-0.694226	0.000238003
CACNB1	-0.74726	4.17938e-05
PRDM2	-0.765443	2.08354e-05

## Sheet: Table S6
Supplementary Table S6: List of adipose genes correlated with CWLG related to Figure 8
Gene	r-value	p-value
ERN1	0.66207	0.000578852
HAUS1	0.64364	0.000920711
ARSA	0.643368	0.000926835
HIST1H1D	0.587534	0.00319941
C4A	0.578869	0.00380315
POLR3C	0.569469	0.00456359
RPS4X	0.565662	0.00490593
APOE	0.564907	0.00497623
RNMT	0.562962	0.00516149
C12orf65	0.562631	0.00519355
TAF1D	0.562365	0.00521946
SCARB1	0.559526	0.00550275
NBEA	0.558753	0.00558198
RNF169	0.551105	0.00641943
NCOA3	0.545503	0.00709709
CMTM7	0.544315	0.00724814
POP1	0.542132	0.00753281
SPRED2	0.537708	0.00813795
HSCB	0.536977	0.0082417
LOC100130015	0.531438	0.00906426
UCKL1	0.523451	0.0103687
LAYN	0.523257	0.0104021
DOCK10	0.514878	0.0119369
UTP18	0.512738	0.0123571
FHOD3	0.511233	0.0126601
REC8	0.510893	0.0127292
PHF6	0.509049	0.0131103
SLC10A7	0.508972	0.0131264
NOP58	0.508627	0.013199
PRIM1	0.507448	0.0134486
WDR17	0.506183	0.013721
WDR76	0.505588	0.0138506
SLC27A2	0.501263	0.0148235
TYRO3P	0.50067	0.0149612
FKBP1B	-0.501696	0.0147238
PALLD	-0.50237	0.0145695
LOC643733	-0.502635	0.0145091
ID3	-0.50275	0.014483
PTPRU	-0.503891	0.0142259
ERMAP	-0.504235	0.0141492
RIPK1	-0.504321	0.0141302
C5orf4	-0.504522	0.0140856
SF3B4	-0.507805	0.0133727
TLCD2	-0.507877	0.0133574
CD200	-0.508684	0.0131868
LONRF2	-0.508932	0.0131348
KLHL11	-0.509699	0.0129751
SAYSD1	-0.512248	0.0124553
AFF3	-0.512757	0.0123534
TRIM8	-0.513516	0.0122029
ITGB1	-0.51521	0.0118727
AOC2	-0.516922	0.0115463
KDM8	-0.517345	0.0114669
TNS1	-0.517538	0.0114307
ARHGAP20	-0.517703	0.0113998
C2orf69	-0.518252	0.0112979
PTPRS	-0.523142	0.0104219
ITGAE	-0.524484	0.0101917
ZCCHC24	-0.524864	0.0101272
FBXL18	-0.525301	0.0100535
PDZD8	-0.525898	0.00995355
UEVLD	-0.526402	0.0098698
SOCS4	-0.527543	0.00968227
PTPN21	-0.527701	0.0096565
SCIN	-0.528259	0.00956608
TMEM185A	-0.531217	0.00909846
AGL	-0.531272	0.00908987
BTC	-0.531743	0.00901721
SLC35E1	-0.532859	0.00884705
TRIM16L	-0.53658	0.00829859
AMOTL2	-0.538375	0.00804426
TAF5	-0.538816	0.00798279
CLIP1	-0.53945	0.00789506
PARD3B	-0.546529	0.00696871
ZNF652	-0.547421	0.00685867
DNAH6	-0.548528	0.00672415
SPECC1L	-0.562001	0.00525511
LOC151009	-0.564393	0.00502466
RTFDC1	-0.564447	0.00501959
FAM171A1	-0.566522	0.00482678
NUAK1	-0.56911	0.00459496
MSRB3	-0.572698	0.00428918
ANO3	-0.57287	0.00427499
FBXO17	-0.581443	0.00361453
RNASEH1	-0.582909	0.00351068
ZMYND12	-0.587301	0.00321453
VPS18	-0.58804	0.00316682
DBX2	-0.599364	0.00250709
SCGN	-0.603854	0.00227989
ZNF706	-0.606848	0.00213829
IGIP	-0.611344	0.00193967
AKR7A2	-0.612221	0.00190279
VEGFC	-0.619958	0.00160265
MED7	-0.641394	0.000972306
LOC100506451	-0.646592	0.000856484
ZRANB3	-0.651177	0.000764352
RPP30	-0.682479	0.000333456
ADRB1	-0.717267	0.000117175

## Sheet: Table S7
Supplementary Table S7. IU muscle differentially expressed genes at 1.2 Fold change and p < 0.1 related to Figure 9
Gene	Fold change	p-value
COL1A1	-7.51215	3.43558e-08
HMGCS2	-6.19226	0.000951057
COL3A1	-5.62523	3.61477e-08
ASPN	-5.58056	1.20485e-07
DDN	-4.8521	0.000233875
TMEM8C	-4.83559	7.54105e-06
CHI3L1	-4.69979	1.22622e-06
LOC653513	-4.19282	3.55248e-05
MXRA5	-4.18474	3.43601e-06
SAA2	-3.88398	0.00461006
THY1	-3.88309	2.0749e-05
CPXM1	-3.82062	0.000209324
HP	-3.7958	0.00198699
SFRP4	-3.63234	1.69694e-05
SLC5A1	-3.59844	1.98093e-05
MMP9	-3.59786	0.000199253
TYRP1	-3.58625	0.000794767
NOV	-3.53419	8.49325e-05
COL1A2	-3.44679	1.20796e-06
ECEL1	-3.36007	0.000166181
KRT80	-3.24376	0.000724341
CCL19	-3.22344	0.00247633
COL5A1	-3.20341	7.35121e-08
SFRP2	-3.19058	0.00649769
SERPINE1	-3.13856	0.000752466
FZD10	-3.12969	6.63089e-06
GLT1D1	-3.06332	0.00181096
CRABP2	-3.0399	0.000214158
STMN2	-3.03197	0.00177571
CCL3	-3.00702	0.000621703
TPPP3	-2.9473	6.34755e-07
TMEM119	-2.89338	0.000644675
COMP	-2.88063	0.0579041
LUM	-2.80475	1.457e-06
FXYD4	-2.78167	0.00145533
SPON1	-2.77625	0.0134719
TNC	-2.74025	0.038596
ELN	-2.73673	0.000130639
FOSB	-2.7366	0.0700585
SLAMF8	-2.70406	0.000327108
CILP2	-2.67309	0.00293094
CCL13	-2.67032	0.00445368
CCDC80	-2.66514	1.12484e-05
OGN	-2.6569	5.98453e-05
MOXD1	-2.6564	0.0013461
CD69	-2.63864	0.000929399
ERBB3	-2.63416	0.00857446
LGI2	-2.63188	0.000226172
IGJ	-2.6256	0.0111542
CAMSAP3	-2.6181	0.00227072
CKB	-2.60938	0.00118317
COL5A2	-2.60802	3.20203e-05
MSMP	-2.60053	0.000123256
TTC39A	-2.60052	0.000226026
MGC39372	-2.55528	0.00922492
C2	-2.52368	0.000592501
CD163L1	-2.50379	0.00105553
ZNF556	-2.49052	0.00747178
CELSR1	-2.48219	0.00185754
BHLHE22	-2.47681	0.00363551
MYH3	-2.46561	0.00538949
CTHRC1	-2.4557	0.00113604
TUBB3	-2.45167	0.00213727
KAZALD1	-2.44888	2.31096e-05
IGLL5	-2.44586	0.0194523
ESM1	-2.43515	0.000919331
MYBPH	-2.42838	0.0417205
COL14A1	-2.41364	0.00185945
TNFAIP6	-2.40767	0.000237976
FAIM2	-2.40654	0.0031084
PHOSPHO1	-2.37695	0.000572634
VASH2	-2.37405	0.0018465
SMIM5	-2.37019	0.00234838
CH25H	-2.36147	0.00622056
GDF10	-2.35388	0.0014145
CERCAM	-2.34144	3.75962e-06
FNDC1	-2.33273	0.00455563
CD200R1	-2.3292	0.00139116
MLLT11	-2.32223	0.0627988
CYS1	-2.31594	0.00204802
SHANK1	-2.31327	0.000585568
MYL5	-2.31305	0.0145544
CRISPLD1	-2.31213	0.0102993
FAM180B	-2.30192	0.001391
CRMP1	-2.28769	0.0043044
PDE6G	-2.28449	0.00128956
LTK	-2.2831	0.00549902
GADD45G	-2.28117	0.0149807
ABLIM1	-2.27323	0.00131817
TNFRSF18	-2.26985	0.00916488
NLRP3	-2.25985	0.00598274
ARHGDIG	-2.25068	0.0391703
CASKIN1	-2.24744	0.00741624
IGSF10	-2.23027	0.0137251
SIGLEC9	-2.21861	0.00116972
THBS4	-2.2185	0.0220174
ADAMTS2	-2.21707	0.000459124
EMB	-2.20314	0.000973843
SAA1	-2.19916	0.0888536
RASD1	-2.19634	0.027367
MMP11	-2.19308	0.00285416
ETV4	-2.18829	0.0772336
LBP	-2.18613	0.0213384
ITGB8	-2.17434	0.0216728
LRRC17	-2.16254	0.00499944
FPR3	-2.16012	0.000797718
NGFR	-2.15809	0.00456964
PRG4	-2.15346	0.0198469
CCR2	-2.14566	0.00216203
IL6	-2.14204	0.0294036
INHBE	-2.14145	0.0074185
ABCC6	-2.13419	0.0078677
SLC45A3	-2.13159	0.00124261
OXCT2	-2.13018	0.00253695
FZD2	-2.12205	0.0215021
FAM57B	-2.12152	0.0309366
IL4I1	-2.11344	0.0184237
IL7R	-2.11061	0.00931737
CCL4	-2.10982	0.00704989
HSD11B2	-2.1042	0.00362513
RHOH	-2.10318	0.0021547
TNFAIP8L3	-2.10285	0.00923775
EDIL3	-2.10127	0.0743867
PMAIP1	-2.09047	0.00279996
LILRB4	-2.08817	0.00420887
PNMA2	-2.0876	0.00237173
PITPNM1	-2.08716	9.8497e-07
KDELR3	-2.08504	0.000574215
GPR183	-2.08077	0.00631719
DIO2	-2.07171	1.77558e-05
TMEM59L	-2.0695	0.00698357
CCL2	-2.06119	0.00937088
GNA15	-2.05758	0.00174893
SOX3	-2.05716	0.0245064
CILP	-2.05396	1.02941e-06
BRSK1	-2.05251	0.0130368
PRUNE2	-2.05107	0.0400962
QPCT	-2.0468	0.00722266
CYP4F11	-2.04564	0.0310563
IFITM10	-2.04364	0.011612
CERKL	-2.03723	0.0328707
ST6GALNAC2	-2.03397	7.82706e-05
FOXI2	-2.02698	0.0185337
BICD1	-2.02697	0.0178983
ASPHD2	-2.0265	0.0117726
ABO	-2.02005	0.00452203
SVOP	-2.01549	0.0276836
OSM	-2.01379	0.0275291
VCAN	-2.00727	0.00026615
OMD	-2.0007	0.00488405
SOCS3	-2.00006	0.0179538
TNFRSF9	-2	0.0207908
MYLK	-1.99981	0.0224616
PAPLN	-1.99929	0.00214202
VIPR2	-1.99917	0.00278405
ITGA11	-1.99674	3.79593e-05
CLEC2L	-1.9948	0.0194318
PI16	-1.99367	1.63333e-06
SCN5A	-1.99207	0.0948691
DPYSL3	-1.98947	7.98182e-06
ISLR	-1.98566	0.000172553
DKK3	-1.97942	0.000783862
USP32P1	-1.97853	0.0402702
EVI2A	-1.97786	0.00124342
PCDHB14	-1.97698	0.00500625
C11orf80	-1.9767	0.0010738
CLIC6	-1.96781	0.022154
SDK2	-1.96344	0.00470479
SLC4A7	-1.96204	0.000546099
HOXD1	-1.95948	0.0197331
C10orf55	-1.95945	0.02469
OLFML2B	-1.95928	0.000149317
BGN	-1.9563	0.00952484
CD28	-1.95596	0.00976007
DKFZp451B082	-1.95468	0.0137542
C10orf67	-1.952	0.0503675
EPHB3	-1.94752	0.0108013
FAP	-1.94751	3.2882e-05
TRPV3	-1.94589	0.0163876
DMBT1	-1.94273	0.0277841
SUCNR1	-1.93473	0.0332389
C8orf46	-1.93371	0.0240484
RGS11	-1.93335	0.00221889
DKK2	-1.92501	0.0187159
CYP7B1	-1.92392	0.000497799
MS4A6A	-1.91748	0.000242072
FONG	-1.91381	0.0475841
APCDD1L-AS1	-1.91361	0.00129223
CPT1C	-1.91198	0.00128578
SPP1	-1.90665	0.0868434
PTPRE	-1.90634	1.11983e-05
INPP5J	-1.90379	0.00312911
TMEM132B	-1.90362	0.0501188
RGS13	-1.90327	0.00878887
CYTIP	-1.90154	0.00514604
PTAFR	-1.90119	0.010967
NCF1B	-1.89763	0.00552488
NAV3	-1.89753	0.00871564
UNC5C	-1.89227	0.00653908
TLR7	-1.89221	0.0264244
CDH11	-1.88934	0.010093
LOC100288432	-1.88865	0.00322976
FLJ31485	-1.888	0.00777609
PPP1R1C	-1.88541	0.0350141
HIST1H3B	-1.88507	0.0178332
NEU4	-1.88421	0.0620586
CD2	-1.88312	0.00757183
LINC00152	-1.88061	0.0253908
KIAA1244	-1.88049	0.00617809
CAB39L	-1.88026	0.000186447
KRT23	-1.87846	0.0765639
NCS1	-1.87795	0.0370716
RASSF5	-1.87794	0.0133465
MAP6	-1.87663	0.00243959
TNNI3	-1.87502	0.00651931
HIST1H3G	-1.87276	0.0342466
SOHLH2	-1.86943	0.0123807
RGS1	-1.86827	0.0873697
UTS2R	-1.86591	0.0675407
LSAMP	-1.86582	0.0363863
BDKRB1	-1.86529	0.0930016
ADAMTS14	-1.86386	0.0507086
LAG3	-1.85737	0.0491248
TUBA1A	-1.85634	0.000380868
SERPINB12	-1.8562	0.0660943
ANLN	-1.85484	0.039298
COLEC12	-1.85462	0.000476235
AHR	-1.85435	0.000337666
CLEC11A	-1.85295	0.0122067
NES	-1.85089	0.004134
GPR68	-1.85086	0.0389722
HIST1H2AJ	-1.84939	0.040762
CNTN4	-1.84829	0.00572493
TIMD4	-1.84739	0.0328431
LEPREL2	-1.84712	0.00115439
MS4A7	-1.84072	0.0122818
CD44	-1.83987	0.02515
HMHA1	-1.8393	0.00391984
CD84	-1.83831	0.00719066
LOXL1	-1.83776	0.00352347
GRAMD3	-1.83369	0.000774775
RARRES3	-1.833	0.00277287
PILRA	-1.83205	0.00796116
ELANE	-1.83037	0.03573
BCO2	-1.83024	1.63374e-05
RAB31	-1.82917	0.000759134
FGF16	-1.82882	0.0127702
LOC285540	-1.82703	0.0191398
CNTN1	-1.82668	0.00771114
TBX5	-1.82666	0.0427419
FGL2	-1.82657	0.00229829
LOC100505876	-1.82599	0.00347288
CLEC9A	-1.82592	0.0342511
PTGFRN	-1.82569	0.000319019
FAT3	-1.8255	0.0288798
RANBP3L	-1.82285	0.029133
RBP1	-1.82199	0.00167796
GLIPR2	-1.82177	0.000170641
MPO	-1.82108	0.00816886
KIAA1755	-1.81866	0.0224157
PLEK	-1.8177	0.00332201
FAM20A	-1.81683	0.00794493
ZC3H12D	-1.81648	0.0401579
ADCY7	-1.81359	3.5163e-05
MRC2	-1.81223	0.000402432
MPEG1	-1.8096	0.00189284
FAM102B	-1.80839	0.000242457
ITGA4	-1.80808	0.0179039
HIST1H3I	-1.8071	0.00274466
LGALS2	-1.80526	0.0128428
RTP2	-1.80407	0.0589886
MFAP2	-1.80404	0.0198425
FN1	-1.80282	0.0397064
OLFM2	-1.79994	0.0247674
TACSTD2	-1.79805	0.0425593
SLC4A11	-1.79752	0.00811444
PTHLH	-1.79649	0.0401896
ANKRD18A	-1.79646	0.0580195
LOC100506385	-1.79527	0.0281078
DDAH1	-1.79468	3.70628e-05
PRSS35	-1.79411	0.0457209
TNFAIP8	-1.79215	0.013466
MS4A14	-1.79068	0.0412962
ZBTB47	-1.7879	0.0149767
MYOZ2	-1.78757	0.0381507
GNAS	-1.7863	0.0199461
THBS3	-1.78536	0.000479064
IKZF3	-1.7848	0.0515028
FNDC5	-1.78464	0.00113524
RGS2	-1.7845	0.00700099
CD209	-1.78435	0.0207328
PRND	-1.78392	0.0919236
CD33	-1.78362	0.0131511
RECK	-1.78339	6.30988e-05
TFRC	-1.7833	0.00441254
OAF	-1.78229	0.000364196
TLR8	-1.78183	0.0412009
TMEM161B-AS1	-1.77966	0.00482193
ECM1	-1.77932	0.00110086
SNCB	-1.77831	0.0322543
ALDH1A3	-1.775	0.000330688
PTPLAD2	-1.77472	0.00367681
FCGR1A	-1.77415	0.0586455
LOC100506585	-1.77328	0.0543518
SCN4B	-1.77244	0.00126423
TMEM176B	-1.7719	0.000810836
LOX	-1.77142	0.0202031
SEMA3D	-1.77054	0.0485316
LOXL2	-1.76932	0.00380013
WNK3	-1.76922	0.0282661
GAS2L2	-1.76842	0.0741607
PBX4	-1.7676	0.0671498
BCL11A	-1.76722	0.0176349
GPX8	-1.76435	0.000542984
GINS3	-1.76371	0.00776237
VSTM2L	-1.76362	0.0488815
C1QB	-1.76257	0.0145576
XRCC4	-1.76146	0.00814441
LOC645752	-1.76024	0.0792713
RASSF2	-1.7585	0.00546975
HK2	-1.75771	0.038029
TNFAIP8L2	-1.75648	0.00314627
HIST1H2AM	-1.75579	0.0147517
PRSS12	-1.75435	0.0230311
SPINT1	-1.75154	0.0453772
ACOT11	-1.75138	0.0132449
DHRS9	-1.74766	0.0630682
PDZD2	-1.74703	0.00619444
DSCR8	-1.74603	0.0224818
NIPSNAP1	-1.74428	4.56778e-05
KCNJ5	-1.74247	0.0185616
ADAMTS16	-1.74222	0.028826
CIT	-1.74186	0.0097503
WDR62	-1.73793	0.00892471
ADA	-1.73731	3.43651e-06
C1orf233	-1.73621	0.0500073
CCR7	-1.73607	0.0704198
MID1	-1.73525	0.0669491
AIG1	-1.73373	5.40373e-05
FAR2	-1.73323	0.00735617
GLI1	-1.73219	0.0730827
P2RY10	-1.73161	0.0641477
SCRG1	-1.73074	0.0352862
TIMP1	-1.7295	0.00117387
BIRC5	-1.7295	0.072087
IGSF3	-1.72934	8.35916e-05
CYTH4	-1.7293	0.00585375
TK1	-1.72766	0.0407107
C16orf89	-1.72741	0.0118833
SSC5D	-1.72731	0.00461292
CSRNP3	-1.7269	0.026764
ZNF883	-1.72661	0.0148105
GRIN2D	-1.72563	0.0462906
HIST3H2BB	-1.72377	0.00356317
PLCB2	-1.72352	0.0034502
LILRA2	-1.71995	0.0150097
FBLN7	-1.71972	0.00918952
ZBTB7C	-1.71919	0.00951078
GPR98	-1.71872	0.0915322
GPR162	-1.71864	0.0477588
PCDHGA5	-1.71851	0.0149759
HR	-1.71693	0.0041755
LMX1B	-1.71485	0.0814782
MYH6	-1.71392	0.0553525
CXCL3	-1.71318	0.0533537
CCDC88B	-1.71295	0.0418903
OCA2	-1.7107	0.0293516
TRAM1L1	-1.7095	0.00860889
ENPP6	-1.70908	0.0581307
PCOLCE	-1.70322	0.0053838
PCSK6	-1.7013	0.000218566
FBLIM1	-1.70025	0.032467
F13A1	-1.69824	0.0145843
CASS4	-1.69706	0.0180022
PDE10A	-1.69423	0.00406096
TMEM63C	-1.69296	0.0383047
TREM1	-1.69186	0.0839572
PDGFD	-1.69082	0.00174103
IL18	-1.69072	0.00721497
C1QTNF6	-1.69044	0.00520184
CAPN6	-1.68975	0.0263426
SLC37A2	-1.68807	0.0296052
ARNTL2	-1.68593	0.0319648
2018-09-01	-1.68588	0.042441
COL6A2	-1.68391	0.000456843
MARCO	-1.68343	0.0976317
CD248	-1.68118	0.00639769
MSC	-1.67922	0.00639225
AKR1C3	-1.67721	0.00868468
KIAA0226L	-1.67703	0.0404836
CLEC12A	-1.67633	0.0721358
RYR3	-1.67506	0.0664719
SH2D2A	-1.67449	0.0723555
DPT	-1.67429	0.000401743
C1R	-1.67409	0.000959894
PIK3R5	-1.67381	0.0233045
TMED3	-1.67353	0.00292631
IRF5	-1.67301	0.0191654
FABP3	-1.673	0.00768348
C3AR1	-1.67294	0.0118035
KCNA6	-1.67217	0.0233807
MAN1B1	-1.67206	0.027432
ZNF467	-1.67028	0.00408903
EPS8L2	-1.67026	0.0579582
SCN9A	-1.66963	0.0339483
VSIG4	-1.66736	0.0164468
FMO1	-1.66682	0.0878336
DNAJA4	-1.66605	0.00460256
CLEC10A	-1.66595	0.0120481
KIAA1549	-1.66324	0.0249444
PRDM1	-1.66059	0.00743118
CSF1R	-1.66033	0.00248283
CDA	-1.65948	0.0233151
SLC22A4	-1.65918	0.0207714
EN2	-1.65864	0.0654582
LYVE1	-1.65843	0.00457485
KANSL1-AS1	-1.65823	0.0212792
SPARC	-1.65763	0.0016056
PLTP	-1.65725	0.00707855
RTKN	-1.65713	0.000279001
OSR1	-1.65482	0.0146145
IL7	-1.65465	0.0415039
EPHA3	-1.65423	0.01408
COL8A1	-1.65421	0.000408256
PCDH17	-1.65347	0.00299485
DBNDD1	-1.65154	0.0480091
TTC9	-1.6515	0.00598784
REC8	-1.65111	0.0339743
INHBA	-1.65033	0.0650775
L1CAM	-1.64995	0.0177358
HIST1H2AL	-1.64972	0.0594202
NTN1	-1.64932	0.00706502
IPCEF1	-1.64668	0.0500987
CECR1	-1.64586	0.0656429
NLGN3	-1.64556	0.0425816
F10	-1.64532	0.00571089
CPXM2	-1.64526	0.00906102
AKR1C2	-1.64483	0.0213741
RFX2	-1.64336	0.0427403
PLEKHA4	-1.64336	0.00199131
OLFML1	-1.64224	0.000633366
DENND1C	-1.64109	0.0550594
MVP	-1.64098	2.93484e-05
TYROBP	-1.63997	0.00240089
MED12L	-1.6397	0.0717525
SNX20	-1.63836	0.0587118
SPON2	-1.63787	0.00461653
CEACAM19	-1.63783	0.00127767
BLID	-1.63708	0.0162792
IGSF6	-1.63687	0.0393943
CCDC102B	-1.63613	0.0558054
C15orf37	-1.6358	0.0380289
GAS7	-1.63459	0.000334719
GALNT14	-1.63432	0.0929752
PRSS45	-1.63258	0.0820505
RNF207	-1.63226	0.0042232
C10orf62	-1.63178	0.0771122
GPRC5A	-1.63073	0.0353337
PURG	-1.62927	0.010743
DOK3	-1.62906	0.0176199
CD4	-1.62897	0.00789413
HSPA6	-1.62887	0.0420509
ICMT	-1.62853	0.000221094
FAT1	-1.62829	0.0199065
ADAMTS10	-1.62807	0.0024112
ZNF625	-1.62795	0.0306737
FKBP10	-1.62729	0.00110156
FOXF2	-1.62699	0.0541278
KIAA1549L	-1.62665	0.0663899
PIN4	-1.62623	0.0255906
PENK	-1.62618	0.0626386
PCDHGC3	-1.62477	0.0050022
ANGPTL2	-1.62396	0.00138799
C1QA	-1.62391	0.0150057
IL17B	-1.62375	0.0686182
PAX1	-1.62298	0.0714377
NCF1C	-1.62287	0.0414114
PAK3	-1.62275	0.0630012
PTGIR	-1.62228	0.0390724
GATS	-1.62224	0.024265
LOC283070	-1.62223	0.00505507
CD276	-1.62055	0.0103217
AMPD2	-1.6195	0.00766823
POU5F1P3	-1.61935	0.0351366
FSTL1	-1.61932	0.00363389
ACP5	-1.61813	0.0614675
CAMK1D	-1.6178	0.0168512
TRAF4	-1.61767	0.00615004
CRIP1	-1.61571	0.0129364
CD83	-1.61568	0.0317652
BDH1	-1.61504	0.0599929
SMPDL3A	-1.61502	0.0118797
ADAMTS7	-1.615	0.0144997
ARSJ	-1.61496	0.0377247
SHC2	-1.61452	0.0213813
HMCN1	-1.61446	0.00793039
CECR7	-1.61301	0.0675951
RTN2	-1.61275	0.0448915
SIGLEC1	-1.61211	0.0543699
LPPR4	-1.61152	0.0379451
CDON	-1.61095	0.00696102
UAP1L1	-1.61085	0.00676307
VAV1	-1.61032	0.0286831
C1S	-1.61019	0.00044166
NPTX2	-1.61015	0.0576019
RUNX2	-1.60834	0.0488698
PDE4C	-1.60805	0.0238697
P2RY14	-1.60683	0.0029317
MSR1	-1.60682	0.0437447
ATP8B4	-1.60621	0.0236029
CHRD	-1.60467	0.000240015
FCER1G	-1.60408	0.00798532
SMOC2	-1.60279	1.29436e-05
FAM176A	-1.60222	0.0436805
HSPA7	-1.60161	0.0154544
IKBIP	-1.60084	0.0126048
SEMA5A	-1.60058	0.00120089
LOC100506874	-1.59462	0.0518662
C1QTNF2	-1.5945	0.0149722
MIR548I1	-1.59438	0.00443528
KLRK1	-1.59409	0.0716384
TMEM98	-1.59404	0.00227614
C2orf81	-1.59299	0.0795262
TCTEX1D4	-1.5927	0.0311193
SLC41A2	-1.59099	0.018361
MARVELD1	-1.58963	0.0125787
COL6A6	-1.58875	0.0996295
SQLE	-1.58832	0.0662786
HHIPL1	-1.58752	0.0142055
RTN3	-1.58654	0.00590128
HOXD9	-1.58643	0.0466281
NAT14	-1.58637	0.00270451
ENPP1	-1.58601	0.00111356
TP53I3	-1.58549	0.042301
GLT25D2	-1.58516	0.0142969
CDYL2	-1.5836	0.0113338
LY86	-1.58074	0.0879014
DOCK10	-1.57898	0.042725
TRPV2	-1.57758	0.00677589
AHNAK2	-1.57561	0.00856901
S100A3	-1.57504	0.0968589
TSPAN1	-1.57468	0.0476975
GPR27	-1.57426	0.0219567
CD5	-1.57408	0.0657644
FLJ36000	-1.57393	0.0442306
MFI2	-1.57379	0.0301573
PRRG3	-1.57376	0.0108865
MAGED4B	-1.57267	0.0674053
HAAO	-1.57236	0.015127
SLC22A15	-1.57228	0.0389102
HEPH	-1.57024	0.0957463
VIMP	-1.56869	0.00746255
CHRND	-1.56761	0.0876938
POLR2K	-1.56716	0.0307571
KCNAB2	-1.56684	0.0025778
IL10RA	-1.56617	0.0397395
PPP1R26	-1.56608	0.00173892
IFI6	-1.56605	0.00126096
STMN3	-1.56604	0.0211871
EML6	-1.56578	0.0285064
TAGAP	-1.56374	0.0596503
ISG15	-1.56339	0.00646592
C1QC	-1.5633	0.0440604
NT5E	-1.56292	0.0303868
PLXDC1	-1.56232	0.00250486
RAB42	-1.56221	0.0246264
SNCAIP	-1.5622	0.0561774
PTPRD	-1.56005	0.0435957
P2RY13	-1.55908	0.0354998
CD14	-1.55886	0.010224
NCKAP1L	-1.55868	0.0352325
ACSS1	-1.55839	0.0152522
GDF11	-1.55797	0.0261966
LSP1	-1.55744	0.000766042
EVL	-1.55697	0.0595136
VSIG10L	-1.55675	0.0778183
AGTPBP1	-1.55666	0.000813384
SLC5A4	-1.55413	0.0926716
TRIM66	-1.55368	0.000902396
CCDC89	-1.55349	0.0251872
RPS6KA1	-1.5533	0.0259065
ALOX5AP	-1.55317	0.00619837
GPNMB	-1.55275	0.0125188
HEATR8	-1.55263	0.0680771
ZNF668	-1.55051	0.0614358
FBLN1	-1.54954	0.0181555
C5orf63	-1.54871	0.0508741
RSPO3	-1.54823	0.0403603
PAQR9	-1.54819	0.0969713
EMILIN2	-1.54674	0.0218825
GLT8D2	-1.54633	0.00387081
PAG1	-1.54459	0.00388128
CR1	-1.54436	0.0732891
CRHBP	-1.54396	0.0800478
TRPM2	-1.54331	0.0280476
RCN3	-1.5425	0.00149894
CGNL1	-1.54233	0.08241
NID2	-1.54122	0.0167071
TECRL	-1.54053	0.09742
NINJ2	-1.54014	0.0461607
TNFSF13B	-1.53997	0.0953932
DOCK2	-1.53964	0.0321451
FSTL3	-1.53813	0.0114951
STXBP2	-1.53799	0.0247318
PCDHB15	-1.53786	0.0048787
ITGAX	-1.53706	0.0758834
FADS2	-1.53538	0.0143383
DCN	-1.53523	0.00207395
TMEM54	-1.534	0.00302346
MFAP4	-1.53394	0.00742745
AIF1	-1.53393	0.01321
TARBP2	-1.53362	0.0579604
PTK7	-1.53299	0.0382362
LILRB5	-1.53171	0.0213999
BCHE	-1.53166	0.00816308
MAMDC2	-1.53126	0.00866072
NMI	-1.53107	0.0164464
SHC3	-1.53079	0.032978
GSG2	-1.52995	0.0408729
S100A6	-1.52965	0.0457202
WDR17	-1.52871	0.0687385
HAVCR1P1	-1.52825	0.0477224
MAPK10	-1.52744	0.0391293
ISLR2	-1.52659	0.041671
SLC16A2	-1.52489	0.00319467
GPSM2	-1.52418	0.00888396
CPA3	-1.52298	0.0161582
MYADM	-1.52289	0.01294
CCDC24	-1.52288	0.0539777
CLEC4E	-1.52266	0.0939878
MST1R	-1.52227	0.0406682
TBXA2R	-1.52197	0.00587762
LAPTM5	-1.52106	0.0279757
GGTLC2	-1.5208	0.0778029
RCOR2	-1.52023	0.00417501
NAGPA-AS1	-1.51998	0.0575505
PRTFDC1	-1.51839	0.0196509
NPTXR	-1.51813	0.0341128
C3orf52	-1.51732	0.0844713
SAMD14	-1.51682	0.0161672
VASP	-1.51675	0.019303
FGF6	-1.51657	0.081238
BCDIN3D-AS1	-1.51561	0.00231317
ANPEP	-1.51462	0.0585177
VENTX	-1.51453	0.0917029
SLC9A1	-1.51412	0.00246372
REM1	-1.51288	0.00744344
C1QTNF3	-1.51246	0.0070566
RBP5	-1.51209	0.0915494
GNG7	-1.51168	0.0596835
NCF2	-1.50952	0.0227071
FLRT2	-1.50891	0.0871598
TGFB2	-1.50791	0.00639884
ACOX2	-1.50731	0.025486
HGF	-1.50631	0.0417838
CD163	-1.50611	0.0531439
SCN3B	-1.50554	0.051722
GLTPD1	-1.50542	0.00525498
MEDAG	-1.50373	0.00559232
KDELC1	-1.50322	0.0412365
PDZD4	-1.50257	0.0738331
KCND2	-1.50219	0.0374738
THBS2	-1.5018	0.0437664
PCGF2	-1.50162	0.0176274
LOXL3	-1.50069	0.0235816
ZNF385B	-1.49997	0.0224825
MYOF	-1.49891	0.0286603
CDC42EP5	-1.49854	0.028556
LCP1	-1.49825	0.0536815
C4orf33	-1.49792	0.0448104
CPQ	-1.49663	1.2039e-05
COL18A1	-1.49654	0.0127962
ETV1	-1.4963	0.0155817
SLC25A15	-1.49569	0.0390956
CCDC3	-1.49532	0.0773119
RAD54B	-1.49482	0.00766266
IRX6	-1.49481	0.0874966
GABBR1	-1.49426	0.0910962
BLOC1S2	-1.49399	0.00258528
NDRG4	-1.49378	0.0167848
LOC100499405	-1.49297	0.0986862
ARL4A	-1.49185	0.0501619
PDGFRL	-1.49169	0.00787715
DANCR	-1.49116	0.00250297
ME2	-1.49111	0.00740402
NCF4	-1.49075	0.044162
MFHAS1	-1.49032	0.0123511
MGC72080	-1.48989	0.00455939
FBN1	-1.48918	0.0146781
MRC1	-1.48898	0.016639
CHD3	-1.48756	0.00248217
EDN1	-1.4874	0.0800307
COL6A1	-1.4851	0.00904951
ST3GAL4	-1.48387	0.0108387
MMP16	-1.48337	0.0502322
MAP4K1	-1.48336	0.054296
NTF3	-1.4823	0.0792676
ARHGEF25	-1.48204	0.08801
RNF112	-1.48183	0.0521459
DNM1	-1.48168	0.0333069
E2F3	-1.48165	0.0172057
SPI1	-1.48147	0.0339854
HAS2	-1.48144	0.0296968
HTR2A	-1.48124	0.0742201
CERS4	-1.48047	0.0800135
PDLIM4	-1.47998	0.020603
LOC100130872	-1.47945	0.0693621
TYMP	-1.47902	0.0467712
HIST1H4F	-1.4787	0.0474553
LIF	-1.47865	0.0917887
NCKAP5L	-1.47853	0.000813369
DPEP2	-1.47835	0.0600958
QPRT	-1.47803	0.0644624
ATP2A3	-1.4777	0.0546896
HUNK	-1.47699	0.0697495
GOLM1	-1.4765	0.00697473
PREX1	-1.47413	0.00450876
MAP4K4	-1.47367	0.000514917
SOX12	-1.47359	0.0456568
FREM1	-1.47349	0.0453695
EMID1	-1.47313	0.0596592
B4GALNT3	-1.4714	0.0824385
IFFO2	-1.47119	0.027879
VAV2	-1.4711	0.00618977
ARHGAP9	-1.47089	0.0942631
OSGIN2	-1.47045	0.000753778
SNORA36C	-1.4702	0.0459811
ACTRT3	-1.46992	0.0744328
GNB4	-1.46831	0.00876608
ACR	-1.46762	0.0685934
PCDHB19P	-1.46752	0.0658057
MRO	-1.46751	0.0830144
PEAR1	-1.46725	0.0762385
RNF24	-1.46712	0.086585
ABCB8	-1.46682	0.00633331
PLIN5	-1.46538	0.0714601
GXYLT2	-1.46484	0.0845755
ANTXR1	-1.46445	0.00770423
RERG	-1.46364	0.0230054
ATP9A	-1.46356	0.0281232
BTN3A2	-1.46277	0.0520184
KRT10	-1.46275	0.0769859
CXCR4	-1.46251	0.0172338
RELL1	-1.46223	0.0464948
SHF	-1.46188	0.0462069
BMPER	-1.46181	0.0312458
TES	-1.46151	0.0218242
GNB5	-1.46077	0.0216561
MAPRE3	-1.45925	0.00378479
EHD3	-1.45906	0.0679631
APOPT1	-1.45819	0.0336899
SPINT2	-1.45754	0.0673819
GLIS2	-1.45709	0.0127488
EML2	-1.45663	0.0232209
C16orf54	-1.45663	0.0790644
C15orf59	-1.45591	0.0433602
FSCN1	-1.4554	0.0209196
KALRN	-1.45519	0.0475639
DAB2	-1.45503	0.0213651
WBP5	-1.45408	0.000736841
SPATA20	-1.45385	0.0316302
CYP39A1	-1.4531	0.0656024
ARRDC3	-1.45292	0.00380006
CCDC144A	-1.45175	0.0275948
FAM177A1	-1.45142	0.0146578
PCDHGB5	-1.4496	0.00865765
SLCO5A1	-1.44938	0.00300427
PDK3	-1.44935	0.0646665
TSHZ3	-1.44921	0.0316276
MYH10	-1.44915	0.0333461
MASP1	-1.44909	0.0933493
LPAR1	-1.44851	0.0249882
MAST3	-1.44823	0.0232423
RRBP1	-1.44819	0.000268077
C1orf229	-1.44711	0.0670802
SDSL	-1.44705	0.0959153
CCDC176	-1.44684	0.0399279
A2M-AS1	-1.4465	0.0192106
FAM180A	-1.44586	0.0881561
REP15	-1.44581	0.0417962
JAK2	-1.44424	0.00795908
TMEM136	-1.44394	0.0240993
MMP14	-1.44369	0.0567489
TGFB1	-1.44368	0.0106244
CFL2	-1.443	0.00231712
LRRC37A	-1.44294	0.0542647
SYK	-1.44284	0.0579387
CC2D2A	-1.44158	0.00174882
TNXB	-1.43979	0.00994441
DECR1	-1.43954	0.00799065
EMP3	-1.43864	0.0252421
KLHDC8B	-1.43832	0.0124389
SPIRE1	-1.43777	0.00610898
NCAPG	-1.43656	0.0933948
DGKA	-1.43615	0.0867158
CETN4P	-1.43603	0.0963127
TENM1	-1.43601	0.0366975
PLAUR	-1.43597	0.034476
DOK2	-1.43521	0.0597126
DUSP19	-1.43516	0.0228627
DBN1	-1.43427	0.00749348
DYNC1I1	-1.43404	0.0801235
HOXD-AS2	-1.43364	0.095811
MX2	-1.4336	0.0672501
KCTD17	-1.43317	0.0376589
FAM92A1	-1.43232	0.00753758
CMTM6	-1.43155	0.00494655
CALD1	-1.43121	0.0496086
COL16A1	-1.43116	0.0504981
TP53INP2	-1.43097	0.026705
C3orf70	-1.43046	0.0597112
ADAP2	-1.42979	0.0602132
ZNF486	-1.42957	0.026045
AKAP6	-1.4295	0.000495482
HTRA1	-1.42902	0.0100328
LGMN	-1.42786	0.00139828
PLXNC1	-1.42741	0.00269819
MMP2	-1.427	0.0301547
TTLL3	-1.42699	0.0682354
ANKRD13D	-1.42689	0.0222561
CTSK	-1.42683	0.0594915
MAP3K10	-1.4249	0.00167386
CES2	-1.4236	8.49075e-05
PDGFRB	-1.42206	0.00832815
IL17RD	-1.42199	0.0790612
BTN3A1	-1.4218	0.0525953
PGRMC2	-1.42171	0.00367275
RIPK3	-1.42148	0.0967672
GGT5	-1.42136	0.0287424
KIAA0930	-1.42075	0.0139357
TOMM40L	-1.42038	0.00564433
ZNF385D	-1.42012	0.00616043
UCP3	-1.41897	0.0717817
SLC35B3	-1.41794	0.0106736
CAMKK1	-1.41774	0.0861189
ORAI2	-1.41754	0.0391161
FAM105A	-1.41727	0.0366247
DCLK1	-1.41707	0.0867272
HOXD8	-1.41692	0.00130751
CCDC159	-1.41681	0.0110602
COCH	-1.41678	0.095158
CATSPER2P1	-1.4163	0.0152097
CCDC109B	-1.41624	0.0635304
CFB	-1.41471	0.0739625
LYPLA1	-1.41469	4.59798e-05
GALNTL1	-1.41458	0.0487918
TRIL	-1.41424	0.0435394
GSTZ1	-1.41377	0.000935204
OAS1	-1.41328	0.0508521
RAB11FIP3	-1.41325	0.000209659
ZC3HAV1L	-1.41299	0.0115318
CBR1	-1.4129	0.00129169
MDK	-1.4125	0.0496132
RAB40B	-1.41197	0.00765482
PCDHB13	-1.41175	0.0316116
MAP7D3	-1.41173	0.00285447
CFP	-1.41048	0.083449
PARP3	-1.41003	0.000799333
GSR	-1.40993	0.00721787
STAB1	-1.40985	0.0593421
SCD5	-1.40918	0.0367306
CD9	-1.40867	0.0222029
ARHGAP21	-1.40849	0.000531669
EBF2	-1.40842	0.00642251
TANC2	-1.40825	0.0050473
ANKRD24	-1.40676	0.0654006
PPIP5K2	-1.40633	0.0097094
MIR497HG	-1.40621	0.0776244
LARP1B	-1.40576	0.000265709
MB	-1.40477	0.00344804
PHTF2	-1.40461	0.01015
NLRC3	-1.40456	0.0729424
FAM171B	-1.40429	0.0289708
FOLR2	-1.40423	0.0633682
SCARF2	-1.40372	0.0844742
HSD11B1L	-1.4033	0.0367799
LGALS3BP	-1.40286	0.0238746
JAZF1	-1.40222	0.00426482
LEPREL4	-1.40191	0.00743161
HYAL1	-1.40107	0.0214478
PLEC	-1.4009	0.0965055
FP588	-1.40066	0.0643123
SLC29A3	-1.40058	0.0519303
IL16	-1.39973	0.0229049
LINC00623	-1.39945	0.0727638
BCAT1	-1.39922	0.0744762
HIST1H3A	-1.39861	0.0314681
NPDC1	-1.39829	4.09299e-05
CARNS1	-1.39811	0.0839149
TAS1R3	-1.39755	0.0322986
MTHFD1L	-1.39728	0.0898329
GMIP	-1.3971	0.0580768
COL5A3	-1.39709	0.0744697
PDGFRA	-1.3967	0.000744366
FHDC1	-1.39618	0.0812164
C10orf131	-1.3959	0.0366546
LMBRD2	-1.39507	0.00213587
LRRN1	-1.39297	0.0298606
DKFZp779M0652	-1.39237	0.0953833
RFXAP	-1.39182	0.035407
STK36	-1.39178	0.0258217
WNT5A	-1.39151	0.00349764
OGFRL1	-1.39079	0.00427237
FAM171A1	-1.3906	0.0391377
ARHGAP15	-1.39038	0.0508226
LRRC25	-1.39022	0.018959
C8orf37	-1.38876	0.0621516
LOC285419	-1.38862	0.0900857
P2RX4	-1.38851	0.0269677
DYSF	-1.38847	0.00481621
SH2D3C	-1.38798	0.0803452
THPO	-1.38756	0.0687402
MAP3K12	-1.38687	0.0162849
HCFC1R1	-1.38686	0.0310999
ALAS1	-1.3863	0.0140456
POMT2	-1.38595	0.00650758
SF3B4	-1.38593	0.0361187
PIK3CG	-1.38582	0.0343908
LOC100506668	-1.38539	0.0150674
SEMA3C	-1.385	0.0130948
LHFPL2	-1.38472	0.0472613
UCP2	-1.38448	0.0123019
ISCA1	-1.38422	0.0123893
ZFP106	-1.38407	0.000884768
KCNQ1	-1.38365	0.093445
CTTN	-1.38295	0.000211831
INMT	-1.38286	0.00584586
ITGAV	-1.38284	0.000493987
FAM47E	-1.38221	0.0436271
XYLB	-1.38214	0.0780243
FZD9	-1.38173	0.0823373
BICC1	-1.38163	0.0110927
M1	-1.38139	0.0363854
TM2D3	-1.38113	0.0497405
LRRC4	-1.38076	0.0867149
PARP9	-1.3807	0.0514678
COPZ2	-1.38049	0.000413197
IL4R	-1.38029	0.0605586
GPRC5C	-1.37993	0.0117446
NUDT8	-1.37933	0.0560265
CALHM2	-1.3792	0.0659305
GCSH	-1.3776	0.00106643
ANKRD6	-1.37757	0.015397
TTYH3	-1.37742	0.0120936
HPCAL1	-1.37729	0.00241266
WIPF1	-1.37715	0.0210781
SH3PXD2B	-1.37632	0.0883095
ETFDH	-1.37509	0.00605999
KATNAL1	-1.37471	0.000495836
LOC100505687	-1.3747	0.0344358
AP3M2	-1.37421	0.00336458
SFXN3	-1.37347	0.02506
CCND2	-1.37324	0.0611418
NFATC4	-1.37211	0.062294
HCG26	-1.37142	0.0680399
RECQL4	-1.37119	0.0272298
RP9P	-1.37084	0.0416002
SOGA1	-1.37048	0.00265661
PPM1M	-1.37019	0.00821502
FAM43A	-1.36957	0.021748
KDELC2	-1.36927	0.0204621
TCFL5	-1.36899	0.0588901
CNTNAP1	-1.36801	0.0306108
LTBP2	-1.36748	0.0783541
FAM149A	-1.36729	0.076714
OSBPL10	-1.36725	0.0162342
A4GALT	-1.36705	0.01013
NUDT19	-1.36682	0.0197549
BOC	-1.36639	0.0382981
TFDP2	-1.36633	0.000272867
ZNF720	-1.36592	0.02921
LNP1	-1.36587	0.0260926
CYB5R1	-1.36553	0.00755043
NTN4	-1.36553	0.0132985
CCDC141	-1.36504	0.0808415
DNAJC2	-1.36475	0.0150272
DKFZP686I15217	-1.36474	0.0560947
KRBA2	-1.36467	0.010324
PCDH7	-1.3646	0.0917478
SULF1	-1.36411	0.0975813
IL13RA1	-1.36404	0.00880701
NPY6R	-1.36401	0.0775984
PPIB	-1.36398	0.00609767
LDLRAD4	-1.36393	0.00111588
TGFBI	-1.36286	0.0651643
SNX14	-1.36251	0.000824504
RIPK2	-1.362	0.0380575
SHISA4	-1.36193	0.0919491
IFIH1	-1.36173	0.0587323
APLNR	-1.36068	0.0769743
TET1	-1.36052	0.0726814
SVEP1	-1.36039	0.0846644
SLC9A9	-1.36034	0.0216131
CD58	-1.3598	0.0163041
ACVR1	-1.35909	0.00230479
C11orf52	-1.359	0.0621609
GRN	-1.35835	0.000121378
SLC43A3	-1.35778	0.0176285
ZDHHC1	-1.35749	0.00700407
MTFP1	-1.35687	0.0943307
ITGB5	-1.35625	0.0118557
ADAM33	-1.35545	0.0149519
HOMER1	-1.35508	0.0177407
DNALI1	-1.35508	0.0224397
CAMSAP2	-1.3548	0.0261629
DUSP6	-1.35462	0.0408028
DFNA5	-1.35423	0.0770515
LHFP	-1.354	0.0363378
S100A10	-1.35351	0.080782
CNPY4	-1.35336	0.0328927
FBLN2	-1.35276	0.00473669
GNG2	-1.35167	0.0370321
PIGP	-1.3515	0.00451218
PDE1A	-1.34925	0.0712521
CYP2J2	-1.34913	0.0689562
SH3BP4	-1.34906	0.0336931
SERPINB1	-1.34794	0.0386163
LOC100507217	-1.34784	0.0465556
STOX2	-1.34769	0.00506945
KAT6B	-1.34768	0.00125912
LRRN4CL	-1.34763	0.0331603
CDC42BPA	-1.3475	0.000670339
MOB1B	-1.34714	0.000758158
HIST1H2BN	-1.34675	0.0999062
SESN3	-1.34668	0.0339311
GDPGP1	-1.3464	0.0124134
MAPK6	-1.34626	0.0329322
RBM43	-1.34494	0.0905027
ZFYVE28	-1.3448	0.0804623
TRAM2	-1.34469	0.0028962
FXYD6	-1.34454	0.000741234
PSME4	-1.34414	0.00635767
P2RX5	-1.34326	0.0952746
MICAL2	-1.3431	0.046505
CRAT	-1.34255	0.00484061
TMIE	-1.34238	0.0732731
SRD5A1	-1.34223	0.0424711
SUSD1	-1.34187	0.0697299
OSBPL7	-1.34136	0.0910797
SUGT1P1	-1.34135	0.0334457
RARG	-1.3413	0.00301474
PLAU	-1.3412	0.076547
COL15A1	-1.34109	0.0481177
C22orf46	-1.34076	0.0271296
PEG3	-1.3402	0.0986056
ARHGAP22	-1.33992	0.0355622
ITM2A	-1.33929	0.00602312
UNC93B1	-1.33908	0.0441547
RHOQ	-1.33881	0.0117648
NIT2	-1.3388	0.00125166
RAB11B-AS1	-1.33852	0.0437647
PDLIM7	-1.33814	0.0624743
UBE2L6	-1.33814	0.0672041
TM7SF3	-1.33777	0.00672004
NAA60	-1.33758	0.00156659
TXNDC15	-1.3374	0.00612301
PKIG	-1.33653	0.00825372
SLC38A3	-1.33567	0.0516814
TWF2	-1.33531	0.0553103
ZNF761	-1.33531	0.0407854
SNAI2	-1.33488	0.0408634
LYN	-1.33479	0.0888451
IFIT1	-1.33458	0.0133189
SLC25A42	-1.33444	0.0186676
ENO2	-1.33408	0.0906344
FERMT3	-1.33375	0.07179
TNXA	-1.33351	0.0496453
RCBTB1	-1.33348	0.0092902
ITGAE	-1.33239	0.0223988
COQ2	-1.33154	0.00593599
ASPRV1	-1.33145	0.0715367
PPFIA4	-1.33033	0.023466
PTPN13	-1.33012	0.0725118
GNA14	-1.32952	0.0839018
FAM136A	-1.32937	0.0143184
DUSP18	-1.32886	0.0600953
NAP1L1	-1.32875	0.00209292
AKAP13	-1.32802	0.0109544
KATNBL1	-1.32786	0.0184043
ITGB1BP2	-1.32786	0.0199302
CDK2AP1	-1.32777	0.023125
CCDC144B	-1.32755	0.0985059
ERVK13-1	-1.32748	0.0711366
ENTPD7	-1.32704	0.0760984
FAM22A	-1.32659	0.0428655
CAMK2D	-1.32632	0.0626564
FBXL8	-1.3258	0.0818827
C1orf85	-1.32516	0.0401355
BMP4	-1.32468	0.0112603
L3HYPDH	-1.32434	0.0115488
CCDC102A	-1.32415	0.0934613
SIPA1	-1.32379	0.034326
PLBD1	-1.32342	0.00141786
TPRN	-1.32281	0.00594069
ME1	-1.32264	0.016963
MTERF	-1.32223	0.0226496
LOC646903	-1.32197	0.0770634
GTF2H3	-1.32177	0.026073
LBH	-1.32167	0.0723502
PKD1L1	-1.32161	0.0587
NFKBIZ	-1.32149	0.0542482
FBXO17	-1.32146	0.0801587
TSSC1	-1.32129	0.00483095
CALU	-1.32114	0.00820901
NCKAP1	-1.32108	0.0242972
LACE1	-1.32093	0.0379775
ARMCX2	-1.32076	0.0635193
MAP3K5	-1.32032	0.0537728
GBE1	-1.32017	0.0174604
YPEL1	-1.31978	0.0671489
RGS14	-1.31878	0.0949971
BCKDHB	-1.31787	0.0187016
OLFML3	-1.31777	0.0974228
SMPX	-1.31759	0.0293316
WNT11	-1.31677	0.0219495
KRAS	-1.31538	0.0257542
C9orf85	-1.31516	0.0428685
ATP1B4	-1.31492	0.0363272
TIMP2	-1.31492	0.0858612
ADI1	-1.314	0.0480782
RNASET2	-1.31384	0.0326721
PRMT2	-1.31335	0.017431
AGTRAP	-1.31292	0.0105106
CLIC1	-1.31289	0.0538222
PLEKHA6	-1.31288	0.0499922
STK10	-1.3123	0.0344146
HOOK2	-1.31116	0.0368845
B4GALNT1	-1.31066	0.0721643
SLC16A5	-1.31032	0.0764353
CMTM3	-1.31031	0.0849253
CAMK2N1	-1.30961	0.0140896
SLC44A1	-1.30953	0.00713249
METRNL	-1.30931	0.0787497
DRAM2	-1.3093	0.00450286
RAB4A	-1.30918	0.0652422
CPT2	-1.30863	0.0410641
CLIP3	-1.30857	0.0866793
HSPA13	-1.30841	0.00603969
ZBED3	-1.30816	0.050812
CTDSPL	-1.30812	0.069808
ARMCX6	-1.30783	0.0265778
PRKCA	-1.30776	0.0827946
TNFRSF21	-1.30768	0.0915503
GBP2	-1.30721	0.098715
THBD	-1.30699	0.0629341
CNN3	-1.30658	0.077363
ULK2	-1.30549	0.0107112
GSN	-1.3051	0.0412736
ARL13B	-1.30491	0.0927753
ACAT1	-1.30489	0.0327468
RRAGD	-1.3048	0.00800573
KIAA1522	-1.30432	0.0399217
TCTN1	-1.30293	0.031188
GIPC3	-1.30231	0.075833
ZNF853	-1.30196	0.0325223
UCHL5	-1.30186	0.0177091
ITIH5	-1.30179	0.092922
UBE2V1	-1.30115	0.0881787
LOC100506451	-1.3009	0.0948831
SAMHD1	-1.29998	0.0454501
PKN1	-1.29997	0.0460274
ZNF684	-1.29939	0.0914448
CLEC3B	-1.29928	0.047273
P2RX6	-1.29907	0.00872214
ANKRD50	-1.29894	0.0390033
CDKN3	-1.29892	0.0671108
NPR2	-1.29887	0.000128768
KDM5B	-1.29848	0.0455327
HMGN1	-1.29813	0.0112159
CADM2	-1.29769	0.0571006
KIAA1551	-1.29755	0.0163263
ANKRD52	-1.29669	0.0531843
C12orf49	-1.29648	0.0560363
CFH	-1.29643	0.0993153
KANK2	-1.29626	0.0463599
CDADC1	-1.29604	0.004535
PLEKHG5	-1.29595	0.0736109
FHOD3	-1.29576	0.0628027
MXRA8	-1.29531	0.0980501
ARAP1	-1.29515	0.000913888
FILIP1L	-1.29466	0.0882089
GPR133	-1.29402	0.0423803
SCARNA15	-1.29391	0.0490137
DESI1	-1.29349	0.0109853
SCLT1	-1.29252	0.0523768
SEMA3B	-1.29245	0.0777255
ASAP2	-1.29223	0.0485001
FKBP7	-1.29207	0.0470848
PARP4	-1.29203	0.0260745
SLC8A3	-1.29188	0.0472272
HSPB6	-1.29136	0.0924802
MRPL33	-1.29133	0.0214871
PPIC	-1.2911	0.00415234
ARPC1B	-1.29101	0.0542632
FBXO40	-1.29049	0.087028
AVPR1A	-1.29014	0.0979267
AGXT2L2	-1.28993	0.0181033
RBBP9	-1.28979	0.00205361
TMEM126B	-1.28957	0.0292323
TXNL1	-1.28946	0.0032
CYFIP2	-1.28885	0.0627185
SRR	-1.28836	0.0273545
MFSD1	-1.28791	0.00887664
DNAJC4	-1.28764	0.00363891
C11orf24	-1.2874	0.00797113
ZNF623	-1.28732	0.0705784
ANKRD13B	-1.28677	0.0564333
CTSZ	-1.28592	0.0281626
FAM91A1	-1.28581	0.0744365
SLC16A4	-1.28573	0.0753504
TPK1	-1.2857	0.0866737
PBLD	-1.28569	0.0379906
RABL2A	-1.28548	0.0983111
TRAM1	-1.28526	0.012677
TSEN15	-1.2848	0.0149476
ACTR3	-1.28448	0.0139267
FAM129B	-1.2844	0.00334398
NLGN2	-1.28412	0.0119228
CXCL12	-1.28397	0.063713
IDUA	-1.28369	0.0889374
ZSWIM4	-1.28359	0.0772884
KIAA1671	-1.28347	0.0748662
TNFAIP2	-1.28305	0.0290848
OPLAH	-1.28279	0.0349965
ARHGAP35	-1.28267	0.00415324
PGAP3	-1.28253	0.0104067
RAB6B	-1.28226	0.0458406
CTNNAL1	-1.28172	0.0271063
BTBD9	-1.28156	0.000232863
RAB34	-1.28148	0.0455986
GLI2	-1.28124	0.0656312
TAGLN2	-1.28101	0.0337821
XKR8	-1.28084	0.0324715
FKBP9	-1.2803	4.95704e-05
ARHGEF17	-1.27996	0.0237461
FBXL19	-1.27991	0.0388989
AP3S1	-1.27949	0.0946839
TTC7B	-1.27946	0.0077595
IQCG	-1.27891	0.0868643
MYH14	-1.27859	0.0162664
NINJ1	-1.27847	0.0132672
TCTA	-1.27824	0.00635467
C17orf70	-1.27807	0.00638702
IL10RB	-1.27771	0.0708298
DCHS1	-1.27761	0.035404
EFCAB11	-1.27731	0.0998103
EGFL8	-1.27709	0.0885722
EPB41L2	-1.27683	0.0464451
VAMP8	-1.27672	0.0182981
LRSAM1	-1.27663	0.00456475
PHTF1	-1.27644	0.0630702
ALG8	-1.27619	0.0109202
DNAJC28	-1.27616	0.0773235
BNIP2	-1.27581	0.000108883
PPP2R5B	-1.27558	0.0036801
CDK6	-1.27486	0.0362187
FAM210B	-1.27484	0.00844056
RGN	-1.27459	0.0183234
EFHA1	-1.27447	0.0106276
NXPE3	-1.27438	0.0605037
NT5M	-1.27413	0.073711
FMNL3	-1.27407	0.0166608
CKAP4	-1.27381	0.0255282
PEX10	-1.27376	0.011211
SARM1	-1.27323	0.0406933
ZFP64	-1.27289	0.00537016
HSPG2	-1.27248	0.0649434
SH3BGR	-1.27231	0.0436004
HEG1	-1.27208	0.00906931
MAPRE2	-1.2718	0.01591
SMEK1	-1.27171	0.0286555
SH3BGRL3	-1.2717	0.0417949
PVR	-1.27161	0.0715148
ERLIN1	-1.271	0.0956268
CLIC2	-1.27075	0.0792305
TRIM8	-1.27065	0.000539556
ZKSCAN2	-1.27053	0.0812623
RNASEL	-1.27044	0.0570871
GSS	-1.27021	0.00966104
MTA3	-1.26984	0.00220065
DPY19L3	-1.2698	0.0041161
TSPAN9	-1.26944	0.0891444
ABCD1	-1.26942	0.0295152
C5orf51	-1.26936	0.0639
GUF1	-1.26923	0.0166608
VASH1	-1.26922	0.0396128
AMZ2	-1.26918	0.0393303
ANKRA2	-1.26912	0.00841367
SEC24D	-1.26878	0.0724557
PRKAR2A	-1.26873	0.0032326
ZDHHC4	-1.2684	0.011638
CCNG2	-1.26829	0.067271
CHP1	-1.26792	0.000761527
MYD88	-1.26777	0.0710419
NAGLU	-1.26768	0.050829
SOGA2	-1.26765	0.0600199
LTBP3	-1.2673	0.00132272
FAM188B	-1.26594	0.0648536
DENND2A	-1.26591	0.0360789
ODF2	-1.26556	0.075578
CARHSP1	-1.26493	0.0222884
CDK8	-1.2649	0.000394756
MCRS1	-1.26482	0.0158112
TMEM141	-1.26431	0.0111766
HOXC10	-1.26411	0.0626492
ACADVL	-1.26358	0.0385842
UNC119	-1.26335	0.0402323
LOC100506746	-1.26291	0.0576694
SOBP	-1.26256	0.00452929
MCU	-1.26246	0.00890476
LTBP4	-1.26243	0.0837426
SERPINH1	-1.26221	0.0844585
CNIH4	-1.26204	0.00240769
PFKL	-1.26182	0.0453989
PPAP2A	-1.26149	0.065925
RP2	-1.26147	0.027975
NDUFA5	-1.26021	0.0345305
HDAC10	-1.26017	0.0804872
SORD	-1.25985	0.0583884
LYPLAL1	-1.25955	0.0362672
MOSPD1	-1.25951	0.0237132
CENPO	-1.25935	0.0317137
EIF2AK3	-1.25891	0.0402976
WBP4	-1.25839	0.0729671
POGLUT1	-1.25759	0.0419309
HN1	-1.25706	0.00843911
PPP1R3A	-1.25705	0.0956087
LOC254128	-1.25677	0.0298237
PPP1R14B	-1.25652	0.05878
PSMD12	-1.25645	0.00997415
RNASE1	-1.25619	0.0961181
SPIN1	-1.2546	0.0830781
FLJ10038	-1.2543	0.0921755
B9D1	-1.25421	0.0730991
BLMH	-1.25405	0.00519114
METAP1D	-1.25396	0.0473951
OAS3	-1.25392	0.0922057
BRE	-1.25357	0.0852818
DCAF13	-1.25352	0.0539698
CBX3	-1.2532	0.00691714
MYLK2	-1.25319	0.0989992
ATPIF1	-1.25307	0.0203885
STARD10	-1.25287	0.0326141
INCA1	-1.25272	0.0499108
PDIA4	-1.25242	0.0702547
ITGA5	-1.2523	0.04594
SH3D19	-1.25229	0.00394023
GALNT1	-1.25201	0.0142324
MAPT	-1.25113	0.0696829
UNC5B	-1.25109	0.0448442
C3orf33	-1.25106	0.0884155
FAM214A	-1.25102	0.00230124
VIT	-1.25091	0.0794393
SYNGR1	-1.2504	0.0484493
OXCT1	-1.2504	0.0843935
GAS1	-1.25038	0.0968368
TNIP2	-1.2501	0.0604254
PIK3R3	-1.24993	0.0502382
CTSH	-1.24959	0.087404
RAP2A	-1.24957	0.0342601
STK40	-1.24884	0.0720462
SNTB2	-1.24876	0.0101453
SEC61A1	-1.24875	0.0174769
ROGDI	-1.24835	0.0830198
EVC	-1.24807	0.0868415
ITPR2	-1.24803	0.0572472
IFNGR2	-1.24801	0.0258939
RABEP2	-1.2477	0.0326195
IFNGR1	-1.24751	0.028701
ASTE1	-1.24733	0.0680768
EXOC6	-1.24721	0.0289449
PPP2R5A	-1.24672	0.0172749
MRAS	-1.24669	0.0190106
TMEM183A	-1.24595	0.0184731
CMC4	-1.24588	0.0310104
SPNS2	-1.24558	0.0943755
GOLGA4	-1.24552	0.0592991
SACS	-1.24543	0.0395233
EPHX1	-1.24536	0.0315711
GORASP2	-1.24515	0.0334016
CAMKK2	-1.24473	0.0623019
DAPK1	-1.2447	0.0301866
FAM210A	-1.2446	0.044529
ITM2B	-1.2446	0.000808825
TXNDC5	-1.24404	0.0381768
FEM1A	-1.24386	0.0361929
ERCC8	-1.24386	0.0894754
UHRF1BP1L	-1.24343	0.0858355
PDE4A	-1.24323	0.0852488
TMEM14A	-1.24295	0.0970716
KTN1	-1.24271	0.0436009
ENGASE	-1.24253	0.0603806
MCCC2	-1.24241	0.0370702
OSTF1	-1.24219	0.0203194
PSMG1	-1.24203	0.0835781
SESTD1	-1.24196	0.0310885
TMEM41B	-1.24196	0.0702122
REXO2	-1.24191	0.0122284
AZIN1	-1.24181	0.0184811
PPCS	-1.24024	0.0128225
GLCE	-1.24019	0.032537
RFTN1	-1.2401	0.0791723
DOCK7	-1.2399	0.0576632
DUS2L	-1.23987	0.0900218
NAA40	-1.23972	0.0829834
LMNA	-1.23955	0.00735903
COPS4	-1.23923	0.0567338
POMGNT1	-1.23913	0.00838714
PTPLA	-1.23877	0.093805
LOC100506990	-1.23844	0.0933458
BACE1	-1.23836	0.0533491
RALGPS1	-1.23833	0.0879461
NAF1	-1.2383	0.043564
NFE2L1	-1.2383	0.0508044
RASAL2	-1.2377	0.0515469
YIPF4	-1.23763	0.0205446
HEATR2	-1.23757	0.00379525
FAM49B	-1.23734	0.0649704
LMBRD1	-1.23719	0.0452648
UGDH	-1.23631	0.0997826
FBXL7	-1.23625	0.0813448
MAFK	-1.23587	0.0667007
C7orf50	-1.23532	0.0401604
DST	-1.23531	0.009289
CHMP1B	-1.2353	0.0448853
PRKACB	-1.23521	0.0184368
ANKRD36	-1.23518	0.0215807
CCNC	-1.23488	0.0333356
APOO	-1.23474	0.0621226
NEK11	-1.23455	0.0269824
FAM109A	-1.23452	0.0789955
RNF168	-1.23443	0.0132156
B3GALT6	-1.23429	0.0337764
PROS1	-1.23417	0.0542516
C7orf73	-1.23412	0.0251339
CST3	-1.23401	0.00849753
CLN5	-1.23401	0.0170964
CDK5	-1.23396	0.0155146
EXTL2	-1.23362	0.0299473
MPC2	-1.23357	0.0222709
ENG	-1.2332	0.0376869
ATRX	-1.23315	0.0109063
ZNF287	-1.23295	0.0258831
RUFY3	-1.23189	0.0121182
FAM45A	-1.23149	0.0423757
ACSL3	-1.23136	0.0642905
ST6GALNAC4	-1.23126	0.0974202
IBA57	-1.23115	0.0394669
PPFIBP1	-1.23063	0.0130559
CCDC106	-1.2295	0.0529886
HEATR3	-1.22927	0.0617987
RAB30	-1.22922	0.0292664
KLHL18	-1.22914	0.0453142
GPN2	-1.22877	0.069913
MXRA7	-1.22817	0.0518084
C15orf52	-1.22815	0.0311862
LRP12	-1.22811	0.0791125
TATDN1	-1.22794	0.0380171
TBX3	-1.22789	0.0713885
RABEP1	-1.22731	0.0723404
FUNDC1	-1.22724	0.0587621
SLC41A1	-1.22712	0.0884905
SAMD1	-1.22689	0.0425921
ARPC5	-1.22663	0.0538781
CTAGE5	-1.22658	0.0654935
GOLIM4	-1.22639	0.000740222
PFDN4	-1.22568	0.0150347
FUCA2	-1.22483	0.0254229
SNAP23	-1.22463	0.00047618
NDOR1	-1.2243	0.0650953
SLC26A2	-1.22408	0.0564582
S100A16	-1.22382	0.060752
RHOJ	-1.22335	0.0664718
IL11RA	-1.22334	0.0433036
HSD17B1	-1.2229	0.0601579
ANXA4	-1.22226	0.0589617
MAGEH1	-1.22219	0.0105095
DENND5A	-1.22201	0.0088765
POT1	-1.22196	0.0643956
TMEM62	-1.22188	0.0554701
GABARAPL2	-1.22168	0.00037454
LRRC23	-1.2212	0.0907414
ZCRB1	-1.22109	0.0535092
VPS13A	-1.22071	0.00331285
PAPOLA	-1.22045	0.062734
TRAPPC6A	-1.2202	0.0442746
MICALL1	-1.22009	0.0123788
EVI5	-1.21958	0.0406715
IFNAR1	-1.21893	0.036698
RUSC1	-1.21858	0.0200638
KCTD11	-1.21804	0.0501291
AHI1	-1.21797	0.0823162
ARHGAP23	-1.21768	0.0966455
AASDHPPT	-1.2176	0.0512528
C17orf103	-1.21734	0.0405304
DNAJC15	-1.21692	0.0614234
DNA2	-1.21675	0.0816734
EVI5L	-1.21665	0.029647
MUL1	-1.21658	0.0202074
SLC25A20	-1.21656	0.0591374
NARG2	-1.21633	0.0120935
MSRA	-1.21601	0.0487587
POPDC3	-1.21598	0.0829334
FSD1L	-1.21593	0.050866
SH3PXD2A	-1.2158	0.0509463
PACS1	-1.21569	0.0107762
BNIP3	-1.21555	0.0623774
WWP1	-1.21527	0.0888695
REEP1	-1.21489	0.0049441
SLN	-1.21486	0.0651984
C8orf82	-1.21456	0.0481095
STK38	-1.21408	0.0315826
AP5M1	-1.21391	0.0187422
OS9	-1.21341	0.00612408
CPSF2	-1.2134	0.0346819
FAM89B	-1.2133	0.0899092
PRKG1	-1.21295	0.0741024
ARV1	-1.21295	0.0167247
GBAS	-1.21287	0.0737724
RGPD8	-1.21286	0.0937665
PPP1R9B	-1.21254	0.0197139
MKKS	-1.21219	0.0698849
NDST1	-1.21158	0.00277754
DESI2	-1.21124	0.0453097
ZNF182	-1.21123	0.0974668
NIPSNAP3B	-1.21101	0.0908167
GM2A	-1.21086	0.0224882
WIPI1	-1.21082	0.0564485
ZNF43	-1.21082	0.0902583
TMEM8A	-1.21073	0.0345318
ITM2C	-1.21056	0.0945031
MRPL22	-1.21055	0.00310822
STT3B	-1.20995	0.00381222
BCAP29	-1.20987	0.0311043
ITGB1	-1.20955	0.0129263
CECR5	-1.20937	0.0548827
POLD4	-1.20877	0.0523312
PPDPF	-1.20866	0.0806423
ZFP161	-1.20814	0.0911067
DNASE2	-1.20801	0.0636586
FNBP1	-1.20759	0.0119352
LHPP	-1.20654	0.0610504
NUP153	-1.20598	0.00492589
SLC35E2B	1.20649	0.0104379
U2AF1	1.20662	0.00156372
TRMT112	1.2067	0.0076295
OGFR	1.20674	0.0445666
SNORA10	1.20817	0.0399312
TXLNB	1.20818	0.0430893
GGA3	1.20863	0.00474034
LMBR1L	1.20869	0.0244792
CDK17	1.20877	0.0299944
SUPT16H	1.2088	0.0128168
PRPSAP1	1.20888	0.0509203
KAT5	1.2089	0.00010769
NENF	1.20973	0.0320539
COG6	1.20985	0.0685706
MYOZ1	1.21008	0.00924587
HIST1H2BD	1.2101	0.0907326
ANKRD49	1.21018	0.0853286
TGS1	1.21054	0.0909602
MRPL42	1.21057	0.0079993
ELOF1	1.2106	0.00911836
DCPS	1.21109	0.0199759
SP4	1.21111	0.0110496
UHRF2	1.21122	0.00731216
SSRP1	1.21139	0.000660997
SP1	1.2114	0.00100164
EPC2	1.2115	0.00244234
CELSR2	1.21159	0.075262
LBR	1.21165	0.0371924
TOB2	1.21177	0.0569471
RPS20	1.21177	0.00177717
ASXL1	1.2119	0.00972016
RPL27	1.21235	0.0216997
NPC1	1.21243	0.0195549
PPIL4	1.21256	0.0423389
ALDOA	1.21283	0.0489151
USP30	1.21286	0.00412579
STX12	1.21288	0.0616457
TSEN2	1.21297	0.00528048
ZCCHC3	1.21306	0.0108998
HTT	1.21315	0.0124298
SLC2A11	1.21336	0.0817243
SOX6	1.21347	0.0558867
ASB8	1.21354	0.014811
ZNF121	1.21395	0.0076079
RPL10A	1.21397	0.0181436
DNAJC9	1.21422	0.0669094
ZNF395	1.21452	0.0165749
LAS1L	1.21467	0.00441995
DVL2	1.21491	0.0287924
ZNF615	1.21501	0.0988529
CDNF	1.21522	0.0505517
BET1L	1.21534	0.0231648
MBNL1	1.21544	0.00575528
SNORA2A	1.21561	0.0626327
ZNF324	1.21572	0.0751048
ELL	1.21596	0.0282079
ZNF496	1.2162	0.00340363
RPS3A	1.21631	0.00129085
NUP35	1.21634	0.0207929
RPS25	1.21663	0.00634377
SYF2	1.21664	0.00234076
SHMT1	1.21725	0.0660297
ZNF324B	1.21861	0.0647992
RPS16	1.2189	0.0168351
HEATR5B	1.2189	0.000561747
EAF1	1.21936	0.000945739
SNORA5A	1.2196	0.042277
SURF1	1.21965	0.0155562
HSF2	1.21965	0.0423087
BTBD3	1.21972	0.0160139
UCK1	1.21993	0.0105149
SNORA34	1.22027	0.0161042
WHSC1L1	1.2204	0.000493486
NIPA1	1.22063	0.0334089
ZNF529	1.22064	0.0272308
POLD1	1.2207	0.0927173
TDRKH	1.22078	0.0360554
FGF13	1.221	0.00638383
ZNF238	1.22122	0.0562308
SBF2	1.22159	0.0037438
SLC30A1	1.22159	0.098305
RFC3	1.22161	0.0515348
TESK2	1.22171	0.0891644
OSBP	1.22186	0.00788352
RPL9	1.22194	0.0310657
KAT8	1.22229	0.0137948
DUSP27	1.22243	0.00845613
PHRF1	1.22265	0.00474712
FBL	1.22274	0.00179161
LGALSL	1.22315	0.0912654
RPL21	1.22349	0.00660298
CEP89	1.2236	0.0732405
TRIM28	1.22381	0.0153225
AATF	1.22392	0.0143
TUT1	1.22392	0.0107134
MOCS1	1.22403	0.0200733
MLL	1.22436	0.00504841
TNNI2	1.22457	0.0679803
MITD1	1.22464	0.00910548
RBMX	1.22469	0.0115023
SNRPD1	1.2247	0.000190659
DUSP28	1.22475	0.0227456
TAF3	1.22485	0.012942
SERTAD3	1.22488	0.0662498
TUBB	1.22488	0.0311667
STAG1	1.22507	0.00312076
CCS	1.22553	0.0132724
KLHL30	1.22616	0.0703329
RPS15	1.22621	7.41069e-05
RBM5	1.2268	0.00941136
EIF3F	1.22686	0.00127485
ARF1	1.22712	0.000483611
CPEB2	1.22724	0.078089
RPS12	1.22747	0.00146653
PPP6C	1.22749	0.0032435
FIGF	1.22764	0.0391769
LIN37	1.22858	0.00734538
STAG2	1.2288	0.0163726
LOC285074	1.22881	0.0377528
ZNF84	1.22893	0.0411964
ZNF343	1.22895	0.0500099
STK39	1.22912	0.0751559
LOC254100	1.22997	0.0687319
GFRA1	1.23014	0.0952232
DNAJB5	1.23105	0.0523683
RPL37A	1.23121	0.00257087
ZW10	1.23126	0.0166652
CEP44	1.23191	0.0823499
TIE1	1.232	0.0975966
TCEA1	1.23201	9.45085e-05
BRAT1	1.23241	0.00591235
CPSF3L	1.23255	0.00316466
TPGS2	1.23258	0.00461078
L3MBTL2	1.23288	0.0272875
WFS1	1.23331	0.0397871
LENG1	1.23335	0.0147783
ARID4B	1.23351	0.01812
UBE4A	1.23372	0.0422901
RPL35	1.23373	0.00415272
BRIX1	1.23396	0.000133489
TRAPPC2L	1.23396	0.0158763
GPIHBP1	1.23408	0.0796853
PHF13	1.23457	0.0555679
NOP56	1.23471	0.00220253
HNRNPA1L2	1.2351	0.0181433
ZSWIM5	1.23533	0.0728579
CCDC66	1.23561	0.0199393
APOM	1.23567	0.093347
FAM175A	1.23591	0.0206218
BARD1	1.236	0.0301977
MED11	1.23618	0.00754959
ZFYVE19	1.23645	0.0296034
TIMM50	1.23657	0.0362469
H1F0	1.2367	0.0270389
MPDZ	1.23673	0.02324
SLU7	1.23694	0.000341025
ABLIM2	1.23711	0.0527038
CDK11B	1.23735	0.00322345
ZNF689	1.23757	0.0226432
NAA10	1.23759	0.00563274
GTF2IRD1	1.23761	0.0223364
ZNF462	1.23791	0.0831523
LIX1L	1.23816	0.0121536
SMAD3	1.23825	0.00307186
RIOK1	1.23829	0.0149184
SRBD1	1.23855	0.0389512
SAFB	1.23866	0.00027582
ZFP28	1.2389	0.031982
ASB7	1.23963	0.0420397
CDKN2AIP	1.23982	0.00200734
CDH15	1.23997	0.0155757
RORC	1.24056	0.0909639
PHF17	1.2406	0.0204287
FAAH	1.24069	0.0941602
CD74	1.24078	0.0747395
STAT5A	1.241	0.048831
LDB2	1.24107	0.0594532
SCAPER	1.24107	0.0136776
SCARNA1	1.24139	0.0838545
ZNF566	1.24142	0.0445458
SF3B3	1.24181	0.00102096
MAT2A	1.24203	0.00788021
PHLPP2	1.24207	0.0168235
NUP155	1.24224	0.0109372
DCAF16	1.24233	0.0752291
POLR1E	1.2424	0.0185986
PPP1R14C	1.24243	0.0896078
SNORA16A	1.24248	0.0409418
GPR56	1.24262	0.0374361
MKLN1	1.24302	0.0020418
ZAK	1.24309	0.0912212
EXOC8	1.24436	0.00375301
RELA	1.24453	0.00210741
EFTUD1	1.24455	0.00172116
RSL24D1	1.24456	1.50745e-05
PER3	1.24483	0.0768841
TCEA3	1.24486	0.0139873
RBM4B	1.24516	0.00539721
SETMAR	1.24528	0.0744146
GPD2	1.24585	0.0572526
RPL10	1.24612	0.000939361
AGSK1	1.24665	0.0183656
H2AFZ	1.24673	0.0010977
EXOSC8	1.24735	0.00449188
CCP110	1.24746	0.0103434
PFDN6	1.24819	0.00988695
RPS19	1.24842	0.000903575
ZNHIT2	1.24851	0.0125167
KIAA1919	1.24913	0.0226185
CCDC130	1.24974	0.0071705
TFB1M	1.25035	0.0762774
HMGXB4	1.25038	0.013525
LRRC8D	1.25043	0.07949
SOX13	1.25064	0.0536522
ZNF354C	1.25076	0.0378233
JSRP1	1.25077	0.00460972
ACIN1	1.25081	0.0155105
GFER	1.25097	0.0135115
TSPAN15	1.25117	0.0648976
SURF2	1.2513	0.0119627
ZSCAN18	1.2515	0.0584389
PILRB	1.25165	0.0325303
TBCK	1.25166	0.0222447
RPS2	1.25271	0.00341865
GCC2	1.25284	0.00025397
TADA2A	1.25301	0.0229597
C7orf13	1.25325	0.0813774
RPL34	1.25368	0.0800255
SIVA1	1.25395	0.05114
TTC12	1.25424	0.0974785
NOP2	1.25452	0.00230781
RPL38	1.25476	0.0137271
SEMA6B	1.2548	0.0937126
AMIGO1	1.25509	0.096883
ERCC6	1.25573	0.00222699
KDR	1.25597	0.0895926
SCARNA17	1.25613	0.0588125
PELI3	1.25622	0.0100624
RPS10	1.25653	0.00096959
NAT10	1.25657	0.0102922
ZNF773	1.25666	0.0810957
FUBP1	1.25689	0.000138889
CDKN1B	1.25729	0.00109368
TMCO6	1.25763	0.0346199
PI4KAP1	1.25796	0.0895978
SNORA43	1.25798	0.0286456
TGFBR3	1.25809	0.0923008
DNAJC17	1.25815	0.0426994
ZSWIM3	1.25838	0.0588908
MGMT	1.25841	0.0651157
FAM129A	1.25857	0.0194121
RPS6KA5	1.25877	0.0126683
NAPRT1	1.25997	0.0795902
PIR	1.26008	0.00949678
ERBB4	1.26022	0.0337285
FLAD1	1.26043	0.0207282
ACADL	1.26079	0.0643863
FANCC	1.26084	0.0823936
IK	1.26087	9.66389e-05
KLHL24	1.26097	0.00617685
INCENP	1.26142	0.0044208
SNORA27	1.26142	0.0330914
PATZ1	1.26198	0.0321393
HMGB1	1.26249	0.00412209
GCLC	1.26256	0.00518287
RPS9	1.26302	0.00210911
RPL24	1.26307	0.00086126
GLTSCR1	1.26321	0.0168108
FGGY	1.26335	0.0844916
DDX18	1.26335	0.00125205
ZNF180	1.26336	0.0594228
LOC202181	1.26346	0.0325325
RCOR3	1.26364	0.000419631
LRRC49	1.26424	0.0180017
CEP128	1.26458	0.0275047
CLK3	1.26485	0.00149345
ZCCHC8	1.26499	0.00138404
ZCCHC2	1.26501	0.0183513
MN1	1.26505	0.0165413
ING3	1.26511	0.0104105
MRPL49	1.26541	0.00410314
SGPL1	1.26552	0.0347027
ZNF34	1.26569	0.0269253
ACSS3	1.26622	0.0210745
ANKRD27	1.26627	0.0205165
SNORA24	1.26657	0.00675471
SF1	1.26667	0.00385578
N4BP2	1.26699	0.0788669
ZNF767	1.26727	0.0282746
ZNF692	1.26752	0.0121445
NKTR	1.26752	0.0227855
EMG1	1.26779	7.51242e-05
CDKN1C	1.26785	0.0302451
ZNF596	1.26855	0.0213795
PITHD1	1.26904	0.000692263
SNORA55	1.26929	0.0383227
ZNF653	1.26971	0.020561
TMEM97	1.2698	0.0156642
EIF4H	1.2698	0.000418697
ICAM2	1.26998	0.021706
TRMT5	1.27001	0.0120066
RRM1	1.27027	0.00733083
KLHL23	1.27071	0.0600106
TEX10	1.2709	0.00345485
PYGM	1.27101	0.00651949
SNORA71B	1.27144	0.0672325
ZNF333	1.27171	0.00285336
RPS5	1.27177	0.00126479
SCARNA16	1.27194	0.00146548
EXOC4	1.27234	0.00935694
ZNF595	1.27237	0.0197875
SCARNA13	1.27245	0.00920324
ATXN1	1.27298	0.00302144
DAPK2	1.27335	0.0187436
YPEL2	1.27388	0.0102794
CTNS	1.27422	0.0436354
BACH1	1.27429	0.0121272
SLAIN1	1.27474	0.0272502
ACTR5	1.27535	0.0290003
SAV1	1.27619	9.4113e-05
SNORA50	1.27638	0.0138503
TMEM68	1.27666	0.0133708
ZXDA	1.27682	0.0501287
ATXN7L1	1.27735	0.0548302
IFT46	1.27737	0.000389047
UBE3D	1.27738	0.00447384
RFC4	1.27748	0.0127686
NAPB	1.27755	0.0639551
MRPL55	1.27761	0.0679804
PCNT	1.27775	0.00709375
MED15	1.27806	6.3088e-06
PTPN3	1.27832	0.0601959
SNORA14B	1.2784	0.0322987
ZNF268	1.27858	0.0359182
FZD7	1.27865	0.0743854
SIRT1	1.27876	0.0028716
TIFA	1.27898	0.0891613
C9orf114	1.27969	0.00613638
FOSL2	1.2799	0.0461637
CLTCL1	1.2807	0.00227231
PXDC1	1.28127	0.0871221
WDR3	1.2816	0.000613959
RNF144A	1.2816	0.0281541
ZNF593	1.28207	0.017616
RPL13AP20	1.28269	3.37558e-06
PRTG	1.28283	0.0815233
VPS53	1.28352	0.00379301
PLAGL2	1.28361	0.0304194
DYRK2	1.28381	0.0273563
NEURL4	1.28416	0.00116058
SCARNA10	1.28434	0.000412247
FAM160A1	1.28471	0.00274735
TBC1D4	1.28503	0.000509948
MYH2	1.28506	0.00786836
ZCCHC16	1.28512	0.0236399
RPS11	1.28571	4.79823e-05
ZNF573	1.286	0.0110413
SMYD4	1.2862	0.0147433
ACTL6A	1.28642	0.0142955
DRG1	1.28663	0.000106991
RNPC3	1.28694	0.00663831
CRY2	1.28718	0.00108942
RPS27	1.28784	0.00109031
DDX55	1.28791	0.00269059
ANXA3	1.28859	0.0478786
PAQR3	1.28862	0.0265529
TMTC1	1.28977	0.0469848
SNORA49	1.29004	0.00505191
ERN1	1.29007	0.0306222
RPS6KB2	1.29033	0.00228162
NSUN5P1	1.29042	0.0225547
RRS1	1.29043	0.00613036
RBM14	1.29047	0.00855142
TRIM55	1.29052	0.0106915
ZNF574	1.29127	0.00123579
RFC2	1.29135	0.00545823
SLC43A1	1.2918	0.044871
RIC3	1.29186	0.0689005
RPL8	1.29243	0.000121081
NUP98	1.29286	0.000315402
TLN2	1.29318	0.0168061
MYF6	1.29355	0.0221681
MLL4	1.29383	0.000427558
PPFIA1	1.29445	0.00248635
RNF150	1.29503	0.00748732
RAB3GAP2	1.29522	0.00154869
RBBP5	1.29578	0.066711
HIC2	1.29581	0.0573139
TOR1AIP1	1.29622	4.62626e-05
MRPS31P3	1.2969	0.0319967
CCBL1	1.29701	0.0155567
MZT2A	1.29808	0.0284826
SLC35E2	1.29818	0.0847972
RIOK2	1.29822	0.000581771
RPS3	1.29828	0.00560757
ACVR2B	1.29846	0.00819249
SH3RF2	1.29892	0.0368398
ZNF461	1.29899	0.0237124
AFF1	1.29905	0.00175536
DOT1L	1.29996	0.0454553
ZNF17	1.30018	0.00513969
PRMT10	1.30073	0.0333577
CREBRF	1.30105	0.00122976
FAM207A	1.30181	0.0116218
ACPL2	1.30187	0.00811293
ANKS3	1.30209	0.0645028
SCARNA12	1.30228	0.00531965
MED30	1.30252	0.00559957
FEN1	1.30259	0.00808036
N4BP2L1	1.30274	0.0872726
FIGNL1	1.30308	0.0122607
CLK4	1.30313	0.00602955
TMEM116	1.30369	0.01788
NOC4L	1.3042	5.8216e-05
CCDC138	1.30525	0.0196525
UTP14A	1.30545	0.0113134
GOLGA6L9	1.30569	0.0499435
STX11	1.30663	0.070455
MCF2L	1.30696	0.0251909
MYO10	1.30704	0.0054923
FAM50A	1.30734	0.000827357
MIIP	1.30761	0.00109182
CACNG1	1.30769	0.00175182
CLTA	1.3078	0.0102379
ZNF791	1.30864	0.000178172
PHLPP1	1.30936	0.0075795
EXOSC9	1.31024	0.00191393
KBTBD5	1.31047	0.0948471
USP45	1.31061	0.0281642
SNORA7B	1.31064	0.0123373
RPS28	1.31103	0.000144619
LOC100289230	1.31229	0.0352308
BYSL	1.31318	0.00038372
AP1AR	1.31351	0.0623508
VRK1	1.31357	0.00670521
RPL35A	1.31392	0.00113633
TMEM80	1.31438	0.0338137
FAM185A	1.31444	0.0538418
ZNF70	1.31468	0.0492772
KLHL25	1.31491	0.0724339
SNORA64	1.3162	0.0166398
CCDC101	1.31626	0.0112605
LNX1	1.31656	0.040878
DHPS	1.31679	0.00451412
CROCC	1.31701	0.0512473
TNFRSF10B	1.31754	0.0296297
KCNJ2-AS1	1.31808	0.0517094
FAM176C	1.31836	0.0192337
CNST	1.31872	0.00101103
ATP2A1	1.31875	0.0176465
SUV39H1	1.31934	0.00169598
ZNF224	1.31995	0.0749978
USP54	1.32029	0.00769916
AGAP7	1.32037	0.0940766
TAF1A	1.32073	0.0235712
[truncated: 488 more rows]

## Sheet: Table S8
Supplementary Table S8. Differentially expressed muscle genes in external dataset in GSE 18832 at 1.2 Fold change and p < 0.1 related to Figure 9
ID	Gene	Fold Change	p-value
205960_at	PDK4	30.88	0.0003
1562321_at	PDK4	13.64	6.64e-05
205442_at	MFAP3L	9.36	0.0099
225207_at	PDK4	6.16	0.0005
209728_at	HLA-DRB4	4.82	0.0002
202237_at	NNMT	4.79	0.0455
202238_s_at	NNMT	3.59	0.0477
228758_at	BCL6	3.56	0.001
200648_s_at	GLUL	3.3	0.0462
210655_s_at	FOXO3B	3.16	0.0184
202723_s_at	FOXO1	2.77	0.0038
203973_s_at	CEBPD	2.7	0.0145
217202_s_at	GLUL	2.7	0.0407
204567_s_at	ABCG1	2.63	0.008
230913_at	ABCG1	2.59	0.0018
207992_s_at	AMPD3	2.59	0.0907
209829_at	FAM65B	2.53	0.049
201236_s_at	BTG2	2.52	0.0013
242281_at	GLUL	2.44	0.0179
203021_at	SLPI	2.4	0.0189
215990_s_at	BCL6	2.39	0.0337
228188_at	FOSL2	2.36	0.0007
203980_at	FABP4	2.34	0.0417
230090_at	GDNF	2.2	0.0837
212671_s_at	HLA-DQA1	2.18	0.0174
204132_s_at	FOXO3B	2.17	0.0065
230643_at	WNT9A	2.17	0.004
36711_at	MAFF	2.16	0.0209
227444_at	ARMCX4	2.08	0.0633
201235_s_at	BTG2	2.07	0.0049
208937_s_at	ID1	2.07	0.0793
202887_s_at	DDIT4	2.06	0.0724
225056_at	SIPA1L2	1.99	0.0421
206302_s_at	NUDT4	1.98	0.002
223652_at	AS3MT	1.97	0.0363
223296_at	SLC25A33	1.96	0.0879
232180_at	UGP2	1.96	0.0029
201329_s_at	ETS2	1.94	0.002
244623_at	KCNQ5	1.94	0.0003
226099_at	ELL2	1.91	0.0265
203140_at	BCL6	1.9	0.0002
225380_at	PKDCC	1.9	0.0621
208581_x_at	MT1X	1.88	0.0393
216913_s_at	RRP12	1.88	0.0635
203579_s_at	SLC7A6	1.88	0.0194
214919_s_at	EIF4EBP3	1.87	0.017
234987_at	SAMHD1	1.87	0.0229
201041_s_at	DUSP1	1.86	0.0286
221031_s_at	APOLD1	1.84	0.0388
221539_at	EIF4EBP1	1.84	0.0687
204131_s_at	FOXO3	1.84	0.0039
239835_at	KBTBD8	1.83	0.0519
222209_s_at	TMEM135	1.83	0.0701
1556134_a_at	B3GNT5	1.82	0.091
225612_s_at	B3GNT5	1.82	0.0185
203549_s_at	LPL	1.82	0.0836
214203_s_at	PRODH	1.81	0.0028
208998_at	UCP2	1.81	0.0276
212614_at	ARID5B	1.8	0.0665
229455_at	LOC102723694	1.8	0.0054
209425_at	AMACR	1.78	0.0325
212183_at	NUDT4	1.78	0.0025
232081_at	ABCG1	1.77	0.0013
1560018_at	ARPP21	1.77	0.0497
212501_at	CEBPB	1.77	0.0039
1553613_s_at	FOXC1	1.77	0.0365
215001_s_at	GLUL	1.76	0.0615
204326_x_at	MT1X	1.76	0.0637
203946_s_at	ARG2	1.75	0.081
1559410_at	LOC105369360	1.75	0.002
218002_s_at	CXCL14	1.74	0.0598
205945_at	IL6R	1.74	0.0373
202861_at	PER1	1.74	0.0378
202743_at	PIK3R3	1.74	0.0015
219566_at	PLEKHF1	1.74	0.0245
219355_at	CXorf57	1.73	0.0535
226800_at	EFCAB7	1.73	0.0599
209185_s_at	IRS2	1.72	0.0564
223802_s_at	RBBP6	1.72	0.0053
226665_at	AHSA2	1.71	0.0517
225107_at	HNRNPA2B1	1.71	0.0326
208109_s_at	LINC00597	1.71	0.0043
204438_at	MRC1	1.71	0.0239
212099_at	RHOB	1.71	0.0229
222204_s_at	RRN3	1.71	0.0139
213017_at	ABHD3	1.7	0.0258
209426_s_at	AMACR	1.7	0.0171
225698_at	EPB41L4A-AS1	1.7	0.0273
231179_at	IP6K3	1.7	0.0236
226814_at	ADAMTS9	1.69	0.0659
202724_s_at	FOXO1	1.69	0.0151
226847_at	FST	1.69	0.088
235315_at	TSC22D1	1.69	0.0159
228334_x_at	CEP44	1.68	0.0112
202937_x_at	RRP7A	1.68	0.0086
201531_at	ZFP36	1.68	0.0507
1556364_at	ADAMTS9-AS2	1.67	0.024
218611_at	IER5	1.67	0.0466
236856_x_at	LOC105371220	1.67	0.0041
210069_at	CPT1B	1.66	0.0654
201328_at	ETS2	1.66	0.0062
228409_at	PLIN4	1.66	0.0871
225539_at	ZBTB21	1.66	0.0227
202284_s_at	CDKN1A	1.65	0.0588
226392_at	RASA2	1.65	0.0015
205074_at	SLC22A5	1.65	0.0415
230992_at	BTNL9	1.64	0.0163
231713_s_at	ELP2	1.64	0.0073
224891_at	FOXO3	1.64	0.0319
202748_at	GBP2	1.64	0.0703
230492_s_at	GPCPD1	1.64	0.0033
228645_at	SNHG9	1.64	0.0217
208810_at	DNAJB6	1.63	0.04
212964_at	HIC2	1.62	0.0182
208808_s_at	HMGB2	1.62	0.0784
200800_s_at	HSPA1A	1.62	0.0108
204346_s_at	RASSF1	1.62	0.0019
226650_at	ZFAND2A	1.62	0.02
225613_at	MAST4	1.61	0.0669
202149_at	NEDD9	1.61	0.0441
201502_s_at	NFKBIA	1.61	0.0012
212274_at	LPIN1	1.6	0.0364
218961_s_at	PNKP	1.6	0.0005
213112_s_at	SQSTM1	1.6	0.0022
243278_at	FOXP2	1.59	0.0545
208961_s_at	KLF6	1.59	0.0535
207078_at	MED6	1.59	0.0166
218869_at	MLYCD	1.59	0.0511
1557432_at	RASAL2	1.59	0.0007
202912_at	ADM	1.58	0.0977
202641_at	ARL3	1.58	0.0012
227558_at	CBX4	1.58	0.0487
225415_at	DTX3L	1.58	0.018
224889_at	FOXO3	1.58	0.0379
212859_x_at	MT1E	1.58	0.0586
36829_at	PER1	1.58	0.0287
228030_at	RBM6	1.58	0.0026
242345_at	COL28A1	1.57	0.0129
243209_at	KCNQ4	1.57	0.0589
203964_at	NMI	1.57	0.0122
222622_at	PGP	1.57	0.0031
232914_s_at	SYTL2	1.57	0.0549
219501_at	ENOX1	1.56	0.0562
239930_at	GALNT2	1.56	0.0015
210983_s_at	MCM7	1.56	0.03
201010_s_at	TXNIP	1.56	0.089
201797_s_at	VARS	1.56	0.0044
203505_at	ABCA1	1.55	0.0909
221009_s_at	ANGPTL4	1.55	0.0363
1552343_s_at	PDE7A	1.55	0.0003
203373_at	SOCS2	1.55	0.0466
1552616_a_at	ACACB	1.54	0.008
232865_at	AFF4	1.54	0.0004
205415_s_at	ATXN3	1.54	0.0031
225685_at	CDC42EP3	1.54	0.0746
209288_s_at	CDC42EP3	1.54	0.0127
1555832_s_at	KLF6	1.54	0.0364
203060_s_at	PAPSS2	1.54	0.0471
225496_s_at	SYTL2	1.54	0.0713
209295_at	TNFRSF10B	1.54	0.0081
211113_s_at	ABCG1	1.53	0.0312
209424_s_at	AMACR	1.53	0.0409
209286_at	CDC42EP3	1.53	0.0128
222701_s_at	CHCHD7	1.53	0.0253
213620_s_at	ICAM2	1.53	5.03e-05
201088_at	KPNA2	1.53	0.0505
1560974_s_at	NOS1	1.53	0.0057
203896_s_at	PLCB4	1.53	0.0775
1552509_a_at	CD300LG	1.52	0.0918
228501_at	GALNT15	1.52	0.0882
227006_at	PPP1R14A	1.52	0.0414
221989_at	RPL10	1.52	0.0108
228325_at	SPIDR	1.52	0.0122
224900_at	ANKFY1	1.51	0.0297
1562391_at	B3GALNT2	1.51	0.0128
239249_at	BCL6	1.51	0.0886
238062_at	GPIHBP1	1.51	0.0266
230880_at	KIAA1652	1.51	0.0935
216237_s_at	MCM5	1.51	0.0202
214437_s_at	SHMT2	1.51	0.0708
232864_s_at	AFF4	1.5	0.0076
228434_at	BTNL9	1.5	0.0683
213798_s_at	CAP1	1.5	0.0092
204363_at	F3	1.5	0.034
225262_at	FOSL2	1.5	0.0039
224885_s_at	KRTCAP2	1.5	0.0038
224476_s_at	MESP1	1.5	0.0005
219067_s_at	NSMCE4A	1.5	0.0359
202426_s_at	RXRA	1.5	0.0215
233587_s_at	SIPA1L2	1.5	0.0868
229513_at	STRBP	1.5	0.0307
204143_s_at	ENOSF1	1.49	0.0222
235014_at	ILF3-AS1	1.49	0.0223
228067_at	KIAA1211L	1.49	0.0342
235382_at	LVRN	1.49	0.026
223272_s_at	NTPCR	1.49	0.0034
205372_at	PLAG1	1.49	0.0727
202430_s_at	PLSCR1	1.49	0.0272
201859_at	SRGN	1.49	0.0021
205883_at	ZBTB16	1.49	0.0346
206612_at	CACNG1	1.48	0.0167
209005_at	FBXL5	1.48	0.0014
204805_s_at	H1FX	1.48	0.0048
226333_at	IL6R	1.48	0.0462
218014_at	NUP85	1.48	0.0045
227359_at	OSCP1	1.48	0.0423
203660_s_at	PCNT	1.48	0.0567
211730_s_at	POLR2L	1.48	0.0778
228174_at	SCAI	1.48	0.0258
225143_at	SFXN4	1.48	0.007
1552732_at	ABRA	1.47	0.0604
209614_at	ADH1B	1.47	0.0444
1556599_s_at	ARPP21	1.47	0.0337
209301_at	CA2	1.47	0.0894
224657_at	ERRFI1	1.47	0.0212
201466_s_at	JUN	1.47	0.0021
232088_x_at	LINC00899	1.47	0.0792
202671_s_at	PDXK	1.47	0.0974
225526_at	MKLN1	1.47	0.0307
217165_x_at	MT1F	1.47	0.0289
225080_at	MYO1C	1.47	0.0057
218294_s_at	NUP50	1.47	0.0136
209149_s_at	TM9SF1	1.47	0.025
224944_at	TMPO	1.47	0.0621
222606_at	ZWILCH	1.47	0.0107
225486_at	ARID2	1.46	0.0035
237003_at	BEST3	1.46	0.032
234942_s_at	DNTTIP1	1.46	0.0589
219298_at	ECHDC3	1.46	0.0909
214093_s_at	FUBP1	1.46	0.006
229377_at	GRTP1	1.46	0.0258
200824_at	GSTP1	1.46	0.0457
1557246_at	KIDINS220	1.46	0.0604
211456_x_at	MT1HL1	1.46	0.0865
208982_at	PECAM1	1.46	0.0246
1565639_a_at	PMP22	1.46	0.0802
201589_at	SMC1A	1.46	0.0415
228132_at	ABLIM2	1.45	0.055
1561079_at	ANKRD28	1.45	0.0632
205146_x_at	APBA3	1.45	0.0009
1558953_s_at	CEP164	1.45	0.0384
206710_s_at	EPB41L3	1.45	0.0305
200799_at	HSPA1A	1.45	0.0163
201751_at	JOSD1	1.45	0.0016
226039_at	MGAT4A	1.45	0.0318
229835_s_at	PRELID3B	1.45	0.0611
202251_at	PRPF3	1.45	0.0007
225120_at	PURB	1.45	0.0303
204916_at	RAMP1	1.45	0.0343
228461_at	SH3RF3	1.45	0.0792
212085_at	SLC25A6	1.45	0.0472
203721_s_at	UTP18	1.45	0.0683
209380_s_at	ABCC5	1.44	0.0338
1552731_at	ABRA	1.44	0.0655
218795_at	ACP6	1.44	0.0885
203645_s_at	CD163	1.44	0.0778
202177_at	GAS6	1.44	0.0076
228647_at	LOC100049716	1.44	0.0454
225035_x_at	LOC100288778	1.44	0.0154
216336_x_at	MT1E	1.44	0.0257
216115_at	NF1	1.44	0.009
218543_s_at	PARP12	1.44	0.0234
221768_at	SFPQ	1.44	0.0031
230748_at	SLC16A6	1.44	0.0364
226465_s_at	SON	1.44	0.0069
208673_s_at	SRSF3	1.44	0.0261
221514_at	UTP14A	1.44	0.0169
209461_x_at	WDR18	1.44	0.0058
203571_s_at	ADIRF	1.43	0.0973
227942_s_at	CRIPT	1.43	0.0736
211501_s_at	EIF3B	1.43	0.0015
236314_at	EPM2AIP1	1.43	0.0484
204948_s_at	FST	1.43	0.0776
208812_x_at	HLA-C	1.43	0.0031
213817_at	IRAK3	1.43	0.032
224606_at	KLF6	1.43	0.0559
218522_s_at	MAP1S	1.43	0.0129
218440_at	MCCC1	1.43	0.0931
207717_s_at	PKP2	1.43	0.0668
209681_at	SLC19A2	1.43	0.0754
219090_at	SLC24A3	1.43	0.0853
218750_at	TAF1D	1.43	0.0228
203701_s_at	TRMT1	1.43	0.0292
224785_at	UBALD2	1.43	0.0442
226605_at	DGKQ	1.42	0.0867
222164_at	FGFR1	1.42	0.002
201505_at	LAMB1	1.42	0.0632
204125_at	NDUFAF1	1.42	0.0008
210139_s_at	PMP22	1.42	0.0875
232500_at	RALGAPA2	1.42	0.0364
201845_s_at	RYBP	1.42	0.0447
229650_s_at	SMIM7	1.42	0.0276
226176_s_at	USP42	1.42	0.014
219134_at	ADGRL4	1.41	0.0484
215148_s_at	APBA3	1.41	0.0002
225557_at	CSRNP1	1.41	0.0024
211991_s_at	HLA-DPA1	1.41	0.0196
210095_s_at	IGFBP3	1.41	0.0875
224571_at	IRF2BP2	1.41	0.0192
1555363_s_at	LINC00663	1.41	0.0394
1556114_a_at	LOC101928841	1.41	0.072
1556113_at	LOC101928841	1.41	0.0194
206243_at	TIMP4	1.41	0.0063
1558700_s_at	ZNF260	1.41	0.0299
1555736_a_at	AGTRAP	1.4	0.0016
227378_x_at	C16orf13	1.4	0.0018
218148_at	CENPT	1.4	0.0148
204264_at	CPT2	1.4	0.0163
243020_at	FAM13A-AS1	1.4	0.0386
239082_at	FZD3	1.4	0.0117
224835_at	GPCPD1	1.4	0.0663
228680_at	KIF3A	1.4	0.0153
244116_at	LOC101927391	1.4	0.0505
212037_at	PNN	1.4	0.0288
225973_at	TAP2	1.4	0.0384
43977_at	TMEM161A	1.4	0.0412
204340_at	TMEM187	1.4	0.0547
203432_at	TMPO	1.4	0.0066
228393_s_at	ZNF302	1.4	0.0185
238987_at	B4GALT1	1.39	0.0171
210243_s_at	B4GALT3	1.39	0.0269
218220_at	C12orf10	1.39	0.0661
218178_s_at	CHMP1B	1.39	0.0963
205944_s_at	CLTCL1	1.39	0.0065
823_at	CX3CL1	1.39	0.0004
219001_s_at	DCAF10	1.39	0.0602
227188_at	EVA1C	1.39	0.0058
212596_s_at	HMGXB4	1.39	0.0067
208436_s_at	IRF7	1.39	0.0176
1557067_s_at	LUC7L	1.39	0.0406
232568_at	MGC24103	1.39	0.0201
236573_at	MIR133A1HG	1.39	0.028
225719_s_at	MRPL55	1.39	0.0044
226813_at	NTPCR	1.39	0.0437
204021_s_at	PURA	1.39	0.0458
222982_x_at	SLC38A2	1.39	0.0891
201664_at	SMC4	1.39	0.0534
222627_at	VPS54	1.39	0.0002
242981_at	ZSCAN25	1.39	0.0562
210404_x_at	CAMK2B	1.38	0.049
227094_at	DHTKD1	1.38	0.0849
219718_at	FGGY	1.38	0.001
208960_s_at	KLF6	1.38	0.0996
236836_at	LOC105379045	1.38	0.0409
224535_s_at	MRPL57	1.38	0.058
206461_x_at	MT1H	1.38	0.0675
218189_s_at	NANS	1.38	0.0274
211570_s_at	RAPSN	1.38	0.0043
204178_s_at	RBM14	1.38	0.0091
225310_at	RBMX	1.38	0.0327
200003_s_at	RPL28	1.38	0.0266
209003_at	SLC25A11	1.38	0.0237
212110_at	SLC39A14	1.38	0.0272
1565703_at	SMAD4	1.38	0.08
204955_at	SRPX	1.38	0.0671
226712_at	SSR1	1.38	0.0944
201836_s_at	SUPT7L	1.38	0.0998
204526_s_at	TBC1D8	1.38	0.0607
202477_s_at	TUBGCP2	1.38	0.0004
219635_at	ZNF606	1.38	0.0443
217757_at	A2M	1.37	0.0145
203865_s_at	ADARB1	1.37	0.0707
205706_s_at	ANKRD26	1.37	0.0262
212159_x_at	AP2A2	1.37	0.0005
211483_x_at	CAMK2B	1.37	0.0233
225017_at	CCDC14	1.37	0.0317
218508_at	DCP1A	1.37	0.0311
200005_at	EIF3D	1.37	0.0233
204224_s_at	GCH1	1.37	0.0133
215313_x_at	HLA-A	1.37	0.0326
208668_x_at	HMGN2	1.37	0.0569
203595_s_at	IFIT5	1.37	0.0365
232762_at	KIAA1217	1.37	0.0357
43544_at	MED16	1.37	0.0588
221899_at	N4BP2L2	1.37	0.0805
229422_at	NRDC	1.37	0.0715
212542_s_at	PHIP	1.37	0.0422
227698_s_at	RAB40C	1.37	0.0463
219957_at	RUFY2	1.37	0.0132
201463_s_at	TALDO1	1.37	0.0489
1552287_s_at	AFG3L1P	1.36	0.0035
219966_x_at	BANP	1.36	0.0119
1555411_a_at	CCNL1	1.36	0.0465
213006_at	CEBPD	1.36	0.0056
223513_at	CENPJ	1.36	0.0104
203462_x_at	EIF3B	1.36	0.006
227755_at	ERN1	1.36	0.0673
202942_at	ETFB	1.36	0.0152
225922_at	FNIP2	1.36	0.0837
212847_at	FUBP1	1.36	0.0217
213737_x_at	GOLGA8N	1.36	0.0007
201508_at	IGFBP4	1.36	0.0887
209184_s_at	IRS2	1.36	0.0905
204663_at	ME3	1.36	0.0034
51176_at	MED27	1.36	0.0145
242512_at	MYO9A	1.36	0.0376
202340_x_at	NR4A1	1.36	0.0589
244811_at	PHIP	1.36	0.0244
212032_s_at	PTOV1	1.36	0.0182
208070_s_at	REV3L	1.36	0.0558
230443_at	SNU13	1.36	0.0004
228214_at	SOX6	1.36	0.0147
218745_x_at	TMEM161A	1.36	0.0463
211168_s_at	UPF1	1.36	0.0019
224562_at	WASF2	1.36	0.0192
224796_at	ASAP1	1.35	0.0035
206016_at	CCDC22	1.35	0.0198
211038_s_at	CROCCP2	1.35	0.0765
238053_at	DHRSX	1.35	0.0378
211623_s_at	FBL	1.35	0.0029
209892_at	FUT4	1.35	0.0052
223572_at	HHATL	1.35	0.0008
219354_at	KLHL26	1.35	0.0103
211651_s_at	LAMB1	1.35	0.098
34764_at	LARS2	1.35	0.0002
225066_at	PPP2R2D	1.35	0.0098
225724_at	PSMA3-AS1	1.35	0.0139
218371_s_at	PSPC1	1.35	0.0244
201394_s_at	RBM5	1.35	0.0151
56256_at	SIDT2	1.35	0.0565
222469_s_at	TOLLIP	1.35	0.0004
206068_s_at	ACADL	1.34	0.0639
208636_at	ACTN1	1.34	0.0687
228151_at	ARL15	1.34	0.0053
207809_s_at	ATP6AP1	1.34	0.0557
218565_at	C9orf114	1.34	0.0026
209956_s_at	CAMK2B	1.34	0.0923
225644_at	CCDC117	1.34	0.0489
225523_at	CCDC142	1.34	0.0098
228999_at	CHD2	1.34	0.009
225772_s_at	COX14	1.34	0.0143
205976_at	FASTKD2	1.34	0.0474
201948_at	GNL2	1.34	0.0411
231821_x_at	GTF2IP20	1.34	0.0253
209140_x_at	HLA-B	1.34	0.0094
205258_at	INHBB	1.34	0.0031
224570_s_at	IRF2BP2	1.34	0.0686
219371_s_at	KLF2	1.34	0.0261
213526_s_at	LIN37	1.34	0.0047
242273_at	LLPH	1.34	0.0409
223528_s_at	METTL17	1.34	0.0201
217546_at	MT1M	1.34	0.0339
225626_at	PAG1	1.34	0.0437
204134_at	PDE2A	1.34	0.0034
203782_s_at	POLRMT	1.34	0.0258
222443_s_at	RBM8A	1.34	0.0154
214016_s_at	SFPQ	1.34	0.0005
213843_x_at	SLC6A8	1.34	0.0231
227498_at	SOX6	1.34	0.0908
202307_s_at	TAP1	1.34	0.083
204468_s_at	TIE1	1.34	0.0778
1553099_at	TIGD1	1.34	0.0497
239283_at	TMED5	1.34	0.0663
225605_at	TP53I13	1.34	0.0357
205437_at	ZNF211	1.34	0.0909
211779_x_at	AP2A2	1.33	0.0182
203522_at	CCS	1.33	0.0038
235919_at	CEP78	1.33	0.0871
218642_s_at	CHCHD7	1.33	0.0518
204050_s_at	CLTA	1.33	0.0087
226751_at	CNRIP1	1.33	0.0286
202224_at	CRK	1.33	0.036
228106_at	DCAF16	1.33	0.069
225290_at	ETNK1	1.33	0.0803
209074_s_at	FAM107A	1.33	0.0066
224632_at	GPATCH4	1.33	0.0766
243907_at	GREB1L	1.33	0.0808
240452_at	GSPT1	1.33	0.0965
223211_at	HACL1	1.33	0.0378
208729_x_at	HLA-B	1.33	0.0394
211990_at	HLA-DPA1	1.33	0.0277
217362_x_at	HLA-DRB6	1.33	0.0362
40569_at	MZF1	1.33	0.0295
226707_at	NAPRT	1.33	0.0534
220035_at	NUP210	1.33	0.019
232521_at	PCSK7	1.33	0.0096
203537_at	PRPSAP2	1.33	0.0462
239329_at	RAB21	1.33	0.0936
1553422_s_at	RBFOX1	1.33	0.0086
225776_at	RBMS2	1.33	0.0321
212647_at	RRAS	1.33	0.0847
222310_at	SCAF4	1.33	0.0906
223276_at	SMIM3	1.33	0.0248
226278_at	SVIP	1.33	0.0268
219315_s_at	TMEM204	1.33	0.0027
1554485_s_at	TMEM37	1.33	0.0713
222840_at	ATG2B	1.32	0.0341
217767_at	C3	1.32	0.0657
210766_s_at	CSE1L	1.32	0.0163
217901_at	DSG2	1.32	0.0141
228339_at	ECSCR	1.32	0.0419
209059_s_at	EDF1	1.32	0.0048
223637_s_at	FAM160A2	1.32	5.08e-05
218880_at	FOSL2	1.32	0.0358
227524_at	FZD3	1.32	0.0218
40225_at	GAK	1.32	0.0242
224826_at	GPCPD1	1.32	0.0669
226840_at	H2AFY	1.32	0.0039
210428_s_at	HGS	1.32	0.009
201315_x_at	IFITM2	1.32	0.0258
202220_at	KIAA0907	1.32	0.0864
221838_at	KLHL22	1.32	0.0104
222759_at	KMT5B	1.32	0.0056
1557816_a_at	LOC105379186	1.32	0.0942
226631_at	METTL10	1.32	0.0104
219091_s_at	MMRN2	1.32	0.0031
202380_s_at	NKTR	1.32	0.0324
202466_at	PAPD7	1.32	0.0108
238788_at	PHBP19	1.32	0.0718
212239_at	PIK3R1	1.32	0.0404
205273_s_at	PITRM1	1.32	0.0105
202732_at	PKIG	1.32	0.0386
217786_at	PRMT5	1.32	0.0871
223797_at	PRO2852	1.32	0.0617
202408_s_at	PRPF31	1.32	0.0202
53987_at	RANBP10	1.32	0.0422
208984_x_at	RBM10	1.32	0.021
226164_x_at	RIMKLB	1.32	0.0398
218598_at	RINT1	1.32	0.0859
238949_at	RNF145	1.32	0.0709
217946_s_at	SAE1	1.32	0.0077
227210_at	SFMBT2	1.32	0.0763
203580_s_at	SLC7A6	1.32	0.0866
226600_at	TMTC3	1.32	0.0398
218766_s_at	WARS2	1.32	0.0733
204523_at	ZNF140	1.32	0.0047
232436_at	ZNF274	1.32	0.0246
208335_s_at	ACKR1	1.31	0.0592
225625_at	ALKBH2	1.31	0.0014
225754_at	AP1G1	1.31	0.0019
223024_at	AP1M1	1.31	0.0581
201641_at	BST2	1.31	0.097
227004_at	CDKL5	1.31	0.0044
242585_at	CKMT2-AS1	1.31	0.0536
242287_at	CLIP1	1.31	0.0422
226000_at	CTTNBP2NL	1.31	0.054
229813_x_at	DAZAP1	1.31	0.0368
202802_at	DHPS	1.31	0.0257
212504_at	DIP2C	1.31	0.0965
200880_at	DNAJA1	1.31	0.0415
227166_at	DNAJC18	1.31	0.0638
212026_s_at	EXOC7	1.31	0.0044
221766_s_at	FAM46A	1.31	0.0816
202812_at	GAA	1.31	0.0051
223811_s_at	GET4	1.31	0.0016
211997_x_at	H3F3B	1.31	0.0667
200943_at	HMGN1	1.31	0.0925
214280_x_at	HNRNPA1	1.31	0.0073
200052_s_at	ILF2	1.31	0.042
213089_at	LOC100272216	1.31	0.0147
208078_s_at	SIK1	1.31	0.0829
230815_at	LOC389765	1.31	0.0482
213178_s_at	MAPK8IP3	1.31	0.0766
213629_x_at	MT1F	1.31	0.0796
206657_s_at	MYOD1	1.31	0.0671
235410_at	NPHP3	1.31	0.0273
204766_s_at	NUDT1	1.31	0.0045
215374_at	PAPOLA	1.31	0.0491
219155_at	PITPNC1	1.31	0.0107
225901_at	PTPMT1	1.31	0.0214
212168_at	RBM12	1.31	0.0258
201258_at	RPS16	1.31	0.0099
1555618_s_at	SAE1	1.31	0.0954
232652_x_at	SCAND1	1.31	0.0422
221769_at	SPSB3	1.31	0.0102
223455_at	TCHP	1.31	0.0149
222744_s_at	TMLHE	1.31	0.066
218940_at	VCPKMT	1.31	0.0525
222688_at	ACER3	1.3	0.0304
226421_at	AMMECR1	1.3	0.0134
219081_at	ANKHD1	1.3	0.0138
205068_s_at	ARHGAP26	1.3	0.01
1553978_at	BORCS8	1.3	0.022
1554466_a_at	C16orf13	1.3	0.0784
204085_s_at	CLN5	1.3	0.0906
206441_s_at	COMMD4	1.3	0.0064
1555274_a_at	EPT1	1.3	0.0285
218448_at	GID8	1.3	0.0271
221521_s_at	GINS2	1.3	0.0802
226429_at	GPALPP1	1.3	0.0564
213170_at	GPX7	1.3	0.0202
235863_at	JSRP1	1.3	0.0314
212162_at	KIDINS220	1.3	0.0807
228245_s_at	OVOS2	1.3	0.0394
201186_at	LRPAP1	1.3	0.0537
1560145_at	MKLN1	1.3	0.0129
224334_s_at	MRPL51	1.3	0.039
202757_at	NELFB	1.3	0.0209
202216_x_at	NFYC	1.3	0.0716
216263_s_at	NGDN	1.3	0.0006
225431_x_at	PM20D2	1.3	0.063
242055_at	PSMG4	1.3	0.0439
203573_s_at	RABGGTA	1.3	0.0058
238026_at	RPL35A	1.3	0.0386
219762_s_at	RPL36	1.3	0.0154
207585_s_at	RPL36AL	1.3	0.0089
210432_s_at	SCN3A	1.3	0.006
223538_at	SERF1A	1.3	0.0863
205367_at	SH2B2	1.3	0.0814
226743_at	SLFN11	1.3	0.0308
232931_at	SNRNP200	1.3	0.0604
219993_at	SOX17	1.3	0.0223
219677_at	SPSB1	1.3	0.0863
46256_at	SPSB3	1.3	0.0683
201061_s_at	STOM	1.3	0.0023
202260_s_at	STXBP1	1.3	0.0234
224913_s_at	TIMM50	1.3	0.071
223113_at	TMEM138	1.3	0.072
227063_at	TMEM256	1.3	0.0023
219632_s_at	TRPV1	1.3	0.0858
215111_s_at	TSC22D1	1.3	0.025
225964_at	ZXDC	1.3	0.0962
202366_at	ACADS	1.29	0.0365
227213_at	ADAT2	1.29	0.0547
223333_s_at	ANGPTL4	1.29	0.0632
206200_s_at	ANXA11	1.29	0.0232
1557116_at	APOL6	1.29	0.0393
220597_s_at	ARL6IP4	1.29	0.0695
233186_s_at	BANP	1.29	0.0314
235526_at	C11orf58	1.29	0.0595
226032_at	CASP2	1.29	0.0143
201700_at	CCND3	1.29	0.0029
221427_s_at	CCNL2	1.29	0.0982
219294_at	CENPQ	1.29	0.0211
235443_at	CKMT2-AS1	1.29	0.0003
209132_s_at	COMMD4	1.29	0.0448
221139_s_at	CSAD	1.29	0.0849
214198_s_at	DGCR2	1.29	0.0042
201530_x_at	EIF4A1	1.29	0.0503
223255_at	G2E3	1.29	0.035
224741_x_at	GAS5	1.29	0.0881
217782_s_at	GPS1	1.29	0.0317
212212_s_at	INTS1	1.29	0.0089
225642_at	KTI12	1.29	0.0405
219884_at	LHX6	1.29	0.0367
241803_s_at	LOC100240735	1.29	0.0709
233929_x_at	LOC100288778	1.29	0.0314
225315_at	MRPL21	1.29	0.0064
204745_x_at	MT1G	1.29	0.0734
236384_at	NCBP3	1.29	0.0868
218697_at	NCKIPSD	1.29	0.0348
218563_at	NDUFA3	1.29	0.0101
217830_s_at	NSFL1C	1.29	0.0368
239948_at	NUP153	1.29	0.0824
233029_at	OBSCN	1.29	0.0964
221604_s_at	PEX16	1.29	0.0242
230699_at	PGLS	1.29	0.0137
214224_s_at	PIN4	1.29	0.0123
232312_at	PPP6R3	1.29	0.0829
210051_at	RAPGEF3	1.29	0.0028
221578_at	RASSF4	1.29	0.0866
238122_at	RBM12B	1.29	0.0157
209497_s_at	RBM4B	1.29	0.0887
204097_s_at	RBMX2	1.29	0.0007
220788_s_at	RNF31	1.29	0.0476
218370_s_at	S100PBP	1.29	0.0478
218033_s_at	SNN	1.29	0.0941
209820_s_at	TBL3	1.29	0.0208
221952_x_at	TRMT5	1.29	0.0875
209605_at	TST	1.29	0.0463
230656_s_at	UTP4	1.29	0.0103
242255_at	WDR37	1.29	0.0763
225318_at	WHSC1L1	1.29	0.0578
228920_at	ZNF260	1.29	0.0286
218064_s_at	AKAP8L	1.28	0.075
223251_s_at	ANKRD10	1.28	0.0806
238332_at	ANKRD29	1.28	0.0061
202592_at	BLOC1S1	1.28	0.0425
224719_s_at	C12orf57	1.28	0.0036
225484_at	CEP41	1.28	0.0862
203166_at	CFDP1	1.28	0.0042
235791_x_at	CHD1	1.28	0.0632
223020_at	CLPTM1L	1.28	0.0145
208817_at	COMT	1.28	0.0149
200661_at	CTSA	1.28	0.0461
226620_x_at	DAZAP1	1.28	0.0212
64474_g_at	DGCR8	1.28	0.0252
218325_s_at	DIDO1	1.28	0.0182
208688_x_at	EIF3B	1.28	0.0128
208438_s_at	FGR	1.28	0.012
50277_at	GGA1	1.28	0.0382
239896_at	GS1-124K5.4	1.28	0.042
235902_at	HERC2P7	1.28	0.0151
218192_at	IP6K2	1.28	0.0641
209661_at	KIFC3	1.28	0.0511
203419_at	KMT2B	1.28	0.0014
206822_s_at	L3MBTL1	1.28	0.0216
227013_at	LATS2	1.28	0.0788
209017_s_at	LONP1	1.28	0.0246
222464_s_at	MCMBP	1.28	0.048
226300_at	MED19	1.28	0.021
204880_at	MGMT	1.28	0.0667
236262_at	MMRN2	1.28	0.0463
212185_x_at	MT2A	1.28	0.061
212347_x_at	MXD4	1.28	0.0012
201757_at	NDUFS5	1.28	0.0033
217526_at	NFATC2IP	1.28	0.0352
200875_s_at	NOP56	1.28	0.0637
210028_s_at	ORC3	1.28	0.0574
223220_s_at	PARP9	1.28	0.058
202886_s_at	PPP2R1B	1.28	0.0146
221547_at	PRPF18	1.28	0.0058
202189_x_at	PTBP1	1.28	0.0288
216306_x_at	PTBP1	1.28	0.0083
211270_x_at	PTBP1	1.28	0.0033
203696_s_at	RFC2	1.28	0.0042
239142_at	RFESD	1.28	0.0362
218007_s_at	RPS27L	1.28	0.0341
210010_s_at	SLC25A1	1.28	0.0151
206874_s_at	SLK	1.28	0.0871
200911_s_at	TACC1	1.28	0.0208
221495_s_at	TCF25	1.28	0.0157
203235_at	THOP1	1.28	0.0197
209263_x_at	TSPAN4	1.28	0.012
203241_at	UVRAG	1.28	0.0269
219322_s_at	WRAP73	1.28	0.0617
219062_s_at	ZCCHC2	1.28	0.0795
236243_at	ZCCHC6	1.28	0.021
225076_s_at	ZNFX1	1.28	7.39e-05
223376_s_at	BRI3	1.27	0.01
200625_s_at	CAP1	1.27	0.0517
222999_s_at	CCNL2	1.27	0.016
242394_at	CNKSR3	1.27	0.0866
225595_at	CREBZF	1.27	0.0699
202332_at	CSNK1E	1.27	0.0125
209429_x_at	EIF2B4	1.27	0.0057
201727_s_at	ELAVL1	1.27	0.0288
218938_at	FBXL15	1.27	0.0616
221922_at	GPSM2	1.27	0.0996
222405_at	HACD3	1.27	0.0113
211799_x_at	HLA-C	1.27	0.0315
209823_x_at	HLA-DQB1	1.27	0.0029
225932_s_at	HNRNPA2B1	1.27	0.0864
203089_s_at	HTRA2	1.27	0.0047
222519_s_at	IFT57	1.27	0.0945
1553111_a_at	KBTBD6	1.27	0.0375
212795_at	KIAA1033	1.27	0.0997
236886_at	LOC100049716	1.27	0.0107
216110_x_at	LOC105373738	1.27	0.0798
208795_s_at	MCM7	1.27	0.0248
223849_s_at	MOV10	1.27	0.0185
217527_s_at	NFATC2IP	1.27	0.0276
224938_at	NUFIP2	1.27	0.0704
225136_at	PLEKHA2	1.27	0.0178
210502_s_at	PPIE	1.27	0.0435
229001_at	PPP1R3E	1.27	0.0428
202883_s_at	PPP2R1B	1.27	0.0231
216088_s_at	PSMA7	1.27	0.0089
200833_s_at	RAP1B	1.27	0.0443
225929_s_at	RNF213	1.27	0.0535
200834_s_at	RPS21	1.27	0.0595
33307_at	RRP7A	1.27	0.0686
217965_s_at	SAP30BP	1.27	0.0248
203455_s_at	SAT1	1.27	0.0292
224959_at	SLC26A2	1.27	0.0635
224717_s_at	SMIM7	1.27	0.0113
225636_at	STAT2	1.27	0.0053
201079_at	SYNGR2	1.27	0.0959
226625_at	TGFBR3	1.27	0.0879
225462_at	TMEM128	1.27	0.0834
201379_s_at	TPD52L2	1.27	0.0035
217774_s_at	TRMT112	1.27	0.0496
213243_at	VPS13B	1.27	0.0278
202418_at	YIF1A	1.27	0.0775
213353_at	ABCA5	1.26	0.0945
1552615_at	ACACB	1.26	0.0444
221569_at	AHI1	1.26	0.0359
221087_s_at	APOL3	1.26	0.06
211975_at	ARFGAP2	1.26	0.0653
227173_s_at	BACH2	1.26	0.0568
201032_at	BLCAP	1.26	0.0987
218004_at	BSDC1	1.26	0.0336
204193_at	CHKB	1.26	0.0537
223219_s_at	CNOT10	1.26	0.018
36566_at	CTNS	1.26	0.0833
225637_at	DEF8	1.26	0.0191
224814_at	DPP7	1.26	0.0097
202909_at	EPM2AIP1	1.26	0.0275
203358_s_at	EZH2	1.26	0.0671
204283_at	FARS2	1.26	0.0214
226398_s_at	FRA10AC1	1.26	0.0627
235413_at	GGCX	1.26	0.0132
228068_at	GOLGA7B	1.26	0.0143
219863_at	HERC5	1.26	0.0229
202411_at	IFI27	1.26	0.0388
203087_s_at	KIF2A	1.26	0.0824
201553_s_at	LAMP1	1.26	0.0162
202020_s_at	LANCL1	1.26	0.0497
1554456_a_at	LINS1	1.26	0.054
224763_at	RPL37	1.26	0.0824
1560014_s_at	PDXDC1	1.26	0.0741
200772_x_at	PTMA	1.26	0.066
209087_x_at	MCAM	1.26	0.0765
203062_s_at	MDC1	1.26	0.0131
1569484_s_at	MDN1	1.26	0.0412
223988_x_at	METTL17	1.26	0.0271
200899_s_at	MGEA5	1.26	0.066
217977_at	MSRB1	1.26	0.086
223348_x_at	MUM1	1.26	0.0043
204527_at	MYO5A	1.26	0.0473
235432_at	NPHP3	1.26	0.0568
204435_at	NUP58	1.26	0.0466
218708_at	NXT1	1.26	0.0191
209240_at	OGT	1.26	0.0395
225251_at	RAB24	1.26	0.0213
217301_x_at	RBBP4	1.26	0.0277
215089_s_at	RBM10	1.26	0.0258
201543_s_at	SAR1A	1.26	0.0043
236027_at	SFR1	1.26	0.0264
216599_x_at	SLC22A6	1.26	0.0565
224609_at	SLC44A2	1.26	0.0198
236016_at	SMARCE1	1.26	0.0555
207436_x_at	SORBS1	1.26	0.0872
200085_s_at	TCEB2	1.26	0.0026
218345_at	TMEM176A	1.26	0.0883
215411_s_at	TRAF3IP2	1.26	0.0453
1560698_a_at	TRHDE-AS1	1.26	0.0359
202112_at	VWF	1.26	0.0161
225995_x_at	WASH1	1.26	0.0343
218911_at	YEATS4	1.26	0.0439
205434_s_at	AAK1	1.25	0.0328
225621_at	ALG2	1.25	0.0498
208839_s_at	CAND1	1.25	0.0395
217849_s_at	CDC42BPB	1.25	0.0242
223679_at	CTNNB1	1.25	0.0188
211558_s_at	DHPS	1.25	0.0563
210469_at	DLG5	1.25	0.0453
225329_at	FAM195B	1.25	0.0128
225376_at	GID8	1.25	0.0997
226868_at	GXYLT1	1.25	0.0144
228621_at	HFE2	1.25	0.0792
214459_x_at	HLA-C	1.25	0.0038
211529_x_at	HLA-G	1.25	0.0366
211929_at	HNRNPA3	1.25	0.099
212203_x_at	IFITM3	1.25	0.0768
206999_at	IL12RB2	1.25	0.0844
209336_at	PWP2	1.25	0.0044
211340_s_at	MCAM	1.25	0.0688
222867_s_at	MED31	1.25	0.0706
210605_s_at	MFGE8	1.25	0.0141
203037_s_at	MTSS1	1.25	0.054
208926_at	NEU1	1.25	0.0172
210097_s_at	NOL7	1.25	0.0598
211951_at	NOLC1	1.25	0.0121
226992_at	NOSTRIN	1.25	0.0844
210574_s_at	NUDC	1.25	0.0166
231914_at	NUDT14	1.25	0.0119
212181_s_at	NUDT4	1.25	0.0068
213947_s_at	NUP210	1.25	0.0021
212015_x_at	PTBP1	1.25	0.0048
209695_at	PTP4A3	1.25	0.0932
217221_x_at	RBM10	1.25	0.0675
231765_at	RBSN	1.25	0.0888
202297_s_at	RER1	1.25	0.0684
227983_at	RILPL2	1.25	0.0829
215696_s_at	SEC16A	1.25	0.0227
209352_s_at	SIN3B	1.25	0.041
1554161_at	SLC25A27	1.25	0.0807
227648_at	SMDT1	1.25	0.0449
1556185_a_at	STEAP4	1.25	0.0342
242290_at	TACC1	1.25	0.0737
218466_at	TBC1D17	1.25	0.0715
233430_at	TBC1D22B	1.25	0.0889
213346_at	TEX30	1.25	0.0907
210379_s_at	TLK1	1.25	0.0784
228279_s_at	TNK2	1.25	0.0019
210463_x_at	TRMT1	1.25	0.0265
231904_at	U2AF1	1.25	0.0098
232633_at	XRCC5	1.25	0.0429
1556060_a_at	ZNF451	1.25	0.0422
203624_at	AKAP17A	1.24	0.0065
223532_at	ANKRD23	1.24	0.0475
213039_at	ARHGEF18	1.24	0.0128
210649_s_at	ARID1A	1.24	0.092
213300_at	ATG2A	1.24	0.0266
203773_x_at	BLVRA	1.24	0.066
209430_at	BTAF1	1.24	0.0331
201458_s_at	BUB3	1.24	0.0247
225353_s_at	C1QC	1.24	0.083
238015_at	C4orf46	1.24	0.0922
204275_at	CAPN15	1.24	0.0389
225454_at	CCDC124	1.24	0.0148
228519_x_at	CIRBP	1.24	0.0546
216295_s_at	CLTA	1.24	0.0419
204263_s_at	CPT2	1.24	0.0991
207030_s_at	CSRP2	1.24	0.0556
227109_at	CYP2R1	1.24	0.0863
220643_s_at	FAIM	1.24	0.0142
221984_s_at	FAM134A	1.24	0.093
203262_s_at	FAM50A	1.24	0.0594
209630_s_at	FBXW2	1.24	0.0197
223950_s_at	FLYWCH1	1.24	0.0784
209414_at	FZR1	1.24	0.0071
222140_s_at	GPR89A	1.24	0.0696
209069_s_at	H3F3B	1.24	0.0462
212115_at	HN1L	1.24	0.012
223622_s_at	HYI	1.24	0.0209
228946_at	INTU	1.24	0.0556
213474_at	KCTD7	1.24	0.0637
200644_at	MARCKSL1	1.24	0.0549
201173_x_at	NUDC	1.24	0.0078
213682_at	NUP50	1.24	0.0889
213946_s_at	OBSL1	1.24	0.0246
201245_s_at	OTUB1	1.24	0.0978
227033_at	PDIA3	1.24	0.0432
208983_s_at	PECAM1	1.24	0.0485
201050_at	PLD3	1.24	0.0335
226412_at	PNISR	1.24	0.0803
225458_at	SLC9A3	1.24	0.0191
203038_at	PTPRK	1.24	0.0829
219151_s_at	RABL2A	1.24	0.0963
220027_s_at	RASIP1	1.24	0.016
212479_s_at	RMND5A	1.24	0.0636
225541_at	RPL22L1	1.24	0.0497
229871_at	SAMD4B	1.24	0.034
222741_s_at	SAYSD1	1.24	0.0713
201290_at	SEC11A	1.24	0.0789
204019_s_at	SH3YL1	1.24	0.0779
229175_at	SMYD4	1.24	0.0846
229331_at	SPATA18	1.24	0.0608
213594_x_at	SRSF10	1.24	0.0929
213413_at	STON1	1.24	0.0615
202796_at	SYNPO	1.24	0.0361
218492_s_at	THAP7	1.24	0.0271
218491_s_at	THYN1	1.24	0.0637
223628_at	TMEM191A	1.24	0.0217
210654_at	TNFRSF10D	1.24	0.0419
200743_s_at	TPP1	1.24	0.0156
221897_at	TRIM52	1.24	0.017
205546_s_at	TYK2	1.24	0.0312
226652_at	USP3	1.24	0.0107
224903_at	UTP4	1.24	0.0311
203655_at	XRCC1	1.24	0.0637
229899_s_at	ZFAS1	1.24	0.0014
219603_s_at	ZNF226	1.24	0.0437
1557248_at	ZNF814	1.24	0.0789
203981_s_at	ABCD4	1.23	0.0599
231907_at	ABL2	1.23	0.0858
221669_s_at	ACAD8	1.23	0.0442
209320_at	ADCY3	1.23	0.0032
212070_at	ADGRG1	1.23	0.0028
201306_s_at	ANP32B	1.23	0.0791
218527_at	APTX	1.23	0.0456
203952_at	ATF6	1.23	0.0545
218285_s_at	BDH2	1.23	0.0524
223479_s_at	CHCHD5	1.23	0.0344
208818_s_at	COMT	1.23	0.0194
217994_x_at	CPSF3L	1.23	0.0706
212674_s_at	DHX30	1.23	0.0234
1553271_at	DIP2B	1.23	0.023
200881_s_at	DNAJA1	1.23	0.0292
202500_at	DNAJB2	1.23	0.0668
201044_x_at	DUSP1	1.23	0.0838
209058_at	EDF1	1.23	0.0789
209004_s_at	FBXL5	1.23	0.0029
228191_at	FLVCR1	1.23	0.0041
227517_s_at	GAS5	1.23	0.0864
225401_at	GLMP	1.23	0.0638
235264_at	HCFC2	1.23	0.0508
200904_at	HLA-E	1.23	0.0639
221875_x_at	HLA-F	1.23	0.0273
210418_s_at	IDH3B	1.23	0.014
233014_at	IDI1	1.23	0.0311
53968_at	INTS5	1.23	0.0198
219095_at	PLA2G4B	1.23	0.0656
212496_s_at	KDM4B	1.23	0.0139
228291_s_at	KIZ	1.23	0.0775
218018_at	PDXK	1.23	0.0383
203514_at	MAP3K3	1.23	0.0356
218887_at	MRPL2	1.23	0.0067
218001_at	MRPS2	1.23	0.0182
227054_at	N6AMT2	1.23	0.0364
209520_s_at	NCBP1	1.23	0.0217
214084_x_at	NCF1	1.23	0.052
201591_s_at	NISCH	1.23	0.0308
221923_s_at	NPM1	1.23	0.054
223369_at	NTMT1	1.23	0.0665
221579_s_at	NUDT3	1.23	0.0439
214962_s_at	NUP160	1.23	0.0989
235205_at	OXR1	1.23	0.0165
203117_s_at	PAN2	1.23	0.052
228618_at	PEAR1	1.23	0.0422
209345_s_at	PI4K2A	1.23	0.0797
202328_s_at	PKD1	1.23	0.056
200827_at	PLOD1	1.23	0.0199
240349_at	PRKAA2	1.23	0.058
208694_at	PRKDC	1.23	0.0408
211609_x_at	PSMD4	1.23	0.0481
211711_s_at	PTEN	1.23	0.0884
238740_at	PTGES3L	1.23	0.0477
1554095_at	RBM33	1.23	0.0543
238736_at	REV3L	1.23	0.0645
225416_at	RLIM	1.23	0.0437
224972_at	ROMO1	1.23	0.0021
223842_s_at	SCARA3	1.23	0.0571
213370_s_at	SFMBT1	1.23	0.0284
225354_s_at	SH3BGRL2	1.23	0.0097
200657_at	SLC25A5	1.23	0.0226
219175_s_at	SLC41A3	1.23	0.0932
238691_at	SNHG10	1.23	0.0108
233141_s_at	ST7L	1.23	0.0496
230005_at	SVIP	1.23	0.0089
238886_at	TMED10	1.23	0.0326
228671_at	TMEM201	1.23	0.052
202561_at	TNKS	1.23	0.032
213423_x_at	TUSC3	1.23	0.0894
202706_s_at	UMPS	1.23	0.0519
219924_s_at	ZMYM6	1.23	0.0369
227464_at	ACSF3	1.22	0.0446
237336_at	ADD2	1.22	0.0035
212950_at	ADGRF5	1.22	0.0505
215407_s_at	ASTN2	1.22	0.0401
218052_s_at	ATP13A1	1.22	0.0153
218580_x_at	AURKAIP1	1.22	0.0206
225552_x_at	AURKAIP1	1.22	0.0088
202201_at	BLVRB	1.22	0.0711
224574_at	C17orf49	1.22	0.0727
218130_at	C17orf62	1.22	0.0875
223631_s_at	C19orf33	1.22	0.0406
217926_at	C19orf53	1.22	0.0095
232145_at	C2orf68	1.22	0.0591
227840_at	C2orf76	1.22	0.0718
201955_at	CCNC	1.22	0.0698
203468_at	CDK10	1.22	0.0355
226935_s_at	CLPTM1L	1.22	0.073
204577_s_at	CLUAP1	1.22	0.0765
209796_s_at	CNPY2	1.22	0.0553
202329_at	CSK	1.22	0.045
201390_s_at	CSNK2B	1.22	0.0333
225676_s_at	DCAF13	1.22	0.0183
226965_at	DENND6A	1.22	0.0296
202481_at	DHRS3	1.22	0.0655
227199_at	DIP2A	1.22	0.0182
208887_at	EIF3G	1.22	0.0405
213895_at	EMP1	1.22	0.062
218695_at	EXOSC4	1.22	0.0291
218337_at	FAM160B2	1.22	0.0085
218503_at	FOCAD	1.22	0.0521
52159_at	HEMK1	1.22	0.0259
202621_at	IRF3	1.22	0.003
200851_s_at	IST1	1.22	0.0083
238775_at	ITFG1	1.22	0.0683
212495_at	KDM4B	1.22	0.0538
230226_s_at	KDM5A	1.22	0.0659
230616_at	LAMB2P1	1.22	0.077
204016_at	LARS2	1.22	0.0014
202193_at	LIMK2	1.22	0.0167
235322_at	LOC101927151	1.22	0.0064
222017_x_at	LRCH4	1.22	0.0613
227833_s_at	MBD6	1.22	0.0752
218366_x_at	METTL17	1.22	0.0311
1557966_x_at	MTERF4	1.22	0.059
206303_s_at	NUDT4	1.22	0.0822
206550_s_at	NUP155	1.22	0.0005
222273_at	PAPOLG	1.22	0.0568
230408_at	PCGF3	1.22	0.0335
221816_s_at	PHF11	1.22	0.0246
212881_at	PIAS4	1.22	0.0664
209578_s_at	POFUT2	1.22	0.0365
201300_s_at	PRNP	1.22	0.027
217794_at	PRR13	1.22	0.0082
228613_at	RAB11FIP3	1.22	0.0553
223467_at	RASD1	1.22	0.0995
218535_s_at	RIOK2	1.22	0.0744
225190_x_at	RPL35A	1.22	0.0353
208904_s_at	RPS28	1.22	0.0289
214317_x_at	RPS9	1.22	0.0794
217747_s_at	RPS9	1.22	0.0528
226673_at	SH2D3C	1.22	0.0305
229265_at	SKI	1.22	0.0666
229511_at	SMARCE1	1.22	0.0237
214925_s_at	SPTAN1	1.22	0.0622
201680_x_at	SRRT	1.22	0.0486
212799_at	STX6	1.22	0.0544
204690_at	STX8	1.22	0.0497
215356_at	TDRD12	1.22	0.0881
34260_at	TELO2	1.22	0.0446
225198_at	VAPA	1.22	0.0557
235751_s_at	VMO1	1.22	0.0839
233656_s_at	VPS54	1.22	0.0519
219609_at	WDR25	1.22	0.0218
222763_s_at	WDR33	1.22	0.0705
227894_at	WDR90	1.22	0.052
1556314_a_at	ZNF366	1.22	0.0855
228099_at	ZNF550	1.22	0.0814
219849_at	ZNF671	1.22	0.085
214232_at	ABCF2	1.21	0.0206
236087_at	ABLIM2	1.21	0.0549
226334_s_at	AHSA2	1.21	0.0347
208772_at	EIF4EBP3	1.21	0.0422
211566_x_at	BRE	1.21	0.064
228114_x_at	C16orf13	1.21	0.0096
214710_s_at	CCNB1	1.21	0.0064
218572_at	CHMP4A	1.21	0.0815
223198_x_at	COMMD5	1.21	0.0241
1553082_at	CRYGN	1.21	0.0374
228738_at	D2HGDH	1.21	0.0807
208822_s_at	DAP3	1.21	0.043
222595_s_at	DIDO1	1.21	0.0633
222398_s_at	EFTUD2	1.21	0.0314
223083_s_at	EGLN2	1.21	0.0666
206621_s_at	EIF4H	1.21	0.0227
212630_at	EXOC3	1.21	0.0441
215136_s_at	EXOSC8	1.21	0.0694
225704_at	FBRSL1	1.21	0.0723
208614_s_at	FLNB	1.21	0.0413
208473_s_at	GP2	1.21	0.0959
212432_at	GRPEL1	1.21	0.0856
1564525_at	GSN	1.21	0.0744
204806_x_at	HLA-F	1.21	0.0164
202423_at	KAT6A	1.21	0.0683
49329_at	KLHL22	1.21	0.0389
210150_s_at	LAMA5	1.21	0.0052
228387_at	LINC01355	1.21	0.0431
229722_at	LOC100270804	1.21	0.0754
239762_at	LOC286437	1.21	0.0481
211921_x_at	PTMA	1.21	0.0558
239974_at	LOC728095	1.21	0.0224
221740_x_at	LRRC37A2	1.21	0.0884
210092_at	MAGOH	1.21	0.0615
35147_at	MCF2L	1.21	0.0717
218061_at	MEA1	1.21	0.0306
210493_s_at	MFAP3L	1.21	0.0778
210627_s_at	MOGS	1.21	0.0442
203152_at	MRPL40	1.21	0.0936
204386_s_at	MRPL57	1.21	0.0693
206699_x_at	NPAS1	1.21	0.0107
209121_x_at	NR2F2	1.21	0.0905
220176_at	NUBPL	1.21	0.0565
215870_s_at	PLA2G5	1.21	0.0104
203467_at	PMM1	1.21	0.0276
226472_at	PPIL4	1.21	0.0643
37028_at	PPP1R15A	1.21	0.0557
224232_s_at	PRELID1	1.21	0.0235
211084_x_at	PRKD3	1.21	0.0992
228536_at	PRMT9	1.21	0.0108
208880_s_at	PRPF6	1.21	0.0576
204279_at	PSMB9	1.21	0.0429
202296_s_at	RER1	1.21	0.0598
236266_at	RORA	1.21	0.0421
218836_at	RPP21	1.21	0.0781
208742_s_at	SAP18	1.21	0.0649
200069_at	SART3	1.21	0.0386
232597_x_at	SCAF11	1.21	0.0465
200971_s_at	SERP1	1.21	0.0172
204157_s_at	SIK3	1.21	0.0664
218436_at	SIL1	1.21	0.0665
239345_at	SLC19A3	1.21	0.0781
203482_at	SLF2	1.21	0.0585
200058_s_at	SNRNP200	1.21	0.0098
201221_s_at	SNRNP70	1.21	0.0487
205542_at	STEAP1	1.21	0.0776
209463_s_at	TAF12	1.21	0.0273
213090_s_at	TAF4	1.21	0.0627
33778_at	TBC1D22A	1.21	0.0091
213894_at	THSD7A	1.21	0.0263
229983_at	TIGD2	1.21	0.0115
221096_s_at	TMCO6	1.21	0.0816
225675_at	TMEM260	1.21	0.0729
231876_at	TRIM56	1.21	0.0121
1562238_at	USPL1	1.21	0.0405
218679_s_at	VPS28	1.21	0.0672
221725_at	WASF2	1.21	0.0982
242552_x_at	ZBED5	1.21	0.0792
228392_at	ZNF302	1.21	0.088
229000_at	ZNF77	1.21	0.0141
204617_s_at	ACD	1.2	0.0559
200601_at	ACTN4	1.2	0.0621
200615_s_at	AP2B1	1.2	0.0936
1553387_at	ATM	1.2	0.0282
1553376_a_at	AXDND1	1.2	0.0086
228928_x_at	BANP	1.2	0.0246
204167_at	BTD	1.2	0.0796
229679_at	C12orf76	1.2	0.0837
224987_at	C6orf89	1.2	0.0926
239922_at	CCDC142	1.2	0.094
231991_at	CCM2L	1.2	0.09
206327_s_at	CDH15	1.2	0.0285
204136_at	COL7A1	1.2	0.0701
224312_x_at	CPSF3L	1.2	0.0562
233625_x_at	CPSF3L	1.2	0.0226
218986_s_at	DDX60	1.2	0.0788
226116_at	DFFA	1.2	0.0405
207831_x_at	DHPS	1.2	0.0444
218225_at	ECSIT	1.2	0.0981
204096_s_at	ELL	1.2	0.0905
203600_s_at	FAM193A	1.2	0.0255
204768_s_at	FEN1	1.2	0.088
221007_s_at	FIP1L1	1.2	0.0469
200859_x_at	FLNA	1.2	0.0868
232809_s_at	FLT1	1.2	0.0499
212139_at	GCN1	1.2	0.0629
225392_at	GFM2	1.2	0.0253
222251_s_at	GMEB2	1.2	0.0669
216308_x_at	GRHPR	1.2	0.0822
212439_at	IP6K1	1.2	0.0955
200840_at	KARS	1.2	0.0701
237249_at	KCNQ1OT1	1.2	0.062
205978_at	KL	1.2	0.0077
200771_at	LAMC1	1.2	0.0548
213653_at	METTL3	1.2	0.0925
219477_s_at	MRPS31P5	1.2	0.0943
221619_s_at	MTCH1	1.2	0.0773
226536_at	NSMCE2	1.2	0.0232
215157_x_at	PABPC1	1.2	0.057
202126_at	PRPF4B	1.2	0.096
200000_s_at	PRPF8	1.2	0.0366
204020_at	PURA	1.2	0.095
213205_s_at	RAD54L2	1.2	0.0022
201558_at	RAE1	1.2	0.0465
219816_s_at	RBM23	1.2	0.0495
223064_at	RNF181	1.2	0.0593
226619_at	SENP1	1.2	0.0603
219083_at	SHQ1	1.2	0.0655
218797_s_at	SIRT7	1.2	0.0305
201770_at	SNRPA	1.2	0.0703
222753_s_at	SPCS3	1.2	0.0444
221685_s_at	SPDL1	1.2	0.0661
222047_s_at	SRRT	1.2	0.0383
217646_at	SURF1	1.2	0.0382
203900_at	SZT2	1.2	0.0606
201764_at	TMEM106C	1.2	0.0033
222495_at	TMEM167B	1.2	0.0524
227710_s_at	TPT1-AS1	1.2	0.0571
200990_at	TRIM28	1.2	0.0407
218612_s_at	TSSC4	1.2	0.072
212898_at	TTI1	1.2	0.0126
212725_s_at	TUG1	1.2	0.0269
221712_s_at	WDR74	1.2	0.0648
244206_at	ZFAND4	1.2	0.0184
244132_x_at	ZNF518A	1.2	0.0232
1556552_a_at	ACSF3	-1.2	0.0791
225771_at	AP1G1	-1.2	0.095
1569325_at	ARPC5	-1.2	0.063
210419_at	BARX2	-1.2	0.0042
214933_at	CACNA1A	-1.2	0.0891
227136_s_at	CACUL1	-1.2	0.0822
201769_at	CLINT1	-1.2	0.0487
238479_at	DCUN1D5	-1.2	0.0798
238982_at	DENR	-1.2	0.0911
232973_at	DOCK1	-1.2	0.065
1555947_at	FAM120A	-1.2	0.0245
212835_at	FAM175B	-1.2	0.0717
212293_at	HIPK1	-1.2	0.0465
243354_at	HYDIN	-1.2	0.0505
204989_s_at	ITGB4	-1.2	0.0917
1552814_a_at	KLF14	-1.2	0.0332
237853_x_at	KRTAP10-12	-1.2	0.0683
240005_at	LARP4B	-1.2	0.0487
1569403_at	LOC101928716	-1.2	0.0491
232430_at	LOC148696	-1.2	0.0928
1558931_at	LRRC16A	-1.2	0.0458
1561429_a_at	MAATS1	-1.2	0.0127
232478_at	MIR181A2HG	-1.2	0.0807
226134_s_at	MSI2	-1.2	0.0189
1562256_at	NLRP1	-1.2	0.0523
242426_at	NRG4	-1.2	0.0494
231785_at	NTF4	-1.2	0.0353
207093_s_at	OMG	-1.2	0.0456
1556929_at	PAPOLG	-1.2	0.0188
218676_s_at	PCTP	-1.2	0.0079
220944_at	PGLYRP4	-1.2	0.0451
213893_x_at	PMS2P5	-1.2	0.0826
1565677_at	PRSS23	-1.2	0.0247
240615_at	PTOV1-AS1	-1.2	0.0316
220222_at	RBM12B-AS1	-1.2	0.0146
212120_at	RHOQ	-1.2	0.0639
206558_at	SIM2	-1.2	0.0873
231012_at	SLC35G1	-1.2	0.0623
1557336_at	SUCLG2-AS1	-1.2	0.0295
219892_at	TM6SF1	-1.2	0.0719
232941_at	TMPRSS6	-1.2	0.0046
239810_at	VASH1	-1.2	0.0388
1562953_s_at	WDFY3-AS2	-1.2	0.0451
209724_s_at	ZBTB14	-1.2	0.0294
1552283_s_at	ZDHHC11	-1.2	0.0133
218968_s_at	ZFP64	-1.2	0.0412
201856_s_at	ZFR	-1.2	0.0801
1565583_at	ZSCAN5A	-1.2	0.0209
216113_at	ABI2	-1.21	0.0388
203935_at	ACVR1	-1.21	0.0859
235649_at	ADAMTS8	-1.21	0.0011
229783_at	AKAP13	-1.21	0.0229
1555385_at	B4GALNT1	-1.21	0.0875
211761_s_at	CACYBP	-1.21	0.0557
231733_at	CARD18	-1.21	0.008
211883_x_at	CEACAM1	-1.21	0.0265
212746_s_at	CEP170	-1.21	0.0272
216900_s_at	CHRNA4	-1.21	0.0289
231066_s_at	CLCN4	-1.21	0.0158
1553442_a_at	CNTNAP4	-1.21	0.0055
225804_at	CYB5D2	-1.21	0.038
221080_s_at	DENND1C	-1.21	0.0165
1558502_s_at	DNM3	-1.21	0.0049
237292_at	DPYSL3	-1.21	0.0113
204817_at	ESPL1	-1.21	0.0682
232662_x_at	FAM213A	-1.21	0.0754
213689_x_at	FAM69A	-1.21	0.0178
207683_at	FOXN1	-1.21	0.0097
206673_at	GPR176	-1.21	0.0271
217008_s_at	GRM7	-1.21	0.0674
244442_at	HORMAD2	-1.21	0.0333
237652_at	IQSEC2	-1.21	0.0629
203849_s_at	KIF1A	-1.21	0.0928
211389_x_at	KIR3DS1	-1.21	0.0963
1556012_at	KLHDC7A	-1.21	0.0035
205470_s_at	KLK11	-1.21	0.0349
223977_s_at	LINC00470	-1.21	0.005
1561518_at	LINC01566	-1.21	0.0135
1552865_a_at	LMNTD1	-1.21	0.0473
216794_at	LOC100289518	-1.21	0.0136
81737_at	LOC100505915	-1.21	0.0203
210805_x_at	RUNX1	-1.21	0.0633
236914_at	LOC100506790	-1.21	0.0609
1561420_a_at	LOC101927051	-1.21	0.087
243340_at	LOC105375769	-1.21	0.0238
1558109_x_at	LOC283788	-1.21	0.001
220254_at	LRP12	-1.21	0.0235
228360_at	LYPD6B	-1.21	0.0688
209942_x_at	MAGEA3	-1.21	0.0099
226225_at	MCC	-1.21	0.0026
220839_at	METTL5	-1.21	0.0839
1562051_at	MIR646HG	-1.21	0.0047
225233_at	MSI2	-1.21	0.0117
227559_at	NDUFAF4	-1.21	0.0623
231235_at	NKTR	-1.21	0.0719
210388_at	PLCB2	-1.21	0.0625
1556291_at	POM121L12	-1.21	0.0427
217689_at	PTPN1	-1.21	0.0822
207405_s_at	RAD17	-1.21	0.0861
211578_s_at	RPS6KB1	-1.21	0.0023
232108_at	SCRN3	-1.21	0.0251
230911_at	SIX1	-1.21	0.0291
1553804_a_at	SPATA32	-1.21	0.0166
232763_at	TLN1	-1.21	0.0755
1552892_at	TNFRSF13C	-1.21	0.0417
201535_at	UBL3	-1.21	0.0391
202745_at	USP8	-1.21	0.0183
213196_at	ZNF629	-1.21	0.0884
206059_at	ZNF91	-1.21	0.0336
235968_at	AGAP1	-1.22	0.0646
201879_at	ARIH1	-1.22	0.0368
225707_at	ARL6IP6	-1.22	0.036
202265_at	BMI1	-1.22	0.003
1568606_at	C11orf88	-1.22	0.0107
235369_at	C14orf28	-1.22	0.0504
231905_at	C20orf96	-1.22	0.0375
209726_at	CA11	-1.22	0.0848
207129_at	CA5B	-1.22	0.0948
1568617_a_at	CAMSAP3	-1.22	0.0098
211208_s_at	CASK	-1.22	0.0195
207006_s_at	CCDC106	-1.22	0.0227
205987_at	CD1C	-1.22	0.0646
206736_x_at	CHRNA4	-1.22	0.0119
225053_at	CNOT7	-1.22	0.0074
222686_s_at	CPPED1	-1.22	0.0878
203081_at	CTNNBIP1	-1.22	0.0921
231796_at	EPHA8	-1.22	0.0072
211119_at	ESR2	-1.22	0.077
237033_at	FAM159A	-1.22	0.0723
205409_at	FOSL2	-1.22	0.0505
206678_at	GABRA1	-1.22	0.0527
206010_at	HABP2	-1.22	0.0397
236203_at	HLA-DQA1	-1.22	0.0128
212999_x_at	HLA-DQB1	-1.22	0.0232
219372_at	IFT81	-1.22	0.0883
233969_at	IGLV9-49	-1.22	0.0075
225268_at	KPNA4	-1.22	0.059
243813_at	LINC00968	-1.22	0.0787
241922_at	LMO4	-1.22	0.0462
1563709_at	LOC100127955	-1.22	0.0036
1557406_s_at	LOC100130111	-1.22	0.0203
1564317_at	LOC105370963	-1.22	0.0437
1560844_at	LOC105378052	-1.22	0.0322
230921_s_at	MAP3K12	-1.22	0.0895
237332_at	MON2	-1.22	0.0826
233993_at	MUC3	-1.22	0.0633
1569594_a_at	NEMF	-1.22	0.0364
226103_at	NEXN	-1.22	0.0741
226880_at	NUCKS1	-1.22	0.0452
220645_at	NXPE4	-1.22	0.0476
1560451_at	PKN3	-1.22	0.0863
216843_x_at	PMS2P1	-1.22	0.0462
224909_s_at	PREX1	-1.22	0.05
1556582_at	PVR	-1.22	0.0791
1553982_a_at	RAB7B	-1.22	0.0092
1553722_s_at	RNF152	-1.22	0.0164
204245_s_at	RPP14	-1.22	0.0568
1556063_s_at	RPP30	-1.22	0.0308
219493_at	SHCBP1	-1.22	0.0764
219820_at	SLC6A16	-1.22	0.0065
231021_at	SLC6A19	-1.22	0.0333
210394_x_at	SSX4	-1.22	0.0063
215444_s_at	TRIM31	-1.22	0.0403
221305_s_at	UGT1A8	-1.22	0.0997
242780_at	VAPA	-1.22	0.0767
232417_x_at	ZDHHC11	-1.22	0.0817
232303_at	ZNF608	-1.22	0.0815
235610_at	ALKBH8	-1.23	0.0905
210876_at	ANXA2P1	-1.23	0.0081
219023_at	AP1AR	-1.23	0.0221
229879_at	ASPH	-1.23	0.0845
1559485_at	ATG2B	-1.23	0.0415
219439_at	C1GALT1	-1.23	0.0515
211888_x_at	CASP10	-1.23	0.0563
241911_at	CDKL3	-1.23	0.0842
243129_at	CXorf40A	-1.23	0.0396
1558120_at	DDX3X	-1.23	0.0059
231345_s_at	DHRS12	-1.23	0.0766
1558342_x_at	DIXDC1	-1.23	0.0025
210736_x_at	DTNA	-1.23	0.0379
205757_at	ENTPD5	-1.23	0.0826
229374_at	EPHA4	-1.23	0.0118
229382_at	FAM212B	-1.23	0.0159
224452_s_at	FAM220A	-1.23	0.0487
242034_at	FBXL17	-1.23	0.047
214284_s_at	FGF18	-1.23	0.063
225853_at	GNPNAT1	-1.23	0.0981
220763_at	HSPA12A	-1.23	0.022
201193_at	IDH1	-1.23	0.0212
215906_at	Igk	-1.23	0.0692
200993_at	IPO7	-1.23	0.0167
238485_at	IQCH-AS1	-1.23	0.0161
201188_s_at	ITPR3	-1.23	0.0159
234744_x_at	KIF20B	-1.23	0.0232
211336_x_at	LILRB1	-1.23	0.0269
216838_at	LINC01278	-1.23	0.078
206606_at	LIPC	-1.23	0.0939
1562627_at	LOC100130078	-1.23	0.0401
236595_at	LOC101928152	-1.23	0.0571
236111_at	LOC102723927	-1.23	0.0222
229612_at	LOC105371491	-1.23	0.0365
1560638_a_at	LOC105375839	-1.23	0.0122
1556400_at	LOC105378589	-1.23	0.0046
1563853_at	LOC283045	-1.23	0.0344
225469_at	LYRM5	-1.23	0.0845
237413_at	MAPK10	-1.23	0.0601
218853_s_at	MOSPD1	-1.23	0.0567
237083_at	MRPS33	-1.23	0.0327
218947_s_at	MTPAP	-1.23	0.0497
1552405_at	NLRP5	-1.23	0.0196
220671_at	NOCT	-1.23	0.0173
233865_at	NPAS3	-1.23	0.0293
218197_s_at	OXR1	-1.23	0.016
244126_at	PEX11G	-1.23	0.0337
207938_at	PI15	-1.23	0.0055
214990_at	PIGO	-1.23	0.0087
220923_s_at	PNMA3	-1.23	0.0149
219926_at	POPDC3	-1.23	0.0327
210236_at	PPFIA1	-1.23	0.0287
235016_at	REEP3	-1.23	0.0614
236292_at	RNF130	-1.23	0.0235
236465_at	RNF175	-1.23	0.015
213633_at	SH3BP1	-1.23	0.0742
228175_at	SLC4A8	-1.23	0.0026
202523_s_at	SPOCK2	-1.23	0.0371
229634_at	TMEM139	-1.23	0.0169
1559785_at	TPPP2	-1.23	0.0028
242497_at	TRAFD1	-1.23	0.0766
223132_s_at	TRIM8	-1.23	0.0515
213563_s_at	TUBGCP2	-1.23	0.0585
217799_x_at	UBE2H	-1.23	0.0587
1555063_at	USP6	-1.23	0.0831
1554349_at	XRCC6BP1	-1.23	0.0463
1565848_at	ZNF428	-1.23	0.018
230264_s_at	AP1S2	-1.24	0.062
1561976_at	C1orf167	-1.24	0.0706
212848_s_at	C9orf3	-1.24	0.0218
206011_at	CASP1	-1.24	0.0522
205941_s_at	COL10A1	-1.24	0.006
219079_at	CYB5R4	-1.24	0.0899
226578_s_at	DUSP1	-1.24	0.0096
207484_s_at	EHMT2	-1.24	0.0364
205994_at	ELK4	-1.24	0.0228
200842_s_at	EPRS	-1.24	0.053
201636_at	FXR1	-1.24	0.02
217077_s_at	GABBR2	-1.24	0.0967
201723_s_at	GALNT1	-1.24	0.0583
235387_at	GSTCD	-1.24	0.0551
208566_at	KCNJ12	-1.24	0.0267
232836_at	LINC00687	-1.24	0.0689
227181_at	LNP1	-1.24	0.0149
1560131_at	LOC100506497	-1.24	0.0262
216259_at	LOC100506699	-1.24	0.0743
227571_at	LOC105371763	-1.24	0.0199
203836_s_at	MAP3K5	-1.24	0.0936
236440_at	NETO1	-1.24	0.0908
1562257_x_at	NLRP1	-1.24	0.0482
238530_at	NNT	-1.24	0.0429
222825_at	OTUD6B	-1.24	0.0222
235909_at	PCBP1-AS1	-1.24	0.0615
1560939_at	PCOLCE-AS1	-1.24	0.0388
238165_at	PDZRN3-AS1	-1.24	0.0812
1555004_a_at	RBL1	-1.24	0.0197
208314_at	RRH	-1.24	0.0242
205152_at	SLC6A1	-1.24	0.0379
214668_at	SPRYD7	-1.24	0.0133
212184_s_at	TAB2	-1.24	0.0347
220634_at	TBX4	-1.24	0.0591
212385_at	TCF4	-1.24	0.0326
227397_at	TPM2	-1.24	0.0686
238657_at	UBXN10	-1.24	0.0774
201760_s_at	WSB2	-1.24	0.0378
214814_at	YTHDC1	-1.24	0.0858
1558698_at	ZNF264	-1.24	0.0532
223093_at	ANKH	-1.25	0.0435
203300_x_at	AP1S2	-1.25	0.0765
202044_at	ARHGAP35	-1.25	0.0012
228184_at	DISP1	-1.25	0.0382
1554965_at	FILIP1L	-1.25	0.0544
226214_at	GDE1	-1.25	0.0514
216892_at	IGHG1	-1.25	0.0153
208415_x_at	ING1	-1.25	0.0769
227565_at	KLHL5	-1.25	0.0728
1558533_at	KRBA2	-1.25	0.0984
205266_at	LIF	-1.25	0.0094
1559929_at	LINC01186	-1.25	0.0041
1561218_s_at	LOC728099	-1.25	0.0005
235770_at	MASP1	-1.25	0.0108
208328_s_at	MEF2A	-1.25	0.0951
203434_s_at	MME	-1.25	0.0501
225896_at	MPRIP	-1.25	0.0886
224304_x_at	NIN	-1.25	0.0417
202876_s_at	PBX2	-1.25	0.0835
208530_s_at	RARB	-1.25	0.0735
214281_s_at	RCHY1	-1.25	0.0903
204351_at	S100P	-1.25	0.0313
1562239_at	SGSM1	-1.25	0.0291
231352_at	SLC22A8	-1.25	0.0027
1554181_at	SNX32	-1.25	0.0189
227632_at	TBC1D24	-1.25	0.0861
221843_s_at	TLDC1	-1.25	0.0451
202080_s_at	TRAK1	-1.25	0.0445
1555461_at	TXNL4A	-1.25	0.0256
224764_at	ARHGAP21	-1.26	0.0374
226617_at	ARL5A	-1.26	0.0237
225863_s_at	C19orf12	-1.26	0.0193
227257_s_at	CACUL1	-1.26	0.0567
211814_s_at	CCNE2	-1.26	0.0149
234947_s_at	FAM204A	-1.26	0.0566
238472_at	FBXO9	-1.26	8.87e-05
201724_s_at	GALNT1	-1.26	0.0798
219267_at	GLTP	-1.26	0.0843
235114_x_at	HOOK3	-1.26	0.0048
1561411_at	LINC01222	-1.26	0.0059
206718_at	LMO1	-1.26	0.0698
227451_s_at	MCUR1	-1.26	0.0853
235794_at	MOBP	-1.26	0.0111
228846_at	MXD1	-1.26	0.0332
215857_at	NCLN	-1.26	0.0221
217722_s_at	NGRN	-1.26	0.0424
233657_at	OPN5	-1.26	0.0727
220157_x_at	PLEKHA8P1	-1.26	0.0001
242201_at	PMS2P5	-1.26	0.0692
211540_s_at	RB1	-1.26	0.0977
1554864_a_at	SDC3	-1.26	0.0845
222248_s_at	SIRT4	-1.26	0.0311
232092_at	SLC25A51	-1.26	0.0637
212005_at	SZRD1	-1.26	0.0495
202823_at	TCEB1	-1.26	0.0331
1555858_at	THUMPD3-AS1	-1.26	0.0637
231554_at	TPD52L3	-1.26	0.0248
220069_at	TUBA8	-1.26	0.0979
218050_at	UFM1	-1.26	0.0474
238132_at	WBSCR16	-1.26	0.0517
226484_at	ZBTB47	-1.26	0.076
240155_x_at	ZNF493	-1.26	0.0466
206250_x_at	AVPR1A	-1.27	0.058
237793_at	C20orf78	-1.27	0.003
228083_at	CACNA2D4	-1.27	0.0012
225257_at	CCDC97	-1.27	0.0802
1552964_at	CFAP46	-1.27	0.0324
240030_at	COMMD6	-1.27	0.009
224703_at	DCAF5	-1.27	0.0367
211551_at	EGFR	-1.27	5.54e-05
201936_s_at	EIF4G3	-1.27	0.0937
1558761_a_at	FAM120AOS	-1.27	0.0558
225351_at	FAM45A	-1.27	0.0363
235535_x_at	FRG1	-1.27	0.0337
204973_at	GJB1	-1.27	0.0341
1559678_s_at	GS1-24F4.2	-1.27	0.0021
203260_at	HDDC2	-1.27	0.0172
216302_at	HNRNPCL1	-1.27	0.0382
241355_at	HR	-1.27	0.0005
240479_at	HS3ST5	-1.27	0.0761
1552813_at	KLF14	-1.27	0.0778
207811_at	KRT12	-1.27	0.0082
1564281_at	LINC00491	-1.27	0.0066
236080_at	LOC100507670	-1.27	0.0168
1561446_at	LOC101928443	-1.27	0.0409
205859_at	LY86	-1.27	0.0646
219217_at	NARS2	-1.27	0.0024
240391_at	NDUFB2	-1.27	0.008
223661_at	NUCKS1	-1.27	0.0218
203056_s_at	PRDM2	-1.27	0.0123
206272_at	RAB4A	-1.27	0.02
217813_s_at	SPIN1	-1.27	0.0885
1552293_at	TMEM196	-1.27	0.0019
216844_at	ZC3H7B	-1.27	0.0529
214922_at	ZNF484	-1.27	0.0736
1552579_a_at	ADAM21	-1.28	0.0158
225731_at	ANKRD50	-1.28	0.073
222780_s_at	BAALC	-1.28	0.0048
217809_at	BZW2	-1.28	0.0579
220039_s_at	CDKAL1	-1.28	0.0257
234480_at	DKFZP761C1711	-1.28	0.0056
225939_at	EIF4E3	-1.28	0.0154
244822_at	GART	-1.28	0.0343
213129_s_at	GCSH	-1.28	0.0316
223837_at	GULP1	-1.28	0.0753
218306_s_at	HERC1	-1.28	0.022
219983_at	HRASLS	-1.28	0.0697
216760_at	HRASLS2	-1.28	0.0031
1552915_at	IFNL2	-1.28	0.0616
1555476_at	IREB2	-1.28	0.0623
211519_s_at	KIF2C	-1.28	0.0456
200915_x_at	KTN1	-1.28	0.0183
230685_at	LINC01184	-1.28	0.0216
1569517_at	LOC646482	-1.28	0.0662
205813_s_at	MAT1A	-1.28	0.0025
225790_at	MSRB3	-1.28	0.071
237867_s_at	PID1	-1.28	0.0344
227403_at	PIGX	-1.28	0.0121
208994_s_at	PPIG	-1.28	0.0884
229506_at	PPM1L	-1.28	0.0271
1554355_a_at	SIAE	-1.28	0.0088
226010_at	SLC25A23	-1.28	0.0623
237765_at	SLC25A47	-1.28	0.0983
205972_at	SLC38A3	-1.28	0.0857
1554432_x_at	SMIM11A	-1.28	0.009
222412_s_at	SSR3	-1.28	0.0613
208762_at	SUMO1	-1.28	0.0109
235737_at	TSLP	-1.28	0.0612
216957_at	USP22	-1.28	0.0199
227402_s_at	UTP23	-1.28	0.0641
202778_s_at	ZMYM2	-1.28	0.0863
1560921_at	ZNF169	-1.28	0.0316
235164_at	ZNF25	-1.28	0.0441
218158_s_at	APPL1	-1.29	0.0391
229394_s_at	ARHGAP35	-1.29	0.0584
226464_at	C3orf58	-1.29	0.0313
1569044_at	CDC42BPG	-1.29	0.0256
218250_s_at	CNOT7	-1.29	0.0576
223138_s_at	DHX36	-1.29	0.0861
1552705_at	DUSP19	-1.29	0.0274
205066_s_at	ENPP1	-1.29	0.0603
227203_at	FBXL17	-1.29	0.0507
1566507_a_at	FBXO9	-1.29	0.0206
207966_s_at	GLG1	-1.29	0.0984
1552766_at	HS6ST2	-1.29	0.0023
215485_s_at	ICAM1	-1.29	0.0654
211000_s_at	IL6ST	-1.29	0.0115
223559_s_at	INIP	-1.29	0.0164
214709_s_at	KTN1	-1.29	0.0138
1561443_at	LOC101928535	-1.29	0.003
209840_s_at	LRRN3	-1.29	0.0225
235836_at	MXRA7	-1.29	0.0013
201927_s_at	PKP4	-1.29	0.091
231370_at	PPM1A	-1.29	0.0864
231290_at	RCCD1	-1.29	0.0092
230720_at	RNF182	-1.29	0.0409
235692_at	SH3KBP1	-1.29	0.0454
206928_at	ZNF124	-1.29	0.045
205771_s_at	AKAP7	-1.3	0.0672
222518_at	ARFGEF2	-1.3	0.0933
209281_s_at	ATP2B1	-1.3	0.0263
236296_x_at	C8orf58	-1.3	0.069
216725_at	DCLK2	-1.3	0.0486
1563471_at	EPG5	-1.3	0.0918
206114_at	EPHA4	-1.3	0.0653
1555948_s_at	FAM120A	-1.3	0.0101
224779_s_at	FAM96A	-1.3	0.0161
202321_at	GGPS1	-1.3	0.0137
212959_s_at	GNPTAB	-1.3	0.0126
35436_at	GOLGA2	-1.3	0.0775
217511_at	KAZALD1	-1.3	0.072
217120_s_at	MED14	-1.3	0.0008
243096_at	NDEL1	-1.3	0.0001
206889_at	PDIA2	-1.3	0.0447
203338_at	PPP2R5E	-1.3	0.0619
214449_s_at	RHOQ	-1.3	0.097
217865_at	RNF130	-1.3	0.0303
242882_at	RNF207	-1.3	0.0644
209006_s_at	RSRP1	-1.3	0.0445
1556178_x_at	TAF8	-1.3	0.028
243423_at	TNIP1	-1.3	0.0809
226637_at	UBE2H	-1.3	0.0461
201534_s_at	UBL3	-1.3	0.014
223289_s_at	USP38	-1.3	0.0637
238081_at	WDFY3-AS2	-1.3	0.0312
236557_at	ZBTB38	-1.3	0.0986
238647_at	C14orf28	-1.31	0.0527
241842_x_at	C19orf45	-1.31	0.0057
222301_at	C1orf61	-1.31	0.0419
207719_x_at	CEP170	-1.31	0.0432
207572_at	EFCAB2	-1.31	0.0981
210361_s_at	ELF2	-1.31	0.0533
230964_at	FREM2	-1.31	0.0907
202488_s_at	FXYD3	-1.31	0.0112
229458_s_at	GALK1	-1.31	0.0278
1568618_a_at	GALNT1	-1.31	0.0408
215030_at	GRSF1	-1.31	0.0898
206858_s_at	HOXC6	-1.31	0.0288
231103_at	KCNN3	-1.31	0.0219
228446_at	KIAA2026	-1.31	0.0075
228412_at	LOC643072	-1.31	0.0359
227226_at	MRAP2	-1.31	0.0056
201602_s_at	PPP1R12A	-1.31	0.0838
217273_at	PRAMEF10	-1.31	0.0308
210231_x_at	SET	-1.31	0.0884
202818_s_at	TCEB3	-1.31	0.0074
214600_at	TEAD1	-1.31	0.0754
228998_at	TNRC6B	-1.31	0.0654
203048_s_at	TTC37	-1.31	0.0059
202836_s_at	TXNL4A	-1.31	0.0309
222600_s_at	UBA6	-1.31	0.0828
235713_at	ALKBH8	-1.32	0.0734
230724_s_at	C11orf57	-1.32	0.0362
242913_at	CLIC6	-1.32	0.0276
220734_s_at	CPTP	-1.32	0.0233
221081_s_at	DENND2D	-1.32	0.0081
1558237_x_at	DR1	-1.32	0.0976
1557128_at	FAM111B	-1.32	0.0766
202915_s_at	FAM20B	-1.32	0.0165
1554478_a_at	HEATR3	-1.32	0.0185
204949_at	ICAM3	-1.32	0.0262
207058_s_at	PARK2	-1.32	0.04
224505_s_at	PLCD4	-1.32	0.074
204919_at	PRR4	-1.32	0.0996
222810_s_at	RASAL2	-1.32	0.0916
221524_s_at	RRAGD	-1.32	0.0575
230820_at	SMURF2	-1.32	0.0412
1557338_x_at	SUCLG2-AS1	-1.32	0.0015
239315_at	TCAF2	-1.32	0.0423
212634_at	UFL1	-1.32	0.027
205092_x_at	ZBTB1	-1.32	0.0206
223968_at	ZNF44	-1.32	0.0449
238337_s_at	DNAJC21	-1.33	0.0882
212987_at	FBXO9	-1.33	0.0423
201722_s_at	GALNT1	-1.33	0.0381
200745_s_at	GNB1	-1.33	0.0501
205930_at	GTF2E1	-1.33	0.0099
212452_x_at	KAT6B	-1.33	0.0043
236138_at	LMBRD2	-1.33	0.0053
225782_at	MSRB3	-1.33	0.0209
205731_s_at	NCOA2	-1.33	0.002
219126_at	PHF10	-1.33	0.0053
204940_at	PLN	-1.33	0.0595
224394_at	RNF7	-1.33	0.0527
203704_s_at	RREB1	-1.33	0.0216
224928_at	SETD7	-1.33	0.0597
236418_at	TTLL10	-1.33	0.0886
237059_at	VTA1	-1.33	0.0386
1557283_a_at	ZNF519	-1.33	0.0268
225674_at	BCAP29	-1.34	0.028
220885_s_at	CENPJ	-1.34	0.0278
215930_s_at	CTAGE5	-1.34	0.0899
219963_at	DUSP13	-1.34	0.041
201777_s_at	EFCAB14	-1.34	0.0043
210253_at	HTATIP2	-1.34	0.0571
213446_s_at	IQGAP1	-1.34	0.0549
239517_at	ITGB6	-1.34	0.0098
1568619_s_at	ITPRIPL2	-1.34	0.094
200914_x_at	KTN1	-1.34	0.0283
230057_at	LOC285178	-1.34	0.0096
227532_at	LRRC39	-1.34	0.0326
238543_x_at	MDGA1	-1.34	0.0204
204059_s_at	ME1	-1.34	0.0249
228304_at	RBM43	-1.34	0.0205
210286_s_at	SLC4A7	-1.34	0.0046
233841_s_at	SUDS3	-1.34	0.0378
229706_at	TCERG1	-1.34	0.042
1558306_at	THADA	-1.34	0.0419
1553809_a_at	TMEM252	-1.34	0.0134
228715_at	ZCCHC12	-1.34	4.83e-05
212758_s_at	ZEB1	-1.34	0.0881
200779_at	ATF4	-1.35	0.0353
202387_at	BAG1	-1.35	0.0856
227455_at	C6orf136	-1.35	0.0633
229804_x_at	CBWD2	-1.35	0.0773
227084_at	DTNA	-1.35	0.0531
227410_at	FAM43A	-1.35	0.0123
202322_s_at	GGPS1	-1.35	0.017
238900_at	HLA-DRB1	-1.35	0.0227
217951_s_at	PHF3	-1.35	0.0592
229376_at	PROX1	-1.35	0.0336
238574_at	SLC25A51	-1.35	0.0469
243492_at	THEM4	-1.35	0.0049
205742_at	TNNI3	-1.35	0.0325
203319_s_at	ZNF148	-1.35	0.0173
209203_s_at	BICD2	-1.36	0.0187
239135_at	CPPED1	-1.36	0.0317
205677_s_at	DLEU1	-1.36	0.0946
223847_s_at	ERGIC1	-1.36	0.0279
226535_at	ITGB6	-1.36	0.0542
239398_at	KLHL31	-1.36	0.0096
213803_at	KPNB1	-1.36	0.0801
211424_x_at	METTL7A	-1.36	0.1
243357_at	NEGR1	-1.36	0.0174
229705_at	PIK3C3	-1.36	0.0221
203096_s_at	RAPGEF2	-1.36	0.0891
204171_at	RPS6KB1	-1.36	0.0021
238079_at	TPM3	-1.36	0.0755
231403_at	TRIO	-1.36	0.0616
1552536_at	VTI1A	-1.36	0.0423
1554762_a_at	WWC2	-1.36	0.0007
212637_s_at	WWP1	-1.36	0.0126
203684_s_at	BCL2	-1.37	0.0178
231044_at	C1orf194	-1.37	0.0325
231862_at	CBX5	-1.37	0.0327
209396_s_at	CHI3L1	-1.37	0.0988
230364_at	CHPT1	-1.37	0.0274
223445_at	DTNBP1	-1.37	0.0546
230645_at	FRMD3	-1.37	0.0253
240069_at	LOC102724880	-1.37	0.0364
238515_at	NUDT16	-1.37	0.0048
214807_at	PLXDC2	-1.37	0.0439
203581_at	RAB4A	-1.37	0.031
212119_at	RHOQ	-1.37	0.0072
238909_at	S100A10	-1.37	0.0776
233801_s_at	SEMA6D	-1.37	0.0465
244377_at	SLC1A4	-1.37	0.0296
221006_s_at	SNX27	-1.37	0.0376
226445_s_at	TRIM41	-1.37	0.0564
236514_at	ACOT8	-1.38	0.0577
229252_at	ATG9B	-1.38	0.0033
201732_s_at	CLCN3	-1.38	0.0919
238002_at	GOLIM4	-1.38	0.0384
1555439_at	GTF3C3	-1.38	0.0089
34697_at	LRP6	-1.38	0.0471
211675_s_at	MDFIC	-1.38	0.0221
213264_at	PCBP2	-1.38	0.001
239798_at	PDK1	-1.38	0.0852
205934_at	PLCL1	-1.38	0.0698
214081_at	PLXDC1	-1.38	0.0652
204430_s_at	SLC2A5	-1.38	0.0714
205443_at	SNAPC1	-1.38	0.0585
227988_s_at	VPS13A	-1.38	0.0685
211993_at	WNK1	-1.38	0.0135
1554469_at	ZBTB44	-1.38	0.0283
209213_at	CBR1	-1.39	0.0881
1558515_at	FTX	-1.39	0.0652
221606_s_at	HMGN5	-1.39	0.0092
1555037_a_at	IDH1	-1.39	0.0074
227870_at	IGDCC4	-1.39	0.0232
240306_at	LINC00312	-1.39	0.0067
1555893_at	LOC105375624	-1.39	0.0005
243552_at	MBTD1	-1.39	0.0205
221367_at	MOS	-1.39	0.0139
239303_at	PIWIL2	-1.39	0.0331
204517_at	PPIC	-1.39	0.0244
231509_at	PPP1R17	-1.39	0.001
1562930_at	SRRM2-AS1	-1.39	0.0098
213108_at	CAMK2A	-1.4	0.0189
212580_at	CAST	-1.4	0.0043
228948_at	EPHA4	-1.4	0.006
216044_x_at	FAM69A	-1.4	0.0021
233884_at	HIVEP3	-1.4	0.0043
1561673_at	LOC101929151	-1.4	0.0565
209199_s_at	MEF2C	-1.4	0.0154
213955_at	MYOZ3	-1.4	0.0483
211466_at	NFIB	-1.4	0.0296
227947_at	PHACTR2	-1.4	0.0197
205633_s_at	ALAS1	-1.41	0.0431
215554_at	GPLD1	-1.41	0.0802
222369_at	NAA40	-1.41	0.0719
229461_x_at	NEGR1	-1.41	0.0206
208734_x_at	RAB2A	-1.41	0.0604
201580_s_at	TMX4	-1.41	0.0026
235343_at	VASH2	-1.41	0.0856
232125_at	ZBTB20	-1.41	0.0699
227803_at	ENPP5	-1.42	0.0761
226776_at	ENY2	-1.42	0.0098
204786_s_at	IFNAR2	-1.42	0.0105
214496_x_at	KAT6B	-1.42	0.0016
209552_at	PAX8	-1.42	0.0914
223588_at	THAP2	-1.42	0.0171
1564381_s_at	CEBPZOS	-1.43	0.0142
222234_s_at	DBNDD1	-1.43	0.0163
239425_at	DCUN1D5	-1.43	0.0042
225267_at	KPNA4	-1.43	0.0071
1556748_x_at	LOC101928343	-1.43	0.0263
223734_at	MGARP	-1.43	0.0734
227418_at	MSANTD4	-1.43	0.0094
227326_at	MXRA7	-1.43	0.0024
222304_x_at	OR7E47P	-1.43	0.0688
204047_s_at	PHACTR2	-1.43	0.0063
51228_at	RBM12B	-1.43	0.0723
228186_s_at	RSPO3	-1.43	0.0785
223028_s_at	SNX9	-1.43	0.0511
228324_at	CARNMT1	-1.44	0.0083
232127_at	CLCN5	-1.44	0.0118
239533_at	GPR155	-1.44	0.0481
205770_at	GSR	-1.44	0.0633
205787_x_at	ZC3H11A	-1.44	0.0559
236356_at	NDUFS1	-1.44	0.0478
235030_at	NXPE3	-1.44	0.077
210057_at	SMG1	-1.44	0.0344
203176_s_at	TFAM	-1.44	0.0487
225735_at	ANKRD50	-1.45	0.079
209750_at	NR1D2	-1.45	0.0193
228010_at	PPP2R2C	-1.45	0.0655
220047_at	SIRT4	-1.45	0.0087
212870_at	SOS2	-1.45	0.0537
1552521_a_at	TMEM74	-1.45	0.081
213836_s_at	WIPI1	-1.45	0.0235
226608_at	C16orf87	-1.46	0.0316
228693_at	CCDC50	-1.46	0.0051
209666_s_at	CHUK	-1.46	0.0749
223505_s_at	DNAJC27	-1.46	0.0787
208622_s_at	EZR	-1.46	0.0943
214711_at	GATC	-1.46	0.0498
203496_s_at	MED1	-1.46	0.0827
206686_at	PDK1	-1.46	0.0484
219225_at	PGBD5	-1.46	0.0789
241859_at	PLCL1	-1.46	0.0532
222420_s_at	UBE2H	-1.46	0.023
232315_at	ZNF880	-1.46	0.0527
204066_s_at	AGAP1	-1.47	0.0315
241403_at	CLK4	-1.47	0.067
219984_s_at	HRASLS	-1.47	0.037
201362_at	IVNS1ABP	-1.47	0.0585
213328_at	NEK1	-1.47	0.0587
228602_at	SGCD	-1.47	0.0538
1553593_a_at	TAL2	-1.47	0.0702
222731_at	ZDHHC2	-1.47	0.0215
217761_at	ADI1	-1.48	0.0722
235962_at	AZI2	-1.48	0.0249
212551_at	CAP2	-1.48	0.0883
201938_at	CDK2AP1	-1.48	0.0226
202534_x_at	DHFR	-1.48	0.0285
208430_s_at	DTNA	-1.48	0.0315
1552516_a_at	HIPK1	-1.48	0.0126
228275_at	LINC00888	-1.48	0.0939
212208_at	MED13L	-1.48	0.0884
214745_at	PLCH1	-1.48	0.006
244547_at	SGK494	-1.48	0.078
224218_s_at	TRPS1	-1.48	0.0008
243176_at	ARL5A	-1.49	0.0926
212763_at	CAMSAP2	-1.49	0.0042
220454_s_at	SEMA6A	-1.49	0.0104
230457_at	TMEM242	-1.49	0.0332
205364_at	ACOX2	-1.5	0.0227
231873_at	BMPR2	-1.5	0.0918
202971_s_at	DYRK2	-1.5	0.0808
204324_s_at	GOLIM4	-1.5	0.0228
209480_at	HLA-DQB1	-1.5	0.0141
222450_at	PMEPA1	-1.5	0.0651
223824_at	RNLS	-1.5	0.0654
214305_s_at	SF3B1	-1.5	0.0646
205596_s_at	SMURF2	-1.5	0.0027
204048_s_at	PHACTR2	-1.51	0.042
204284_at	PPP1R3C	-1.51	0.0631
239744_at	RGS3	-1.51	0.0278
213437_at	RUFY3	-1.51	0.0707
224908_s_at	TTL	-1.51	0.078
244293_at	UQCRB	-1.51	0.0245
237208_at	WDR61	-1.51	0.059
212638_s_at	WWP1	-1.51	0.0075
227039_at	AKAP13	-1.52	0.0291
224820_at	COX20	-1.52	0.0094
48808_at	DHFR	-1.52	0.0173
212771_at	FAM171A1	-1.52	0.0291
242600_at	FRMD3	-1.52	0.0696
201363_s_at	IVNS1ABP	-1.52	0.0553
209485_s_at	OSBPL1A	-1.52	0.0446
202082_s_at	SEC14L1	-1.52	0.0375
201070_x_at	SF3B1	-1.52	0.0698
208661_s_at	TTC3	-1.52	0.0876
226097_at	FNDC5	-1.53	0.024
208003_s_at	NFAT5	-1.53	0.0637
225640_at	EBLN3	-1.54	0.0472
218181_s_at	MAP4K4	-1.54	0.0502
223315_at	NTN4	-1.54	0.0991
221830_at	RAP2A	-1.54	0.0247
202644_s_at	TNFAIP3	-1.54	0.0365
239742_at	TULP4	-1.54	0.0502
211992_at	WNK1	-1.54	0.009
1558028_x_at	LINC00657	-1.55	0.0364
229323_at	LINC00959	-1.55	0.0057
213734_at	RFC5	-1.55	0.0313
202124_s_at	TRAK2	-1.55	0.0315
218280_x_at	HIST2H2AA3	-1.56	0.0629
204249_s_at	LMO2	-1.56	0.0897
205197_s_at	ATP7A	-1.57	0.0814
209883_at	COLGALT2	-1.57	0.0553
209574_s_at	LDLRAD4	-1.57	0.0022
213272_s_at	TMEM159	-1.57	0.0566
226338_at	TMEM55A	-1.57	0.0143
1566509_s_at	FBXO9	-1.58	0.0267
227125_at	IFNAR2	-1.58	0.0067
1563881_at	MAGI1	-1.58	0.0671
217875_s_at	PMEPA1	-1.58	0.0596
1553960_at	SNX21	-1.58	0.0667
229943_at	TRIM13	-1.58	0.0924
226500_at	ZBTB47	-1.59	0.0346
218935_at	EHD3	-1.6	0.0899
202619_s_at	PLOD2	-1.6	0.0031
[truncated: 127 more rows]

## Sheet: Table S9
Supplementary Table S9. IU adipose differentially expressed genes at 1.2 Fold change and p < 0.1 related to Figure 9
Gene	Fold Change	p-value
CYP1A1	6.86213	0.00366045
DMKN	4.78386	0.00184098
LOC642929	4.62113	0.00720772
KIAA1239	4.2766	0.000331778
C6	3.62484	0.000353788
CXCL9	3.46598	0.00101366
FAM70A	3.44622	1.45e-05
SOX10	3.31376	0.00118916
FCN2	3.29362	0.000386729
RYR3	3.2718	2.15e-05
C21orf15	3.21734	0.000808871
MAP1LC3C	3.16577	2.49e-06
CETP	3.05647	0.00108304
SLC6A15	2.94445	0.00151612
PRODH	2.84473	9.38e-05
SNHG1	2.816	4.87e-10
AMPH	2.74318	1.7e-06
NPFF	2.70054	6.82e-07
USP6	2.60874	0.0771217
AGPAT9	2.56857	0.0147137
OR2A42	2.52299	0.00544773
PRRT2	2.4815	8.74e-06
ZNF385B	2.44157	0.000193249
SNORA14B	2.4369	3.24e-05
CLDN1	2.4328	0.00202122
CNN1	2.41043	0.00597204
LOC647859	2.40705	0.0217463
ITLN1	2.3867	0.0748188
RPL13	2.35719	1.46e-11
ZNF224	2.31187	1.1e-06
SEMA3E	2.30942	8.18e-08
APOL4	2.29361	0.0042164
EPM2AIP1	2.28224	2.57e-05
RERGL	2.27939	0.00186396
SNORD94	2.27767	6.84e-06
CSN1S1	2.27742	0.0756483
PTPN3	2.27679	2.33e-08
GLUL	2.26419	0.00478804
HSPA1B	2.26002	0.0073348
LOC100270804	2.25286	0.000307002
SCN7A	2.24321	0.00986961
RGPD2	2.23942	0.0520844
LOC440173	2.19837	3.28e-05
NTRK3	2.19725	0.00363518
BAI3	2.19183	1.44e-05
SYT17	2.18863	0.00712214
SNORA62	2.18598	6.4e-05
STOX1	2.16899	0.00526706
EYA4	2.1527	0.0028276
FAM185A	2.14854	0.000156285
C1QTNF7	2.1431	7.37e-05
PRKD1	2.14164	1.15e-06
SBSPON	2.12475	0.0236266
LOC728643	2.1228	0.00354381
RRAD	2.11251	0.000449458
LOC100288778	2.10193	9.06e-06
LOC728392	2.09795	3.39e-06
CALCRL	2.09589	0.00186666
MYH11	2.09427	0.0253652
VWCE	2.09389	0.000920023
AHSA2	2.09042	3e-07
MSTO2P	2.08863	3.17e-06
SNORA6	2.08435	2.29e-05
NRIP2	2.08256	0.001339
CCT6P1	2.08199	0.000110971
SNORD17	2.08196	0.000147834
RDH13	2.08158	5.27e-06
PVRIG	2.08023	2.62e-07
IRF6	2.07777	0.00179405
WDR85	2.04624	2.16e-06
TRMT44	2.04034	1.47e-05
CNIH3	2.04002	0.00259036
MYOCD	2.03511	0.0032563
NEURL2	2.03482	0.000238538
SNORA14A	2.03473	0.000397927
LDB3	2.03114	0.00235279
SNORA48	2.02545	4.68e-05
C17orf76-AS1	2.02141	0.00414455
D2HGDH	2.01661	2.38e-05
SNORA42	2.0148	2.73e-10
GDF15	2.00693	0.0199391
CSDC2	2.00619	0.037556
LPIN1	2.0037	0.00108577
SEC14L1P1	1.99972	1.37e-06
ADRB2	1.9981	8.64e-05
ECHDC3	1.99708	0.00140773
SNORA71B	1.99019	3.4e-06
GREB1L	1.98131	0.00420615
GPR64	1.98089	0.0105332
ABCA7	1.97937	0.000287572
ADAMTS3	1.97699	0.0014576
BBC3	1.97564	0.000147251
SPEG	1.97476	0.0290482
RPS27	1.97234	5.14e-08
PLCXD3	1.95561	0.000527406
L3MBTL4	1.95365	8.7e-12
FBXO45	1.94542	1.65e-06
STON1	1.94301	1.87e-05
SNORA57	1.93778	0.00197585
PAPPA2	1.9366	0.0142227
PARP2	1.93337	6.66e-05
GXYLT2	1.93259	0.000191518
PFDN6	1.92993	1.06e-07
ADAMTS13	1.92874	0.0019723
MGAT3	1.92728	0.00303172
SRCIN1	1.92679	0.00404141
LBH	1.91797	0.000131245
ST3GAL3	1.90755	8.25e-05
TPSD1	1.90604	0.0445526
MMP11	1.90311	0.00159441
PPL	1.90169	0.00104728
RPS18	1.90083	5.35e-10
ZNF202	1.89721	1.44e-05
DEFB1	1.88827	0.0642513
NHS	1.88814	1.71e-07
POLI	1.88795	1.72e-08
LINC00115	1.88635	2.09e-05
MPP3	1.88603	0.000139945
HEBP2	1.88036	5.68e-08
AKR1CL1	1.87749	0.00524626
FAM50A	1.87724	4.52e-06
CHKA	1.87686	1.34e-05
ATP1A2	1.87578	0.00428112
COL4A5	1.87231	0.00186018
KRTCAP3	1.87016	0.00209685
GALT	1.87005	4.37e-05
FIBIN	1.868	0.000220514
RPL36A	1.86007	2.51e-09
ANKRD35	1.8584	1.73e-05
KCNK3	1.85739	0.059975
PLLP	1.85455	0.000790409
SNRNP25	1.8488	0.00144515
MYCBP2	1.84869	2.19e-08
KRT8	1.84827	8.32e-05
MRPS31P3	1.84657	2.2e-05
LOC554206	1.84556	0.000547675
SNORA27	1.84131	0.000244275
GALNTL4	1.83638	9.02e-05
EIF3M	1.83601	6.45e-09
ASB13	1.83145	0.000102873
PDDC1	1.82707	0.000305351
LGR6	1.82681	0.00746927
MYO19	1.8265	1.46e-06
CYP4B1	1.82514	0.015256
TRIM45	1.82393	0.00136035
TPO	1.82339	0.0255884
CRTAC1	1.8218	0.0420012
RNU12	1.82102	0.015559
ANKRD36B	1.82058	5.49e-05
FAM114A2	1.81916	3.11e-07
RPL32	1.81052	9.54e-09
WBSCR27	1.80917	0.067236
DUSP4	1.80741	0.00107514
HES1	1.80373	0.000509772
CHD7	1.80198	0.000174404
RBM20	1.8018	0.00139951
SCARNA10	1.79982	6.22e-05
SNORA47	1.79803	8.99e-06
LOC441455	1.7968	0.0166631
PHLDA3	1.79631	5.46e-07
WDR66	1.79622	0.000991977
PRUNE2	1.78573	0.0491653
SNORA33	1.78298	0.000778902
LOC100216545	1.78296	0.000300354
WIBG	1.78264	1.41e-06
DACT3	1.78201	0.0045348
SUSD5	1.78031	0.0350891
UBXN8	1.78017	0.00189318
ZNF519	1.77983	0.000942928
LOC283683	1.7751	0.00351785
VIPR2	1.77155	0.0374414
CSTA	1.76881	0.000335689
KIAA1841	1.76732	0.00142691
SNORA53	1.76731	0.00239472
NCOR1	1.76675	1.43e-05
LOC115110	1.76596	0.000477265
C4A	1.765	0.0464615
SFI1	1.76477	7.05e-05
COX4I1	1.76413	6.7e-06
CNKSR3	1.76407	0.000429459
DPRXP4	1.76281	0.0038688
CEMP1	1.76274	0.000140011
NT5DC3	1.75992	0.000424637
LOC100170939	1.75935	0.00335534
DPP4	1.75843	0.0064533
RPS15A	1.756	1.41e-08
YY1AP1	1.75512	0.00635819
USP32P2	1.7542	0.0234591
SARM1	1.75082	7.78e-07
NSUN5P1	1.75029	1.87e-07
LPIN3	1.7489	3.53e-05
FKBP1B	1.74856	0.00081203
CSDAP1	1.74827	0.0967662
MYH7B	1.74818	4.97e-05
LRRC3	1.74403	0.0017591
MRPL42P5	1.74386	0.000932243
ITGA8	1.7417	0.0616744
AGBL3	1.74044	0.00300104
SNORA59A	1.74004	3.09e-05
ZNF608	1.74003	5.43e-05
C1orf229	1.73859	0.00301449
SRL	1.7385	0.0138952
OFD1	1.73723	1.79e-08
GTF2H2B	1.73693	0.0401066
ZXDC	1.73636	6.8e-08
SNORA2B	1.73609	0.00356428
HIAT1	1.7353	4.03e-07
CUBN	1.73409	0.00100686
MPZL2	1.73364	0.0280233
FRK	1.73289	0.00188594
SNORA65	1.73196	4.32e-05
MCOLN3	1.73177	0.0113136
KLHL33	1.73072	0.00592726
FAM66A	1.73069	0.0583778
GABRE	1.72771	0.000374051
DIP2C	1.72573	3.9e-09
HSD17B13	1.72568	0.0120996
COMMD7	1.72541	6.96e-06
HMGN3	1.72433	0.000222698
LRRC49	1.72312	9.5e-06
GCFC1	1.72256	3.12e-05
TAS2R50	1.72133	0.00412346
SLC1A3	1.7211	0.000766194
KIAA0355	1.721	0.000323297
LOC91450	1.72073	0.018921
GRIA3	1.71988	0.00469864
SLCO4A1	1.71978	0.0375872
GOSR2	1.71886	0.000103542
NPNT	1.71869	0.00397769
SNORA9	1.71705	0.000249856
L1CAM	1.71663	0.00249021
SULT1C4	1.71649	0.00615606
LOC646168	1.71646	0.0483
PFAS	1.71617	2.46e-06
HIST2H2AC	1.71536	0.000131951
SNORA28	1.71409	0.00100213
SPDYE7P	1.71371	0.00140725
CDC14B	1.71329	0.000502089
SNORA67	1.71216	2.91e-05
RNF217	1.71208	3.7e-05
TTC13	1.71098	2.45e-07
SNORA10	1.71059	0.00484469
ACTG1P4	1.70869	0.00794487
OR10AD1	1.7065	0.023124
RPL32P3	1.70637	5e-05
COG3	1.70622	1.67e-08
NHP2	1.70551	7.62e-05
PCDHGC3	1.70526	0.0023493
KIAA0907	1.70516	5.46e-07
ALPK3	1.70414	0.0530263
SNURF	1.70376	2.45e-05
IZUMO4	1.70356	0.0022713
SERTAD4	1.70239	0.00729737
WDR17	1.70075	0.00149115
YLPM1	1.70069	3.87e-05
C10orf131	1.70013	0.0042717
KIAA0664L3	1.69958	0.00532349
HHIP	1.69591	0.0409588
LOC100289561	1.6955	0.00266682
TADA2A	1.69384	0.000190757
RAB11B-AS1	1.69374	0.00175551
DDX42	1.69367	8.33e-08
NLRP1	1.69223	2.31e-05
MUSTN1	1.69198	0.0129815
DDR1	1.69139	0.00276132
MECOM	1.69124	0.000354626
CCDC53	1.69099	0.0386945
ADAT2	1.69041	0.000130356
PNPLA7	1.68969	0.000195439
ZNF844	1.6883	6.81e-06
POT1	1.68735	4.98e-05
KIAA2026	1.68442	1.79e-05
AIP	1.68347	1.26e-06
RPS15AP10	1.6834	0.000343549
PHKG1	1.682	0.00199447
FSD1L	1.68114	0.00159308
LRP5L	1.68106	0.0120821
UBQLNL	1.68071	0.00155399
VCL	1.68055	0.0500143
SEPT4	1.67681	0.011595
SLC7A5P1	1.67655	0.00891302
GDPD3	1.67629	0.000142453
C5orf45	1.67556	1.99e-07
DNAJC27	1.67534	0.00010827
SNORA1	1.6746	0.0131335
CYP4Z1	1.67454	0.00370305
TBX21	1.67417	0.0432647
SNORA8	1.67405	0.00204086
LENG9	1.67399	0.00102981
MOB2	1.67379	0.0280524
GOLGA8I	1.67356	0.00293417
LOC286367	1.67273	0.0108687
FDPS	1.67256	3.29e-06
CACNA1H	1.67158	0.012664
PRF1	1.66986	0.0164579
MRPL48	1.66947	0.000284883
TRMT10C	1.66895	2.55e-05
CLDN23	1.66894	3.89e-05
MGC3771	1.66886	0.0111396
ADAMTSL2	1.66866	0.0110224
DNM3OS	1.66775	0.00276264
AQP7	1.667	0.000566666
ECHDC2	1.66695	0.00103506
DEF8	1.66602	0.0996481
METTL10	1.66543	3.39e-05
WDR73	1.66495	7.4e-07
PACS2	1.66469	1.49e-05
CELF6	1.66437	0.00041519
SNX29P2	1.66379	0.000182776
DCLRE1C	1.66363	4.48e-07
WDR6	1.66131	0.000633567
LOC100192204	1.66051	0.0123475
PLEKHH1	1.65829	0.0249103
SEC31B	1.65816	0.00670798
LOC440297	1.65309	0.0103404
CDKN1B	1.65247	2.77e-06
C17orf53	1.65221	0.0255151
PMS2P3	1.65213	9.42e-07
RBMX2	1.65096	1.73e-06
DIAPH2	1.65092	2.42e-08
LIFR	1.65017	0.0324642
C19orf44	1.6487	0.000251713
GRIPAP1	1.64611	0.000364294
SOGA2	1.64584	0.0101344
CITED2	1.64474	0.0259649
LNX2	1.64386	0.000979707
CCDC68	1.64349	0.00378989
MIR143HG	1.6425	0.00324436
MTERFD3	1.64209	2.85e-06
FRG1	1.64177	2.88e-06
IFT57	1.64138	5.59e-05
KLF8	1.64103	3.88e-06
ITPRIPL2	1.64029	5.46e-05
MIR548I1	1.63974	0.0103985
HIST1H2AK	1.63923	0.00059393
PCDHB5	1.63847	0.000339802
ZNF862	1.63835	0.00036561
SETD4	1.63825	0.000579323
ABCA9	1.63561	1.21e-05
UQCRH	1.63336	0.000588091
CNPY2	1.63304	4e-06
WASH1	1.63272	0.059663
GPCPD1	1.63267	3.04e-07
LPHN3	1.63261	0.00536894
ABCB11	1.63238	0.0712264
ATAD3B	1.6318	0.00414289
SREK1	1.63175	1.4e-08
ASPRV1	1.63172	0.00235359
AMT	1.63003	0.000210212
ITGA10	1.62953	0.0233605
FOXN3-AS2	1.62812	0.00921139
MNS1	1.62732	9.61e-05
FAM103A1	1.62688	7.55e-07
BMP5	1.6264	0.0363805
FAM166B	1.62618	0.0971162
LOC652276	1.6261	0.000451074
MED30	1.62536	2.64e-06
GATAD1	1.62533	1.75e-08
ZNF22	1.62475	5.93e-08
LDLRAD3	1.62466	0.00315608
CYB5A	1.62326	0.00136454
RNPC3	1.62287	0.000166606
FAM212A	1.62261	0.0139592
RPL23AP32	1.62046	0.00485276
KLHDC1	1.61812	0.000208435
MCCC1	1.61791	0.000489517
ADCY5	1.61791	3.5e-06
OSBPL7	1.6169	0.00188527
GGCT	1.61669	0.0096592
ALDH1L1	1.61579	0.0242364
RPL7L1	1.61517	6.93e-07
PPOX	1.61498	0.000943881
ADCK1	1.61478	0.00102393
KLRAP1	1.61477	0.00810716
C9orf85	1.61369	6.43e-06
SMOC1	1.61264	0.0705926
FAM106A	1.61263	0.0101171
GCA	1.61192	0.00400827
LPP	1.61179	1.39e-05
HSPA1L	1.61144	0.000182596
TAS2R14	1.60985	0.00142276
ALKBH2	1.60885	3.96e-05
HOXB2	1.60825	0.00415335
LOC100289230	1.60692	0.00106672
CREBZF	1.60651	1.85e-05
TYRO3P	1.60361	0.00085997
POLR3F	1.60293	6.37e-05
TMEM25	1.60273	0.0296594
HNRNPA1L2	1.60261	5.23e-07
MORN2	1.60226	0.000958058
SPATA6	1.60224	2.5e-05
PCDHB2	1.60212	9.91e-05
PMS2P4	1.60181	0.000821561
ATP5F1	1.60181	1.41e-06
C18orf8	1.60165	0.000105829
PARP16	1.60148	4.68e-07
TM2D3	1.60131	0.000833266
C15orf41	1.601	5.5e-05
LAT	1.60091	0.00856034
MAP4K4	1.60058	0.000176987
EPHA7	1.60048	0.0610668
C12orf75	1.59906	0.0306906
AGER	1.59893	0.000743363
IGF2BP2	1.59778	0.000376197
DPM3	1.59696	0.00930405
HSD17B14	1.59559	0.0219476
SLC9A3R2	1.59481	0.00455597
SNHG12	1.59443	0.00351482
PLD2	1.5943	0.000305617
LOC100506207	1.59357	0.000490637
HRCT1	1.59356	0.0295506
NDUFB7	1.59353	0.000269149
TXNIP	1.59251	0.00263085
CAPN2	1.59249	1.84e-05
SLC39A14	1.59119	0.0440111
GOLGA8B	1.58991	0.0040596
APITD1	1.58972	0.000270332
SPON1	1.58939	0.000189516
LOC100505648	1.58916	0.000157039
SPARCL1	1.58836	0.000299627
GLDN	1.58832	0.0152482
PQLC1	1.58778	0.000291105
ARRB1	1.5873	0.000625811
MDN1	1.5871	2.25e-06
NPIP	1.58635	0.00584314
PTGR1	1.58629	0.000159428
CDK3	1.58624	0.000209247
NBPF11	1.58608	3.66e-06
SNORA21	1.58594	0.00349774
SSPN	1.58556	0.00118878
RNF144B	1.58533	0.000977634
ZNF880	1.58529	0.000378913
TMEM97	1.58525	0.00782799
RBM6	1.58509	7.68e-06
PTPRT	1.58337	0.0807992
ANKRD39	1.58262	6.31e-05
VSTM4	1.58208	4.71e-07
SLC2A13	1.58148	5.49e-05
CCDC130	1.58145	3.07e-06
UQCRC1	1.58042	0.00410339
C6orf57	1.57794	2.06e-05
REEP1	1.57687	0.0598982
MAGI3	1.57661	0.000331192
PTPLA	1.57655	0.0198464
NT5C2	1.57634	2.03e-05
SSR4P1	1.57571	0.00236094
ORC2	1.57544	0.00381225
TET2	1.57484	0.000196057
ENOSF1	1.57471	4.5e-05
FAU	1.57415	1.22e-07
EIF3G	1.57344	7.91e-09
ZNF613	1.57307	0.0136339
SRGAP1	1.57254	2.42e-05
C21orf119	1.57242	0.0013789
PFN1P2	1.57239	0.000734516
ST8SIA4	1.57151	0.0170098
LMOD1	1.57133	0.00434289
CLASRP	1.57092	3.11e-06
ABCB1	1.57036	0.016234
NEURL4	1.56967	0.000126253
ANXA3	1.56952	0.0155378
C16orf3	1.56875	0.01351
TCEB3C	1.56855	0.0402916
AMOTL1	1.56827	0.000146044
HRAS	1.56799	0.00119682
LOC648987	1.56775	0.000121724
ZNF621	1.56748	1.39e-05
RRAGC	1.56696	3.59e-08
ACOT2	1.56667	0.00278844
KLRC4	1.56633	0.094478
CNKSR2	1.56588	0.0111663
COG7	1.56468	5.63e-05
PPP1R3E	1.56456	4.21e-05
EDA	1.56437	0.00771233
TRHDE	1.56402	0.00243706
C21orf58	1.56389	0.0265355
ZNF14	1.56382	1.63e-06
RAMP2-AS1	1.56226	0.0128521
TNFRSF14	1.56185	0.000671689
SUGP2	1.56124	0.000283479
LOC100630923	1.55967	0.00220452
CCDC144B	1.55963	0.0667595
ZNF879	1.55913	0.000319828
GUSBP3	1.55828	5.18e-05
C5orf44	1.558	1.97e-06
SCAI	1.5577	0.000102403
SNORA52	1.55715	0.00363845
ENTPD3	1.55606	0.0505818
PRKG2	1.55596	0.0644852
MAP1A	1.55593	0.00346602
ZNF639	1.55564	5.79e-08
C11orf92	1.55537	0.018006
IFT81	1.55522	0.00304349
ZNF615	1.5546	6.56e-06
EPAS1	1.55427	0.00250746
PATZ1	1.55356	1.36e-05
SLC25A18	1.55202	0.0734135
PGS1	1.55039	2.3e-05
ZNF594	1.54936	0.0119331
LOC100190986	1.54901	0.000610563
LOC284578	1.54677	0.0758774
VARS2	1.54654	2.55e-08
PHB	1.54645	1.17e-06
EVC2	1.54627	0.000178973
TUFM	1.54594	0.000125802
ZFP112	1.54579	0.00290359
PAPOLG	1.54555	2.34e-05
SAP30	1.54491	1.98e-05
AGAP2	1.54441	0.0128307
GPATCH2L	1.54344	1.84e-05
PRORSD1P	1.54327	0.0147212
RNF5	1.54223	0.000622325
ANKRD10	1.54198	2.52e-07
PCDHGA2	1.54178	0.0151104
GFRA1	1.54138	0.00199625
IFITM4P	1.54108	0.0345372
LOC728407	1.54107	0.000175705
FAM171B	1.54095	0.000437684
DNAJC9	1.54069	9.46e-05
TAF10	1.54055	0.000622243
SLC38A11	1.53992	0.0714399
GPT2	1.53901	0.0144651
CMC4	1.53839	0.000854431
RPS26	1.53812	0.0114673
ALDH7A1	1.538	1.41e-05
TYW1B	1.53793	0.018349
SWT1	1.53737	1.75e-05
SLC2A6	1.53737	0.014163
SNORA43	1.53728	0.00100198
VMAC	1.53707	0.00480903
GAS5	1.53659	0.000605301
SCARNA6	1.53632	3.58e-05
SLC19A3	1.5352	0.0238937
SNORA63	1.53437	0.000286526
FAM219B	1.53429	0.000128123
NUDT16	1.5336	0.00172917
EML3	1.53349	0.000192939
TAS2R19	1.53315	0.00199014
KIAA1468	1.53284	8.09e-06
SNHG8	1.53189	0.00122667
SNORA24	1.53089	0.0048698
GTF2H2C	1.53073	0.00254246
SCN2B	1.53061	0.083416
SNORA30	1.53037	0.00236466
SERP2	1.52999	0.0198542
HIST1H4B	1.52956	5.43e-05
IL17RC	1.52931	0.0123302
ADCY4	1.5291	0.000669745
PCDHGB8P	1.52898	0.00250949
NIPSNAP3B	1.52878	0.0464796
LOC100506469	1.52873	0.013036
CAMK2G	1.52773	0.000253886
KDELC1	1.52746	0.00790216
DHRS7	1.5272	1.5e-06
RNF157	1.5266	0.0475355
THADA	1.52606	6.12e-05
C15orf62	1.52543	0.000593075
PPIL3	1.52533	0.000214156
LRRC10B	1.52487	0.0702882
EGFL8	1.52483	0.00079517
SLC25A29	1.52456	0.00013596
SNORA31	1.52434	9.57e-05
NPRL2	1.52356	0.000994339
FST	1.52337	0.0120253
RCOR3	1.52307	3.24e-06
AACS	1.52195	0.0358876
ANKRD28	1.52182	1.3e-07
CCDC144A	1.52006	0.0841653
RPL23AP82	1.5185	0.000172188
PODN	1.51842	0.00124746
ZNF337	1.518	0.000933481
COPS5	1.51775	9.37e-05
SNTB1	1.51774	2.68e-05
SCARNA3	1.51772	0.0421947
SEMA3A	1.51737	0.0277465
ZNF317	1.51729	6.02e-05
EGFEM1P	1.51567	0.0573994
NUP85	1.51563	2.56e-06
NES	1.5153	0.00329205
APMAP	1.51516	0.000195806
LCORL	1.51485	1.44e-07
GAS8	1.51408	4.54e-06
ABR	1.51282	0.00426742
FOXN2	1.51253	0.00104294
NRGN	1.51229	0.0620298
CARD6	1.51224	0.000163646
SMCR7L	1.51218	1.62e-05
STX16	1.51214	1.73e-06
ZNF141	1.51201	0.000207745
DNAJC17	1.51142	7.45e-05
ALDH1B1	1.51142	0.00072256
ZNF81	1.51108	0.0158485
CYCS	1.51094	0.00109701
NRM	1.51094	0.0107531
ARRDC3	1.51092	0.000136175
ZNF440	1.51028	0.00450864
TEKT4P2	1.50984	0.0348034
AEBP1	1.50931	0.00797637
PDCD6IP	1.50916	0.00571444
SNORA5A	1.50914	0.0028565
PEX12	1.50911	0.0001917
SFR1	1.509	0.000564631
SCARNA15	1.50828	0.0271956
KPNB1	1.50826	1.46e-05
CMTM8	1.50784	0.00835066
CCNB1IP1	1.5076	0.00015876
BOK	1.50687	0.0102122
TMSB4X	1.50676	0.000983528
ZNF446	1.50663	3.44e-05
IRAK2	1.50641	0.00979698
RP9	1.50619	6.78e-06
TNRC6C	1.50541	0.00190942
SNORA12	1.50512	0.00427719
TNRC6A	1.50461	6.8e-05
ALX1	1.50448	0.056503
CDK18	1.50439	0.0738761
LSS	1.50401	0.0138472
C9orf123	1.50392	4.7e-05
OXNAD1	1.50391	0.000403109
NEDD8	1.50387	1.41e-05
PTCH1	1.50342	8.44e-06
APOOL	1.50333	0.000194051
PHKA1	1.50318	0.0388391
ARL3	1.50297	2.09e-07
MUM1	1.50247	5.7e-07
CCS	1.50211	0.00032372
TAS2R5	1.5021	0.0367538
SNORA79	1.50187	0.00707436
RPS9	1.50164	0.000119399
JMJD7	1.50148	0.0115867
ZNF785	1.50122	0.000222087
TNFSF10	1.50101	4.89e-05
C17orf67	1.50077	0.00513299
CLEC2B	1.4995	8.32e-05
FAM176C	1.49944	4.21e-05
FSIP1	1.49886	0.0203593
CYP4F12	1.49878	0.00933954
ZC2HC1A	1.49767	1.74e-05
IRX3	1.49744	0.00174853
TAF9B	1.49739	9.67e-08
PSPC1	1.49702	0.00293958
ACYP1	1.49682	0.000166393
SATB1	1.49556	0.000624255
ESCO1	1.49445	0.000909049
LOC100129917	1.49369	0.0139263
TCIRG1	1.49355	0.00145349
CTH	1.49311	0.0317587
NET1	1.49304	0.0109168
SNORA49	1.49291	1.97e-06
YWHAG	1.49259	0.00955988
BAG2	1.49254	0.000774989
HADH	1.49242	0.0110286
MRPS18C	1.49237	0.000234073
NUP155	1.492	5.06e-05
DGKH	1.4919	0.000369484
C1orf115	1.49189	0.000898916
ZDHHC15	1.49152	0.0120516
PABPN1	1.49122	3.67e-05
BARD1	1.49111	0.00502203
MTMR9LP	1.49098	0.00210683
SNORA71A	1.49053	0.00581772
ZNF573	1.48943	0.000375353
MKNK1	1.48878	0.0045057
MAST2	1.4879	9.59e-05
GLTSCR2	1.48757	5.27e-07
SUV420H2	1.48756	0.00453929
FLT1	1.48737	0.00121077
PCDHGA9	1.48717	0.0040265
GOLGA6L9	1.48715	0.0298973
GRAMD1A	1.48664	0.00036866
TJP2	1.4862	0.000225984
ZNF484	1.48603	6.3e-06
RAB40C	1.48596	0.000400578
PRKAG2-AS1	1.48569	0.00227215
FBXW4P1	1.48548	0.00464163
C3orf32	1.48485	0.0831108
NENF	1.48478	3.71e-07
FAM165B	1.48442	9.64e-07
DKFZP434I0714	1.48438	0.00581414
BIVM	1.4841	1.2e-05
NMI	1.48398	0.000688826
CCBP2	1.48388	0.0239747
LOC100505875	1.48386	0.0724855
SNORA70	1.4837	0.00510234
COX14	1.48337	0.0270281
BEND5	1.48336	0.000957815
GPR160	1.48316	0.0142948
TAF8	1.48312	0.000677689
NR3C1	1.48294	0.000281971
SPIN3	1.48267	0.00105365
RPL3	1.48266	1.32e-06
GLG1	1.48266	2.42e-05
CROCCP3	1.48258	0.00691501
SUMF1	1.48254	3.65e-05
ZNF44	1.48026	0.000391548
AGAP5	1.48017	0.00354241
SYNE2	1.48016	3.81e-05
MRPL27	1.48004	0.00292432
POC5	1.47997	0.000193246
ZNF34	1.47963	2.15e-06
S100PBP	1.47947	0.000342764
CCT2	1.47919	0.000207588
SCARNA7	1.47894	2.26e-05
PC	1.47788	0.0553338
ZCCHC11	1.47745	0.000113896
LOC338799	1.47702	0.0349532
NBPF24	1.47689	0.000215676
TMEM136	1.4768	0.0171316
ACSS3	1.47656	0.0201082
LY6G5B	1.47645	0.00376545
ARMCX3	1.47614	0.00128808
PARK2	1.47606	0.00893546
PHF15	1.47603	0.000303867
SNRPD2	1.47517	2.16e-06
MTA1	1.47505	3.94e-09
PPT2	1.47504	3.9e-05
FAM125A	1.4749	0.000169428
NME4	1.47471	0.0252113
RNF144A	1.47373	0.00127706
THOC3	1.47342	0.00864943
TAS2R3	1.4731	0.037629
GTF2H1	1.47293	3.15e-08
MLPH	1.47261	0.0109162
TIMP4	1.47251	0.0118333
PAOX	1.47244	0.00119134
ZNF3	1.4723	1.47e-06
ACCS	1.47226	0.0275061
ZNF682	1.47205	0.00602886
CYB5RL	1.47204	0.00332751
KLHDC10	1.47146	0.000576342
LAMB1	1.47131	0.00842422
FLJ11235	1.47124	0.00846354
LOC641367	1.47115	0.0336417
CWC15	1.47062	1.11e-06
PIK3R1	1.47009	0.00419331
PNPO	1.47003	0.00281721
MON1B	1.46992	0.00127424
SNORA16A	1.4698	0.000165756
C12orf45	1.46915	3.14e-05
UQCRBP1	1.46894	0.0310134
NAPRT1	1.46888	0.000189979
ERI2	1.46878	0.000323588
RNF180	1.4687	1.78e-05
NUP37	1.46853	4.56e-05
ZBTB49	1.46802	0.00451387
IL18BP	1.46801	0.00559285
MBOAT1	1.46727	0.00158117
RIMKLB	1.46723	0.000392219
CLDND2	1.4669	0.0190151
MTDH	1.46685	0.000106906
FAS	1.46637	0.00871784
LIAS	1.4657	0.00313892
ZNF606	1.46561	0.0022972
CCDC138	1.46554	0.000318112
PPP1R7	1.46531	9.43e-06
MZT2A	1.46517	0.00677322
PNN	1.46516	5.54e-05
EHD3	1.46413	0.0205798
ASAP3	1.46406	0.000199165
QRICH1	1.46398	3.54e-05
CCDC103	1.46313	0.0082505
TASP1	1.46292	0.00476729
MOB3B	1.46288	0.00973727
ZNF18	1.46256	0.000347441
KIT	1.46255	0.00490851
IPW	1.46233	0.00376883
ECI2	1.46215	0.000264189
NEK1	1.46208	4.44e-06
EEF1B2	1.46115	0.000456928
DCAKD	1.4607	0.0424622
ZNF155	1.46061	0.0369971
LOC100303749	1.46	0.0146452
COMTD1	1.45981	0.0187857
CEP72	1.45973	0.00117088
CROCCP2	1.45929	0.0259553
SOX4	1.4587	0.0162654
MARS2	1.45805	0.00522489
DDIT4	1.45784	0.0182328
VCPIP1	1.45682	1.4e-06
ZCCHC14	1.45667	6.09e-06
KCNA4	1.45634	0.0684411
SNORA71D	1.456	0.00587593
PMS2CL	1.45567	0.00110493
SNORA46	1.45504	0.0139817
SPCS1	1.45496	6.37e-05
FGD6	1.45448	0.000686966
LOC145783	1.45422	9.81e-05
FLJ46906	1.45407	0.00651266
B3GAT3	1.45355	0.00178304
MEIS2	1.45317	1.23e-05
EDC4	1.45276	0.000214584
ANKRD53	1.45222	0.0840217
ISOC2	1.45219	0.00424732
NISCH	1.45194	1.39e-05
CCNG2	1.45171	0.00389826
MAPK14	1.45158	1.63e-08
POLL	1.45103	0.0382112
CHD2	1.451	6.39e-07
AQP7P1	1.45095	0.087407
GATA3	1.45055	0.0294772
RPS5	1.45046	8.56e-06
OSTF1	1.45044	4.67e-05
HNRNPC	1.45038	6.51e-06
MRPL4	1.45033	0.000422504
FAM76B	1.45027	8.22e-05
SIRT3	1.44999	0.00145288
ZNF76	1.44979	0.00526351
SEMA4G	1.44898	0.0939285
PCDHGB2	1.44864	0.0226625
QSOX2	1.44844	0.0132546
LOC255512	1.4483	0.0430329
MED31	1.44801	1.75e-06
ST13	1.4478	6.24e-05
WDR27	1.44775	0.00496871
GNGT2	1.44714	0.0317952
MOV10	1.44698	3.69e-05
TAF4B	1.44696	0.00105163
HOXD-AS2	1.4468	0.0159958
TMEM120B	1.4464	0.0422554
FAM192A	1.44632	2.58e-06
RABL3	1.44625	9.08e-05
DYM	1.44615	1.76e-07
MIRLET7BHG	1.44603	0.080762
BCKDHA	1.44588	0.00573334
MLLT6	1.44554	5.37e-07
DLEU2L	1.44538	0.0168161
SEH1L	1.44522	0.000489531
RMRP	1.44521	0.00017662
CTTNBP2	1.44501	0.012088
LOC100506730	1.44489	0.00427592
TSR2	1.44486	8.37e-05
GCAT	1.44479	0.0148484
DKC1	1.44413	9.19e-05
TTLL7	1.44397	0.0268979
INTS6	1.44374	0.000612319
DNAH1	1.44327	0.00456961
ATRIP	1.44254	0.00136775
CA8	1.44246	0.0492688
ZNF622	1.44194	5.27e-05
LOC100131564	1.44189	0.0407992
RPRD1A	1.44138	0.000120105
PPIG	1.44104	0.0001
ATHL1	1.44099	0.00960576
C21orf2	1.44096	0.0119173
TFAP4	1.44096	4e-05
ZNF10	1.44084	0.00966925
GEMIN8	1.44075	3.03e-05
LIME1	1.44057	0.0347273
RIC8B	1.44024	0.000114564
RPL39	1.43993	0.000320845
ZNF37BP	1.4395	8.09e-05
ST6GALNAC1	1.43948	0.0835094
TSPAN1	1.43877	0.0799927
DNPEP	1.43877	5.26e-05
DHTKD1	1.43876	0.000733703
SLC7A5P2	1.43873	0.000853394
ZNF470	1.43872	0.000843007
XYLB	1.43815	0.00074921
MRS2P2	1.43793	0.006968
MFSD8	1.43791	1.12e-05
RIC3	1.43774	0.0481762
CCNF	1.43734	0.0448175
ANKMY1	1.43729	0.00279226
FHL5	1.4372	0.0778604
TMEM242	1.43712	0.00027905
SLC5A4	1.43708	0.0608215
CTDSPL2	1.43683	0.000169287
SNORA64	1.43666	0.0668586
ZFHX4	1.43656	0.00423639
ATP6V0E2-AS1	1.43652	0.0629996
USP28	1.43645	6.4e-06
CYB5R4	1.43643	0.00703322
C1QTNF1	1.43641	0.00759977
P2RY12	1.43639	0.0437451
UGCG	1.43634	0.0192427
LOC100271836	1.43612	0.000493714
CBWD6	1.43572	0.0151466
CHCHD10	1.43551	0.0197504
C16orf88	1.43532	2.49e-06
PLA2G6	1.4349	0.0168138
LINC00312	1.43481	0.00347001
ADAM33	1.43446	0.0155657
ZNF274	1.43445	0.000451445
LINC00597	1.43429	0.0169361
RASSF1	1.43423	0.0124577
PTRH1	1.43421	0.00752134
TTC12	1.43418	0.00145979
HIST3H2A	1.43388	0.0815805
BUD13	1.43383	6e-06
CDC26	1.43321	5.64e-06
C20orf111	1.43292	1.47e-06
ZNF419	1.43283	0.0842393
JMJD6	1.43264	0.0014344
USP5	1.43222	0.00826204
LOC100505738	1.43171	0.000233309
C2CD4C	1.43129	0.0887142
ICOSLG	1.43127	0.00525326
IPO9	1.43123	0.000255491
ISY1	1.43097	1.05e-07
RFXAP	1.43087	0.000386647
TTC8	1.43066	0.00116139
CSAD	1.43051	0.00452639
SMAD9	1.4304	0.00344059
PSMD7	1.43028	0.000301984
RCL1	1.43025	0.0132953
PLEKHA6	1.43021	0.0613885
LSM6	1.43017	0.000543617
SOX13	1.42998	0.00132869
LINC00265	1.42998	0.000731906
KLF5	1.42986	0.0465506
USP49	1.4298	0.00364199
CELF2	1.42979	0.000280659
C11orf74	1.42974	1.29e-05
ZNF569	1.42874	0.000451985
ORMDL3	1.42871	0.0399586
BAIAP3	1.42793	0.0705203
CNOT3	1.42782	0.00039964
ADRBK2	1.42769	0.0036362
NEK3	1.42688	0.00958717
OCEL1	1.42653	0.00787426
PAIP2B	1.42645	0.0103429
PDIK1L	1.4259	0.00954051
RPS6KL1	1.42573	0.0377081
WASF3	1.42569	0.00845604
MTHFD1	1.42513	0.00344825
DONSON	1.42505	0.0120616
ZNF425	1.42473	0.00340751
LOC90246	1.42468	0.0289555
FAM190A	1.42465	0.000931822
SACS	1.42396	3.08e-05
BOC	1.42374	0.0031151
TRAK2	1.42366	4.6e-07
MAN2C1	1.42359	0.00129692
USP37	1.42353	8.5e-06
ZNF696	1.42351	0.0117089
ZNF383	1.42343	6.98e-08
SEPT7P2	1.4231	7.9e-05
FAM124B	1.42278	0.0467817
FBXO48	1.42272	0.00210904
LOC646471	1.42266	0.00657072
SLC30A4	1.42233	1.14e-05
ANKZF1	1.42189	0.000165685
NUP133	1.42181	0.000580481
FHL1	1.42166	0.0447239
ASNSD1	1.42161	2.25e-05
CTRL	1.42149	0.0140987
PRX	1.42142	0.00130536
NASP	1.42137	0.000371161
ATP7A	1.42131	0.000245988
AKR1B1	1.42107	0.00603979
LRRN4CL	1.42097	0.0238257
MTPAP	1.42077	0.000154824
ITPR3	1.42069	0.00951244
LOC100506123	1.42063	0.0314144
SNORA77	1.42024	0.00381184
ARHGEF26	1.42021	0.0894994
DDX11	1.41978	0.0427116
HGF	1.41975	0.0158984
RDX	1.41957	7.57e-09
BCL7B	1.41952	0.00700094
TAS2R13	1.41927	0.0274571
DPH1	1.4192	0.000112789
SREBF2	1.41896	0.00141237
SCAMP1	1.4188	0.000118232
TAGLN	1.41877	0.0385154
MSANTD4	1.41873	0.00108726
PCYOX1L	1.41843	0.000501922
ICA1	1.41842	1.73e-05
ZSCAN18	1.41823	0.000343397
METTL2B	1.41797	0.00214426
GAN	1.41796	5.04e-05
RAVER2	1.41791	0.000503966
C2orf42	1.41787	0.00016194
PMS2P5	1.41763	0.00324752
TMTC4	1.41736	0.00701176
CPSF7	1.41697	2.95e-05
FAM117B	1.41691	0.00211743
WNT11	1.41685	0.00838054
EXTL3	1.4168	0.0291172
ACTL10	1.41652	0.056575
HOXA1	1.41651	0.0346631
TMEM80	1.4165	0.000404849
BTC	1.41649	0.0304808
SLC25A40	1.41642	3.93e-05
SMAD2	1.41627	3.2e-07
ZFP62	1.41624	0.0259552
TPM3P9	1.4157	0.00431398
SNORA84	1.41563	0.0163015
PAPD5	1.41558	0.00132789
SUDS3	1.41548	0.000147336
RPS3	1.41477	0.00337245
SNORA74A	1.41476	0.00177451
TM7SF2	1.41463	0.0902549
TMEFF1	1.41411	0.0090207
TRMT5	1.41373	0.00159939
PCDHB11	1.41371	0.0151308
ADAM1A	1.41361	0.00207222
MRPS9	1.41336	2.07e-05
C2orf68	1.41312	0.00115995
BBS9	1.41283	6.6e-06
SAPCD1	1.41278	0.0310127
FGF12	1.41238	0.0470265
CCBL1	1.41236	0.0305935
SLC25A22	1.41199	0.0224331
PIGM	1.41186	0.00123923
SENP6	1.41175	4.31e-09
PIN1	1.41172	0.00110803
TMEM79	1.41158	0.00353682
LOC100132352	1.41154	0.0207927
PSMB7	1.41151	4.02e-05
ZNF23	1.4114	0.00120836
PID1	1.4112	0.00527507
LOC285074	1.41106	0.00260864
RPL18A	1.41079	2.52e-05
MYO15B	1.4102	0.0107822
RPL5	1.41011	8.3e-05
EFCAB11	1.40993	0.00799271
RPS2	1.40966	0.00110693
RASSF3	1.40948	0.00463904
PDCD1LG2	1.40938	0.000641011
ECH1	1.40918	0.00401864
MAML3	1.40916	0.0119913
ALAS1	1.40898	0.00465827
TBC1D8	1.40888	0.00157259
RBM19	1.40873	3.1e-05
RPL38	1.40852	4.11e-06
MFSD6	1.4085	0.00991833
CSDA	1.40838	0.00051944
MRPS22	1.40828	1.11e-05
KAT2A	1.40819	0.00953354
BCAS3	1.40804	0.000178924
AP4B1	1.40797	0.00532679
PTK2	1.40783	0.000149338
BOLA1	1.40776	0.00370407
NPHP3	1.40758	0.00140671
TEX10	1.40738	0.0016989
DCTN6	1.40735	5.22e-06
DKFZP586I1420	1.40729	1.5e-05
ATP5L2	1.40706	0.00945532
RAPH1	1.40671	0.00135857
CTSO	1.40654	0.00247046
FAM48A	1.40649	0.005111
ZBTB44	1.40627	1.29e-05
LAMTOR5	1.40617	0.00036
NKAPP1	1.40602	0.00822969
FANCE	1.40599	0.0247055
ZXDA	1.40592	0.000162739
DNM3	1.4056	0.0130411
ACTL6A	1.40503	0.000827677
ENGASE	1.40466	0.0030466
WDR48	1.40452	9.64e-06
PCCA	1.40431	0.00117069
RANBP1	1.404	9.83e-06
ING1	1.4038	0.0115013
DDX1	1.40369	0.000485811
PRCD	1.40358	0.0861047
STK10	1.40352	0.0154606
PRR13	1.40333	0.000476106
C14orf101	1.40324	7.8e-05
TSPYL4	1.4031	0.000693619
GTPBP6	1.4029	3.99e-05
ASB9P1	1.40289	0.0688026
VEZF1	1.40286	0.000850185
GNPAT	1.40256	4.23e-06
PTGIS	1.40214	0.0703705
PSMC3IP	1.40201	0.00662074
TBX2	1.40196	0.00711532
AMIGO2	1.4019	0.0280318
TMEM81	1.40178	0.00539108
CRLS1	1.40178	0.00224386
LMO3	1.40163	0.0350155
MIA3	1.40137	0.000333575
C3orf33	1.40134	0.00541088
FBXL6	1.40124	0.00360949
LOC100506795	1.40113	0.0228793
PACRGL	1.40077	0.00881294
ZNF175	1.4007	7.6e-06
GUSB	1.40067	0.00407578
RPA4	1.40067	0.0712535
RXRA	1.40035	0.000408106
EIF4E2	1.40001	0.00279892
SBNO1	1.39981	3.14e-05
UBE2W	1.39956	0.000983202
ETFB	1.39953	0.00345801
PPP6R2	1.39952	0.00013707
SERBP1	1.39925	3.43e-05
TIMMDC1	1.39887	0.00201928
KAT6A	1.3988	0.000195237
TRNP1	1.39803	0.0387511
ALG1	1.39766	0.0013148
THRA	1.39718	0.0015998
RABL2A	1.39706	0.0165713
UBL7	1.39703	0.0225845
PTS	1.39669	0.00685387
HSD17B7P2	1.39652	0.0309539
AUP1	1.39576	3.33e-05
MRPL21	1.39572	0.000233495
C6orf226	1.39538	0.00705135
NDUFA6	1.39536	0.000499802
TSPYL6	1.39525	0.0191519
SH3BP5L	1.3949	0.00626497
NOL12	1.39484	0.000207694
SGIP1	1.39464	0.0186713
LUC7L3	1.39461	0.0100653
RNPEP	1.3945	0.000952747
BTN2A3P	1.39445	0.0180336
RAB3GAP2	1.39441	0.000311624
LOC100131096	1.39419	0.0955518
CNBP	1.39357	1.49e-07
TMEM42	1.39354	0.006997
RPL36	1.39339	0.000551928
LOC100506451	1.39334	0.0181777
POLM	1.39328	0.0149429
PRPSAP1	1.39328	1.09e-05
CLCN4	1.39322	0.029747
IL17RE	1.39322	0.0827661
LOC553103	1.39293	0.0132569
SOGA1	1.39289	0.00313616
IFI27	1.39287	0.0131025
UTP18	1.3928	0.000391004
PSKH1	1.39279	5.97e-05
MST1	1.39257	0.026301
PINLYP	1.39217	0.00763184
FAM60A	1.39212	0.00488332
DOCK9	1.39174	0.00180232
SNORA34	1.39132	0.0175447
IFNGR2	1.39115	0.000155909
RAF1	1.39096	8.63e-05
VEGFB	1.3909	0.0117169
ADCK5	1.39041	0.010034
SF3A2	1.39031	0.00223101
ZNF513	1.38964	0.00142788
ARHGEF7	1.38948	0.000638985
KANSL3	1.38915	0.00148099
ABCD4	1.38908	7.37e-06
KHDRBS3	1.38884	0.00174762
UBE4B	1.38818	0.00100614
OMA1	1.38817	0.00456243
SNRPG	1.38817	0.000345729
FBF1	1.38803	0.0331051
BAZ2B	1.3879	9.66e-05
LGALS3	1.38768	7.38e-05
MRPL1	1.38763	0.00123681
SLC25A3	1.38738	3.27e-05
NDUFB2	1.38734	0.000611302
MLL3	1.38661	6.74e-05
JDP2	1.3861	0.0362581
LONRF1	1.38589	0.0746104
ARHGAP12	1.38569	0.000151223
EDF1	1.38517	1.04e-06
CROCC	1.38514	0.0052533
LRFN5	1.38513	0.0613723
TOP3A	1.38511	0.000640768
MYO18A	1.38478	0.000943373
BAG6	1.38469	3.94e-05
PCK2	1.38408	0.0750652
DEPDC5	1.38403	0.000976945
MANEA	1.38402	0.000282707
MREG	1.38395	0.0186152
LMBR1	1.38393	0.00045117
SSSCA1	1.38385	0.00748191
PRPF38A	1.38379	5.31e-06
LPAR6	1.38336	0.0196743
USO1	1.38316	0.00048141
NEK9	1.38307	0.000556379
LOC100270746	1.3828	0.0718201
ACAP3	1.38253	0.000622009
TBX3	1.382	0.00765185
HIBCH	1.38154	0.000417276
LUC7L2	1.38148	5.14e-07
PBX2	1.3814	0.000270076
TRIO	1.3813	5.55e-06
ANKRD13B	1.38069	0.0185511
KIAA0753	1.38066	0.00225758
MOB3A	1.38038	0.00882726
NCAPH2	1.38032	1.72e-05
C11orf57	1.38019	8.9e-06
CCDC48	1.38019	0.0203427
ANKRD17	1.37995	0.000101724
CSNK1E	1.37967	1.54e-05
RAB33B	1.37951	0.000439788
ZSWIM7	1.37928	0.000259151
RPL26L1	1.37927	3.64e-05
LOC728024	1.37926	0.0386671
RBPJ	1.37915	4.89e-05
TRAP1	1.37904	0.0011655
ZFPM2	1.37899	0.00328986
ZBTB46	1.37874	0.0412423
CCDC89	1.37868	0.0746519
RPS19BP1	1.37864	3.41e-05
ADSS	1.37862	0.000173968
TIMM13	1.37856	0.00141266
ABCB10	1.37851	5.27e-05
ESAM	1.37835	0.00378072
LYSMD2	1.3783	0.0324796
NTHL1	1.37785	0.00555907
TARBP1	1.37772	0.000104833
GTF2E2	1.37709	0.000768461
APOD	1.37693	0.00824964
NPM1	1.37684	9.46e-06
HIF3A	1.37655	0.0863767
PIBF1	1.37652	0.000553286
C5	1.37649	0.0259292
CENPL	1.37617	0.0387868
HNRNPA1	1.37612	0.000321532
SGSM3	1.37593	8e-05
HSPE1	1.37581	0.00204313
ZNF512	1.37579	6.71e-06
RPP38	1.37567	0.00531323
TSR1	1.37542	0.00337374
F3	1.37439	0.0654335
SUGP1	1.37414	0.000480701
MICAL3	1.37409	0.0347573
NVL	1.37381	0.000291214
B3GNT1	1.37309	0.000359783
NOL3	1.37297	0.016597
PSMC5	1.37289	6.64e-05
HMGN2	1.37283	2.71e-05
RBM33	1.37283	2.27e-05
LOC643733	1.37258	0.0378446
LRRC23	1.37226	0.00283493
DIRC2	1.37224	0.00291001
EPB41L4B	1.37221	0.098104
RNF113A	1.37214	7.07e-05
C6orf108	1.37186	0.00778993
RPL7	1.37184	0.000100582
PWP2	1.37181	0.000947228
GPN1	1.37155	0.00223939
POLD3	1.37126	0.00199515
ZNF346	1.37122	0.00107464
RPL35	1.37084	0.000124473
CPEB1	1.37049	0.0706814
PTENP1	1.37027	0.0259443
RPL13A	1.37018	2.12e-05
SMARCC1	1.3697	7.21e-05
ZNF33B	1.36964	6.02e-05
GPATCH1	1.36934	0.00238811
B4GALT7	1.36867	0.002107
SNRNP48	1.36861	0.000251974
ZNF460	1.36861	0.00073609
POC1B	1.36832	0.00293272
HIST1H2BG	1.36821	0.0777292
RBBP8	1.36816	0.00571684
C11orf1	1.36783	0.056899
BCL6	1.36777	0.00192318
CBLB	1.36764	0.0172916
NIPSNAP3A	1.36753	0.000705637
ZC3H15	1.36742	6.67e-05
MRPS31	1.3674	0.000858873
MAP3K5	1.36729	0.0652911
PSME1	1.36725	6.3e-05
KCNAB1	1.36703	0.0261391
ZNF266	1.36671	0.000602686
ALKBH6	1.36644	0.0322038
BRF2	1.36643	0.000747156
TENC1	1.36625	0.00669565
NCOA2	1.36595	0.000775786
GRHPR	1.36558	0.00104507
IL3RA	1.36508	0.00946483
HNRNPR	1.36508	1.25e-05
POLR1C	1.36506	0.000504363
BBS7	1.36473	1.97e-05
MEIS1	1.36453	1.65e-05
C11orf31	1.36443	0.00112553
PYCRL	1.36431	0.0137582
ELAVL1	1.36424	0.000161152
URI1	1.36418	3.54e-05
RASSF7	1.36416	0.0410898
PA2G4P4	1.36413	0.0807707
SAR1B	1.3641	0.00258467
LOC728554	1.36396	0.0407417
FLJ10038	1.36394	0.00642909
MKS1	1.36383	0.00105602
ELMO3	1.36381	0.0375596
UBL4A	1.36374	0.000554969
CUL5	1.3635	7.64e-10
C1orf35	1.36309	0.000360735
C4orf27	1.36273	2.09e-05
LIMA1	1.36221	0.0002824
ANKRD11	1.36218	1.71e-06
EIF2B5	1.36214	0.000286631
LINC00478	1.3618	0.0107613
OXCT1	1.36171	0.0248919
SAMM50	1.36165	0.00563025
COG2	1.36139	0.000338357
SARS	1.36128	0.000147087
ARMCX2	1.36111	0.00727373
ZNF232	1.36098	0.0287283
NUP160	1.36067	1.63e-06
ACADSB	1.36046	0.00421042
ARSG	1.36024	0.0310908
FLYWCH1	1.36023	0.00220944
OTUD3	1.36006	0.0146352
POLE	1.35996	0.00223112
ABHD16B	1.35995	0.0304309
ZNF276	1.35973	7.05e-05
PHF8	1.35965	0.0233962
DYNLL2	1.35956	0.000547624
LOC550112	1.35934	0.0135386
ARV1	1.35914	0.000946689
NUPR1	1.35905	0.00452227
MAP4K2	1.35903	0.0208981
RALY	1.35869	0.000323692
SMAGP	1.35828	0.0132143
MEIS3P1	1.35822	6.2e-05
PHF7	1.35821	0.0281011
LOC100130992	1.35733	0.0193479
LONP2	1.35727	8.56e-06
TIPIN	1.35715	0.00720582
ZDHHC9	1.35671	0.00530591
ELP4	1.35663	0.000120126
SNORA2A	1.35644	0.00561512
RPL23AP53	1.35637	0.0130201
C11orf10	1.35622	0.00120088
ACP6	1.35613	0.0394601
PLCB3	1.35607	0.00625191
GLUD2	1.356	0.00425437
PBX3	1.35571	0.00230548
PHF13	1.35555	0.00149665
PCDHB7	1.35542	0.0687892
THOC1	1.35523	0.00846212
ACVR1C	1.35518	0.0643331
RABL2B	1.35489	0.00080722
CENPB	1.35476	0.000156324
GOSR1	1.35467	7.35e-05
MAPK8IP3	1.35449	0.00879482
KANSL1L	1.35404	2.27e-05
SNTG2	1.35392	0.0362022
GNL3	1.35391	2.78e-06
AEBP2	1.35389	6.76e-05
NUDT17	1.35371	0.0415708
FCHSD1	1.35357	0.00739845
ZNF782	1.35355	0.00673075
GCSH	1.35346	0.00610962
ZNF567	1.35334	0.00572728
MED23	1.35309	0.00374172
KXD1	1.35303	3.59e-05
LOC254128	1.35263	0.0135044
MLH3	1.35243	0.000166032
SFXN2	1.35219	0.0566272
FAM111A	1.35212	3.21e-05
C17orf80	1.35208	0.00932671
POLR3E	1.35191	0.000153556
UVSSA	1.35165	0.00839118
NOB1	1.35158	7e-06
PILRB	1.35147	0.0839257
ZNF583	1.35143	0.00404291
TMEM14C	1.35129	9.45e-05
NPR1	1.35124	0.0259058
LOC642852	1.35094	0.020874
METTL4	1.35077	0.00228396
ERGIC3	1.35075	0.000163698
MBTPS2	1.35067	0.000346096
YME1L1	1.35056	5.61e-05
CAMTA1	1.35054	0.0687777
GABPB2	1.35035	6.8e-05
DHCR24	1.35023	0.0701817
EIF2B3	1.35014	0.0076257
ETHE1	1.35004	0.023319
EFNA1	1.34998	0.00597113
EIF3A	1.34996	4.36e-05
MZT1	1.34978	0.0075461
PLEKHA7	1.34959	0.00820006
DENND3	1.34955	0.00178729
AGXT2L2	1.34954	0.003473
ARMC10	1.34951	9.18e-06
UFD1L	1.34946	0.000292086
PARP14	1.34901	0.00774104
NDUFB10	1.34897	0.00186183
LINC00526	1.34874	0.0274536
DUSP11	1.34873	0.000594012
PITRM1	1.34865	0.00257968
PRKAG1	1.34859	0.00100644
DYNC1I1	1.34858	0.0451314
PDCD10	1.3485	3.25e-06
RGS11	1.34823	0.0754973
LOC401397	1.34817	0.00629218
RPL34	1.34811	0.0448372
PITPNA	1.34777	0.00162932
SAMHD1	1.34749	0.0939452
APOM	1.34743	0.0226906
FBXW8	1.34726	0.0377756
TMCO6	1.34688	0.00396756
NPR2	1.34685	0.000157513
SS18L1	1.34682	0.00552433
NEIL2	1.3467	0.0311276
TAS2R4	1.34665	0.0655583
TOMM6	1.34643	0.00051136
SEPT5	1.34624	0.00309628
C1orf74	1.34621	0.0573916
CBR3	1.3462	0.0136694
KIAA1737	1.346	0.00423081
ORMDL2	1.34584	0.00728339
ZNF300P1	1.34583	0.0555755
SNHG6	1.34571	2.77e-05
HACE1	1.34568	0.000773954
ANKS1B	1.34555	0.0772439
IBTK	1.34518	0.000457581
GKAP1	1.34501	0.00846207
PCDHGA10	1.34499	0.0161703
SND1	1.34492	0.0288708
GTF2F2	1.34478	1.72e-06
CCDC101	1.34459	4.09e-05
CDR2L	1.34444	0.034119
PLEKHA5	1.34441	0.000739064
RPL30	1.34417	2.85e-05
ABCA6	1.34402	0.00467789
WDR19	1.34398	0.000661011
CD99L2	1.34369	0.00071354
RELB	1.34346	0.0245492
NAA25	1.3432	2.15e-06
LOC349196	1.34305	0.072195
RNF181	1.34295	0.00060433
RBM45	1.34291	0.0124313
EGFL7	1.34238	0.00780328
RNF114	1.34222	3.55e-05
OGFR	1.34212	0.00463034
CTSK	1.34204	0.0661118
UBXN7	1.34197	0.000546417
PCNP	1.34163	1.57e-08
METTL2A	1.34161	0.000892644
COPG2	1.34151	0.0123814
MACROD2	1.34144	0.017354
MRPL14	1.34129	0.00313443
FBL	1.34128	0.00151709
MED17	1.34109	0.000682388
IKBKB	1.34102	0.000562827
ARHGAP10	1.34025	0.00232136
UBFD1	1.3399	0.00208761
SLMAP	1.33979	0.00113223
BAZ1B	1.33941	1.04e-05
NAPB	1.33933	0.00384308
DDX60	1.33925	0.000828534
RBMS2	1.33887	0.00138993
CCDC134	1.33886	0.000478377
ZNF2	1.33885	0.00593327
TNFAIP2	1.33884	0.0532147
ZNF41	1.33867	0.00070469
ZNF7	1.33828	2.25e-05
COPA	1.33798	0.005757
TEF	1.33797	0.0165186
NUDT22	1.33791	0.0034923
CS	1.33771	0.0347208
DPYD	1.33754	4.76e-06
FAM134B	1.33743	0.0225523
TUBA4A	1.33718	0.0194012
AP3D1	1.33702	0.0025613
PCGF5	1.33687	0.000562848
PRKCD	1.33687	0.0532907
C2orf40	1.33666	0.0770147
DCXR	1.33639	0.0231872
HNRNPH1	1.33639	0.000881001
LOC100129961	1.33618	0.00901623
HDGFRP2	1.33617	0.00172144
CDK7	1.33611	0.00628337
MRP63	1.33604	0.0479413
SPATA13	1.33594	0.0171349
AP1AR	1.3357	0.0204453
HOXD8	1.33557	0.000735752
UQCRC2	1.33554	0.00188139
BBS10	1.33542	0.026957
MRTO4	1.33528	4.61e-05
PCCB	1.33527	0.00193879
MTHFSD	1.33525	0.0148143
PPP1R12A	1.33517	0.000919145
TRIM21	1.33516	0.000482166
ZNF85	1.33511	0.0151794
COQ7	1.33504	0.000643934
GPBP1	1.33498	1.85e-05
NRN1	1.33459	0.0115159
RPLP1	1.33444	0.000316542
DNAJC7	1.33427	2.07e-05
RPS29	1.33397	0.00255343
SLC25A10	1.33375	0.0570911
TMOD1	1.33372	0.0815918
WDR46	1.33319	0.00226105
HERPUD2	1.33315	0.00141224
SLC25A38	1.33302	0.00585355
RSF1	1.33299	1.28e-05
PSMD4	1.33283	0.000324353
FAM13A	1.33246	0.0332321
SNX33	1.33246	0.0064943
GTF2F1	1.33241	0.00233915
TCEA2	1.3324	0.00112028
TMEM220	1.33204	0.00274931
RPPH1	1.33165	0.0329845
IDH1	1.3315	0.00248722
ANKRD13D	1.33122	0.0126082
CHCHD6	1.33096	0.0122894
LRRC16A	1.33038	0.0380189
HDDC2	1.33034	0.000209834
TSPO	1.33025	0.0583565
PHRF1	1.33	0.0013565
LARGE	1.32998	0.00162671
SBNO2	1.32996	0.0147636
SHROOM4	1.32967	0.00942887
GNG7	1.32961	0.0689044
THNSL1	1.32941	0.0189939
TBX6	1.32932	0.0953269
SERTAD2	1.3292	0.000665458
NR2C2AP	1.32906	5.33e-05
RGS6	1.32905	0.0833303
PSMC2	1.32899	0.00174855
PICK1	1.32871	0.00424775
SMUG1	1.32869	0.0105084
TAF1	1.32867	5.36e-05
RPUSD2	1.32863	0.00143688
SRBD1	1.32845	0.000326137
DUS1L	1.32841	0.000809233
ARHGAP33	1.32816	0.031845
GORAB	1.32796	0.00366725
BTBD19	1.32794	0.00734363
DTX2P1-UPK3BP1-PMS2P11	1.32757	0.034293
RCCD1	1.32751	0.0874245
BDH2	1.3275	0.00554686
CADM4	1.32716	0.0794064
C19orf60	1.32715	0.000916647
DBT	1.32709	0.000745684
ZCCHC7	1.32686	5.37e-06
ZNF792	1.32665	0.00260129
PAGR1	1.32636	0.00222993
CORO6	1.32632	0.0478363
SNX1	1.32625	5.61e-05
ATP5H	1.32616	3.13e-05
RAB7A	1.32609	9.21e-05
ACYP2	1.32564	0.0130501
RRP8	1.32563	0.000984397
ZADH2	1.32509	0.0124133
RBBP4	1.32509	2.64e-07
RPA2	1.32501	0.000140429
FAM73A	1.325	0.00511439
RHOT2	1.32494	0.00216152
RPL10A	1.32474	0.00107855
WDR77	1.32461	0.00177164
ARHGAP32	1.32458	0.00503721
LOC728819	1.32456	0.0747597
AGAP6	1.32454	0.00890939
MSL2	1.32446	3.43e-05
CTU2	1.32414	0.00760175
ZNF589	1.32379	0.00806924
MSL3	1.32371	0.0113603
FAM173B	1.32367	0.0719663
MAFK	1.32361	0.0109122
RBM43	1.32358	0.00317498
THRSP	1.32355	0.0883411
EIF4EBP1	1.32346	0.0817194
IL6ST	1.32334	0.000807847
RPIA	1.32334	6.1e-05
NEGR1	1.32317	0.0189437
PCDHB19P	1.32288	0.0471621
TRIM25	1.32253	0.00164118
HSPA12B	1.3225	0.00454656
SCARNA17	1.32228	0.0273495
FBXW11	1.32199	0.000330759
MPP5	1.32183	0.00444602
AVIL	1.32176	0.0606628
C8orf58	1.32175	0.00384129
SARNP	1.32159	0.000282871
LOC202181	1.32134	0.00481435
EXOC4	1.32097	0.00080354
USP33	1.3209	0.00141208
YWHAB	1.32088	0.00206611
DYNLRB1	1.32077	0.000662838
ANKRD36	1.32062	0.0171521
SUCLG1	1.32061	0.00964564
MPHOSPH9	1.3205	0.006872
SPATA5L1	1.32033	0.00233747
HIST2H2BE	1.32028	0.00120093
C19orf54	1.32	0.0228625
GPATCH8	1.31985	0.000672184
WHAMMP1	1.31982	0.0277292
LRP4	1.3197	0.0693198
ERGIC1	1.31961	0.0330648
ARAF	1.31959	0.020093
C14orf169	1.31937	0.00401189
TNFAIP8L1	1.31934	0.0481821
AKR1E2	1.31924	0.0522852
TRIM33	1.31915	0.00538966
FAAH	1.3191	0.0668411
MAP2	1.31909	0.066676
NMB	1.31903	0.0684273
MITD1	1.31892	0.00342127
RPS16	1.31886	0.000939585
UBQLN1	1.31884	0.000372749
HERC5	1.31876	0.0638398
TRADD	1.31851	0.0372541
SMARCA2	1.31844	0.00102009
EXOC7	1.31842	0.000161461
TCERG1	1.31835	0.00820897
HEMK1	1.3183	0.0089634
KIFC2	1.31819	0.0102061
MTF2	1.31808	0.00109829
CORO1C	1.31807	0.000208263
BCL7C	1.31767	0.000860913
ADPRM	1.31764	0.0110281
CCDC174	1.31756	7.24e-05
ANP32A	1.31603	9.42e-05
VPS28	1.31583	0.000894393
ZC3H12C	1.31581	0.00320575
RILPL2	1.31551	0.0155478
TAS2R20	1.31539	0.0534919
ESRRA	1.31536	0.00386419
PPCDC	1.31525	0.0237992
TAF9	1.31518	0.00666646
FAM127B	1.31511	0.00727415
SLC12A7	1.31505	0.00848848
C12orf66	1.31502	0.0499226
ZNRF2P1	1.31485	0.0515239
GNE	1.31464	0.00094241
ZNF503	1.3145	0.0340776
YIPF2	1.31388	0.00354522
POLRMT	1.31386	0.00536266
ANO6	1.31384	0.00732518
MAP2K6	1.31371	0.0549538
LOC645513	1.31368	0.0715392
SRFBP1	1.31361	0.0141208
C3orf37	1.31346	0.00148957
KCTD7	1.31343	0.00661327
MDM4	1.31307	0.000302301
HCG18	1.31248	0.0262825
FAM180A	1.3121	0.0720794
TSN	1.3116	0.000261543
ZRANB2	1.31088	0.00670898
WWP2	1.31074	0.000280703
POLR2J3	1.31028	0.021934
DGCR11	1.31024	0.0315568
CD93	1.31019	0.0584958
SNORA23	1.31018	0.00150186
TCEA1	1.31018	7.73e-06
AIFM2	1.31016	0.0250536
PCDHB10	1.31006	0.00737441
EEFSEC	1.31005	0.00369764
KGFLP2	1.31003	0.0857703
SETD9	1.30991	0.0302254
CC2D2A	1.30973	0.0122119
PGP	1.30973	0.0390993
OCIAD1	1.30957	4.85e-05
RPS10	1.30941	0.00114473
LINC00623	1.30935	0.0288648
TPCN2	1.30926	0.0199537
LOC100132707	1.30914	0.0277087
ERCC6	1.3088	0.0149736
LEMD3	1.30879	3.65e-05
TRNAU1AP	1.30876	0.00137927
HVCN1	1.30871	0.0482214
DTD1	1.30869	0.000770696
TET1	1.30867	0.0381885
DZANK1	1.30867	0.0218191
FAM3A	1.30856	0.0138275
CYTH1	1.30841	0.0149074
ZNF529	1.30828	0.000557386
CPS1	1.30822	0.0544275
DGCR6L	1.30817	0.00500578
TMEM180	1.30814	0.0612202
CBLN3	1.30786	0.0792312
CHCHD2	1.30775	2.02e-06
NOP16	1.30775	0.0168407
MRPS5	1.30749	0.000259543
GMPR	1.30711	0.0336746
SEC16B	1.307	0.049156
AMIGO3	1.30677	0.0203202
PIGL	1.3065	0.0195179
EBLN2	1.30631	0.0463098
C5orf43	1.3063	0.0011826
IMMP2L	1.30622	0.0102521
TACC1	1.30561	0.00142276
CCDC28A	1.30552	0.000252025
PCNA	1.30549	0.00038225
TMEM110	1.30547	0.00518481
APLP2	1.30539	0.0112657
SRSF3	1.30523	0.0060474
CLASP1	1.30505	0.00210498
LAMA2	1.30504	0.00466159
NDUFS5	1.30478	0.00017047
NUP54	1.30473	1.52e-05
GPR125	1.30473	0.0187319
SSFA2	1.30465	0.00059849
ZNF193	1.30443	0.0188361
TRIP12	1.30437	0.0060538
PIGV	1.30387	0.0176141
SETD5	1.30381	3.37e-05
UQCR11	1.30379	0.00101532
ZNF597	1.30352	0.0222641
TOMM40L	1.30344	0.00854917
SUOX	1.30327	0.0113881
INTS8	1.30319	8.97e-06
NSUN4	1.30317	0.0101824
DNAJC21	1.30307	0.000900767
SRGAP2B	1.30281	0.0453641
ZNRD1	1.30262	0.00456223
S100A6	1.30261	0.0139517
SCAND2	1.30225	0.0449185
FOXO4	1.30223	0.00934764
EMC3	1.30216	0.00375826
MRPL51	1.30199	0.00799695
RDBP	1.30184	0.000177793
SNORA5C	1.30181	0.0328244
ERICH1	1.30179	0.0333845
NDUFA11	1.30167	0.00674722
RAE1	1.3016	0.000898784
RYBP	1.30149	0.00479836
CHD1L	1.30146	0.0344514
KIAA0430	1.30107	0.0117401
RBM12	1.30105	0.0359427
CYC1	1.30104	0.0046145
QRICH2	1.30102	0.0979547
DCLK2	1.30089	0.0143108
GTF2IRD2B	1.30088	0.000507992
HTATSF1	1.30082	0.00466022
COQ9	1.30071	0.00398171
GLRX2	1.30066	0.00375411
FAM50B	1.30058	0.0105343
ACOT8	1.30053	0.0213894
NEMF	1.30044	0.000991869
HOXB7	1.30036	0.00476426
TBCB	1.30033	0.00240344
ARHGEF40	1.30027	0.0377523
ATP9A	1.30022	0.0611858
PMVK	1.29997	0.0193877
MYO9B	1.29982	0.0293043
BRMS1	1.2998	0.00730774
RPL27A	1.29955	0.000378428
GUCY1A3	1.29923	0.0202186
DENND2A	1.29894	0.00490638
C14orf93	1.29871	0.00320598
ARRDC1	1.29862	0.00552897
UBE2F	1.29843	0.0414949
PPP1R12B	1.29843	0.0746588
SNORD15A	1.29838	0.0129068
KLF16	1.2983	0.0973501
CTTNBP2NL	1.29814	0.000365219
IL18R1	1.2981	0.0508962
NAA10	1.29801	0.00823167
KITLG	1.29799	0.0231437
TCTN2	1.29777	0.0224586
ZNF514	1.29761	0.0184567
ATE1	1.29733	0.00401551
CLCN6	1.29699	0.00013746
HERC1	1.29672	0.00244393
GPR180	1.29667	0.0546275
RAMP2	1.29655	0.0035843
ATN1	1.29635	0.00349967
DROSHA	1.29629	0.000543308
PXK	1.29611	1.08e-05
RPL12	1.29592	0.00219368
PTPRB	1.29583	0.00327247
SAMD9L	1.2958	0.0553072
UBE2L6	1.29578	0.0451802
SCD5	1.29534	0.0704986
C22orf29	1.29522	0.018375
SCML2	1.29516	0.075634
VIPAS39	1.295	0.000269161
GRSF1	1.29475	0.00138645
C5orf55	1.29435	0.0300613
SCYL1	1.29417	0.00373143
CARKD	1.29395	0.00177509
TBL2	1.29393	0.00142191
PHF1	1.29388	4.97e-05
TDRD7	1.29359	0.00693458
FAM151B	1.29353	0.0591154
MRPL54	1.29346	0.0196256
WAPAL	1.29344	0.000511886
AGTPBP1	1.29332	0.00401013
C6orf228	1.29301	0.00754975
IRX2	1.2929	0.0939452
SLC39A8	1.29279	0.0405497
LSM14B	1.29265	0.0016463
MAT2B	1.29264	7.87e-05
KBTBD2	1.29259	0.000110189
ZNF736	1.29233	0.0907707
ZNF697	1.29231	0.0513086
CAT	1.2923	0.0260227
MTHFD2L	1.29195	0.0610328
UIMC1	1.29192	0.00653846
BCL2	1.29184	0.060354
THAP3	1.29179	0.0255103
DTX4	1.29132	0.0712134
GFPT1	1.29132	0.0069092
TTC27	1.29122	0.0327703
CRYZ	1.29111	0.0179852
AZI1	1.29098	0.044125
KLHL12	1.29092	0.00691578
FES	1.29082	0.00521946
NELF	1.29077	0.0134346
TMEM230	1.29011	0.0548181
SCAPER	1.29002	0.00839482
OTUD1	1.29	0.0019934
TFIP11	1.28999	0.000146502
KANSL2	1.28976	0.000159606
FAM105B	1.28955	0.0108203
TAF1A	1.2895	0.00793141
SNRK	1.28948	0.000556839
GPIHBP1	1.28913	0.046889
TRMT1	1.28891	0.000653539
NOVA1	1.28843	0.0274122
TAZ	1.2884	0.00436076
ADCY9	1.28812	0.00124929
MRPS27	1.28811	0.000145503
KIAA1967	1.28782	4.95e-05
EIF2D	1.28769	0.00167824
ZZZ3	1.28743	0.00037511
PSME2	1.28709	0.0109127
RNF8	1.28705	0.00102021
ZC3H18	1.2869	0.000183818
POLR2C	1.28686	0.00187987
TOM1	1.28666	0.00116676
IFIH1	1.28665	0.0145528
ALG8	1.28659	0.00383951
NDUFA12	1.28594	0.00678554
COX18	1.28581	3.9e-05
FIGN	1.28577	0.00892112
SRSF4	1.28547	0.000124887
TMED4	1.28537	0.000994987
RIF1	1.28534	8.55e-05
ZNF260	1.28515	0.00104921
R3HDM2	1.28497	0.00044753
CNST	1.28496	0.0367802
FER	1.2842	9.46e-05
ZNF214	1.28393	0.0626818
SHARPIN	1.28392	0.00139383
MTBP	1.28362	0.0818776
RGAG4	1.28357	0.0517026
H6PD	1.2835	0.0148678
NUPL2	1.28319	0.000209922
SOX7	1.28316	0.082666
LOC90834	1.2829	0.043059
DCP1B	1.2828	7.4e-05
EZH1	1.28266	0.00043925
TMEM135	1.28264	0.0126689
SERGEF	1.28224	0.00293985
KLHL21	1.2822	0.0101731
CPE	1.28207	0.026324
PSD3	1.28142	0.0490694
PECR	1.2813	0.0898617
PHF3	1.28119	0.000266682
SYNJ2BP	1.2811	0.01311
ACTN1	1.28109	0.0700377
CERS5	1.28099	0.000849242
CPOX	1.28097	0.0185352
PCDHB8	1.28095	0.0590784
TMEM161B	1.28039	0.0288019
SNRPD3	1.28034	8.13e-09
HOXB4	1.28015	0.00571266
USP11	1.28012	0.00467674
TOP1	1.27984	0.00605823
PSMA1	1.27969	0.00246722
COX7B	1.27917	0.00339268
ARL14EP	1.27916	0.000370842
PRPF4B	1.27912	3.19e-05
TXN	1.2791	0.000742303
EXOSC1	1.27906	0.00956806
ATRX	1.27887	0.00772434
OTUD4	1.27883	0.00721459
PCTP	1.27856	0.0285495
RPS27A	1.27846	0.00104981
NCOR2	1.27843	0.00205093
TIA1	1.27841	0.000291226
MUTYH	1.27839	0.0715942
NR2F6	1.27812	0.0588177
POLE4	1.27795	0.0102662
TRUB1	1.27784	0.00581766
SULT1A4	1.27773	0.0301235
SLC44A1	1.27769	0.0016614
PTEN	1.27767	0.0576397
C12orf65	1.27751	0.00552852
EXD3	1.27738	0.0418315
PPIL4	1.27737	0.0050933
COX7C	1.27723	0.00541719
AKT1	1.2772	0.00310728
ACACB	1.27718	0.0858129
TARS2	1.27702	0.00338501
FOXP1	1.27668	0.000879571
LAGE3	1.27611	0.00870648
PDE3A	1.27609	0.0915591
BRPF3	1.27581	0.0017348
PTPRM	1.27571	0.00186508
DCTN2	1.27558	2.07e-06
KIAA0494	1.27555	0.0223029
DARS2	1.27552	0.00707294
RAB40B	1.27543	0.0240025
COG8	1.27531	0.0285875
MRPL2	1.27498	0.0195214
KLHL22	1.27488	0.0077845
GABPB1	1.27479	0.0309825
MIOS	1.27475	0.00305284
EBF3	1.27472	0.00643204
TGDS	1.27466	0.0162333
GNA11	1.27448	0.00873302
ZNF684	1.27447	0.0561059
CHPT1	1.27444	0.00501547
HSD17B11	1.2744	0.0004878
YIPF4	1.27433	0.0135283
PRDM15	1.27413	0.0192159
SLC22A3	1.27404	0.0562953
LOC100129250	1.27396	0.00611272
CPT1A	1.27393	0.0332697
HAX1	1.27384	0.00765504
PPM1A	1.27379	7.45e-05
FARSA	1.27367	0.000190873
FAM120C	1.27358	0.00475155
ZNF24	1.27355	0.00127574
IRAK3	1.27353	0.0278568
RPL36AL	1.27331	0.00178592
C15orf61	1.27318	0.0079043
ALG13	1.27314	0.023948
UTP20	1.27309	0.00240781
TTBK2	1.27282	6.32e-05
SCO1	1.27274	0.00389987
FBXO4	1.27263	0.00308748
STX8	1.27263	0.00154856
LRCH2	1.27262	0.0493766
SON	1.27255	3.86e-06
G2E3	1.27253	0.00330119
CACHD1	1.27228	0.0129746
C5orf22	1.27222	0.0130253
PCNX	1.27221	0.00102754
PDZD8	1.27193	0.000692793
RANGAP1	1.27188	0.0297773
FKBP2	1.27181	0.00644346
LAS1L	1.2718	0.000312616
HNRNPF	1.27174	0.0334436
TMEM179B	1.2717	0.000114311
UBE3C	1.27152	0.00278155
ZC3H7A	1.27148	0.00147527
KIN	1.27141	0.00132229
ILVBL	1.2714	0.0159711
RECQL5	1.27127	0.00386933
PRPSAP2	1.27117	0.0038733
ZNF187	1.27106	0.011459
PAR5	1.27097	0.015107
TRIM37	1.2709	0.00449341
DUSP19	1.27084	0.0733021
DCAF17	1.27079	0.00949354
FAM160A2	1.27056	0.00459799
PUS10	1.27042	0.0390205
PPDPF	1.27035	0.00136671
TALDO1	1.27028	0.039976
LOC730102	1.2702	0.0488253
BCL2L13	1.26995	0.0143572
PRKAB1	1.26992	0.0182525
EXOC8	1.26987	0.0168875
TTC14	1.26965	0.0204404
LEPROT	1.26957	0.000945414
PTOV1	1.26952	0.000948126
NARG2	1.26948	0.000599308
ZCCHC8	1.26945	0.000365444
TSPAN13	1.2694	0.0449945
SEC63	1.26931	0.00138542
MIER2	1.26926	0.0124965
ZNF717	1.26909	0.00620133
LSG1	1.26895	0.00542335
DYNLL1	1.26893	0.0476467
UBE2M	1.26888	0.00016197
PCDHB6	1.26883	0.0933096
ZFP30	1.26883	0.0114143
PGGT1B	1.26883	0.000584329
ANKRD27	1.26871	0.0272156
NUDC	1.2687	0.00119217
MTHFS	1.26857	0.0730497
GSN	1.26848	0.0634039
RAPGEF6	1.26842	0.0310551
RPS19	1.26814	0.00520405
RPS23	1.26812	0.010662
NOP56	1.2681	3.99e-05
CARD10	1.26798	0.0530739
GARS	1.26787	0.0493807
RBBP7	1.26782	8.68e-06
SMARCD1	1.26755	0.000970726
ENOX2	1.26738	0.0374824
STX2	1.26732	0.0165287
ORAI2	1.26731	0.064929
RPS4X	1.26725	0.00911077
MANBAL	1.26715	0.00447749
TRA2A	1.26713	0.0037417
DRG1	1.26698	0.00147288
MKLN1	1.26693	3.73e-07
ETNK1	1.26689	0.00121945
NDUFB9	1.26673	0.000438459
CISD2	1.26664	0.0499025
INVS	1.26662	0.000880093
MRPL12	1.26656	0.0253368
PI4KAP2	1.26648	0.0922199
TSFM	1.26639	0.0300368
ASH1L	1.26619	0.00259023
ELTD1	1.26595	0.00292359
PTPN14	1.26593	0.0283963
ZNF107	1.26592	0.0749739
WHSC2	1.26569	0.00130858
WDR70	1.26562	0.000100446
CPNE1	1.26532	0.0434515
INO80E	1.26499	0.0118455
TAOK3	1.26482	0.0483253
PTPDC1	1.26476	0.0278294
DGCR8	1.26452	0.00270466
SFSWAP	1.26445	0.00415029
XPO5	1.26438	0.00581775
TADA2B	1.26438	0.00280671
ZNF596	1.26404	0.0797585
[truncated: 2,756 more rows]

## Sheet: Table S10
Supplementary Table S10. Differentially expressed adipose genes in external dataset in GSE 20571 at 1.2 Fold change and p<0.1 related to Figure 9
Gene	Fold change	p-value
GPR32P1	47.1766	0.0016417
SLC27A2	4.28709	0.0022021
AADAC	4.08405	0.097058
BMP3	3.22657	0.0080546
GPAT3	3.16017	0.0008152
STOX1	2.39496	0.000944
PKP2	2.34567	7.08e-05
AZGP1	2.31338	0.0063808
APOL4	2.2974	0.0026998
LINC00417	2.25012	0.0004217
VEGFA	2.15846	0.0001649
SNORD115-42	2.14355	0.0051357
GSDMB	2.12874	0.0004999
APOC1	2.07053	0.0088113
C6	2.04202	0.0006562
APOB	1.96837	0.0293384
CETP	1.95071	0.0683787
CIDEA	1.91853	0.0055396
LPIN1	1.88557	0.0001084
GGCT	1.88165	1.61e-05
ALPK3	1.87774	0.0030742
APOE	1.87384	0.0010597
CISH	1.85446	0.0022712
FGFBP2	1.84421	0.010614
NDRG4	1.83401	0.0007523
CA3	1.81504	0.0415914
USP32P1	1.81127	0.0216133
ECHDC3	1.78757	0.0002182
NWD2	1.76908	0.0048477
COL6A6	1.76786	0.0779346
TRGC2	1.76663	0.0006788
MAP1LC3C	1.74836	0.0010853
GPD1L	1.73869	0.0020208
RGS3	1.72071	0.000882
TF	1.71594	0.0289652
MOCS1	1.71356	0.0014227
FIGF	1.70409	0.014264
LRRC75A-AS1	1.68997	0.001156
RORB	1.68763	0.0346323
ALDH1L1	1.68063	0.004062
ORMDL3	1.67133	0.0009535
MAP3K5	1.66555	0.0036715
ABCB11	1.66094	0.0169461
ABHD5	1.65979	0.0025913
SLC7A10	1.65979	0.0189331
GREB1L	1.65864	0.0002793
LRP1B	1.65519	0.0581859
RASL10B	1.64035	0.0015682
ADGRG2	1.63014	0.026693
KLRC4-KLRK1	1.62225	0.0368714
PMM1	1.6077	4.5e-05
LDHD	1.59218	0.0019756
TARP	1.58997	0.0054961
TARP	1.58997	0.0054961
PYGM	1.58887	0.0013016
ZFAND5	1.58887	0.0007635
RDH10	1.58447	0.0072389
GLUL	1.58008	0.000365
CALCRL	1.57789	0.002912
ACVR1C	1.57135	0.0090609
TM7SF2	1.56808	0.0032744
FHOD3	1.56374	0.0084937
SLC19A3	1.56049	0.0081512
COQ8A	1.55617	0.0014871
ORC2	1.55617	0.0018672
IGF1	1.55186	0.0007617
CKB	1.54971	0.0027784
SNORD115-38	1.54649	0.0880334
AASS	1.54542	0.0011729
GLUL	1.54328	0.0008778
FASN	1.54007	0.0084031
MYPN	1.53368	0.0023967
GTF2A1L	1.53368	0.0070912
ACSS3	1.53156	0.0081649
PSG2	1.53156	0.0815867
SLC19A2	1.51992	0.0039991
AGT	1.51467	0.00176
NIPSNAP3B	1.51362	0.0233066
UTS2B	1.51362	0.0038414
ALDH6A1	1.51047	0.0039183
EIF4EBP1	1.50943	0.0010534
EPB41L4B	1.50629	0.0082774
SLC1A3	1.50108	0.0026005
SLC39A14	1.49485	0.0041341
SLC2A4	1.49381	0.0164312
PDK2	1.48968	0.0030332
BDH1	1.48658	0.0028333
PCK1	1.48452	0.0403278
MPZL2	1.48247	0.0449432
PTPN3	1.48247	0.004238
KLF15	1.47734	0.0017455
ATP1A2	1.47121	0.0292778
PXMP2	1.46917	0.0014417
CPXM1	1.46003	0.0286102
PC	1.45801	0.0027608
ARHGEF26	1.457	0.0096761
CRLS1	1.45297	0.0006542
ANKRD53	1.44493	0.006001
ACER2	1.44393	0.0215877
RWDD2A	1.44393	0.0060428
PCK2	1.44093	0.0152302
DUSP4	1.43893	0.0074616
TTLL7	1.43794	0.0304625
ABCA1	1.43594	0.001934
TWIST1	1.43098	0.0069046
FAM159B	1.42998	0.0576461
CHCHD10	1.42405	0.0004813
GLYCTK	1.42208	0.0110599
MMP8	1.42208	0.0591647
ST3GAL6	1.42109	0.0078645
ADH1A	1.41814	0.0017902
LGALS12	1.41716	0.0015311
NCAM2	1.41519	0.0022037
AK4	1.41421	0.0034762
TMEM132C	1.41421	0.0367254
ACACB	1.4103	0.0055792
SNORA69	1.40737	0.0891945
PCYT2	1.40153	0.0012258
CHKA	1.40056	0.0042817
FAM134B	1.39959	0.0044923
CENPV	1.39765	0.0048044
CCDC144CP	1.39668	0.0589982
CFHR4	1.39668	0.0663312
C5orf30	1.39281	0.0770686
GPT	1.39281	0.0013143
ABCG1	1.39185	0.0242189
SLC2A1	1.38992	0.0002185
ENOX1	1.38799	0.0367515
ADH1B	1.38703	0.0017958
PDE1B	1.38703	0.0004072
F3	1.38607	0.0064997
HADH	1.38511	0.0074484
PCBD1	1.38415	0.0050515
THYN1	1.38415	0.0012917
CCDC144CP	1.38223	0.0717244
PCYT2	1.38127	0.0013133
PGM3	1.38127	0.0142438
TIMP4	1.38032	0.0084616
CDKN2C	1.3765	0.0533758
EGFLAM	1.3765	0.0080089
GPHN	1.3765	0.0034384
APMAP	1.37459	0.0046075
PTEN	1.36604	0.0016233
ALDH6A1	1.3632	0.0236722
DDR1	1.36226	0.0023974
DDR1	1.36131	0.00242
DDR1	1.36131	0.0024327
CCDC144CP	1.35943	0.0370078
RIDA	1.35754	0.0140021
SRPX	1.35472	0.0103131
CTH	1.35004	0.0743824
GINS3	1.3491	0.0046595
OR56A4	1.3491	0.0834135
PPP1R1B	1.34817	0.02848
OR4C12	1.34723	0.0648996
SHMT1	1.34723	0.0067619
GPT2	1.34537	0.0193986
ADH1C	1.34443	0.0006933
CYB5A	1.34257	0.0035446
CABP1	1.34164	0.0582154
NRIP1	1.33978	0.0141632
PCCA	1.33886	0.0140283
RNF157	1.33886	0.0546983
RPS6P6	1.33793	0.0003594
ZNF75D	1.337	0.0346845
ZNF75D	1.337	0.0346845
SIK2	1.337	0.0052297
MT1A	1.33607	0.0828396
GMCL1	1.33422	0.040111
MRGPRX3	1.33422	0.0021874
AK4	1.3333	0.0107705
CCDC144CP	1.3333	0.0366792
PTEN	1.33053	0.0024225
S100B	1.32777	0.0616555
ETFA	1.32685	0.0077959
PRUNE2	1.32501	0.0799474
REEP6	1.32317	0.0182612
BCAT2	1.32225	0.0003821
SLC25A1	1.32225	0.0066044
TMEM100	1.31951	0.0896961
IL1RAP	1.31768	0.0088641
PFKFB3	1.31585	0.0669026
ADAMTS9	1.31221	0.0491732
PROKR1	1.31221	0.0289054
SNORD13	1.3113	0.0363164
GPX3	1.31039	0.0515369
LRIG1	1.30858	0.0360493
NAMPT	1.30677	0.0355847
MOCOS	1.30586	0.0441371
CNTFR	1.30405	0.0053476
NAMPT	1.30405	0.0350523
SLC19A1	1.30224	0.0062215
FOXP2	1.30134	0.0593292
FFAR2	1.29864	0.0988538
RNF125	1.29864	0.0158546
SNORD13P3	1.29864	0.0521725
ARID5B	1.29684	0.0537662
LRRC75A-AS1	1.29684	0.0042057
MT1M	1.29684	0.0339374
ACY1	1.29504	0.0028047
CSAD	1.29415	0.0061441
FKBP5	1.29235	0.0266438
MCCC2	1.29235	0.0025095
MCCC2	1.29235	0.0025095
ESR1	1.29146	0.0208347
MAGEB6	1.29146	0.0698352
PDP2	1.29146	0.0371895
MT1F	1.29056	0.0132369
DAPK2	1.28788	0.0519983
BCKDHB	1.28699	0.0226292
BAG4	1.28521	0.0174185
C9orf72	1.28432	0.0198873
POM121L2	1.28432	0.0020547
DDT	1.28165	0.0089251
HERC5	1.28165	0.0497985
TTC36	1.28165	0.0359819
BOK	1.28076	0.0225456
FAM89A	1.28076	0.0300817
COX7C	1.27987	0.0057222
HEBP2	1.27987	0.0143753
STAT4	1.27987	0.0284014
XKRY2	1.27899	0.0130817
XKRY2	1.27899	0.0130817
LIN7A	1.2781	0.0424928
RPL22L1	1.2781	0.0091115
SULF1	1.2781	0.0741374
PAGE2	1.27633	0.0416922
NR1H3	1.27544	0.0030928
LOC90768	1.27456	0.059564
PHLPP1	1.27456	0.0409539
ACSF2	1.27368	0.0444951
RCL1	1.27368	0.0188
VDAC2	1.27368	0.0143664
KRTAP19-6	1.27279	0.0214563
GFRA3	1.27191	0.0137997
SPON1	1.26751	0.0429458
UQCRHL	1.26751	0.0081036
GHR	1.26663	0.0268601
ZNRD1	1.26576	0.0268439
UQCRH	1.26488	0.0045456
DECR1	1.264	0.0215823
TSHR	1.264	0.0210804
AKAP1	1.26313	0.0485245
CS	1.26313	0.0083554
CCNG2	1.26225	0.0508074
GCDH	1.26225	0.002602
VPS36	1.26225	0.0305613
KIF4B	1.26138	0.0357922
RGMB	1.26138	0.013572
SPRR2B	1.2605	0.0270648
ST6GALNAC2	1.2605	0.0195496
ST6GALNAC2	1.2605	0.0195496
ECHS1	1.25876	0.0158008
OR8G5	1.25876	0.0171827
PDK1	1.25876	0.0375657
RAMP2-AS1	1.25788	0.0252291
DCXR	1.25701	0.007308
MRPL46	1.25701	0.0292211
VSTM4	1.25701	0.0218348
RPS10P7	1.25614	0.0199137
OR4N3P	1.2544	0.064042
C11orf1	1.25353	0.0256067
MTHFD1L	1.25353	0.083116
MTHFD1L	1.25353	0.0849987
LETMD1	1.2518	0.0174778
ZNRD1	1.2518	0.0182676
C20orf27	1.25093	0.0094696
CYC1	1.25093	0.0049649
FGFRL1	1.25093	0.0168676
SNORD49A	1.25006	0.0307471
ACACA	1.2492	0.0933456
C4A	1.2492	0.0228314
C4A	1.2492	0.0228314
C4A	1.2492	0.0228314
ERRFI1	1.2492	0.0526281
IDH2	1.2492	0.0446094
CIART	1.24747	0.0981653
UQCRC2	1.24747	0.0260733
FAM156B	1.2466	0.0179396
LSM6	1.2466	0.0235809
MLYCD	1.2466	0.0114187
OR2AK2	1.2466	0.0634547
RPL41	1.2466	0.0087151
MTHFD1L	1.24574	0.0719138
MTHFD1L	1.24574	0.0719138
SVIL	1.24574	0.0538264
SCD	1.24487	0.075463
ECHDC2	1.24401	0.0603831
FAM126B	1.24401	0.0263158
FAM156B	1.24401	0.0216919
SLC7A13	1.24401	0.0201053
DLST	1.24315	0.0136618
MPC1	1.24143	0.0146771
NSA2	1.24143	0.0146287
RPS13	1.24143	0.0049229
TMEM120A	1.24143	0.0192426
CISD1	1.24057	0.018535
MET	1.23971	0.0691136
RNF217	1.23971	0.0302646
FH	1.23885	0.007764
IRAK3	1.23885	0.0272208
MSRB1	1.23885	0.0169502
NDUFA4	1.23885	0.0052163
AK2	1.23799	0.0180126
ASB17	1.23799	0.0336352
OR5T3	1.23799	0.0853938
ACSS2	1.23713	0.074993
MAGEL2	1.23713	0.0576795
PQLC1	1.23713	0.0085385
LDLRAD3	1.23542	0.0091393
DMRT2	1.23456	0.0784451
NDUFB5	1.23456	0.0443826
ADH4	1.23371	0.0877583
ENOSF1	1.23371	0.0236512
HSD17B12	1.23371	0.0186478
NDUFAF2	1.23371	0.0273027
STK39	1.23371	0.036473
TMLHE	1.23371	0.0189564
CPM	1.23285	0.0359626
CHP1	1.232	0.0166784
DLSTP1	1.232	0.0078741
GNAI1	1.232	0.0915374
IRAK2	1.232	0.0601562
MCCC1	1.232	0.0615357
SCN4A	1.23114	0.0729634
SCO1	1.23114	0.0078055
ACADS	1.23029	0.0211848
NUDT4P1	1.23029	0.0165535
SNORD115-32	1.22944	0.0441316
GNA14	1.22774	0.039614
HIST2H4B	1.22774	0.0973847
HIST2H4B	1.22774	0.0973847
PECR	1.22774	0.0541051
PLCXD1	1.22774	0.0494725
ECI1	1.22688	0.0082447
PLCXD1	1.22688	0.0473296
RTN1	1.22688	0.0855855
CERS6	1.22603	0.0377334
COX8A	1.22519	0.0006977
LINC00305	1.22519	0.0155215
HSPD1	1.22349	0.0132917
RMND1	1.22264	0.0323997
SCP2	1.22264	0.0307793
CDC34	1.22179	0.0031771
IGBP1	1.22179	0.0540048
GJC3	1.22095	0.0619139
LACTB2	1.22095	0.0472176
SLED1	1.22095	0.0346515
PDK4	1.2201	0.058907
ANKEF1	1.21841	0.0064194
PIK3R1	1.21841	0.0487415
SMIM3	1.21841	0.001393
C17orf53	1.21757	0.0127092
NT5DC3	1.21757	0.0201104
USP30	1.21757	0.0467235
TCEB3	1.21672	0.0683008
ADAMTSL4	1.21588	0.0864847
RPL13AP3	1.21588	0.037048
RPL24	1.21588	0.008665
TMEM25	1.21588	0.0130809
HSD17B8	1.21504	0.0166668
HSD17B8	1.21504	0.0166668
HSD17B8	1.21504	0.0166668
CBS	1.21419	0.0383316
GKAP1	1.21419	0.0627951
LAMB1	1.21335	0.0730025
RPL13	1.21335	0.0115421
RPS15A	1.21335	0.0088853
TMTC4	1.21335	0.0323107
COX14	1.21251	0.0778797
LPCAT3	1.21251	0.0491859
RPL24	1.21251	0.0092244
SNORD115-24	1.21251	0.0295195
SNORD115-24	1.21251	0.0295195
SNORD115-24	1.21251	0.0295195
EIF3CL	1.21167	0.0266012
EIF3CL	1.21167	0.0266012
MIR376C	1.21167	0.0616162
PRMT7	1.21167	0.0368169
RPL13	1.21167	0.0115596
RPS2	1.21167	0.0126332
RXRG	1.21167	0.028542
WDR86	1.21167	0.0748158
BSG	1.21083	0.0431691
L2HGDH	1.21083	0.0543874
RPL10A	1.21083	0.0119468
SNORD4B	1.21083	0.0345871
CLUH	1.20999	0.0064593
GPCPD1	1.20999	0.0423336
RPL9	1.20999	0.012003
RPL9	1.20999	0.0121051
TNK1	1.20999	0.0078343
TTC41P	1.20999	0.0801561
USMG5	1.20999	0.0062647
LONRF1	1.20916	0.0980819
RPL9	1.20916	0.012499
MKNK2	1.20832	0.0293191
RPL29	1.20832	0.0083809
RPL11	1.20748	0.020127
ASS1	1.20664	0.0391531
MIR200A	1.20581	0.0522576
RPL9	1.20581	0.0135556
TGDS	1.20414	0.0529255
GJA1	1.2033	0.0948192
HADHB	1.2033	0.054556
MCMDC2	1.2033	0.0880349
SDK1	1.2033	0.0085403
CEPT1	1.20247	0.0637043
MID1IP1	1.20247	0.0125462
ACSL1	1.20164	0.0297831
MPST	1.20164	0.004383
NDUFB8	1.20164	0.0391147
RPLP2	1.20164	0.0144903
RPS2	1.20164	0.0166419
AP5S1	-1.20164	0.0120776
ARL17B	-1.20164	0.0754111
BCL3	-1.20164	0.0385219
C9orf66	-1.20164	0.0767481
CAV2	-1.20164	0.0288205
LINC01558	-1.20164	0.0289647
LINC01558	-1.20164	0.0289647
MEOX1	-1.20164	0.0908783
MYLK4	-1.20164	0.0659276
TMEM138	-1.20164	0.0316238
ANXA2P1	-1.20247	0.0250549
BCOR	-1.20247	0.0495723
CTSZ	-1.20247	0.0177827
DHFR2	-1.20247	0.027915
DNAJB4	-1.20247	0.0648485
IFT81	-1.20247	0.0346273
MYO9B	-1.20247	0.0146579
PLA2R1	-1.20247	0.0374414
PLEKHA1	-1.20247	0.026739
PTPN21	-1.20247	0.0190125
SLC38A2	-1.20247	0.032205
TFDP1	-1.20247	0.0741739
ZNF382	-1.20247	0.0952429
CCDC157	-1.2033	0.080992
DEPDC1B	-1.2033	0.0466344
FAM69A	-1.2033	0.079818
PLEKHM1	-1.2033	0.0111014
SCN11A	-1.2033	0.0450362
TANC1	-1.2033	0.0249266
CCDC15	-1.20414	0.0335528
DOC2B	-1.20414	0.0275167
LOC642980	-1.20414	0.0472075
TMEM63C	-1.20414	0.0960991
TRPM4	-1.20414	0.0038397
AHR	-1.20497	0.0600421
AQP11	-1.20497	0.0415495
CLPTM1L	-1.20497	0.0140137
ELOVL2	-1.20497	0.0499401
FLI1	-1.20497	0.0485376
OTUD7B	-1.20497	0.0476082
PACS1	-1.20497	0.0184067
SPAG5	-1.20497	0.0760222
CMTM3	-1.20581	0.0391044
ENTPD1	-1.20581	0.0898259
ERAP1	-1.20581	0.0300482
IGSF3	-1.20581	0.0488993
INMT-FAM188B	-1.20581	0.0058679
KIF20B	-1.20581	0.0654269
MBD2	-1.20581	0.0182561
NOL3	-1.20581	0.019489
RCN3	-1.20581	0.035219
SFXN1	-1.20581	0.0255742
ZFP57	-1.20581	0.0323651
MIRLET7BHG	-1.20664	0.0155428
NDRG3	-1.20664	0.0119685
OR5K4	-1.20664	0.0679615
SNORA70F	-1.20664	0.0528669
TH	-1.20664	0.022479
ACER1	-1.20748	0.0375279
CELF4	-1.20748	0.0660621
FAM20A	-1.20748	0.0912277
HOOK2	-1.20748	0.0861904
INHBB	-1.20748	0.0498918
LOC100129434	-1.20748	0.0433232
TTTY13	-1.20748	0.0978354
UACA	-1.20748	0.0339347
BHLHE41	-1.20832	0.0680963
ENAH	-1.20832	0.0178631
N4BP3	-1.20832	0.0645734
PDZD2	-1.20832	0.0881191
BMF	-1.20916	0.0064243
C1orf54	-1.20916	0.0616902
FGF13	-1.20916	0.0999472
HAND2	-1.20916	0.0289837
CKAP2L	-1.20999	0.0870821
DAGLA	-1.20999	0.0068866
GALNT18	-1.20999	0.0428172
GIMAP1	-1.20999	0.0122356
HIST1H2AJ	-1.20999	0.0758526
HIVEP3	-1.20999	0.0112745
LOC100131496	-1.20999	0.0138834
LRRFIP1	-1.20999	0.0311739
PAM	-1.20999	0.0254226
PDE7B	-1.20999	0.0281508
PPIC	-1.20999	0.0234604
SIAE	-1.20999	0.0865309
GMIP	-1.21083	0.0871391
GPR176	-1.21083	0.0187676
KEL	-1.21083	0.0325743
SERINC5	-1.21083	0.0744943
ZIK1	-1.21083	0.0193792
CELA3A	-1.21167	0.0348602
CEP128	-1.21167	0.0153856
TMED3	-1.21167	0.0419215
WDR54	-1.21167	0.0037464
ANXA1	-1.21251	0.0204094
BICC1	-1.21251	0.0942181
CDC7	-1.21251	0.0980699
JAKMIP2	-1.21251	0.0793886
NOVA1	-1.21251	0.0821013
NTRK2	-1.21335	0.0815095
PEA15	-1.21335	0.008566
PTPN11	-1.21335	0.0427954
RAB43	-1.21335	0.0631065
FLJ30064	-1.21419	0.073721
GABRB2	-1.21419	0.0330915
GATSL2	-1.21419	0.0120233
GATSL2	-1.21419	0.0120233
PCNX2	-1.21419	0.0097992
XXYLT1	-1.21419	0.0164702
CNN3	-1.21504	0.0076211
HOXA-AS2	-1.21504	0.0048404
TNNT3	-1.21504	0.0525172
TPD52	-1.21504	0.0254102
GAPDHS	-1.21588	0.0390994
LDLRAD2	-1.21588	0.0068241
LMNA	-1.21588	0.0312448
MIR218-2	-1.21588	0.0242126
NEK6	-1.21588	0.0221378
PLBD2	-1.21588	0.0121144
RAPGEFL1	-1.21588	0.0178183
RASAL2	-1.21588	0.0594401
SNTB2	-1.21588	0.0607776
ADGRL1	-1.21672	0.0560219
CARD18	-1.21672	0.0179928
CD3EAP	-1.21672	0.0022739
PPP1R9B	-1.21672	0.0086755
THSD7B	-1.21672	0.080709
TUBB2B	-1.21672	0.0077262
CLIP1	-1.21757	0.0305153
GJB1	-1.21757	0.0919503
LOC645769	-1.21757	0.0820954
ACBD4	-1.21841	0.002839
CHMP7	-1.21841	0.0121296
GPR162	-1.21841	0.0574727
KIAA1671	-1.21841	0.0207464
TNFSF10	-1.21841	0.0536869
TRAM1L1	-1.21841	0.0461465
XPNPEP2	-1.21841	0.0458497
ANTXR1	-1.21926	0.0312351
C1QTNF3	-1.21926	0.0221102
CPEB4	-1.21926	0.0389657
FRK	-1.21926	0.0599599
IQCG	-1.21926	0.0270409
ITGA1	-1.21926	0.0387739
SOCS4	-1.21926	0.0221313
SYT11	-1.21926	0.0262247
ZHX3	-1.21926	0.0203211
LYRM9	-1.2201	0.0691971
LYRM9	-1.2201	0.0691971
BACE2	-1.22095	0.0098842
COL9A2	-1.22095	0.0133346
CYP4V2	-1.22095	0.0703648
FLNA	-1.22095	0.0226695
LAMA3	-1.22095	0.0711552
MIR485	-1.22095	0.0782917
PECAM1	-1.22095	0.0335136
ABCG2	-1.22179	0.02012
BCL2L15	-1.22179	0.0444314
CAMK2G	-1.22179	0.007609
CDH11	-1.22179	0.0822296
DUSP18	-1.22179	0.0117641
EMP1	-1.22179	0.0413209
FAM114A1	-1.22179	0.032832
GUCY2F	-1.22179	0.0849173
PKI55	-1.22179	0.0409916
PTPRB	-1.22179	0.0446623
TRIM34	-1.22179	0.0207699
CENPU	-1.22264	0.0128661
CHD3	-1.22264	0.0354794
CLGN	-1.22264	0.0074105
FAM171B	-1.22264	0.0208263
IL17RE	-1.22264	0.0788878
NEK7	-1.22264	0.0192025
PLXDC1	-1.22264	0.0139733
SPTBN1	-1.22264	0.0083027
STK17A	-1.22264	0.0311253
HIST1H2AI	-1.22349	0.0200915
PDE5A	-1.22349	0.0326439
PGM5	-1.22349	0.0622661
PTAFR	-1.22349	0.055488
ZDHHC3	-1.22349	0.0128713
ZMAT3	-1.22349	0.0392798
BICD1	-1.22434	0.0070277
DAB2	-1.22434	0.0631368
GUCY2C	-1.22434	0.0982607
LINC00905	-1.22434	0.0139826
C20orf194	-1.22519	0.0194774
CEP170B	-1.22519	0.0137524
ELMSAN1	-1.22519	0.0028345
KCTD10	-1.22519	0.0200245
KRT18	-1.22519	0.0552667
SLC39A10	-1.22519	0.0111342
SYNPO2	-1.22519	0.0650647
TXNRD1	-1.22519	0.0156649
ADD2	-1.22603	0.0976463
FAM107A	-1.22603	0.0650259
GNB4	-1.22603	0.0434413
HIST1H3A	-1.22603	0.0420023
LOC100505501	-1.22603	0.0880853
LURAP1L	-1.22603	0.0240639
MAGED1	-1.22603	0.00548
OR51B6	-1.22603	0.049342
PDGFRA	-1.22603	0.0445701
C11orf24	-1.22688	0.004967
C8orf48	-1.22688	0.0213893
MARCKS	-1.22688	0.0135769
MIR24-2	-1.22688	0.0855147
NCKAP5	-1.22688	0.0159174
RNF165	-1.22688	0.0794585
STARD9	-1.22688	0.0197213
YAP1	-1.22688	0.0115437
C10orf67	-1.22774	0.0938409
FBLN2	-1.22774	0.0424
FEZ1	-1.22774	0.0163098
FOXE1	-1.22774	0.0335007
GLRX	-1.22774	0.0859537
PLXND1	-1.22774	0.0081889
SSC4D	-1.22774	0.0198512
WSCD1	-1.22774	0.0223637
ABCC6	-1.22859	0.0442049
ARHGEF10	-1.22859	0.0272873
ARHGEF10L	-1.22859	0.0019283
FMO6P	-1.22859	0.0811607
POU5F1B	-1.22859	0.0106394
SLC35B4	-1.22859	0.0219279
GLB1	-1.22944	0.0427328
SNORD115-48	-1.22944	0.0545674
STK40	-1.22944	0.0046545
ZNF461	-1.22944	0.0321438
ASAP2	-1.23029	0.0043571
KLF12	-1.23029	0.0196589
RGS5	-1.23029	0.0458936
TNS3	-1.23029	0.0253237
ANGPT2	-1.23114	0.0871349
ATP2B1	-1.23114	0.0533437
CHN1	-1.23114	0.0400794
DOCK10	-1.23114	0.0446668
EFCAB3	-1.23114	0.0283914
LONRF3	-1.23114	0.0147061
PGM5	-1.23114	0.0596126
TMEM19	-1.23114	0.0268766
ZFHX3	-1.23114	0.006755
APBB1IP	-1.232	0.044992
COL16A1	-1.232	0.0033964
ETV1	-1.232	0.0683926
HID1	-1.232	0.0120087
POLR3G	-1.232	0.0278074
TMCO3	-1.232	0.0074213
BAG3	-1.23285	0.0036768
CEP135	-1.23285	0.0289599
HIP1	-1.23285	0.0660022
YWHAH	-1.23285	0.0088852
HHEX	-1.23371	0.0390187
OLFML1	-1.23371	0.035293
PAPSS2	-1.23371	0.0932882
PIH1D3	-1.23371	0.0035967
SPECC1	-1.23371	0.0086641
TLE3	-1.23371	0.0156879
TPGS2	-1.23371	0.0053157
AOC2	-1.23456	0.0138704
CST4	-1.23456	0.0478177
DCUN1D3	-1.23456	0.0139717
FSD1L	-1.23456	0.0110499
KIF4A	-1.23456	0.0645387
LASP1	-1.23456	0.0130608
TRIP10	-1.23456	0.0175644
CCNE2	-1.23542	0.028215
CDR2L	-1.23542	0.0152509
CFB	-1.23542	0.0774254
COL11A1	-1.23542	0.006609
ITPK1	-1.23542	0.0160264
ASPHD2	-1.23628	0.0771418
EPHB6	-1.23628	0.0090941
TBC1D8B	-1.23628	0.0314965
TCP11L2	-1.23628	0.0765007
ABCC6	-1.23713	0.0362554
ACKR3	-1.23713	0.0642127
TNIP1	-1.23713	0.015901
CATSPER2	-1.23799	0.0343357
COL6A1	-1.23799	0.0081412
FLJ37201	-1.23799	0.0031041
INSL6	-1.23799	0.0287755
ITGA9	-1.23799	0.0120439
DDR2	-1.23885	0.0200629
GPX8	-1.23885	0.0433598
MARK1	-1.23885	0.0322106
AGPAT4	-1.23971	0.0224262
ARHGEF39	-1.23971	0.0061223
ARRDC4	-1.23971	0.019835
CRIP1	-1.23971	0.033923
ELF4	-1.23971	0.0352672
GNA12	-1.23971	0.0148635
IFNK	-1.23971	0.0347583
LRRIQ3	-1.23971	0.067752
RAB7B	-1.23971	0.0067549
STARD9	-1.23971	0.0206588
TBC1D9B	-1.23971	0.011419
CFB	-1.24057	0.0697917
DOK6	-1.24057	0.0408709
HERC2P4	-1.24057	0.035709
KLHL5	-1.24057	0.0231139
KRTAP20-3	-1.24057	0.0545245
LIMCH1	-1.24057	0.0721932
ASPH	-1.24143	0.0161489
BST1	-1.24143	0.0145688
CD163L1	-1.24143	0.0933325
CDC25B	-1.24143	0.0314741
COLCA1	-1.24143	0.0655029
CYB561	-1.24143	0.0081805
GAS1	-1.24143	0.0106515
GATA3-AS1	-1.24143	0.0039618
HOXC8	-1.24143	0.0124899
PDCL3	-1.24143	0.0076826
SLC25A51	-1.24143	0.0247566
SPATA18	-1.24143	0.0448581
USP35	-1.24143	0.0060984
AMIGO2	-1.24229	0.0335519
DNASE2B	-1.24229	0.0318332
PANX1	-1.24229	0.0199716
PUS7L	-1.24229	0.0325251
FAM151B	-1.24315	0.0148109
HERC2P4	-1.24315	0.0332829
SLC1A1	-1.24315	0.008417
SSPN	-1.24315	0.0360887
BIRC3	-1.24401	0.0577522
CLEC4A	-1.24401	0.0681377
FLVCR1-AS1	-1.24401	0.0744418
GRIP1	-1.24401	0.0291413
KIF1C	-1.24401	0.0155046
LRRC38	-1.24401	0.0611286
NRROS	-1.24401	0.0156637
RNF19A	-1.24401	0.0105732
KIAA1456	-1.24487	0.0193711
CEP295NL	-1.24574	0.0013576
GOLGA3	-1.24574	0.002555
RASSF3	-1.24574	0.0343151
TRAM2	-1.24574	0.0135935
ITGAV	-1.2466	0.0326955
LACE1	-1.2466	0.0079991
OSGIN1	-1.2466	0.0228882
ARHGAP15	-1.24747	0.0885493
CD44	-1.24747	0.0417457
EPHB2	-1.24747	0.0240428
KIAA0825	-1.24747	0.0503855
LOC100287166	-1.24747	0.001184
MYO1D	-1.24747	0.0390964
PCDH19	-1.24747	0.0336601
TEK	-1.24747	0.0422172
ANKRD18B	-1.24833	0.0719776
AR	-1.24833	0.0761561
KIF5C	-1.24833	0.0068517
LAIR1	-1.24833	0.0615448
SSH1	-1.24833	0.0073121
CC2D2A	-1.2492	0.0257072
FADS3	-1.2492	0.0020675
FAM171A1	-1.2492	0.0017917
IFITM10	-1.2492	0.0711837
KIF5B	-1.2492	0.0150673
RNF133	-1.2492	0.0744168
SPON2	-1.2492	0.0651944
STS	-1.2492	0.0196511
COL6A2	-1.25006	0.0149732
IL16	-1.25006	0.024503
TCEANC	-1.25006	0.0127491
CNTN3	-1.25093	0.0338767
GEN1	-1.25093	0.0040746
KAZN	-1.25093	0.0036032
NAALADL2	-1.25093	0.0289517
PRKCD	-1.25093	0.0618461
SLC41A2	-1.25093	0.0495528
SULT6B1	-1.25093	0.0839578
ASRGL1	-1.2518	0.0143614
CYP2C18	-1.2518	0.0223215
ERBB2	-1.2518	0.0048697
LINC00965	-1.2518	0.0068854
LINC00965	-1.2518	0.0068854
MMP7	-1.2518	0.0471712
CD4	-1.25266	0.0954147
CENPF	-1.25266	0.0803693
CFB	-1.25266	0.0515026
HIST1H2BM	-1.25266	0.0902391
HLA-DQA1	-1.25266	0.0873412
NAA40	-1.25266	0.0072943
RN7SL737P	-1.25266	0.0417719
UBE2V1	-1.25266	0.0104347
GPR137B	-1.25353	0.0357494
HDC	-1.25353	0.0465377
PGM5	-1.25353	0.0257281
CCDC88A	-1.2544	0.0292922
CLIC2	-1.2544	0.0271821
CLMP	-1.2544	0.0143197
ERCC6L	-1.2544	0.0200595
FILIP1	-1.2544	0.0498445
HACD4	-1.2544	0.0981645
PRSS23	-1.2544	0.0898133
TTC7A	-1.2544	0.0026309
FAM84B	-1.25527	0.0085499
HES1	-1.25527	0.0338684
PRAMEF5	-1.25527	0.0570397
OR6C75	-1.25527	0.0441584
PDE4B	-1.25527	0.0545256
PIGT	-1.25527	0.0250619
SLC25A30	-1.25527	0.0247184
ZNF385D	-1.25527	0.0965356
HLA-DQA1	-1.25614	0.0799864
JAM2	-1.25614	0.0274946
LINC00965	-1.25614	0.0061538
LINC00965	-1.25614	0.0061538
LOC643406	-1.25614	0.0682336
LRRC4C	-1.25614	0.019815
TAX1BP3	-1.25614	0.0222987
PLEKHO1	-1.25614	0.0393029
SLC16A2	-1.25614	0.0137639
DTL	-1.25701	0.0655885
ETV3	-1.25701	0.0084125
GABRA3	-1.25701	0.0945586
LTBP3	-1.25701	0.0040471
PAK3	-1.25701	0.0133879
PTGR2	-1.25701	0.0117324
PODXL	-1.25788	0.0344951
TPX2	-1.25788	0.0527722
COL5A1	-1.25876	0.0269899
FLNC	-1.25876	0.0219296
GIMAP7	-1.25876	0.0080922
RNASEL	-1.25876	0.0083516
BHLHE40	-1.25963	0.0584709
CYP2C8	-1.25963	0.0753345
FAM107B	-1.25963	0.0606161
PGM5	-1.25963	0.0209665
PLIN3	-1.25963	0.016443
SLC18A2	-1.25963	0.0399167
TRIM8	-1.25963	0.0110169
HLA-DQA1	-1.2605	0.0822617
LOC388022	-1.2605	0.0327367
LTBP4	-1.2605	0.0128996
ADAMTS15	-1.26138	0.0462142
AMDHD1	-1.26138	0.0192593
BRD7P3	-1.26138	0.0303986
CHAC1	-1.26138	0.0221406
DOK5	-1.26138	0.0544975
EPB41L1	-1.26138	0.0228203
ITGA3	-1.26138	0.0052666
LOC100132686	-1.26138	0.026774
MIR134	-1.26138	0.0981233
SPARC	-1.26138	0.0089623
TENM1	-1.26138	0.0384825
CFAP221	-1.26225	0.0353541
FP248	-1.26225	0.0383773
OGFRL1	-1.26225	0.001434
PDGFRL	-1.26225	0.0445298
ELK3	-1.26313	0.0149217
FAM177A1	-1.26313	0.0206934
MIR4435-2HG	-1.26313	0.0074214
SPRYD3	-1.26313	0.0162453
TNFRSF10D	-1.26313	0.0056908
C10orf91	-1.264	0.0665117
DOK1	-1.264	0.0130356
FSCN1	-1.264	0.0096573
VOPP1	-1.264	0.0041213
AADACL2	-1.26488	0.0412521
AFAP1L2	-1.26488	0.0103437
PTPRU	-1.26488	0.0002471
CD34	-1.26576	0.0059015
FRZB	-1.26576	0.0436158
LAMB2	-1.26576	0.0078306
LRRFIP1	-1.26576	0.0140605
LRRFIP1	-1.26576	0.0624604
MRC2	-1.26576	0.0529618
NLN	-1.26576	0.0152905
REM1	-1.26576	0.0050186
VKORC1L1	-1.26576	0.0694153
C16orf45	-1.26663	0.0195364
CDK1	-1.26663	0.0602639
DDIT4L	-1.26663	0.0288676
PXDC1	-1.26663	0.0030549
LINC00965	-1.26751	0.0051006
NDST1	-1.26751	0.0123759
SLC39A11	-1.26751	0.0152749
VOPP1	-1.26751	0.0040901
ABCC1	-1.26839	0.0091244
AS3MT	-1.26839	0.0623701
CDH6	-1.26839	0.0944088
CENPK	-1.26839	0.0746996
DHDDS	-1.26839	0.0290204
LILRA4	-1.26839	0.045841
MYLK	-1.26839	0.0111863
RGS7BP	-1.26839	0.0751208
SNORA74A	-1.26839	0.0897416
CCL22	-1.26927	0.0410371
CKAP2	-1.26927	0.0760436
DMPK	-1.26927	0.0069166
FAM129B	-1.26927	0.0032324
KCNB1	-1.26927	0.018904
LINC00189	-1.26927	0.0161645
LINC00965	-1.26927	0.0056661
LRRK1	-1.26927	0.0170251
PRRX1	-1.26927	0.0202422
TPM2	-1.26927	0.002768
TUBA1A	-1.26927	0.0135004
CCDC85A	-1.27015	0.025239
CLEC1A	-1.27015	0.0286627
COL3A1	-1.27015	0.079323
CUTC	-1.27015	0.0091506
KLRF1	-1.27015	0.0590231
SMAD1	-1.27015	0.0308538
STEAP2	-1.27015	0.0481574
AKR1C1	-1.27103	0.001931
RASA4	-1.27103	0.0748324
TTTY12	-1.27103	0.0620088
ZCCHC24	-1.27103	0.0029634
FGD5	-1.27191	0.0157679
LOXL4	-1.27191	0.0029853
OLFML3	-1.27191	0.0330417
SNCAIP	-1.27191	0.0140299
ADGRA2	-1.27279	0.0231897
CDC42EP1	-1.27279	0.0061857
DDR2	-1.27279	0.0288603
RASA4	-1.27279	0.0964154
ADAP2	-1.27368	0.0502735
IRF2BPL	-1.27368	0.001261
TMEM139	-1.27368	0.0196026
ZFAT	-1.27368	0.0038868
ANKRD30A	-1.27456	0.0852589
LINC00965	-1.27456	0.0042841
LINC00965	-1.27456	0.0042841
LOC439938	-1.27456	0.0981703
MS4A12	-1.27456	0.0499441
MSRB3	-1.27456	0.009539
SYNM	-1.27456	0.0205488
LDLRAD4	-1.27544	0.0192526
NOTCH3	-1.27544	0.0018399
SCARA5	-1.27544	0.0495164
DBN1	-1.27633	0.0042355
GPER1	-1.27633	0.0069286
TMEM246	-1.27633	0.0200986
CSF1	-1.27721	0.0063108
LINC00965	-1.27721	0.0039864
LINC00965	-1.27721	0.0039864
SGMS2	-1.27721	0.0127439
VIT	-1.27721	0.0463684
EFEMP1	-1.2781	0.0057423
IL33	-1.2781	0.0415689
LINC00965	-1.2781	0.0037575
LINC00965	-1.2781	0.0037575
LOC728283	-1.2781	0.0497296
ST8SIA6	-1.2781	0.037411
TLE2	-1.2781	0.012192
VASN	-1.2781	0.0035132
CASP10	-1.27899	0.0016569
P4HA2	-1.27899	0.0048182
PARD3B	-1.27899	0.0050553
C2	-1.27987	0.0919337
C2	-1.27987	0.0919904
C2	-1.27987	0.0919904
FAM105A	-1.27987	0.0444753
INMT-FAM188B	-1.27987	0.0063192
ITGA5	-1.27987	0.027267
PCDHB13	-1.27987	0.0041137
SH3RF2	-1.27987	0.013429
FAM72A	-1.28076	0.016427
SKI	-1.28076	0.0054632
AKR1C1	-1.28165	0.0086498
CCL13	-1.28165	0.0490223
LINC00965	-1.28165	0.0036737
LINC00965	-1.28165	0.0036737
LINC00965	-1.28165	0.0036737
LINC00965	-1.28165	0.0036737
LINC00965	-1.28165	0.0036737
LINC00965	-1.28165	0.0126036
STK32B	-1.28165	0.0122982
CD200	-1.28254	0.0027558
KCNE3	-1.28254	0.0481198
FBN1	-1.28343	0.0191892
LINC00965	-1.28343	0.0040192
NPHP1	-1.28343	0.0020863
PLCB2	-1.28343	0.0842404
STC1	-1.28343	0.0642723
LOC100128185	-1.28432	0.077186
LOXL1	-1.28432	0.0064162
MCTP1	-1.28432	0.0196627
NLGN1	-1.28432	0.03291
TSHZ3	-1.28432	0.0082948
ADCK1	-1.28521	0.0048307
ALDH1L2	-1.28521	0.029497
ECM2	-1.28521	0.0091487
LINC00965	-1.28521	0.0028998
LINC00965	-1.28521	0.0028998
LINC00965	-1.28521	0.0028998
LINC00965	-1.28521	0.0028998
DAAM1	-1.2861	0.0110167
GRIA3	-1.2861	0.0278972
ITPRIPL2	-1.2861	0.0058362
CYB561A3	-1.28699	0.004795
MN1	-1.28699	0.0034881
PLPPR4	-1.28699	0.0004983
PTGER4	-1.28699	0.0225072
SLIT3	-1.28699	0.0073257
TMEM119	-1.28699	0.0394676
C10orf11	-1.28788	0.0025708
CSAG4	-1.28788	0.0572789
GLYAT	-1.28788	0.0928745
MIR218-1	-1.28788	0.0083675
OR5AP2	-1.28788	0.042653
ZNF772	-1.28788	0.0101176
ADAMTS2	-1.28877	0.0047928
FAM72A	-1.28877	0.0137212
GBX1	-1.28877	0.0245238
HSPA12A	-1.28877	0.011972
PKD2	-1.28877	0.01393
ATP6V1C2	-1.28967	0.0082937
DPYSL3	-1.28967	0.0137192
ECT2	-1.28967	0.0165437
NUAK1	-1.28967	0.0215392
TNFAIP3	-1.28967	0.0335793
EGR2	-1.29056	0.0536672
GIMAP8	-1.29056	0.0283588
ITGB5	-1.29056	0.006537
APOBEC3B	-1.29146	0.0539795
CRY1	-1.29146	0.0092931
OR4F29	-1.29146	0.0274456
PLXNA1	-1.29146	0.0008825
SNORD115-2	-1.29146	0.0786284
CORO1C	-1.29235	0.0044763
DHFR	-1.29235	0.0468108
HMOX1	-1.29235	0.0306818
PDGFA	-1.29235	0.0012494
GAS7	-1.29325	0.0228459
INTS7	-1.29325	0.0088444
GGTA1P	-1.29504	0.0295335
HDLBP	-1.29504	0.0049292
IFFO2	-1.29504	0.0123872
ARHGEF37	-1.29594	0.0013672
CACNA2D1	-1.29594	0.0600472
EEA1	-1.29594	0.0037249
OR4F29	-1.29594	0.025749
OR4F29	-1.29594	0.025749
OR4F29	-1.29594	0.025749
CDRT4	-1.29684	0.0131728
CHSY3	-1.29684	0.0020503
CXXC5	-1.29684	0.0042045
EPPK1	-1.29684	0.0068128
LMOD1	-1.29684	0.057924
SPTA1	-1.29684	0.0417597
ACTN1	-1.29774	0.0013469
AKR1C2	-1.29864	0.0158014
DNM1	-1.29864	0.0094615
MXRA7	-1.29864	0.0051383
TMEM159	-1.29864	0.0090228
LINC00965	-1.29954	0.0024186
LINC00965	-1.29954	0.0024186
ST6GALNAC1	-1.29954	0.0013585
TESPA1	-1.29954	0.0337381
TSPAN18	-1.29954	0.0261
CPPED1	-1.30044	0.0209231
DHFR	-1.30044	0.0458675
LINC00965	-1.30044	0.0023715
MIR4435-2HG	-1.30044	0.0029475
MUC3A	-1.30044	0.0023156
RASA4	-1.30044	0.0554923
SEMA5A	-1.30044	0.0064586
THSD1	-1.30044	0.0011083
AMPD3	-1.30134	0.0210783
C12orf40	-1.30134	0.037258
EMP3	-1.30134	0.0584333
ERBB4	-1.30134	0.0909246
FMNL2	-1.30134	0.0035455
RHOH	-1.30134	0.0254054
C5orf64	-1.30224	0.0074769
CCIN	-1.30224	0.0560952
HAVCR2	-1.30224	0.0944989
ITGA2	-1.30224	0.0567654
GCNT1	-1.30315	0.0227174
PHLDA1	-1.30315	0.0211494
PWAR6	-1.30315	0.0374017
COL5A2	-1.30405	0.0114783
FAP	-1.30405	0.0745086
ADAM20P1	-1.30495	0.091476
AKR1C4	-1.30495	0.0363763
CAV1	-1.30495	0.0062717
FSIP2	-1.30495	0.0058409
TSHZ2	-1.30495	0.0167849
PKD1L1	-1.30586	0.0038197
CERCAM	-1.30677	0.017755
FGF14	-1.30677	0.0462641
HMCN1	-1.30677	0.0139558
LINC00312	-1.30677	0.0065126
SOBP	-1.30677	0.0016048
ARHGEF10	-1.30767	0.0021696
CD14	-1.30858	0.0789836
FAM72B	-1.30858	0.0092566
ST6GALNAC1	-1.30858	0.0009958
ADTRP	-1.31039	0.0067874
GM2A	-1.31039	0.0209271
MPZ	-1.31039	0.0089348
TIAM1	-1.3113	0.0124203
TRPC4	-1.3113	0.0556397
DHFR	-1.31221	0.0389631
GPC1	-1.31221	0.0177356
SLC22A5	-1.31221	0.0103125
CD109	-1.31312	0.0117799
ICAM1	-1.31312	0.050973
ARHGAP28	-1.31403	0.0059615
BGN	-1.31494	0.0294299
CGNL1	-1.31494	0.0238198
SNX33	-1.31494	0.001959
SPTSSB	-1.31494	0.015609
STARD9	-1.31494	0.0047598
PTGDR	-1.31585	0.0252513
SULF2	-1.31677	0.0134141
JUN	-1.31768	0.0865656
CAB39L	-1.31951	0.0280336
ELN	-1.31951	0.0050765
ZNF503	-1.31951	0.0064866
C11orf45	-1.32042	0.0164907
ELOVL7	-1.32042	0.0931621
LPGAT1	-1.32134	0.0047801
RSPO3	-1.32317	0.0681681
SEMA6A	-1.32317	0.0158954
ACBD7	-1.32409	0.09103
PLCD3	-1.32409	0.0046229
CLCA2	-1.32501	0.0615221
RAB27B	-1.32501	0.0250906
SCUBE2	-1.32501	0.049708
TPST2	-1.32501	0.008057
COL15A1	-1.32593	0.0057418
RAI14	-1.32593	0.0091347
SLC1A4	-1.32593	0.007467
EHBP1	-1.32777	0.0018943
ADAM28	-1.32869	0.0039269
CLSTN2	-1.32961	0.0549381
PTPRE	-1.32961	0.0359329
CDK6	-1.33053	0.0012113
DTX2	-1.33053	0.0050379
FAR2	-1.33053	0.0052592
GCNT2	-1.33053	0.000566
IMPAD1	-1.33053	0.0068784
P2RX7	-1.33053	0.0032839
FILIP1L	-1.33145	0.0072454
LRRFIP1	-1.33145	0.0056344
MMP16	-1.33237	0.0230624
HEG1	-1.3333	0.003409
NLRP13	-1.3333	0.0082094
IL20RB	-1.33422	0.0343197
MYOF	-1.33422	0.0123335
TTTY8B	-1.33422	0.0263714
TTTY8B	-1.33422	0.0263714
BTK	-1.33515	0.0662062
C10orf107	-1.33515	0.0940763
CCDC102B	-1.33515	0.0059188
KIAA0930	-1.33515	0.0056714
CECR1	-1.33793	0.0895694
FAM124B	-1.33793	0.0112261
PLA2G4A	-1.33793	0.0114467
STX2	-1.33793	0.0060626
CYP4X1	-1.33886	0.015675
CYSLTR1	-1.33886	0.0192921
KIR3DL1	-1.33886	0.0574974
KPNA2	-1.33886	0.0115304
KPNA2	-1.33886	0.0115778
PAPPA-AS1	-1.33886	0.009563
TSLP	-1.33886	0.0722786
EEPD1	-1.33978	0.0071555
TNXA	-1.33978	0.0071655
DSEL	-1.34071	0.0307265
KLF10	-1.34071	0.0022693
TSHZ2	-1.34071	0.0180513
RAMP3	-1.34164	0.0071586
PCDH7	-1.34257	0.0400243
VASH1	-1.34257	0.0025339
B3GALT1	-1.3435	0.0110272
LOXL3	-1.3435	0.003997
PPL	-1.3435	0.0446495
CLDN20	-1.34443	0.0403975
CXCL16	-1.34443	0.0937952
LGI2	-1.34443	0.0244611
MLPH	-1.34443	0.0016592
TNFRSF25	-1.34443	0.0009021
FKBP14	-1.34537	0.0094438
NOV	-1.34537	0.0108425
COBLL1	-1.3463	0.0030495
TLCD2	-1.3463	0.0008082
TMEM30B	-1.3463	0.0029286
AKR1C3	-1.34723	0.0277482
ISM1	-1.34817	0.0561915
TIGAR	-1.34817	0.0778629
AQP1	-1.3491	0.0356609
IGF2	-1.35097	0.0105823
IL18	-1.35097	0.0543856
MEDAG	-1.35097	0.0730465
TMC5	-1.35097	0.0282668
ARHGAP21	-1.35285	0.0020271
GRAPL	-1.35285	0.0007566
SCARNA23	-1.35285	0.0260144
AHNAK2	-1.35379	0.0611555
HILPDA	-1.35379	0.0355285
LFNG	-1.35379	0.0047572
TNXA	-1.35379	0.0060757
TNXB	-1.35379	0.0060757
PIH1D2	-1.35472	0.0213452
SLAMF7	-1.35472	0.0942749
SLC6A6	-1.35472	0.0069064
SOX7	-1.35472	0.0070016
HTRA1	-1.35566	0.0008888
IQGAP2	-1.35566	0.0741411
SRPX2	-1.35566	0.0495954
VN1R1	-1.35566	0.0569801
HIST1H1A	-1.3566	0.0044181
SNORD115-25	-1.3566	0.0708445
GALR1	-1.35754	0.0534342
MIR107	-1.35754	0.0495384
MMP28	-1.35754	0.0057472
PPY	-1.35754	0.0907282
SH2D4A	-1.35754	0.0015846
TPO	-1.35754	0.0151423
TULP4	-1.35754	0.0256285
ITIH5	-1.36037	0.0027518
MALL	-1.36037	0.0067445
BHMT2	-1.36131	0.0059128
DAB2IP	-1.36131	0.0045387
ADCY7	-1.36226	0.0117532
LRRN3	-1.36226	0.0644385
PCDHB8	-1.36226	0.023713
THBD	-1.3632	0.0213481
TNXA	-1.3632	0.0040121
ABCC3	-1.36509	0.0234902
DNAPTP3	-1.36509	0.0184144
ZNF503-AS2	-1.36509	0.0359144
DUSP14	-1.36604	0.0013361
FFAR4	-1.36699	0.0316419
ID2	-1.36699	0.0224866
FGL1	-1.36794	0.0606352
PTPRJ	-1.36794	0.0610744
SFRP1	-1.36794	0.0308382
CALU	-1.36888	0.0025763
COL8A1	-1.36888	0.0712197
EMILIN2	-1.36888	0.0202388
FAT1	-1.36888	0.0046842
FAT4	-1.36888	0.0022053
DOK2	-1.36983	0.0448831
IMPAD1	-1.36983	0.006465
FAM102B	-1.37078	0.0043985
ICAM4	-1.37078	0.0336602
MAMDC2	-1.37268	0.0369016
MIR99A	-1.37268	0.0081863
TMEM64	-1.37268	0.0055255
CD9	-1.37364	0.0131789
FN1	-1.37364	0.0133699
HPD	-1.37364	0.0107904
LAMB3	-1.37364	0.081198
SYNPO	-1.37364	0.0018312
ARID5A	-1.3765	0.0255451
CMA1	-1.3765	0.0241638
HTATSF1P2	-1.37841	0.03736
TENM4	-1.37936	0.0061931
SSX6	-1.38032	0.0884285
DZIP1L	-1.38127	0.0014306
TNFRSF11B	-1.38223	0.0020588
TTC30B	-1.38319	0.0127292
ALDH1A2	-1.38415	0.0070049
COL12A1	-1.38415	0.0150945
P2RX6	-1.38415	0.0066755
CD83	-1.38511	0.0200489
LOC102724229	-1.38511	0.0223613
DNASE1L2	-1.38607	0.0851772
CLEC3B	-1.38703	0.0016031
DIXDC1	-1.38703	0.0017659
IRX6	-1.38896	0.0039792
STC2	-1.38896	0.0310206
FAM30A	-1.38992	0.0072193
OR2T8	-1.38992	0.0411079
AQP3	-1.39281	0.0005342
LINC01106	-1.39281	0.0019732
PDE4DIP	-1.39281	0.0012099
S100A6	-1.39281	0.0043156
CTHRC1	-1.39474	0.0110396
SIPA1L1	-1.39474	0.0020207
CD180	-1.39571	0.0223849
COTL1	-1.39571	0.0416126
MGP	-1.39571	0.016312
FGFR2	-1.39668	0.0916654
MIR126	-1.39668	0.0226212
RCAN2	-1.39668	0.0095452
ASPN	-1.39765	0.0369564
FIBIN	-1.40056	0.0048281
OR13H1	-1.40056	0.0219545
OR6A2	-1.4025	0.0525883
TPRG1	-1.40444	0.0294945
CD1B	-1.40542	0.0339871
NRP2	-1.40542	0.0040927
SPTAN1	-1.40542	0.0002786
PI16	-1.40737	0.0482665
RASA3	-1.40737	0.0045608
TUBB2A	-1.40737	0.001461
TUBB2A	-1.40737	0.001461
TLR7	-1.40834	0.0421547
MS4A2	-1.41128	0.0471273
SNORD116-16	-1.41128	0.0972786
SLC14A2	-1.41225	0.0366901
TUFT1	-1.41225	0.0011861
AFF2	-1.41323	0.0689694
ENC1	-1.41421	0.0042355
ZNF667-AS1	-1.41421	0.0040284
BCAT1	-1.41716	0.0291087
FBLN1	-1.41716	0.0041572
KIT	-1.41716	0.0200053
MRO	-1.41716	0.0302229
EPDR1	-1.41912	0.0085102
AMOTL2	-1.42109	0.002729
MYZAP	-1.42109	0.0030448
FLRT2	-1.42208	0.0107959
GGH	-1.42208	0.0032835
NFATC2	-1.42208	0.0112586
SULT1A1	-1.42208	0.0048055
ITGB4	-1.42306	0.0096061
WDPCP	-1.42306	0.0063012
NR4A2	-1.42405	0.0641364
PCDH9	-1.42603	0.0122869
SHTN1	-1.428	0.0179148
SIX1	-1.43098	0.0648361
GLIPR2	-1.43594	0.0135115
LOXL2	-1.43594	0.0041913
GFRA2	-1.43694	0.0071561
ATP6V1G3	-1.43794	0.0162694
CXorf21	-1.43794	0.0698344
IL6	-1.43794	0.0799166
ADAMTS10	-1.43893	0.0019091
FMNL1	-1.43993	0.0111184
ITGBL1	-1.43993	0.0109512
ARHGAP20	-1.44093	0.0092866
NDNF	-1.44293	0.0041104
PMAIP1	-1.44293	0.0225141
CYSLTR2	-1.44393	0.0080453
MIR27A	-1.44493	0.0216098
MIR95	-1.44593	0.0057882
ANKRD30B	-1.44693	0.0522814
CD69	-1.44693	0.0569261
KIAA0101	-1.44794	0.0555114
CPA3	-1.45095	0.0367959
CYTH4	-1.45196	0.032541
C1orf198	-1.45397	0.0001153
F2R	-1.457	0.0050196
LOC100996634	-1.457	0.0385874
NCEH1	-1.45801	0.0415588
CCR1	-1.46003	0.0878019
KCNT2	-1.46003	0.0019084
SCARA3	-1.46003	0.0199429
MIR21	-1.46104	0.0215869
TRIM16	-1.46307	4.47e-05
MFAP4	-1.46409	0.0020721
ALDH1A3	-1.4651	0.0794239
HPGDS	-1.4651	0.0614321
LTBP2	-1.46815	0.0005928
GAS2L3	-1.46917	0.0048153
FMOD	-1.47019	0.0300233
PDE1C	-1.47223	0.0029363
NAV3	-1.47325	0.0035109
CXCL2	-1.47529	0.0064022
NOX4	-1.47734	0.0022558
PLEKHO2	-1.47734	0.0011052
PRND	-1.47734	0.0284104
SYNC	-1.47836	0.0044696
MOP-1	-1.48349	0.0214939
MID1	-1.48761	0.0003539
ANO3	-1.48865	0.010487
PDE4DIP	-1.48865	0.000609
CCL2	-1.49071	0.0547718
LINC01123	-1.49071	8.21e-05
RERG	-1.49071	0.0041322
FRMD4B	-1.49278	0.0059965
XG	-1.49485	0.0025304
CD84	-1.49589	0.0181544
GDF10	-1.49796	0.0001049
HIST1H3B	-1.499	0.0764237
WISP2	-1.499	0.0005974
FAM26E	-1.50108	0.0002891
MSTO2P	-1.50212	0.00244
OMD	-1.50316	0.0054548
GDA	-1.5042	0.0077217
SULT1A2	-1.50629	0.0004958
RGS21	-1.50733	0.0136922
ITGA11	-1.51047	0.0129991
ZNF219	-1.51152	0.0028462
ABI3BP	-1.51257	0.0032132
ANKDD1A	-1.51362	2.79e-05
MARCO	-1.51362	0.007758
SAMD4A	-1.51362	0.0039975
DGKI	-1.51467	0.0015133
SEMA3D	-1.51467	0.0095051
C3AR1	-1.51887	0.0574278
DUSP10	-1.51887	0.0054461
FAT2	-1.51887	0.0025153
OLFML2B	-1.51992	0.0013228
TPSB2	-1.52203	0.0320824
RAB30	-1.52309	0.0006436
CCL18	-1.52414	0.0983763
FGF1	-1.52414	0.0004279
GNG2	-1.52626	0.0020354
LINC01123	-1.52626	0.0002071
CCDC173	-1.52732	0.0194076
TPSB2	-1.5305	0.0298357
SNCG	-1.53262	0.0046518
GPLD1	-1.53581	0.0043302
CD248	-1.53794	0.0057416
GPR183	-1.54007	0.0163419
NRP2	-1.54542	0.0025402
CD1C	-1.54971	0.0066006
CDKN2B	-1.54971	0.0033678
CT83	-1.54971	0.0106612
PALLD	-1.54971	0.0004309
AFF3	-1.55294	0.0008073
NTM	-1.55294	0.0039121
FREM1	-1.55509	0.0001308
C1QTNF9	-1.55617	0.0383733
NEXN	-1.55725	4.08e-05
HEXIM1	-1.56049	0.0001346
GRIN2B	-1.56482	0.0024601
MSTO2P	-1.56591	0.0012426
NCKAP5L	-1.56591	0.0006598
HSPB8	-1.56699	0.0034172
ARHGAP11A	-1.56808	0.0366318
PLEKHG5	-1.56808	0.0034385
NCKAP5L	-1.56917	0.0017102
SUCNR1	-1.57135	0.015768
IGFBP6	-1.57243	0.0019367
SLIT2	-1.57462	0.000696
KLHL31	-1.5768	0.0018198
PTGFR	-1.5768	0.0405939
KLHL30	-1.57789	0.0101439
ANGPT1	-1.58227	0.0006637
CCDC80	-1.58447	0.0008664
TRIM16	-1.58557	1.31e-05
HSPB7	-1.58997	0.0584647
CD28	-1.59107	0.0145658
AXIN2	-1.59218	0.0011923
MIR133A1HG	-1.59218	0.0248586
KCNA2	-1.59328	0.075156
RNY1	-1.59328	0.0339774
CCL8	-1.59438	0.0231152
CTGF	-1.59438	0.0024277
AMOT	-1.5977	0.0056608
FAM72B	-1.59992	0.0671373
B4GALT6	-1.60436	0.015107
FAM198B	-1.60436	0.0004392
TUBB2A	-1.60436	0.0011524
DACOR1	-1.61217	0.0537371
DPT	-1.61328	0.0030372
TMEM182	-1.61328	0.0180301
SLC24A3	-1.61664	0.001027
ACP5	-1.62113	0.0690395
CFHR2	-1.62113	0.0082064
RASSF9	-1.63694	3.23e-05
CADM3	-1.64035	0.0172497
CES1	-1.64035	0.0011024
CRYAB	-1.6449	0.0005771
MSR1	-1.64604	0.0890949
MBD3L1	-1.65061	0.0129547
ADAM22	-1.65749	2.87e-05
MAP1B	-1.6644	0.0010257
GNG2	-1.66786	0.0152732
PTCHD4	-1.67946	0.0015921
CFH	-1.68763	0.0005819
LEP	-1.6888	0.0005941
GRB14	-1.69466	0.0001724
FSTL3	-1.70527	0.0014102
CCND2	-1.70882	0.000946
CAP2	-1.71356	0.0004129
CFHR1	-1.71356	0.0003983
CFHR3	-1.71713	0.0005471
CFHR1	-1.72309	0.0010154
PCLO	-1.72309	0.0127016
MFAP5	-1.72788	0.0057419
ANKRD30B	-1.73027	0.0094278
PMEPA1	-1.73027	0.0025394
MXRA5	-1.73388	0.0038651
FMN1	-1.7411	0.0696441
CHI3L1	-1.75078	0.0849271
CILP	-1.75808	0.0034855
SEMA3C	-1.76052	0.0006695
NPY1R	-1.76786	0.000907
PLAC9	-1.77399	4.07e-05
APLNR	-1.78509	0.0028034
PLK2	-1.78633	0.0003069
LOX	-1.78757	0.0028182
TM4SF19	-1.79626	0.0705444
KANK4	-1.79751	0.0048191
CES1P1	-1.80876	0.0007827
MSC	-1.82513	0.0018231
SEMA3B	-1.82893	9.7e-06
S100A4	-1.83274	0.0004527
FCER1A	-1.84165	0.0011639
FCGBP	-1.84293	0.0022974
VLDLR-AS1	-1.84421	0.0002742
TNMD	-1.85189	0.0016704
VGLL3	-1.88688	5.8e-05
ALCAM	-1.8908	0.0056644
NQO1	-1.91587	0.0001931
MASP1	-1.9172	0.0007299
VLDLR	-1.92519	0.001272
MMP9	-1.95477	0.0347674
RGS1	-1.97657	0.004789
LHCGR	-1.98343	0.0008381
SELE	-2.02792	0.0591831
HSD11B1	-2.05623	0.0029617
GSTT1	-2.11404	0.0563328
CXCL8	-2.14355	0.0099996
TRDN	-2.17347	0.0631632
IL1RN	-2.20381	0.024524
PRG4	-2.21914	0.0017938
PLA2G7	-2.23457	0.0278478
SFRP2	-2.23457	0.0001463
UCHL1	-2.26577	0.0013639
FLJ25758	-2.34567	0.0255174
SPP1	-2.41162	0.032878
SCIN	-2.65737	0.0004689
RANBP3L	-2.75108	3.76e-05
SPAG17	-2.77022	9e-05
NPR3	-2.90795	6.02e-05
NPR3	-3.01049	0.0001069
SFRP4	-3.05252	9.17e-05
EGFL6	-6.23332	0.0002086

[truncated: 5 more sheets: Table S11, Table S12, Table S13, Table S14, Table S15]
